# Supplementary material for: NOX4 has the potential to be a biomarker associated with colon cancer ferroptosis and immune infiltration based on bioinformatics analysis
Source: PubMed Central journal article supplement (PMC9554470; doi:10.3389/fonc.2022.968043), 2022-09-28
Supplement: DataSheet_1.pdf [file DataSheet_1.pdf]

## Supplementary 1. The flowchart of the whole study

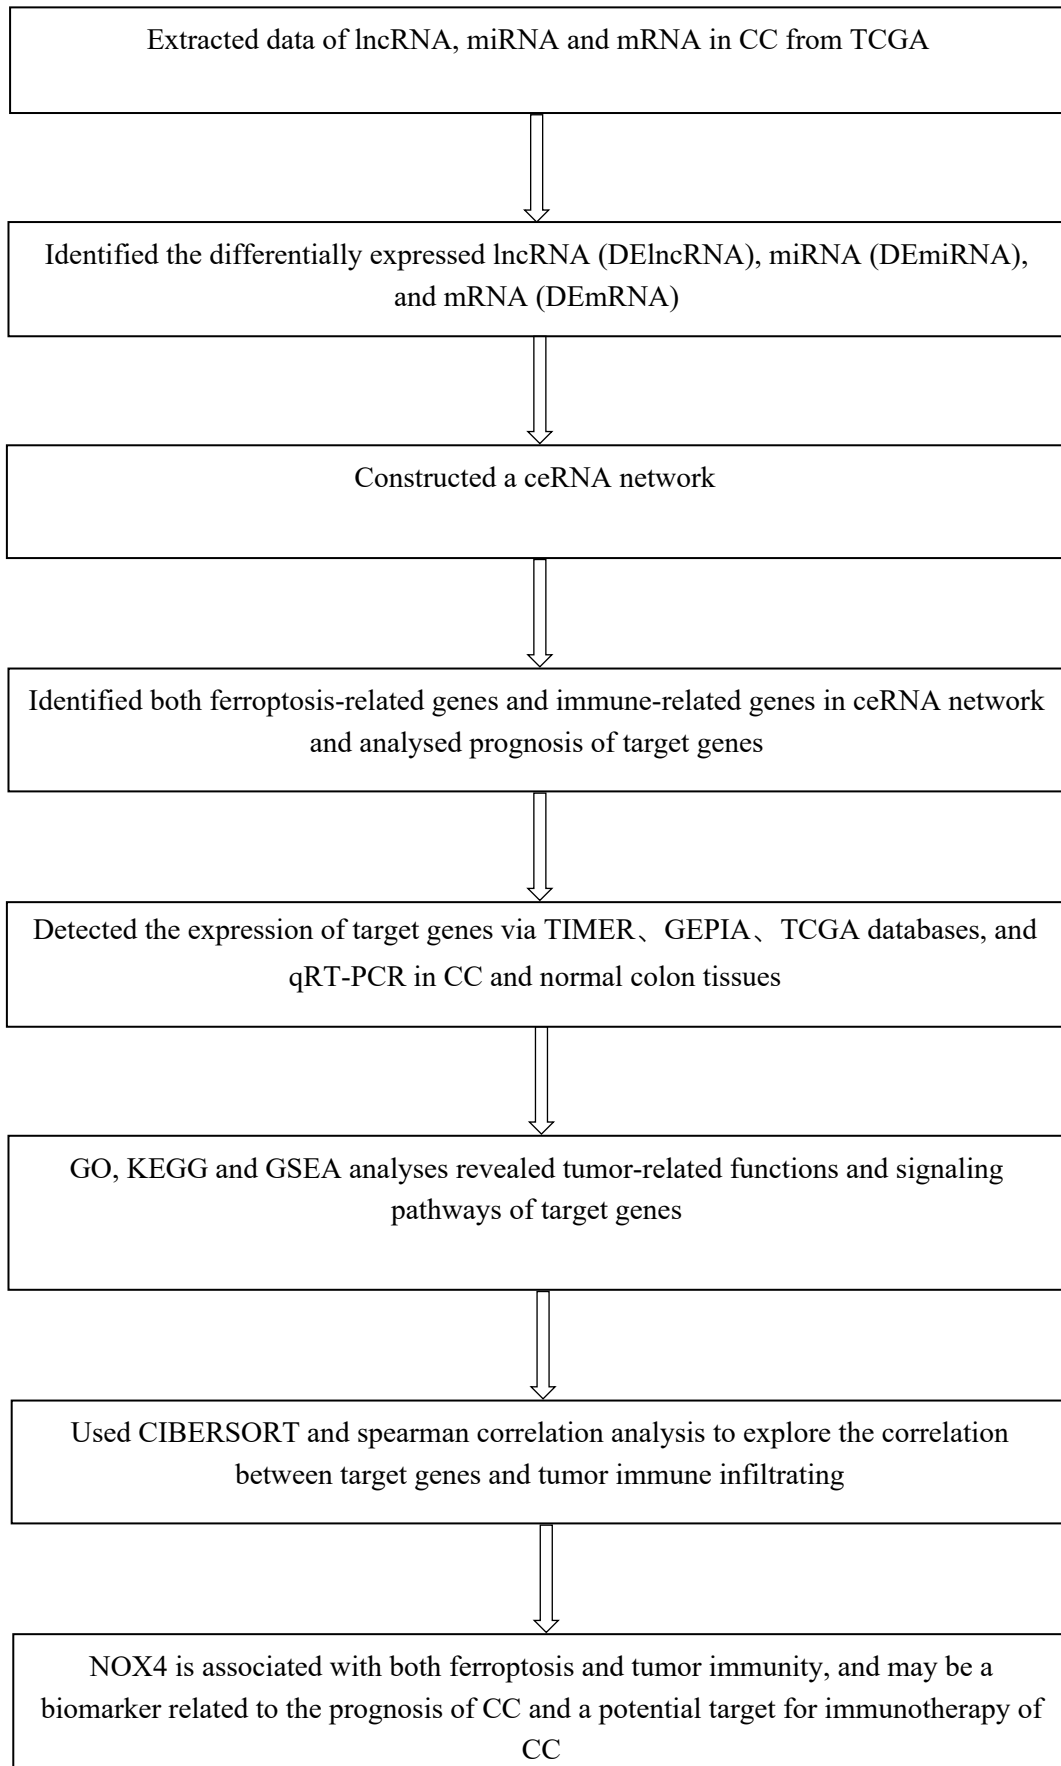



|                                            |                                          |                                   |                                                   |            |                        |                                     |          |          |                        |                            |                                     |                                     |
|--------------------------------------------|------------------------------------------|-----------------------------------|---------------------------------------------------|------------|------------------------|-------------------------------------|----------|----------|------------------------|----------------------------|-------------------------------------|-------------------------------------|
| ATG3                                       | Autophagy related 3                      | HGNC:209                          | Potential positive RNAi screening, gene           | Mice       | Mouse emb              | ATG3 :+ : LUbiquitin-li Q9NT62      | ATG3_HU  | 27514700 | IFNA5                  | interferon aIFN-alpha-     | 9                                   | Antigen_Processing_and_Presentation |
| ATG4D                                      | Autophagy related 4D cysteine peptid     | HGNC:207                          | Potential positive RNAi screening                 | Mice       | Mouse emb              | ATG4D :+ :Cysteine pr Q86TL0        | ATG4D_H  | 27514700 | IFNA6                  | interferon aIFN-alphaK     | 9                                   | Antigen_Processing_and_Presentation |
| ATG5                                       | Autophagy related 5                      | HGNC:589                          | Potential positive RNAi screening                 | Mice       | Mouse emb              | ATG5 :+ : LAutophagy Q9H1Y0         | ATG5_HU  | 27514700 | IFNA7                  | interferon aIFN-alphaJ     | 9                                   | Antigen_Processing_and_Presentation |
| BECN1                                      | Beclin 1                                 | HGNC:103                          | Potential positive RNAi screening                 | Mice       | Mouse emb              | BECN1 :+ : Beclin-1 Q14457          | BECN1_HI | 27514700 | IFNA8                  | interferon aIFN-alphaE     | 9                                   | Antigen_Processing_and_Presentation |
| MAP1LC3                                    | Microtubule associated protein 1 light   | HGNC:683                          | Potential positive RNAi screening                 | Mice       | Mouse emb              | MAP1LC3.Microtubul Q9H492           | MLP3A_H  | 27514700 | IFNA10                 | interferon aIFN-alphaC     | 9                                   | Antigen_Processing_and_Presentation |
| GABARAFGABA type A receptor associated pro | HGNC:132                                 | Potential positive RNAi screening | Mice                                              | Mouse emb  | GABARAFGamma-am P60520 | GBRL2_HI                            | 27514700 | IFNA13   | interferon a-          | 9                          | Antigen_Processing_and_Presentation |                                     |
| GABARAFGABA type A receptor associated pro | HGNC:406                                 | Potential positive RNAi screening | Mice                                              | Mouse emb  | GABARAFGamma-am Q9H0R8 | GBRL1_HI                            | 27514700 | IFNA14   | interferon aIFN-alphaF | 9                          | Antigen_Processing_and_Presentation |                                     |
| ATG16L1                                    | Autophagy related 16 like 1              | HGNC:214                          | Potential positive RNAi screening                 | Mice       | Mouse emb              | ATG16L1 :Autophagy-Q676U5           | A16L1_HU | 27514700 | IFNA16                 | interferon aIFN-alpha-     | 9                                   | Antigen_Processing_and_Presentation |
| WIPI1                                      | WD repeat domain, phosphoinositide       | HGNC:254                          | Potential positive RNAi screening                 | Mice       | Mouse emb              | WIPI1 :+ : IWD repeat Q5MNZ9        | WIPI1_HU | 27514700 | IFNA17                 | interferon aIFN-alphaI     | 9                                   | Antigen_Processing_and_Presentation |
| WIPI2                                      | WD repeat domain, phosphoinositide       | HGNC:322                          | Potential positive RNAi screening                 | Mice       | Mouse emb              | WIPI2 :+ : IWD repeat Q9Y4P8        | WIPI2_HU | 27514700 | IFNA21                 | interferon aIFN-alphaI     | 9                                   | Antigen_Processing_and_Presentation |
| SNX4                                       | Sorting nexin 4                          | HGNC:111                          | Potential positive RNAi screening                 | Mice       | Mouse emb              | SNX4 :+ : LSorting nex Q95219       | SNX4_HU  | 27514700 | IFNG                   | interferon gIFG IFI        | 12                                  | Antigen_Processing_and_Presentation |
| ATG13                                      | Autophagy related 13                     | HGNC:290                          | Knockout of ATG Gene knockout                     | Mice       | Mouse emb              | ATG13 :+ : Autophagy-Q75143         | ATG13_HI | 27514700 | KIR2DL1                | killer cell irCD158A K     | 19                                  | Antigen_Processing_and_Presentation |
| ULK2                                       | Unc-51 like autophagy activating kinase  | HGNC:134                          | Knockout of ULK Gene knockout                     | Mice       | Mouse emb              | ULK2 :+ : LSerine/thre Q81YT8       | ULK2_HU  | 27514700 | KIR2DL2                | killer cell irCD158B1 C    | 19                                  | Antigen_Processing_and_Presentation |
| NCOA4                                      | Nuclear receptor coactivator 4           | HGNC:767                          | Elimination of N RNAi knockdown, western          | Human, mi  | Mouse emb              | NCOA4 :+ : Nuclear rec Q13772       | NCOA4_H  | 27514700 | KIR2DL3                | killer cell irCD158B2 C    | 19                                  | Antigen_Processing_and_Presentation |
| ACSL4                                      | Acyl-CoA synthetase long chain family    | HGNC:357                          | Knockdown in hi shRNA, gene transfect             | Human      | LCNaP (hu              | ACSL4 :+ : Long-chain O60488        | ACSL4_HI | 27565726 | KIR2DL4                | killer cell irCD158D G     | 19                                  | Antigen_Processing_and_Presentation |
| TP53                                       | Tumor protein p53                        | HGNC:119                          | p53 acetylation hMass spectrometry screen         | Human, mi  | H1299 cell             | TP53 :+ : SLCellular tur P04637     | P53_HUM  | 27705786 | KIR2DS1                | killer cell irCD158H C     | 19                                  | Antigen_Processing_and_Presentation |
| SAT1                                       | Spermidine/spermine N1-acetyltransferase | HGNC:105                          | p53-mediated act qRT-PCR, siRNA, CR               | Human, mi  | H1299, U2              | SAT1 :+ : ADiamine ac P21673        | SAT1_HU  | 27698118 | KIR2DS3                | killer cell irNKAT7        | 19                                  | Antigen_Processing_and_Presentation |
| ALOX15                                     | Arachidonate 15-lipoxygenase             | HGNC:433                          | SAT1- and ROS-Cell death count, qRT-              | Human      | H1299, U2              | ALOX15 :+ : Arachidona P16050       | LOX15_HI | 27698118 | KIR2DS4                | killer cell irCD158I KI    | 19                                  | Antigen_Processing_and_Presentation |
| ACSL4                                      | Acyl-CoA synthetase long chain family    | HGNC:357                          | Inhibition of AC Cell death count, LC-M           | Mice       | Mouse emb              | ACSL4 :+ : Long-chain O60488        | ACSL4_HI | 27842066 | KIR2DS5                | killer cell irCD158G N     | 19                                  | Antigen_Processing_and_Presentation |
| LPCAT3                                     | Lysophosphatidylcholine acyltransferase  | HGNC:302                          | Knockdown of L shRNA                              | Mice       | Mouse lung             | LPCAT3 :+ : Lysophospholipid P161A2 | MBOA5_H  | 27842066 | KIR3DL1                | killer cell irCD158E I     | 19                                  | Antigen_Processing_and_Presentation |
| ALOX15                                     | Arachidonate 15-lipoxygenase             | HGNC:433                          | Lipoxin-1 in Identification of oxygen             | Mice       | Kidney of              | ALOX15 :+ : Arachidona P16050       | LOX15_HI | 27842066 | KIR3DL2                | killer cell ir3DL2 CD1     | 19                                  | Antigen_Processing_and_Presentation |
| ACSL4                                      | Acyl-CoA synthetase long chain family    | HGNC:357                          | An essential protein for Cell viability, immun    | Human, mi  | Mouse emb              | ACSL4 :+ : Long-chain O60488        | ACSL4_HI | 27842070 | KLRC1                  | killer cell leCD159A N     | 12                                  | Antigen_Processing_and_Presentation |
| KEAP1                                      | Kelch like ECH associated protein 1      | HGNC:231                          | Keap1 silencing Cell viability assay, western     | Mice       | Head and n             | KEAP1 :+ : Kelch-like Q14145        | KEAP1_HI | 28012440 | KLRC2                  | killer cell leCD159c N     | 12                                  | Antigen_Processing_and_Presentation |
| EGFR                                       | Epidermal growth factor receptor         | HGNC:323                          | Cell death in acti Fluorescence-activated         | Human      | Human ma               | EGFR :+ : MEpidermal Q00533         | EGFR_HU  | 28297659 | KLRC3                  | killer cell leNKG2-E N     | 12                                  | Antigen_Processing_and_Presentation |
| NOX4                                       | NADPH oxidase 4                          | HGNC:789                          | Inhibition of NA Fluorescence-activated           | Human      | Human ma               | NOX4 :+ : INADPH ox Q9NPH5          | NOX4_HU  | 28297659 | KLRD1                  | killer cell leCD94         | 12                                  | Antigen_Processing_and_Presentation |
| MAPK3                                      | Mitogen-activated protein kinase 3       | HGNC:687                          | Inhibiting EGFR Immunoblots, luciferase           | Human      | Human ma               | MAPK :+ : CMitogen-ac P27361        | MK03_HU  | 28297659 | LTA                    | lymphotoxin LT TNFB T      | 6                                   | Antigen_Processing_and_Presentation |
| MAPK1                                      | Mitogen-activated protein kinase 1       | HGNC:687                          | Inhibiting EGFR Immunoblots, luciferase           | Human      | Human ma               | MAPK :+ : CMitogen-ac P28482        | MK01_HU  | 28297659 | CIITA                  | class II major C2TA CIIT   | 16                                  | Antigen_Processing_and_Presentation |
| BID                                        | BH3 interacting domain death agonist     | HGNC:105                          | BID deletion pre-Cell viability, western          | Mice       | HT-22 cells            | BID :+ : FerBH3-interact P55957     | BID_HUM  | 28384611 | MICA                   | MHC class MIC-A PEI        | 6                                   | Antigen_Processing_and_Presentation |
| ACSL4                                      | Acyl-CoA synthetase long chain family    | HGNC:357                          | Knockout of Acs CRISPR/Cas9, western              | Human, mi  | NIH3T3,                | ACSL4 :+ : Long-chain O60488        | ACSL4_HI | 28551825 | MICB                   | MHC class MIC-B 1.2        | 6                                   | Antigen_Processing_and_Presentation |
| ZEB1                                       | Zinc finger E-box binding homeobox       | HGNC:116                          | Knockout of ZEB1 sgRNA, cell viability            | Human      | KP4 pancre             | ZEB1 :+ : LZinc finger P37275       | ZEB1_HU  | 28678785 | NFYA                   | nuclear transcrib CBF-A CB | 6                                   | Antigen_Processing_and_Presentation |
| KEAP1                                      | Kelch like ECH associated protein 1      | HGNC:231                          | Keap1 inhibition Cell viability analysis          | Human, rat | F98, U87 g             | KEAP1 :+ : Kelch-like Q14145        | KEAP1_HI | 28805788 | NFYB                   | nuclear transcrib CBF-A CB | 12                                  | Antigen_Processing_and_Presentation |
| DPP4                                       | Dipeptidyl peptidase 4                   | HGNC:300                          | Required for ferr Cell death, RNAi, western       | Human, mi  | TP53-/-                | HCDPP4 :+ : LDipeptidyl P27487      | DPP4_HUM | 28813679 | NFYC                   | nuclear transcrib CBF-C CB | 1                                   | Antigen_Processing_and_Presentation |
| ALOX15                                     | Arachidonate 15-lipoxygenase             | HGNC:433                          | Suppression of ferr siRNA, transfection, western  | Human      | HT1080, P              | ALOX15 :+ : Arachidona P16050       | LOX15_HI | 28837253 | LGMN                   | legumain AEP LGM           | 14                                  | Antigen_Processing_and_Presentation |
| ALOX12                                     | Arachidonate 12-lipoxygenase, 12S type   | HGNC:429                          | 12-LOX inhibition siRNA, transfection, western    | Human      | HT1080, P              | ALOX12 :+ : Arachidona P18054       | LOX12_HI | 28837253 | PSMB8                  | proteasome ALDD D6S        | 6                                   | Antigen_Processing_and_Presentation |
| CDKN2A                                     | Cyclin dependent kinase inhibitor 2A     | HGNC:178                          | Combination of RNAi, immunoblot, phospho          | Human, mi  | H1299, Sac             | CDKN2A : Cyclin-dep P42771          | CDN2A_H  | 28985506 | PSMC1                  | proteasome P26S4 S4p       | 14                                  | Antigen_Processing_and_Presentation |
| PEBP1                                      | Phosphatidylethanolamine binding protein | HGNC:863                          | Elevated levels of P Western blot, siRNA, western | Human, mi  | HK2, HAE               | (PEBP1/15.Phosphatidyl P30086       | PEBP1_HI | 29053969 | PSMC2                  | proteasome MBS1 Nbla       | 7                                   | Antigen_Processing_and_Presentation |
| SOCS1                                      | Suppressor of cytokine signaling 1       | HGNC:193                          | Expression of SC Cell death assay, cell viability | Human      | U2OS or                | INSOCS1 :+ : Suppressor O15524      | SOCS1_HU | 29081404 | PSMC3                  | proteasome TBPI            | 11                                  | Antigen_Processing_and_Presentation |
| CDO1                                       | Cysteine dioxygenase type 1              | HGNC:179                          | CDO1 suppressor siRNA, western blot, immun        | Human      | Gastric can            | CDO1 :+ : GCysteine di Q16878       | CDO1_HU  | 29144989 | PSMC4                  | proteasome MIP224 RP       | 19                                  | Antigen_Processing_and_Presentation |
| MYB                                        | MYB proto-oncogene, transcription factor | HGNC:754                          | Erastin-induced f Western blot, siRNA, western    | Human      | Gastric can            | MYB :+ : CTranscripti P10242        | MYB_HUM  | 29144989 | PSMC5                  | proteasome S8 SUG-1 S      | 17                                  | Antigen_Processing_and_Presentation |
| HMOX1                                      | Heme oxygenase 1                         | HGNC:501                          | Inhibiting HO-1 Cell viability assay, qRT         | Human      | MDA-MB-                | HMOX1 :+ : Heme oxyg P09601         | HMOX1_H  | 29274359 | PSMC6                  | proteasome SUG2 p42        | 14                                  | Antigen_Processing_and_Presentation |
| MAPK8                                      | Mitogen-activated protein kinase 8       | HGNC:688                          | JNK1/2 inhibitor.MitoSOX probe, luminescence      | Rat        | PC12 cells             | MAPK8 :+ : Mitogen-ac P45983        | MK08_HU  | 29330409 | PSMD1                  | proteasome P112 Rpn2       | 2                                   | Antigen_Processing_and_Presentation |
| MAPK9                                      | Mitogen-activated protein kinase 9       | HGNC:688                          | JNK1/2 inhibitor.MitoSOX probe, luminescence      | Rat        | PC12 cells             | MAPK9 :+ : Mitogen-ac P45984        | MK09_HU  | 29330409 | PSMD2                  | proteasome P97 RPN1 S      | 3                                   | Antigen_Processing_and_Presentation |
| MAPK1                                      | Mitogen-activated protein kinase 1       | HGNC:687                          | ERK1/2 inhibitor.MitoSOX probe, luminescence      | Rat        | PC12 cells             | MAPK1 :+ : Mitogen-ac P28482        | MK01_HU  | 29330409 | PSMD3                  | proteasome P58 RPN3 S      | 17                                  | Antigen_Processing_and_Presentation |
| MAPK3                                      | Mitogen-activated protein kinase 3       | HGNC:687                          | ERK1/2 inhibitor.MitoSOX probe, luminescence      | Rat        | PC12 cells             | MAPK3 :+ : Mitogen-ac P27361        | MK03_HU  | 29330409 | PSMD4                  | proteasome AF AF-1 A       | 9                                   | Antigen_Processing_and_Presentation |
| SLC1A5                                     | Solute carrier family 1 member 5         | HGNC:109                          | Overexpression cCell viability assay, lip         | Human      | Melanoma               | SLC1A5 :+ : Neutral ami Q15758      | AAAT_HU  | 29348676 | PSMD5                  | proteasome S5B             | 9                                   | Antigen_Processing_and_Presentation |
| CHAC1                                      | Chac glutathione specific gamma-glutamyl | HGNC:286                          | CHAC1 degradation Western blot, real-time         | Human      | MDA-MB-                | CHAC1 :+ : Glutathione Q9BUX1       | CHAC1_H  | 29383104 | PSMD7                  | proteasome MOV34 P4        | 16                                  | Antigen_Processing_and_Presentation |
| MAPK14                                     | Mitogen-activated protein kinase 14      | HGNC:687                          | Ferroptosis was fCell viability assay, lip        | Mice       | TM4 Serto              | MAPK14 :+ : Mitogen-ac Q16539       | MK14_HU  | 29436589 | PSMD8                  | proteasome HEL-S-91n       | 19                                  | Antigen_Processing_and_Presentation |
| LINC00472                                  | Long intergenic non-protein coding RNA   | HGNC:213                          | Increases erastin-Bisulfite sequencing, RNA       | Human      | Lung cance             | LINC00472 Putative un Q9H8W2        | CF155_HU | 29588351 | PSMD10                 | proteasome dJ889N15.2 X    |                                     | Antigen_Processing_and_Presentation |
| NOX4                                       | NADPH oxidase 4                          | HGNC:789                          | Activated Nox4 Western blot, LDH release          | Human, rat | Rat C6, hu             | NOX4 :+ : INADPH ox Q9NPH5          | NOX4_HU  | 29702192 | PSMD11                 | proteasome Rpn6 S9 p4      | 17                                  | Antigen_Processing_and_Presentation |
| GOT1                                       | Glutamic-oxaloacetic transaminase 1      | HGNC:443                          | Overexpression cImmunoblotting, luciferase        | Human      | A375 and               | GOT1 :+ : aAspartate a P17174       | AATC_HU  | 30035324 | PSMD13                 | proteasome HSPC027 F       | 11                                  | Antigen_Processing_and_Presentation |
| BECN1                                      | Beclin 1                                 | HGNC:103                          | Knockdown in hi shRNA, western blot, immun        | Human, mi  | HCT116,                | BECN1 :+ : Beclin-1 Q14457          | BECN1_HI | 30057310 | PSME1                  | proteasome HEL-S-129       | 14                                  | Antigen_Processing_and_Presentation |
| PRKAA2                                     | Protein kinase AMP-activated catalytic   | HGNC:937                          | Inhibition of PRK siRNA, western blot, c          | Human      | HCT116 an              | PRKAA2 :+ : 5'-AMP-act P54646       | AAPK2_HI | 30057310 | PSME1                  | proteasome HEL-S-129       | 14                                  | Antigen_Processing_and_Presentation |
| PRKAA1                                     | Protein kinase AMP-activated catalytic   | HGNC:937                          | Inhibition of PRK siRNA, western blot, c          | Human      | HCT116 an              | PRKAA1 :+ : 5'-AMP-act Q13131       | AAPK1_HI | 30057310 | PSME2                  | proteasome PA28B PA        | 14                                  | Antigen_Processing_and_Presentation |
| ELAVL1                                     | ELAV like RNA binding protein 1          | HGNC:331                          | ELAVL1 siRNA Immunohistochemistry                 | Human, mi  | Human live             | ELAVL1 :+ : ELAV-like Q15717        | ELAV1_HI | 30081711 | PSME2                  | proteasome PA28B PA        | 14                                  | Antigen_Processing_and_Presentation |
| BAP1                                       | BRCA1 associated protein 1               | HGNC:950                          | Suppresses SLC7 Flow cytometry, cell viability    | Human      | HEK-293T               | BAP1 :+ : SIUbiquitin c: Q92560     | BAP1_HU  | 30202049 | RELB                   | RELB prot I-REL IMD        | 19                                  | Antigen_Processing_and_Presentation |
| TP53                                       | Tumor protein p53                        | HGNC:119                          | Facilitates ART-i Western blot, immunoflu         | Rat        | Hepatic ste            | TP53 :+ : FCellular tur P04637      | P53_HUM  | 30321484 | RFX5                   | regulatory f-              | 1                                   | Antigen_Processing_and_Presentation |
| ABCC1                                      | ATP binding cassette subfamily C member  | HGNC:51                           | Accelerates ferro Western blot, GSH assay         | Human      | HAP1, H12              | ABCC1 :+ : Multidrug r P33527       | MRP1_HU  | 30726737 | RFXAP                  | regulatory f-              | 13                                  | Antigen_Processing_and_Presentation |
| ACSL4                                      | Acyl-CoA synthetase long chain family    | HGNC:357                          | Inhibition suppressor siRNA, western blot, immun  | Human, mi  | Male C57B              | ACSL4 :+ : Long-chain O60488        | ACSL4_HI | 30737476 | SLC10A2                | solute carrier ASBT IBA    | 13                                  | Antigen_Processing_and_Presentation |
| MIR6852                                    | microRNA 6852                            | HGNC:499                          | Promotes ferro qRT-PCR, gene knock                | Human      | A549 and               | SMIR6852 :+ : NA NA                 |          | 30787392 | TAP1                   | transporter ABC17 AB       | 6                                   | Antigen_Processing_and_Presentation |
| ACVR1B                                     | Activin A receptor type 1B               | HGNC:172                          | Inhibition attenuat Western blot, siRNA, immun    | Human      | HK-2 cells             | ACVR1B :+ : Activin rec P36896      | ACVR1B_H | 30804470 | TAP2                   | transporter ABC18 AB       | 6                                   | Antigen_Processing_and_Presentation |





|                 |                                                        |          |                     |    |            |    |                 |                          |          |          |          |                                              |    |                |
|-----------------|--------------------------------------------------------|----------|---------------------|----|------------|----|-----------------|--------------------------|----------|----------|----------|----------------------------------------------|----|----------------|
| PEX10           | peroxisomal biogenesis factor 10                       | HGNC:885 | Genome-wide CI      | NA | Human, mi  | NA | PEX10           | +: NA                    | NA       | 32939090 | DEFA1    | defensin al DEF1 DEF                         | 8  | Antimicrobials |
| KEAP1           | kelch like ECH associated protein 1                    | HGNC:231 | NA                  | NA | Human      | NA | KEAP1           | +: NA                    | NA       | 32939090 | TMSB10   | thymosin b MIG12 TB                          | 2  | Antimicrobials |
| AGPAT3          | 1-acylglycerol-3-phosphate O-acyltransferase           | HGNC:326 | NA                  | NA | Human      | NA | AGPAT3          | :- NA                    | NA       | 32939090 | DEFA6    | defensin al DEF6 HD-6                        | 8  | Antimicrobials |
| PEX12           | peroxisomal biogenesis factor 12                       | HGNC:885 | Genome-wide CI      | NA | Human      | NA | PEX12           | +: NA                    | NA       | 32939090 | DEFA5    | defensin al DEF5 HD-5                        | 8  | Antimicrobials |
| CHP1            | calcineurin like EF-hand protein 1                     | HGNC:174 | NA                  | NA | Human      | NA | CHP1            | +: F NA                  | NA       | 32939090 | DEFA4    | defensin al DEF4 HNP                         | 8  | Antimicrobials |
| GPAT4           | glycerol-3-phosphate acyltransferase 4                 | HGNC:208 | NA                  | NA | Human      | NA | AGPAT6          | :- NA                    | NA       | 32939090 | LCN2     | lipocalin 2 24p3 MSFI                        | 9  | Antimicrobials |
| BRPF1           | bromodomain and PHD finger containing protein 1        | HGNC:142 | NA                  | NA | Human      | NA | BRPF1           | +: NA                    | NA       | 32939090 | LCN1     | lipocalin 1 PMFA TLC                         | 9  | Antimicrobials |
| OSBPL9          | oxysterol binding protein like 9                       | HGNC:163 | NA                  | NA | Human      | NA | OSBPL9          | +: NA                    | NA       | 32939090 | COLEC10  | collectin subunit 3 MC3 CL-10                | 8  | Antimicrobials |
| INTS2           | integrator complex subunit 2                           | HGNC:292 | NA                  | NA | Human      | NA | INTS2           | +: I NA                  | NA       | 32939090 | BPI      | bactericidal permeability-increasing protein | 20 | Antimicrobials |
| MMD             | monocyte to macrophage differentiation factor 1        | HGNC:715 | NA                  | NA | Human      | NA | MMD             | +: F NA                  | NA       | 32939090 | S100A9   | S100 calcium binding protein A9              | 1  | Antimicrobials |
| CYP4F8          | cytochrome P450 family 4 subfamily 8 member A          | HGNC:264 | NA                  | NA | Human      | NA | CYP4F8          | +: NA                    | NA       | 32939090 | S100A8   | S100 calcium binding protein A8              | 1  | Antimicrobials |
| MLLT1           | MLLT1 super elongation complex subunit 1               | HGNC:713 | NA                  | NA | Human      | NA | MLLT1           | +: NA                    | NA       | 32939090 | DCD      | dermcidin AIDD DCE                           | 12 | Antimicrobials |
| TPA             | alpha tocopherol transfer protein                      | HGNC:124 | NA                  | NA | Human      | NA | TPA             | +: F NA                  | NA       | 32939090 | LCN6     | lipocalin 6 LCN5 UNC                         | 9  | Antimicrobials |
| GRIA3           | glutamate ionotropic receptor AMPA receptor subunit 3  | HGNC:457 | NA                  | NA | Human      | NA | GRIA3           | +: NA                    | NA       | 32939090 | S100A12  | S100 calcium binding protein A12             | 1  | Antimicrobials |
| EPT1            | erythrocyte protein tyrosine phosphatase 1             | NA       | NA                  | NA | Human      | NA | EPT1            | +: F NA                  | NA       | 32939090 | HTN3     | histatin 3 HIS2 HTN3                         | 4  | Antimicrobials |
| POM121L1        | POM121 transmembrane nucleoporin 1                     | HGNC:253 | NA                  | NA | Human      | NA | POM121L1        | NA                       | NA       | 32939090 | LCN8     | lipocalin 8 EP17 LCN8                        | 9  | Antimicrobials |
| LIG3            | DNA ligase 3                                           | HGNC:660 | NA                  | NA | Human, mi  | NA | LIG3            | +: F NA                  | NA       | 32939090 | DEFA1B   | defensin al HNP-1 HP-1                       | 8  | Antimicrobials |
| AEBP2           | AE binding protein 2                                   | HGNC:240 | NA                  | NA | Human      | NA | AEBP2           | +: NA                    | NA       | 32939090 | CCR10    | C-C motif chemokine receptor 10              | 17 | Antimicrobials |
| AGPS            | alkylglycerone phosphate synthase                      | HGNC:327 | Genome-wide CI      | NA | Human      | NA | AGPS            | +: P NA                  | NA       | 32939090 | CELA1    | chymotrypsin-like elastase 1                 | 12 | Antimicrobials |
| CDC43           | cell division cycle associated 3                       | HGNC:146 | NA                  | NA | Human      | NA | CDC43           | +: NA                    | NA       | 32939090 | DEFB106A | defensin beta BD-6 DEFB106A                  | 8  | Antimicrobials |
| PEX2            | peroxisomal biogenesis factor 2                        | HGNC:971 | Genome-wide CI      | NA | Human      | NA | PEX2            | +: P NA                  | NA       | 32939090 | PENK     | proenkephalin A PENK-1                       | 8  | Antimicrobials |
| LPCAT3          | lysophosphatidylcholine acyltransferase 3              | HGNC:302 | NA                  | NA | Human      | NA | LPCAT3          | +: NA                    | NA       | 32939090 | BPIFC    | BPI fold co BPIL2                            | 22 | Antimicrobials |
| PEX6            | peroxisomal biogenesis factor 6                        | HGNC:885 | NA                  | NA | Human      | NA | PEX6            | +: F NA                  | NA       | 32939090 | MMP12    | matrix metalloproteinase 12                  | 11 | Antimicrobials |
| TIMM9           | translocase of inner mitochondrial membrane 9          | HGNC:118 | NA                  | NA | Human      | NA | TIMM9           | +: NA                    | NA       | 32939090 | BPIFB6   | BPI fold co BPIL3 LPL                        | 20 | Antimicrobials |
| DCAF7           | DDB1 and CUL4 associated factor 7                      | HGNC:309 | NA                  | NA | Human      | NA | DCAF7           | +: NA                    | NA       | 32939090 | LEAP2    | liver-enriched chemokine 2                   | 5  | Antimicrobials |
| LCE2C           | late cornified envelope 2C                             | HGNC:294 | NA                  | NA | Human      | NA | LCE2C           | +: NA                    | NA       | 32939090 | SFTPD    | surfactant protein C OLEC7 P                 | 10 | Antimicrobials |
| FAR1            | fatty acyl-CoA reductase 1                             | HGNC:262 | Genome-wide CI      | NA | Human      | NA | FAR1            | +: P NA                  | NA       | 32939090 | LCN9     | lipocalin 9 HEL129                           | 9  | Antimicrobials |
| PHF21A          | PHD finger protein 21A                                 | HGNC:241 | NA                  | NA | Human      | NA | PHF21A          | +: NA                    | NA       | 32939090 | BPIFB2   | BPI fold co BPIL1 C20                        | 20 | Antimicrobials |
| SMAD7           | SMAD family member 7                                   | HGNC:677 | NA                  | NA | Human      | NA | SMAD7           | +: NA                    | NA       | 32939090 | PTGDS    | prostaglandin synthase                       | 9  | Antimicrobials |
| LYRM1           | LYR motif containing 1                                 | HGNC:250 | NA                  | NA | Human      | NA | LYRM1           | +: NA                    | NA       | 32939090 | TMSB4X   | thymosin beta FX PTMB4X                      |    | Antimicrobials |
| AMN             | amnion associated transmembrane protein 1              | HGNC:146 | NA                  | NA | Human      | NA | AMN             | +: F NA                  | NA       | 32939090 | PGLYRP1  | peptidoglycan recognition protein 1          | 19 | Antimicrobials |
| PEX3            | peroxisomal biogenesis factor 3                        | HGNC:885 | Genome-wide CI      | NA | Human      | NA | PEX3            | +: P NA                  | NA       | 32939090 | ZC3HAV1  | zinc finger ARTD13 F                         | 7  | Antimicrobials |
| MTCH1           | mitochondrial carrier 1                                | HGNC:175 | NA                  | NA | Human      | NA | MTCH1           | +: NA                    | NA       | 32939090 | TMSB15A  | thymosin beta TMSB15 T X                     |    | Antimicrobials |
| ZEB1            | zinc finger E-box binding homeobox 1                   | HGNC:116 | CDH1 silencing c    | NA | Human, mi  | NA | ZEB1            | +: F NA                  | NA       | 32896720 | S100B    | S100 calcium binding protein B               | 21 | Antimicrobials |
| SIRT1           | sirtuin 1                                              | HGNC:149 | Histone deacetylase | NA | Human, mi  | NA | SIRT1           | +: F NA                  | NA       | 32896720 | S100A13  | S100 calcium binding protein A13             | 1  | Antimicrobials |
| ACADSB          | acyl-CoA dehydrogenase short/branched chain 1          | HGNC:91  | Overexpression c    | NA | Human      | NA | ACADSB          | NA                       | NA       | 32776663 | S100A6   | S100 calcium binding protein A6              | 1  | Antimicrobials |
| PVT1            | Pvt1 oncogene                                          | HGNC:970 | PVT1 silencing c    | NA | Human, mi  | NA | PVT1            | +: F NA                  | NA       | 32827544 | DEFB119  | defensin beta DEFB-19 C                      | 20 | Antimicrobials |
| hsa_circ_000000 | These evidences                                        | NA       | NA                  | NA | Human      | NA | hsa_circ_000000 | NA                       | NA       | 32802409 | DEFB107A | defensin beta BD-7 DEFB107A                  | 8  | Antimicrobials |
| SLC39A14        | solute carrier family 39 member 14                     | HGNC:208 | Loss of hepatic S   | NA | Mice       | NA | SLC39A14        | NA                       | NA       | 32374849 | DEFB105A | defensin beta BD-5 DEFB105A                  | 8  | Antimicrobials |
| NCOA4           | nuclear receptor coactivator 4                         | HGNC:767 | Additionally, NC    | NA | Human      | NA | NCOA4           | :- Nuclear rec Q13772    | NCOA4_H  | 32810738 | SERPIND1 | serpin family D22S673 H                      | 22 | Antimicrobials |
| MAP3K11         | mitogen-activated protein kinase kinase 3              | HGNC:685 | Inhibition of ML    | NA | Mice       | NA | MAP3K11         | Mitogen-act Q16584       | M3K11_HU | 32710001 | DEFB129  | defensin beta C20orf87 E                     | 20 | Antimicrobials |
| GSK3B           | glycogen synthase kinase 3 beta                        | HGNC:461 | Silence of GSK-3    | NA | Human      | NA | GSK3B           | +: Glycogen s P49841     | GSK3B_HU | 32642794 | DEFB127  | defensin beta C20orf73 C                     | 20 | Antimicrobials |
| MAPK8           | mitogen-activated protein kinase 8                     | HGNC:688 | Knockdown of J      | NA | Human      | NA | MAPK8           | +: Mitogen-act P45983    | MK08_HU  | 32782585 | S100P    | S100 calcium binding protein P               | 4  | Antimicrobials |
| BRD7            | bromodomain containing 7                               | HGNC:143 | Upregulated BRI     | NA | Human, mi  | NA | BRD7            | +: LBromodom Q9NPI1      | BRD7_HU  | 32863216 | S100A7   | S100 calcium binding protein A7              | 1  | Antimicrobials |
| TP53            | tumor protein p53                                      | HGNC:119 | Additionally, p53   | NA | Human, mi  | NA | TP53            | +: LiCellular tur P04637 | P53_HUM  | 32863216 | DEFB104A | defensin beta BD-4 DEFB104A                  | 8  | Antimicrobials |
| SLC25A28        | solute carrier family 25 member 28                     | HGNC:234 | As expected, shR    | NA | Human, mi  | NA | SLC25A28        | Mitoferrin- Q96A46       | MFRN2_H  | 32863216 | DEFB126  | defensin beta C20orf8 DE                     | 20 | Antimicrobials |
| ACSL4           | acyl-CoA synthetase long chain family 4 member 1       | HGNC:357 | Inhibition of ACS   | NA | Rat        | NA | ACSL4           | +: Long-chain O60488     | ACSL4_HI | 32593899 | DEFB106B | defensin beta BD-6 DEFB106B                  | 8  | Antimicrobials |
| MFN2            | mitofusin 2                                            | HGNC:168 | Thus, Mfn2 appe     | NA | Rat        | NA | MFN2            | +: 5Mitofusin-2 O95140   | MFN2_HU  | 32593899 | DEFB104B | defensin beta BD-4 DEFB104B                  | 8  | Antimicrobials |
| ACSL4           | acyl-CoA synthetase long chain family 4 member 1       | HGNC:357 | Knockdown of A      | NA | Human      | NA | ACSL4           | +: Long-chain O60488     | ACSL4_HI | 32541921 | DEFB107B | defensin beta HsT21816                       | 8  | Antimicrobials |
| SLC11A2         | solute carrier family 11 member 2                      | HGNC:109 | Overexpression c    | NA | Human      | NA | SLC11A2         | : Natural resi P49281    | NRAM2_H  | 32535745 | PGLYRP3  | peptidoglycan recognition protein 3          | 1  | Antimicrobials |
| ZFAS1           | ZNF1 antisense RNA 1                                   | HGNC:331 | lncRNA ZFAS1        | NA | Human, rat | NA | ZFAS1           | +: NA                    | NA       | 32453709 | PGLYRP2  | peptidoglycan recognition protein 2          | 19 | Antimicrobials |
| SLC38A1         | solute carrier family 38 member 1                      | HGNC:134 | Mechanistically, NA | NA | Human, rat | NA | SLC38A1         | : Sodium-cot Q9H2H9      | S38A1_HU | 32453709 | S100A10  | S100 calcium binding protein A10             | 1  | Antimicrobials |
| TSC1            | TSC complex subunit 1                                  | HGNC:123 | Haploinsufficiency  | NA | Human, mi  | NA | TSC1            | +: F Hamartin Q92574     | TSC1_HU  | 32404875 | S100A2   | S100 calcium binding protein A2              | 1  | Antimicrobials |
| PEBP1           | phosphatidylethanolamine binding protein 1             | HGNC:863 | We found that PE    | NA | Human      | NA | PEBP1           | +: Phosphatid P30086     | PEBP1_HU | 32513718 | DEFB125  | defensin beta DEFB-25                        | 20 | Antimicrobials |
| TGFB1           | transforming growth factor beta 1                      | HGNC:117 | Therefore, PLC/E    | NA | Human      | NA | TGFB1           | :- Transformin P01137    | TGFB1_HI | 32471991 | DEFB123  | defensin beta DEFB-23 E                      | 20 | Antimicrobials |
| SNCA            | synuclein alpha                                        | HGNC:111 | Alpha synuclein     | NA | Human      | NA | SNCA            | +: IAlpha-synu P37840    | SYUA_HU  | 32341450 | DEFB105B | defensin beta BD-5 DEFB105B                  | 8  | Antimicrobials |
| SIRT3           | sirtuin 3                                              | HGNC:149 | SIRT3 deficiency    | NA | Human, poi | NA | SIRT3           | :- GNAD-depe Q9NTG7      | SIR3_HU  | 32329068 | DEFB132  | defensin beta BD-32 DEFB132                  | 20 | Antimicrobials |
| PRKAA2          | protein kinase AMP-activated catalytic subunit alpha 2 | HGNC:937 | Suppression of A    | NA | Human, poi | NA | PRKAA2          | :- 5'-AMP-act P54646     | AAPK2_H  | 32329068 | BPIFB3   | BPI fold co C20orf185                        | 20 | Antimicrobials |
| TFRC            | transferrin receptor                                   | HGNC:117 | Knockdown of T      | NA | Human      | NA | TFRC            | +: FTransferrin P02786   | TFR1_HU  | 32283255 | LCN12    | lipocalin 12-                                | 9  | Antimicrobials |
| CGAS            | cyclic GMP-AMP synthase                                | HGNC:213 | The CGAS-STIN       | NA | Human      | NA | CGAS            | +: NCyclic GM Q8N884     | CGAS_HU  | 32186434 | PGLYRP4  | peptidoglycan recognition protein 4          | 1  | Antimicrobials |

|        |                                        |          |                    |       |    |                         |        |          |          |          |               |            |    |                |
|--------|----------------------------------------|----------|--------------------|-------|----|-------------------------|--------|----------|----------|----------|---------------|------------|----|----------------|
| STING1 | stimulator of interferon response cGAS | HGNC:279 | The CGAS-STING1    | Human | NA | STING1 :+ Stimulator of | Q86WV6 | STING_HU | 32186434 | S100A11  | S100 calicium | HEL-S-43   | 1  | Antimicrobials |
| HDDC3  | HD domain containing 3                 | HGNC:305 | Ferroptosis-induc  | Human | NA | HDDC3 :-: Guanosine-    | Q8N4P3 | MESH1_H  | 32462112 | S100A5   | S100 calicium | S100D      | 1  | Antimicrobials |
| MIR761 | microRNA 761                           | HGNC:373 | Additionally, circ | Human | NA | MIR761 :-: NA           | NA     | NA       | 32196629 | S100A3   | S100 calicium | S100E      | 1  | Antimicrobials |
| MDM2   | MDM2 proto-oncogene                    | HGNC:697 | MDM2 and MDM       | Human | NA | MDM2 :+: E3 ubiquitin   | Q00987 | MDM2_HU  | 32079652 | S100A1   | S100 calicium | S100 S100- | 1  | Antimicrobials |
| MDM4   | MDM4 regulator of p53                  | HGNC:697 | MDM2 and MDM       | Human | NA | MDM4 :+: Protein Md     | O15151 | MDM4_HU  | 32079652 | DEFB128  | defensin be   | DEFB-28 E  | 20 | Antimicrobials |
| ALOX15 | arachidonate 15-lipoxygenase           | HGNC:433 | Indeed, knocking   | Mice  | NA | ALOX15 :-: Polyunsatur  | P16050 | LOX15_HU | 32080625 | DEFB108B | defensin be   | DEFB-8 hB  | 11 | Antimicrobials |
| POR    | cytochrome p450 oxidoreductase         | HGNC:920 | These data indica  | Human | NA | POR :+: LijNADPH--c     | P16435 | NCPR_HU  | 32080622 | HTN1     | histatin 1    | HIS1       | 4  | Antimicrobials |
| MIR214 | microRNA 214                           | HGNC:315 | MicroRNA-214-      | Human | NA | miR-214 :+ NA           | NA     | NA       | 31960438 | LMBR1L   | limb develc   | LIMR       | 12 | Antimicrobials |
| DLD    | dihydrolipoamide dehydrogenase         | HGNC:289 | DLD links to ferr  | Human | NA | DLD :+: LiDihydrolip    | P09622 | DLDH_HU  | 31931284 | S100A7A  | S100 calicium | NICE-2 NI  | 1  | Antimicrobials |
| LONP1  | lon peptidase 1, mitochondrial         | HGNC:947 | Inhibition of LO   | Human | NA | LONP1 :-: (Lon proteas  | P36776 | LONM_HU  | 31822343 | DEFB118  | defensin be   | C20orf63 E | 20 | Antimicrobials |
| ACSL4  | acyl-CoA synthetase long chain famil   | HGNC:357 | ACSL4 suppress     | Human | NA | ACSL4 :-: (Long-chain   | O60488 | ACSL4_HU | 31789401 | COLEC12  | collectin su  | CLP1 NSR   | 18 | Antimicrobials |
| BACH1  | BTB domain and CNC homolog 1           | HGNC:935 | These results sho  | Mice  | NA | BACH1 :-: Transcriptic  | O14867 | BACH1_H  | 31740582 | TMSB4Y   | thymosin b    | TB4Y       | Y  | Antimicrobials |
| DNAJB6 | DnaJ heat shock protein family (Hsp4   | HGNC:148 | DNAJB6 Promot      | Human | NA | DNAJB6a :DnaJ homo      | O75190 | DNJB6_HU | 31701262 | DEFB131A | defensin be   | DEFB-31 E  | 4  | Antimicrobials |
| WWTR1  | WW domain containing transcription     | HGNC:240 | TAZ removal cor    | Human | NA | WWTR1 :+WW domai        | Q9GZV5 | WWTR1_H  | 31641008 | DEFB134  | defensin be - |            | 8  | Antimicrobials |
| SIRT1  | sirtuin 1                              | HGNC:149 | Intestinal SIRT1   | Mice  | NA | SIRT1 :+: FNAD-deper    | Q96EB6 | SIR1_HUM | 31610175 | DEFB130A | defensin be   | DEFB-30 E  | 8  | Antimicrobials |
| ATM    | ATM serine/threonine kinase            | HGNC:795 | Taken together, v  | Human | NA | ATM :-: FPSerine-prot   | Q13315 | ATM_HUM  | 31320750 | DEFB124  | defensin be   | DEFB-24    | 20 | Antimicrobials |
| PRKCA  | protein kinase C alpha                 | HGNC:939 | Similarly, genetic | Human | NA | PRKCA :+:Protein kin    | P17252 | KPCA_HU  | 31173656 | DEFB121  | defensin be   | DEFB21 E   | 20 | Antimicrobials |
|        |                                        |          |                    |       |    |                         |        |          |          | DEFB116  | defensin be   | DEFB-16    | 20 | Antimicrobials |
|        |                                        |          |                    |       |    |                         |        |          |          | DEFB115  | defensin be   | DEFB-15    | 20 | Antimicrobials |
|        |                                        |          |                    |       |    |                         |        |          |          | DEFB114  | defensin be   | DEFB-14 E  | 6  | Antimicrobials |
|        |                                        |          |                    |       |    |                         |        |          |          | DEFB113  | defensin be   | DEFB-13    | 6  | Antimicrobials |
|        |                                        |          |                    |       |    |                         |        |          |          | DEFB112  | defensin be   | DEFB-12    | 6  | Antimicrobials |
|        |                                        |          |                    |       |    |                         |        |          |          | DEFB110  | defensin be   | DEFB-10 E  | 6  | Antimicrobials |
|        |                                        |          |                    |       |    |                         |        |          |          | TMSB15B  | thymosin b    | TMSB15A X  |    | Antimicrobials |
|        |                                        |          |                    |       |    |                         |        |          |          | DEFB133  | defensin be - |            | 6  | Antimicrobials |
|        |                                        |          |                    |       |    |                         |        |          |          | S100Z    | S100 calicium | Gm625 S1C  | 5  | Antimicrobials |
|        |                                        |          |                    |       |    |                         |        |          |          | MAVS     | mitochondr    | CARDIF IF  | 20 | Antimicrobials |
|        |                                        |          |                    |       |    |                         |        |          |          | TMSB4XP  | TMSB4X p      | TMSL3      | 4  | Antimicrobials |
|        |                                        |          |                    |       |    |                         |        |          |          | S100A14  | S100 calicium | BCMP84 S   | 1  | Antimicrobials |
|        |                                        |          |                    |       |    |                         |        |          |          | LCN10    | lipocalin 1C- |            | 9  | Antimicrobials |
|        |                                        |          |                    |       |    |                         |        |          |          | S100A16  | S100 calicium | AAG13 DT   | 1  | Antimicrobials |
|        |                                        |          |                    |       |    |                         |        |          |          | DEFB136  | defensin be   | DEFB137    | 8  | Antimicrobials |
|        |                                        |          |                    |       |    |                         |        |          |          | DEFB135  | defensin be   | DEFB136    | 8  | Antimicrobials |
|        |                                        |          |                    |       |    |                         |        |          |          | DEFB117  | defensin be   | DEFB-17    | 20 | Antimicrobials |
|        |                                        |          |                    |       |    |                         |        |          |          | DEFB110  | defensin be   | DEFB-10 E  | 6  | Antimicrobials |
|        |                                        |          |                    |       |    |                         |        |          |          | ZC3HAV1  | zinc finger   | C7orf39    | 7  | Antimicrobials |
|        |                                        |          |                    |       |    |                         |        |          |          | S100A7L2 | S100 calicium | S100a7b    | 1  | Antimicrobials |
|        |                                        |          |                    |       |    |                         |        |          |          | MBL3P    | mannose-bi    | COLEC2 M   | 10 | Antimicrobials |
|        |                                        |          |                    |       |    |                         |        |          |          | DEFB4B   | defensin be   | DEFB4P     | 8  | Antimicrobials |
|        |                                        |          |                    |       |    |                         |        |          |          | BPIFB4   | BPI fold co   | C20orf186  | 20 | Antimicrobials |
|        |                                        |          |                    |       |    |                         |        |          |          | IFNAR1   | interferon a  | AVP IFN-a  | 21 | Antimicrobials |
|        |                                        |          |                    |       |    |                         |        |          |          | AZU1     | azurocidin    | AZAMP A    | 19 | Antimicrobials |
|        |                                        |          |                    |       |    |                         |        |          |          | DEFB131B | defensin be - |            | 11 | Antimicrobials |
|        |                                        |          |                    |       |    |                         |        |          |          | DEFA1A3  | defensin al   | DEFA1 DE   | 8  | Antimicrobials |
|        |                                        |          |                    |       |    |                         |        |          |          | LCN1P1   | lipocalin 1   | LCN1L1 b   | 9  | Antimicrobials |
|        |                                        |          |                    |       |    |                         |        |          |          | S100G    | S100 calicium | CABP CAE X |    | Antimicrobials |
|        |                                        |          |                    |       |    |                         |        |          |          | DEFA7P   | defensin al   | DEFA7      | 8  | Antimicrobials |
|        |                                        |          |                    |       |    |                         |        |          |          | DEFB130B | defensin be - |            | 8  | Antimicrobials |
|        |                                        |          |                    |       |    |                         |        |          |          | DEFB108F | defensin be   | DEFB108P   | 4  | Antimicrobials |
|        |                                        |          |                    |       |    |                         |        |          |          | DEFB131C | defensin be - |            | 8  | Antimicrobials |
|        |                                        |          |                    |       |    |                         |        |          |          | TCHHL1   | trichohyalin  | S100A17 T  | 1  | Antimicrobials |
|        |                                        |          |                    |       |    |                         |        |          |          | TINAGL1  | tubulointer   | ARG1 LCN   | 1  | Antimicrobials |
|        |                                        |          |                    |       |    |                         |        |          |          | IFNGR1   | interferon g  | CD119 IFN  | 6  | Antimicrobials |
|        |                                        |          |                    |       |    |                         |        |          |          | SLC22A17 | solute carri  | 24p3R BOC  | 14 | Antimicrobials |
|        |                                        |          |                    |       |    |                         |        |          |          | WFIKKN1  | WAP, follis   | C16orf12 R | 16 | Antimicrobials |
|        |                                        |          |                    |       |    |                         |        |          |          | WFDC2    | WAP four-(    | EDDM4 HI   | 20 | Antimicrobials |
|        |                                        |          |                    |       |    |                         |        |          |          | IL6      | interleukin   | BSF-2 BSF  | 7  | Antimicrobials |
|        |                                        |          |                    |       |    |                         |        |          |          | UMODL1   | uromodulin-   |            | 21 | Antimicrobials |
|        |                                        |          |                    |       |    |                         |        |          |          | TGFB1    | transformin   | CED DPD1   | 19 | Antimicrobials |
|        |                                        |          |                    |       |    |                         |        |          |          | PF4V1    | platelet fact | CXCL4L1    | 4  | Antimicrobials |

|         |                |             |    |                |
|---------|----------------|-------------|----|----------------|
| MMP9    | matrix metz    | CLG4B GE    | 20 | Antimicrobials |
| ANOS1   | anosmin 1      | ADMLX H X   |    | Antimicrobials |
| TLR4    | toll like rec  | ARMD10 C    | 9  | Antimicrobials |
| IFNG    | interferon g   | IFG IFI     | 12 | Antimicrobials |
| SPAG11B | sperm asso     | EDDM2B I    | 8  | Antimicrobials |
| A2M     | alpha-2-ma     | A2MD CP/    | 12 | Antimicrobials |
| CTSL    | cathepsin L    | CATL CTS    | 9  | Antimicrobials |
| NFKB1   | nuclear fact   | CVID12 EF   | 4  | Antimicrobials |
| APOBEC3 | apolipoprot    | A3G ARCI    | 22 | Antimicrobials |
| FABP6   | fatty acid b   | I-15P I-BA  | 5  | Antimicrobials |
| NOD2    | nucleotide l   | ACUG BL/    | 16 | Antimicrobials |
| MBL2    | mannose bi     | COLEC1 H    | 10 | Antimicrobials |
| SFTP A1 | surfactant p   | COLEC4 P    | 10 | Antimicrobials |
| RBP1    | retinol bind   | CRABP-I C   | 3  | Antimicrobials |
| TLR2    | toll like rec  | CD282 TIL   | 4  | Antimicrobials |
| SLC40A1 | solute carri   | FPN1 HFE/   | 2  | Antimicrobials |
| PLAU    | plasminoge     | ATF BDPL    | 10 | Antimicrobials |
| IL1B    | interleukin    | IL-1 IL1-B  | 2  | Antimicrobials |
| PAEP    | progesterag    | GD GdA G/   | 9  | Antimicrobials |
| HJV     | hemojuveli     | HFE2 HFE/   | 1  | Antimicrobials |
| MUC5AC  | mucin 5AC      | MUC5 TBM    | 11 | Antimicrobials |
| CTSS    | cathepsin S-   |             | 1  | Antimicrobials |
| OBP2A   | odorant bin    | LCN13 OB    | 9  | Antimicrobials |
| PLTP    | phospholipi    | BPIFE HDI   | 20 | Antimicrobials |
| MX1     | MX dynam       | IFI-78K IFI | 21 | Antimicrobials |
| DDX58   | DEXD/H-b       | RIG-I RIG1  | 9  | Antimicrobials |
| IFNL1   | interferon l   | IL-29 IL29  | 19 | Antimicrobials |
| IRF3    | interferon r   | IIAE7       | 19 | Antimicrobials |
| SFTP A2 | surfactant p   | COLEC5 P    | 10 | Antimicrobials |
| LPA     | lipoprotein    | (AK38 APO   | 6  | Antimicrobials |
| LBP     | lipopolysac    | BPIFD2      | 20 | Antimicrobials |
| RBP4    | retinol bind   | MCOPCB1     | 10 | Antimicrobials |
| SFTP A1 | surfactant p   | COLEC4 P    | 10 | Antimicrobials |
| NOX4    | NADPH ox       | KOX KOX     | 11 | Antimicrobials |
| LTF     | lactotransfe   | GIG12 HEI   | 3  | Antimicrobials |
| IFNB1   | interferon b   | IFB IFF IFI | 9  | Antimicrobials |
| RBP5    | retinol bind   | CRBP-III C  | 12 | Antimicrobials |
| FABP7   | fatty acid b   | B-FABP B1   | 6  | Antimicrobials |
| FABP5   | fatty acid b   | E-FABP EF   | 8  | Antimicrobials |
| FABP3   | fatty acid b   | FABP11 H-   | 1  | Antimicrobials |
| FABP2   | fatty acid b   | FABP I-F/   | 4  | Antimicrobials |
| FABP4   | fatty acid b   | A-FABP A    | 8  | Antimicrobials |
| R3HDML  | R3H domaid     | J881L22.3   | 20 | Antimicrobials |
| BPIFA3  | BPI fold co    | C20orf71 S  | 20 | Antimicrobials |
| BPIFB1  | BPI fold co    | C20orf114   | 20 | Antimicrobials |
| OASL    | 2'-5'-oligoa   | OASL1 OA    | 12 | Antimicrobials |
| CRABP2  | cellular reti  | CRABP-II    | 1  | Antimicrobials |
| CRABP1  | cellular reti  | CRABP CR    | 15 | Antimicrobials |
| RBP7    | retinol bind   | CRABP4 C    | 1  | Antimicrobials |
| DUOX1   | dual oxidas    | LNOX1 NC    | 15 | Antimicrobials |
| OBP2B   | odorant bin    | LCN14 OB    | 9  | Antimicrobials |
| RBP2    | retinol bind   | CRABP-II    | 3  | Antimicrobials |
| LCN15   | lipocalin 15   | PRO6093 L   | 9  | Antimicrobials |
| CETP    | cholesteryl    | BPIFF HDI   | 16 | Antimicrobials |
| FABP12  | fatty acid b - |             | 8  | Antimicrobials |
| FABP9   | fatty acid b   | PERF PER    | 8  | Antimicrobials |
| BPIFA1  | BPI fold co    | LUNX NA:    | 20 | Antimicrobials |
| LCNL1   | lipocalin lik  |             | 9  | Antimicrobials |
| C8G     | complemen      | C8C         | 9  | Antimicrobials |
| SPAG11A | sperm asso     | EDDM2A I    | 8  | Antimicrobials |

|         |                           |                   |
|---------|---------------------------|-------------------|
| PI15    | peptidase irCRISP8 P2-    | 8 Antimicrobials  |
| NOX1    | NADPH oxGP91-2 MC X       | Antimicrobials    |
| PMP2    | peripheral rCMT1G FA      | 8 Antimicrobials  |
| APOD    | apolipoprot -             | 3 Antimicrobials  |
| ORM2    | orosomucoiAGP-B AG        | 9 Antimicrobials  |
| ORM1    | orosomucoiAGP-A AG        | 9 Antimicrobials  |
| TNF     | tumor necrDIF TNF-a       | 6 Antimicrobials  |
| CTSG    | cathepsin G CATG CG       | 14 Antimicrobials |
| PRTN3   | proteinase 3ACPA AGI      | 19 Antimicrobials |
| MAPK1   | mitogen-acERK ERK-        | 22 Antimicrobials |
| PML     | PML nucle:MYL PP86        | 15 Antimicrobials |
| AEN     | apoptosis eISG20L1 pj     | 15 Antimicrobials |
| CYBB    | cytochromeAMCBX2 CX       | Antimicrobials    |
| BPIFA2  | BPI fold coC20orf70 P     | 20 Antimicrobials |
| ISG20   | interferon sCD25 HEM      | 15 Antimicrobials |
| BCL3    | BCL3 transBCL4 D196       | 19 Antimicrobials |
| ISG20L2 | interferon s HSD38        | 1 Antimicrobials  |
| NOX5    | NADPH ox-                 | 15 Antimicrobials |
| NOX3    | NADPH oxGP91-3 MC         | 6 Antimicrobials  |
| DUOX2   | dual oxidasLNOX2 NC       | 15 Antimicrobials |
| TLR3    | toll like rec CD283 IIA   | 4 Antimicrobials  |
| TFRC    | transferrin rCD71 IMD-    | 3 Antimicrobials  |
| IFIH1   | interferon iiAGS7 Hlcd    | 2 Antimicrobials  |
| LRP1    | LDL receptA2MR APC        | 12 Antimicrobials |
| TRIM5   | tripartite mRNF88 TR      | 11 Antimicrobials |
| IDO1    | indoleaminIDO IDO-1       | 8 Antimicrobials  |
| GDF15   | growth diffGDF-15 M       | 19 Antimicrobials |
| NEDD4   | NEDD4 E3NEDD4-1 I         | 15 Antimicrobials |
| ADIPOQ  | adiponectinACDC ACI       | 3 Antimicrobials  |
| STAT3   | signal transADMIO AI      | 17 Antimicrobials |
| STAT1   | signal transCANDF7 I      | 2 Antimicrobials  |
| IFNL2   | interferon l:IL-28A IL2   | 19 Antimicrobials |
| SOCS3   | suppressor .ATOD4 CI:     | 17 Antimicrobials |
| SEMG1   | semenogeli CT103 SEN      | 20 Antimicrobials |
| TNFSF10 | TNF superfAPO2L Ap        | 3 Antimicrobials  |
| CCL20   | C-C motif cCKb4 Exod      | 2 Antimicrobials  |
| SOCS1   | suppressor .CIS1 CISH     | 16 Antimicrobials |
| RNASEL  | ribonucleasPRCA1 RN       | 1 Antimicrobials  |
| IRF1    | interferon rIRF-1 MAF     | 5 Antimicrobials  |
| IL15    | interleukin IL-15         | 4 Antimicrobials  |
| APOBEC3 | apolipoprotA3F ARP8       | 22 Antimicrobials |
| PLAAT4  | phospholip:HRASLS4        | 11 Antimicrobials |
| CHIT1   | chitinase 1 CHI3 CHIT     | 1 Antimicrobials  |
| IFNA1   | interferon aIFL IFN IF1   | 9 Antimicrobials  |
| CD40    | CD40 moleBp50 CDW         | 20 Antimicrobials |
| TLR7    | toll like rec TLR7-like X | Antimicrobials    |
| PPIA    | peptidylproCYPA CYF       | 7 Antimicrobials  |
| HFE     | homeostaticHFE1 HH F      | 6 Antimicrobials  |
| ZYX     | zyxin ESP-2 HEC           | 7 Antimicrobials  |
| NLRX1   | NLR familyCLR11.3 D       | 11 Antimicrobials |
| PGC     | progastricsiPEPC PGII     | 6 Antimicrobials  |
| VEGFA   | vascular enMVCD1 V        | 6 Antimicrobials  |
| IKBKE   | inhibitor ofIKK-E IKK     | 1 Antimicrobials  |
| ISG15   | ISG15 ubiqG1P2 IF15       | 1 Antimicrobials  |
| DHX58   | DExH-box D11LGP2 I        | 17 Antimicrobials |
| TNFAIP3 | TNF alpha A20 AISBL       | 6 Antimicrobials  |
| TFR2    | transferrin rHFE3 TFR6    | 7 Antimicrobials  |
| FCN2    | ficolin 2 EBP-37 FC       | 9 Antimicrobials  |
| MUC4    | mucin 4, ceASGP HSA       | 3 Antimicrobials  |
| F2R     | coagulationCF2R HTR       | 5 Antimicrobials  |



|          |               |              |                   |
|----------|---------------|--------------|-------------------|
| ELN      | elastin       | ADCL1 SV     | 7 Antimicrobials  |
| IL27     | interleukin   | IL-27 IL-27  | 16 Antimicrobials |
| MAPT     | microtubule   | DDPAC FTI    | 17 Antimicrobials |
| LYZ      | lysozyme      | LYZF1 LZ     | 12 Antimicrobials |
| CCL5     | C-C motif     | cD17S136E    | 17 Antimicrobials |
| LEP      | leptin        | LEPD OB C    | 7 Antimicrobials  |
| CYLD     | CYLD lysin    | BRSS CDM     | 16 Antimicrobials |
| KLKB1    | kallikrein    | BKLB3 PKK    | 4 Antimicrobials  |
| CST4     | cystatin S    | -            | 20 Antimicrobials |
| CSRP1    | cysteine an   | CRP CRP1     | 1 Antimicrobials  |
| MAPK14   | mitogen-ac    | CSBP CSB     | 6 Antimicrobials  |
| JUN      | Jun proto-o   | AP-1 AP1 c   | 1 Antimicrobials  |
| ITGAV    | integrin su   | CD51 MSK     | 2 Antimicrobials  |
| IRF5     | interferon r  | SLEB10       | 7 Antimicrobials  |
| CCR6     | C-C motif     | cBN-1 C-C C  | 6 Antimicrobials  |
| IL12B    | interleukin   | CLMF CLM     | 5 Antimicrobials  |
| TLR8     | toll like rec | CD288 X      | Antimicrobials    |
| GNLY     | granulysin    | D2S69E LA    | 2 Antimicrobials  |
| CD81     | CD81 mole     | CVID6 S5.    | 11 Antimicrobials |
| EIF2AK2  | eukaryotic    | EIF2AK1 L    | 2 Antimicrobials  |
| APOM     | apolipoprot   | G3a HSPC     | 6 Antimicrobials  |
| CACYBP   | calcyclin     | biGIG5 PNA   | 1 Antimicrobials  |
| NOD1     | nucleotide    | ICARD4 CL    | 7 Antimicrobials  |
| MAPK8    | mitogen-ac    | JNK JNK-4    | 10 Antimicrobials |
| MAPK3    | mitogen-ac    | ERK-1 ERK    | 16 Antimicrobials |
| BST2     | bone marro    | CD317 TE     | 19 Antimicrobials |
| BPHL     | biphenyl hy   | BPH-RP M     | 6 Antimicrobials  |
| PLA2G2A  | phospholip    | MOM1 PL      | 1 Antimicrobials  |
| GRN      | granulin pr   | CLN11 GE     | 17 Antimicrobials |
| NEWENTF- | -             | -            | Antimicrobials    |
| PDGFRA   | platelet deri | CD140A PI    | 4 Antimicrobials  |
| GNAI1    | G protein s   | Gi           | 7 Antimicrobials  |
| WNT5A    | Wnt family    | hWNT5A       | 3 Antimicrobials  |
| FURIN    | furin, paire  | FUR PACE     | 15 Antimicrobials |
| ADAR     | adenosine c   | ADAR1 AC     | 1 Antimicrobials  |
| TYK2     | tyrosine kir  | IMD35 JTK    | 19 Antimicrobials |
| NOS2     | nitric oxide  | HEP-NOS      | 17 Antimicrobials |
| TRAF3    | TNF recept    | CAP-1 CAI    | 14 Antimicrobials |
| TPT1     | tumor prote   | HRF TCTP     | 13 Antimicrobials |
| TPM2     | tropomyosi    | AMCD1 D      | 9 Antimicrobials  |
| NEO1     | neogenin 1    | IGDCC2 N     | 15 Antimicrobials |
| AHNAK    | AHNAK nt      | AHNAKR5      | 11 Antimicrobials |
| TLR1     | toll like rec | CD281 TIL    | 4 Antimicrobials  |
| TK2      | thymidine     | MTDPS2 N     | 16 Antimicrobials |
| PRDX2    | peroxiredo    | HEL-S-2a T   | 19 Antimicrobials |
| MX2      | MX dynam      | MXB          | 21 Antimicrobials |
| FGF2     | fibroblast g  | BFGF FGF     | 4 Antimicrobials  |
| FGA      | fibrinogen    | Fib2         | 4 Antimicrobials  |
| TCF7L2   | transcriptio  | TCF-4 TCF    | 10 Antimicrobials |
| F2RL1    | F2R like      | tryGPR11 PAI | 5 Antimicrobials  |
| TKFC     | triokinase    | aDAK NET     | 11 Antimicrobials |
| MSR1     | macrophag     | CD204 SC     | 8 Antimicrobials  |
| NFKBIZ   | NFKB inhi     | IKBZ INAI    | 3 Antimicrobials  |
| LMBR1    | limb develc   | ACHP C7o     | 7 Antimicrobials  |
| EPPIN    | epididymal    | CT71 CT72    | 20 Antimicrobials |
| SRC      | SRC proto-    | ASV SRC1     | 20 Antimicrobials |
| MPO      | myeloperox    | -            | 17 Antimicrobials |
| ELAVL1   | ELAV like     | ELAV1 HU     | 19 Antimicrobials |
| ROBO3    | roundabout    | HGPPS HG     | 11 Antimicrobials |
| SP1      | Sp1 transcr   | -            | 12 Antimicrobials |

|          |                         |                   |
|----------|-------------------------|-------------------|
| SOD1     | superoxide ALS ALS1     | 21 Antimicrobials |
| PDF      | peptide defi-           | 16 Antimicrobials |
| DLL4     | delta like c:AOS6 delta | 15 Antimicrobials |
| ECD      | ecdysonele:GCR2 HSG     | 10 Antimicrobials |
| SLC11A1  | solute carri:LSH NRAM   | 2 Antimicrobials  |
| DMBT1    | deleted in nGP340 SAC   | 10 Antimicrobials |
| STING1   | stimulator cERIS MIT/   | 5 Antimicrobials  |
| SKIV2L   | Ski2 like R:170A DDX    | 6 Antimicrobials  |
| SEMG2    | semenogeli SGII         | 20 Antimicrobials |
| LTA      | lymphotoxiLT TNFB I     | 6 Antimicrobials  |
| DES      | desmin CDCD3 CS         | 2 Antimicrobials  |
| DCK      | deoxycyidi-             | 4 Antimicrobials  |
| DAXX     | death domaBING2 DA      | 6 Antimicrobials  |
| TNFRSF10 | TNF receptAPO2 CD2      | 8 Antimicrobials  |
| TNFRSF10 | TNF receptCD262 DR:     | 8 Antimicrobials  |
| EED      | embryonic cCOGIS HE     | 11 Antimicrobials |
| CCL4     | C-C motif cACT2 AT7:    | 17 Antimicrobials |
| LIMS1    | LIM zinc fiPINCH PIN    | 2 Antimicrobials  |
| LALBA    | lactalbuminLYZG         | 12 Antimicrobials |
| APOBEC3  | apolipoprotA3H ARP-     | 22 Antimicrobials |
| TMPRSS6  | transmembIRIDA MT:      | 22 Antimicrobials |
| SPINK5   | serine peptiLEKTI LE    | 5 Antimicrobials  |
| MARCO    | macrophagSCARA2 S       | 2 Antimicrobials  |
| BECN1    | beclin 1 ATG6 VPS       | 17 Antimicrobials |
| TNFSF11  | TNF superfCD254 OD      | 13 Antimicrobials |
| KNG1     | kininogen 1BDK BK H     | 3 Antimicrobials  |
| CSK      | C-terminal -            | 15 Antimicrobials |
| KLRK1    | killer cell lcCD314 D12 | 12 Antimicrobials |
| KCNH2    | potassium vERG-1 ERC    | 7 Antimicrobials  |
| JUND     | JunD proto- AP-1        | 19 Antimicrobials |
| JAK1     | Janus kinasJAK1A JAI    | 1 Antimicrobials  |
| CREB1    | cAMP respCREB CRE       | 2 Antimicrobials  |
| CLDN4    | claudin 4 CPE-R CPE     | 7 Antimicrobials  |
| CCL28    | C-C motif cCCK1 MEC     | 5 Antimicrobials  |
| RNASE3   | ribonucleasECP RAF1     | 14 Antimicrobials |
| RN7SL1   | RNA comp 7L1a 7SL R     | 14 Antimicrobials |
| IRF7     | interferon rIMD39 IRF   | 11 Antimicrobials |
| IREB2    | iron respon:ACO3 IRE-   | 15 Antimicrobials |
| ILK      | integrin lin HEL-S-28   | 11 Antimicrobials |
| IL18     | interleukin IGIF IL-18  | 11 Antimicrobials |
| IL17A    | interleukin CTLA-8 C    | 6 Antimicrobials  |
| LTB4R    | leukotriene BLT1 BLT:   | 14 Antimicrobials |
| APOBEC3  | apolipoprotA3A ARP3     | 22 Antimicrobials |
| MASP2    | mannan binMAP19 M/      | 1 Antimicrobials  |
| TRIM27   | tripartite m:RFP RNF7   | 6 Antimicrobials  |
| RELA     | RELA protCMCU NF        | 11 Antimicrobials |
| IL7R     | interleukin CD127 CD    | 5 Antimicrobials  |
| IL1A     | interleukin IL-1 alpha  | 2 Antimicrobials  |
| PTX3     | pentraxin 3TNFAIP5 I    | 3 Antimicrobials  |
| IFNAR2   | interferon aIFN-R IFN-  | 21 Antimicrobials |
| IFN1@    | - IFNA                  | 9 Antimicrobials  |
| SYTL1    | synaptotagrJFC1 SLP1    | 1 Antimicrobials  |
| APOBEC3  | apolipoprotA3C APOB     | 22 Antimicrobials |
| DDX17    | DEAD-box P72 RH70       | 22 Antimicrobials |
| PTGS2    | prostaglandCOX-2 CO:    | 1 Antimicrobials  |
| HTR1A    | 5-hydroxyt5-HT-1A 5-    | 5 Antimicrobials  |
| SEPTIN7  | septin 7 CDC10 CD       | 7 Antimicrobials  |
| CD40LG   | CD40 ligandCD154 CD-X   | Antimicrobials    |
| CD14     | CD14 mole-              | 5 Antimicrobials  |
| CD8A     | CD8a moleCD8 Leu2 f     | 2 Antimicrobials  |

|          |                         |                   |
|----------|-------------------------|-------------------|
| CD4      | CD4 molec CD4mut        | 12 Antimicrobials |
| MASP1    | mannan bin3MC1 CRA      | 3 Antimicrobials  |
| PROC     | protein C, iAPC PC PR   | 2 Antimicrobials  |
| MAP2K2   | mitogen-ac CFC4 MAF     | 19 Antimicrobials |
| MAP2K1   | mitogen-ac CFC3 MAF     | 15 Antimicrobials |
| HRG      | histidine ricHPRG HRC   | 3 Antimicrobials  |
| NDRG1    | N-myc dowCAP43 CM       | 8 Antimicrobials  |
| IRF9     | interferon r IRF-9 ISGF | 14 Antimicrobials |
| TRIM22   | tripartite m GPSTAF50   | 11 Antimicrobials |
| LANCL1   | LanC like 1GPR69A p     | 2 Antimicrobials  |
| PPP4C    | protein phoPP-X PP4 P   | 16 Antimicrobials |
| HMOX1    | heme oxyg HMOX1D        | 22 Antimicrobials |
| HMGB1    | high mobiliHMG-1 HN     | 13 Antimicrobials |
| HLA-B    | major histoAS B-4901    | 6 Antimicrobials  |
| RNASE7   | ribonucleas RAE1        | 14 Antimicrobials |
| ABCC4    | ATP bindinMOAT-B N      | 13 Antimicrobials |
| HGF      | hepatocyte DFNB39 F-    | 7 Antimicrobials  |
| HDAC1    | histone deaGON-10 H     | 1 Antimicrobials  |
| IFNLR1   | interferon l:CRF2/12 IF | 1 Antimicrobials  |
| PLSCR1   | phospholipiMMTRA1 F     | 3 Antimicrobials  |
| B2M      | beta-2-micr IMD43       | 15 Antimicrobials |
| BACH2    | BTB domaiBTBD25 IN      | 6 Antimicrobials  |
| TANK     | TRAF famiI-TRAF ITI     | 2 Antimicrobials  |
| PIK3CG   | phosphatidyPI3CG PI3I   | 7 Antimicrobials  |
| ARRB1    | arrestin bet:ARB1 ARR   | 11 Antimicrobials |
| RSAD2    | radical S-ac2510004L0   | 2 Antimicrobials  |
| STAB2    | stabilin 2 FEEL2 FEI    | 12 Antimicrobials |
| TBK1     | TANK bincFTDALS4        | 12 Antimicrobials |
| PDYN     | prodynorphADCA PEN      | 20 Antimicrobials |
| PDGFRB   | platelet deriCD140B IE  | 5 Antimicrobials  |
| PDCD1    | programmeCD279 PD-      | 2 Antimicrobials  |
| PCSK2    | proprotein cNEC 2 NEC   | 20 Antimicrobials |
| PCSK1    | proprotein cBMIQ12 N    | 5 Antimicrobials  |
| ARG2     | arginase 2 -            | 14 Antimicrobials |
| AQP9     | aquaporin 9AQP-9 HsI    | 15 Antimicrobials |
| FASLG    | Fas ligand ALPS1B A     | 1 Antimicrobials  |
| APOH     | apolipoprotB2G1 B2G     | 17 Antimicrobials |
| BIRC5    | baculoviral API4 EPR-   | 17 Antimicrobials |
| ANXA6    | annexin A6ANX6 CBF      | 5 Antimicrobials  |
| IL22     | interleukin IL-21 IL-22 | 12 Antimicrobials |
| VTN      | vitronectin V75 VN VT   | 17 Antimicrobials |
| VIM      | vimentin -              | 10 Antimicrobials |
| VCAM1    | vascular ce CD106 INC   | 1 Antimicrobials  |
| PRDX1    | peroxiredo>MSP23 NK     | 1 Antimicrobials  |
| GFAP     | glial fibrillε ALXDRD   | 17 Antimicrobials |
| GBP2     | guanylate b-            | 1 Antimicrobials  |
| ALB      | albumin HSA PRO0        | 4 Antimicrobials  |
| SLC29A3  | solute carriENT3 HCL    | 10 Antimicrobials |
| OAS1     | 2'-5'-oligoaE18/E16 IF  | 12 Antimicrobials |
| AGER     | advanced g RAGE SCA     | 6 Antimicrobials  |
| UNC93B1  | unc-93 hon IIAE1 UNC    | 11 Antimicrobials |
| TNFSF4   | TNF super CD134L CI     | 1 Antimicrobials  |
| NOS1     | nitric oxide IHPS1 N-N  | 12 Antimicrobials |
| ACTG1    | actin gammACT ACTC      | 17 Antimicrobials |
| ACTA1    | actin alpha ACTA ASM    | 1 Antimicrobials  |
| ACO1     | aconitase 1 ACONS HI    | 9 Antimicrobials  |
| SERPINA3 | serpin famiAACT AC      | 14 Antimicrobials |
| CXCR1    | C-X-C motC-C C-C-C      | 2 Antimicrobials  |
| CCL15    | C-C motif cHCC-2 HM     | 17 Antimicrobials |
| CCL14    | C-C motif cCC-1 CC-3    | 17 Antimicrobials |

|          |                         |                   |
|----------|-------------------------|-------------------|
| CCL4     | C-C motif cACT2 AT7     | 17 Antimicrobials |
| CCL16    | C-C motif cCKb12 HC     | 17 Antimicrobials |
| CCL19    | C-C motif cCKb11 ELC    | 9 Antimicrobials  |
| CCL13    | C-C motif cCKb10 MC     | 17 Antimicrobials |
| CCL18    | C-C motif cAMAC-1 A     | 17 Antimicrobials |
| CCL17    | C-C motif cA-152E5.3    | 16 Antimicrobials |
| CCL26    | C-C motif cIMAC MIP     | 7 Antimicrobials  |
| CCL22    | C-C motif cA-152E5.1    | 16 Antimicrobials |
| CCR3     | C-C motif cC C CKR3     | 3 Antimicrobials  |
| CCL28    | C-C motif cCCK1 MEC     | 5 Antimicrobials  |
| CCL4L1   | C-C motif cAT744.2 C    | 17 Antimicrobials |
| ACKR2    | atypical chcCCBP2 CC    | 3 Antimicrobials  |
| CCR7     | C-C motif cBLR2 CC-C    | 17 Antimicrobials |
| CCL27    | C-C motif cALP CTAC     | 9 Antimicrobials  |
| CCR8     | C-C motif cCC-CKR-8     | 3 Antimicrobials  |
| ACKR4    | atypical chcCC-CKR-1    | 3 Antimicrobials  |
| CCR10    | C-C motif cGPR2         | 17 Antimicrobials |
| CCL2     | C-C motif cGDCF-2 H     | 17 Antimicrobials |
| CCL21    | C-C motif c6Ckine CK    | 9 Antimicrobials  |
| CCL7     | C-C motif cFIC MARC     | 17 Antimicrobials |
| CCL5     | C-C motif cD17S136E     | 17 Antimicrobials |
| CCL3     | C-C motif cG0S19-1 L    | 17 Antimicrobials |
| CCL20    | C-C motif cCKb4 Exod    | 2 Antimicrobials  |
| CCL11    | C-C motif cSCYA11       | 17 Antimicrobials |
| CCR5     | C-C motif cCC-CKR-5     | 3 Antimicrobials  |
| CCL23    | C-C motif cCK-BETA-     | 17 Antimicrobials |
| CCL25    | C-C motif cCkb15 SCY    | 19 Antimicrobials |
| CCL1     | C-C motif cI-309 P500   | 17 Antimicrobials |
| CCL3L3   | C-C motif c464.2 D17S   | 17 Antimicrobials |
| CCL4L2   | C-C motif cAT744.2 C    | 17 Antimicrobials |
| CXCL12   | C-X-C mot IRH PBSF      | 10 Antimicrobials |
| XCL1     | X-C motif cATAC LPT     | 1 Antimicrobials  |
| CCL8     | C-C motif cHC14 MCP     | 17 Antimicrobials |
| CCL3L1   | C-C motif c464.2 D17S   | 17 Antimicrobials |
| CCR1     | C-C motif cCD191 CK     | 3 Antimicrobials  |
| CCL24    | C-C motif cCkb-6 MPI    | 7 Antimicrobials  |
| XCL2     | X-C motif cSCM-1b SC    | 1 Antimicrobials  |
| CXCL1    | C-X-C mot FSP GRO1      | 4 Antimicrobials  |
| CXCL10   | C-X-C mot C7 IFI10 IN   | 4 Antimicrobials  |
| CXCR4    | C-X-C mot CD184 D28     | 2 Antimicrobials  |
| CXCL2    | C-X-C mot CINC-2a G     | 4 Antimicrobials  |
| CXCR6    | C-X-C mot BONZO CI      | 3 Antimicrobials  |
| CCR4     | C-C motif cCC-CKR-4     | 3 Antimicrobials  |
| CXCL11   | C-X-C mot H174 I-TA     | 4 Antimicrobials  |
| TAFA5    | TAFA cherFAM19A5        | 22 Antimicrobials |
| TAFA3    | TAFA cherFAM19A3        | 1 Antimicrobials  |
| TAFA4    | TAFA cherFAM19A4        | 3 Antimicrobials  |
| TAFA1    | TAFA cherFAM19A1        | 3 Antimicrobials  |
| TAFA2    | TAFA cherFAM19A2        | 12 Antimicrobials |
| CCL15-CC | CCL15-CCCCL15 HC        | 17 Antimicrobials |
| IL6      | interleukin BSF-2 BSF   | 7 Antimicrobials  |
| TNF      | tumor necrDIF TNF-a     | 6 Antimicrobials  |
| IL1B     | interleukin IL-1 IL-1-B | 2 Antimicrobials  |
| IL18     | interleukin IGIF IL-18  | 11 Antimicrobials |
| PTK2B    | protein tyroCADTK C/    | 8 Antimicrobials  |
| VEGFA    | vascular enMVCD1 V      | 6 Antimicrobials  |
| IL4      | interleukin BCGF-1 BC   | 5 Antimicrobials  |
| CDH1     | cadherin 1 Arc-1 BCD    | 16 Antimicrobials |
| CD40     | CD40 moleBp50 CDW       | 20 Antimicrobials |
| DEFB103B | defensin beBD-3 DEFI    | 8 Antimicrobials  |



|         |                          |                        |
|---------|--------------------------|------------------------|
| F2RL1   | F2R like tryGPR11 PAI    | 5 Antimicrobials       |
| MMP9    | matrix met:CLG4B GE      | 20 Antimicrobials      |
| LTBP1   | latent trans-            | 2 Antimicrobials       |
| DEFB4A  | defensin beBD-2 DEFI     | 8 Antimicrobials       |
| TNFSF10 | TNF superfAPO2L Ap       | 3 Antimicrobials       |
| IL13    | interleukin IL-13 P600   | 5 Antimicrobials       |
| IL10    | interleukin CSIF GVH     | 1 Antimicrobials       |
| IL2     | interleukin IL-2 TCGF    | 4 Antimicrobials       |
| PPARG   | peroxisomeCIMT1 GL       | 3 Antimicrobials       |
| FGR     | FGR proto-SRC2 c-fgr     | 1 Antimicrobials       |
| MIF     | macrophag:GIF GLIF N     | 22 Antimicrobials      |
| CRP     | C-reactive  PTX1         | 1 Antimicrobials       |
| JAK2    | Janus kinasJTK10 THC     | 9 Antimicrobials       |
| IL1A    | interleukin IL-1 alpha   | 2 Antimicrobials       |
| PTK2    | protein tyroFADK FAk     | 8 Antimicrobials       |
| PTGDR   | prostaglandAS1 ASRT      | 14 Antimicrobials      |
| CD86    | CD86 moleB7-2 B7.2 H     | 3 Antimicrobials       |
| HCK     | HCK proto-JTK9 p59H      | 20 Antimicrobials      |
| ARRB1   | arrestin bet:ARB1 ARR    | 11 Antimicrobials      |
| GNAI1   | G protein s Gi           | 7 Antimicrobials       |
| VDR     | vitamin D rNR11 PPP      | 12 Antimicrobials      |
| OLR1    | oxidized lo:CLEC8A L     | 12 Antimicrobials      |
| GRK2    | G protein-c ADRBK1 E     | 11 Antimicrobials      |
| TXK     | TXK tyrosiBTKL PSC       | 4 Antimicrobials       |
| RNASE2  | ribonucleasEDN RAF3      | 14 Antimicrobials      |
| CD79A   | CD79a molIGA MB-1        | 19 BCRSignalingPathway |
| CD79B   | CD79b molAGM6 B29        | 17 BCRSignalingPathway |
| LYN     | LYN proto-JTK8 p53L      | 8 BCRSignalingPathway  |
| SYK     | spleen asso p72-Syk      | 9 BCRSignalingPathway  |
| BTK     | Bruton tyroAGMX1 A' X    | BCRSignalingPathway    |
| BLNK    | B cell linkeAGM4 BA'     | 10 BCRSignalingPathway |
| VAV3    | vav guanin-              | 1 BCRSignalingPathway  |
| VAV1    | vav guanin VAV           | 19 BCRSignalingPathway |
| VAV2    | vav guanin VAV-2         | 9 BCRSignalingPathway  |
| RAC1    | Rac family MIG5 MRI      | 7 BCRSignalingPathway  |
| RAC2    | Rac family EN-7 Gx H     | 22 BCRSignalingPathway |
| RAC3    | Rac family -             | 17 BCRSignalingPathway |
| PPP3CA  | protein pho ACCIID C/    | 4 BCRSignalingPathway  |
| PPP3CB  | protein pho CALNA2 C     | 10 BCRSignalingPathway |
| PPP3CC  | protein pho CALNA3 C     | 8 BCRSignalingPathway  |
| CHP1    | calcineurin CHP SLC9     | 15 BCRSignalingPathway |
| PPP3R1  | protein pho CALNB1 C     | 2 BCRSignalingPathway  |
| PPP3R2  | protein pho PPP3RL       | 9 BCRSignalingPathway  |
| CHP2    | calcineurin -            | 16 BCRSignalingPathway |
| NFAT5   | nuclear factNF-AT5 NI    | 16 BCRSignalingPathway |
| NFATC1  | nuclear factNF-ATC N     | 18 BCRSignalingPathway |
| NFATC2  | nuclear factNFAT1 NF     | 20 BCRSignalingPathway |
| NFATC3  | nuclear factNF-AT4c N    | 16 BCRSignalingPathway |
| NFATC4  | nuclear factNF-AT3 NI    | 14 BCRSignalingPathway |
| HRAS    | HRas proto C-BAS/HA      | 11 BCRSignalingPathway |
| KRAS    | KRAS prot'C-K-RAS C      | 12 BCRSignalingPathway |
| NRAS    | NRAS protALPS4 CM        | 1 BCRSignalingPathway  |
| FOS     | Fos proto-oAP-1 C-FO     | 14 BCRSignalingPathway |
| JUN     | Jun proto-oAP-1 AP1 c    | 1 BCRSignalingPathway  |
| CARD11  | caspase rec.BENTA BI     | 7 BCRSignalingPathway  |
| BCL10   | BCL10 imrCARMEN          | 1 BCRSignalingPathway  |
| MALT1   | MALT1 paIMD12 ML         | 18 BCRSignalingPathway |
| CHUK    | component IKBKA IKI      | 10 BCRSignalingPathway |
| IKBKB   | inhibitor of IKK-beta II | 8 BCRSignalingPathway  |
| IKBKG   | inhibitor of AMCBX1 IX   | BCRSignalingPathway    |

|          |                        |                        |
|----------|------------------------|------------------------|
| NFKB1    | nuclear factCVID12 EF  | 4 BCRSignalingPathway  |
| RELA     | RELA protCMCU NF       | 11 BCRSignalingPathway |
| NFKBIA   | NFKB inhilEDAID2 IK    | 14 BCRSignalingPathway |
| NFKBIB   | NFKB inhilKBB TRIF     | 19 BCRSignalingPathway |
| NFKBIE   | NFKB inhilKBE          | 6 BCRSignalingPathway  |
| CD81     | CD81 moleCVID6 S5.     | 11 BCRSignalingPathway |
| CD19     | CD19 moleB4 CVID3      | 16 BCRSignalingPathway |
| CR2      | complemenC3DR CD2      | 1 BCRSignalingPathway  |
| PIK3R5   | phosphoinoF7300381:    | 17 BCRSignalingPathway |
| PIK3R1   | phosphoinoAGM7 GR      | 5 BCRSignalingPathway  |
| PIK3R2   | phosphoinoMPPH MPI     | 19 BCRSignalingPathway |
| PIK3R3   | phosphoinop55 p55-G/   | 1 BCRSignalingPathway  |
| PIK3CA   | phosphatidyCLAPO CL    | 3 BCRSignalingPathway  |
| PIK3CB   | phosphatidyP110BETA    | 3 BCRSignalingPathway  |
| PIK3CD   | phosphatidyAPDS IMD    | 1 BCRSignalingPathway  |
| PIK3CG   | phosphatidyPI3CG PI3I  | 7 BCRSignalingPathway  |
| AKT3     | AKT serineMPPH MPI     | 1 BCRSignalingPathway  |
| AKT1     | AKT serineAKT CWS      | 14 BCRSignalingPathway |
| AKT2     | AKT serineHIHGHH P     | 19 BCRSignalingPathway |
| GSK3B    | glycogen sy-           | 3 BCRSignalingPathway  |
| INPP5D   | inositol polSHIP SHIP  | 2 BCRSignalingPathway  |
| CD22     | CD22 moleSIGLEC-2      | 19 BCRSignalingPathway |
| CD72     | CD72 moleCD72b LY      | 9 BCRSignalingPathway  |
| PTPN6    | protein tyroHCP HCP    | 12 BCRSignalingPathway |
| LILRB3   | leukocyte iCD85A HL    | 19 BCRSignalingPathway |
| FCGR2B   | Fc fragmenCD32 CD3:    | 1 BCRSignalingPathway  |
| RASGRP3  | RAS guany GRP3         | 2 BCRSignalingPathway  |
| PLCG2    | phospholip:APLAID F    | 16 BCRSignalingPathway |
| PRKCB    | protein kinPKC-beta P  | 16 BCRSignalingPathway |
| IFITM1   | interferon i9-27 CD22: | 11 BCRSignalingPathway |
| IGH      | immunogloIGD1 IGH.     | 14 BCRSignalingPathway |
| IGHA1    | immunoglo IgA1         | 14 BCRSignalingPathway |
| IGHA2    | immunoglo -            | 14 BCRSignalingPathway |
| IGHD     | immunoglo -            | 14 BCRSignalingPathway |
| IGHD1-1  | immunoglo IGH11        | 14 BCRSignalingPathway |
| IGHD1-14 | immunogloDM2 IGH       | 14 BCRSignalingPathway |
| IGHD1-20 | immunoglo IGH120       | 14 BCRSignalingPathway |
| IGHD1-26 | immunoglo IGH126       | 14 BCRSignalingPathway |
| IGHD1-7  | immunogloDM1 IGH       | 14 BCRSignalingPathway |
| IGHD2-15 | immunogloD2 IGHD2      | 14 BCRSignalingPathway |
| IGHD2-2  | immunoglo IGH22        | 14 BCRSignalingPathway |
| IGHD2-21 | immunoglo IGH221       | 14 BCRSignalingPathway |
| IGHD2-8  | immunogloDLR1 IGH      | 14 BCRSignalingPathway |
| IGHD3-10 | immunogloDXP1 IGH      | 14 BCRSignalingPathway |
| IGHD3-16 | immunoglo IGH316       | 14 BCRSignalingPathway |
| IGHD3-22 | immunoglo IGH322       | 14 BCRSignalingPathway |
| IGHD3-3  | immunogloDXP4 IGH      | 14 BCRSignalingPathway |
| IGHD3-9  | immunogloDXP1 IGH      | 14 BCRSignalingPathway |
| IGHD4-11 | immunogloDA1 IGHD      | 14 BCRSignalingPathway |
| IGHD4-17 | immunoglo IGH417       | 14 BCRSignalingPathway |
| IGHD4-23 | immunoglo IGH423       | 14 BCRSignalingPathway |
| IGHD4-4  | immunogloDA4 IGHD      | 14 BCRSignalingPathway |
| IGHD5-12 | immunogloDK1 IGHD      | 14 BCRSignalingPathway |
| IGHD5-18 | immunoglo IGH518       | 14 BCRSignalingPathway |
| IGHD5-24 | immunoglo IGH524       | 14 BCRSignalingPathway |
| IGHD5-5  | immunogloDK4 IGHD      | 14 BCRSignalingPathway |
| IGHD6-13 | immunogloDN1 IGHD      | 14 BCRSignalingPathway |
| IGHD6-19 | immunoglo IGH619       | 14 BCRSignalingPathway |
| IGHD6-25 | immunoglo IGH625       | 14 BCRSignalingPathway |
| IGHD6-6  | immunogloD(N4) IGH     | 14 BCRSignalingPathway |

|          |                      |    |                     |
|----------|----------------------|----|---------------------|
| IGHD7-27 | immunogloDhq52 IGI   | 14 | BCRSignalingPathway |
| IGHE     | immunoglo IgE        | 14 | BCRSignalingPathway |
| IGHG1    | immunoglo -          | 14 | BCRSignalingPathway |
| IGHG2    | immunoglo -          | 14 | BCRSignalingPathway |
| IGHG3    | immunoglo IgG3       | 14 | BCRSignalingPathway |
| IGHG4    | immunoglo -          | 14 | BCRSignalingPathway |
| IGHJ1    | immunoglo JH1        | 14 | BCRSignalingPathway |
| IGHJ2    | immunoglo JH2        | 14 | BCRSignalingPathway |
| IGHJ3    | immunoglo JH3b       | 14 | BCRSignalingPathway |
| IGHJ4    | immunoglo JH4b       | 14 | BCRSignalingPathway |
| IGHJ5    | immunoglo JH5b       | 14 | BCRSignalingPathway |
| IGHJ6    | immunoglo JH6b       | 14 | BCRSignalingPathway |
| IGHM     | immunoglo AGM1 MU    | 14 | BCRSignalingPathway |
| IGH      | immunoglo IGD1 IGH.  | 14 | BCRSignalingPathway |
| IGHV1-18 | immunoglo IGHV118    | 14 | BCRSignalingPathway |
| IGHV1-2  | immunoglo IGHV12 V.  | 14 | BCRSignalingPathway |
| IGHV1-24 | immunoglo IGHV124 V. | 14 | BCRSignalingPathway |
| IGHV1-3  | immunoglo IGHV13 V   | 14 | BCRSignalingPathway |
| IGHV1-45 | immunoglo IGHV145 V. | 14 | BCRSignalingPathway |
| IGHV1-46 | immunoglo IGHV146    | 14 | BCRSignalingPathway |
| IGHV1-58 | immunoglo IGHV158 V. | 14 | BCRSignalingPathway |
| IGHV1-69 | immunoglo IGHV1-E I. | 14 | BCRSignalingPathway |
| IGHV1-8  | immunoglo IGHV18     | 14 | BCRSignalingPathway |
| IGHV1-38 | immunoglo IGHV1-C I. | 14 | BCRSignalingPathway |
| IGHV1-69 | immunoglo IGHV1-F I. | 14 | BCRSignalingPathway |
| IGHV2-26 | immunoglo IGHV226 V. | 14 | BCRSignalingPathway |
| IGHV2-5  | immunoglo IGHV25 V   | 14 | BCRSignalingPathway |
| IGHV2-70 | immunoglo IGHV270 V. | 14 | BCRSignalingPathway |
| IGHV3-11 | immunoglo IGHV311 V. | 14 | BCRSignalingPathway |
| IGHV3-13 | immunoglo IGHV313    | 14 | BCRSignalingPathway |
| IGHV3-15 | immunoglo IGHV315 V. | 14 | BCRSignalingPathway |
| IGHV3-16 | immunoglo IGHV316 V. | 14 | BCRSignalingPathway |
| IGHV3-20 | immunoglo IGHV320 V. | 14 | BCRSignalingPathway |
| IGHV3-21 | immunoglo IGHV321 V. | 14 | BCRSignalingPathway |
| IGHV3-23 | immunoglo DP47 IGHV  | 14 | BCRSignalingPathway |
| IGHV3-30 | immunoglo IGHV330 V. | 14 | BCRSignalingPathway |
| IGHV3-30 | immunoglo IGHV3-3 I. | 14 | BCRSignalingPathway |
| IGHV3-30 | immunoglo IGHV3-3 I. | 14 | BCRSignalingPathway |
| IGHV3-33 | immunoglo IGHV333 V. | 14 | BCRSignalingPathway |
| IGHV3-35 | immunoglo IGHV335 V. | 14 | BCRSignalingPathway |
| IGHV3-38 | immunoglo IGHV338 V. | 14 | BCRSignalingPathway |
| IGHV3-43 | immunoglo IGHV343 V. | 14 | BCRSignalingPathway |
| IGHV3-48 | immunoglo IGHV348 V. | 14 | BCRSignalingPathway |
| IGHV3-49 | immunoglo IGHV349 V. | 14 | BCRSignalingPathway |
| IGHV3-53 | immunoglo IGHV353 V. | 14 | BCRSignalingPathway |
| IGHV3-64 | immunoglo IGHV364 V. | 14 | BCRSignalingPathway |
| IGHV3-66 | immunoglo IGHV366 V. | 14 | BCRSignalingPathway |
| IGHV3-7  | immunoglo IGHV37 V   | 14 | BCRSignalingPathway |
| IGHV3-72 | immunoglo IGHV372 V. | 14 | BCRSignalingPathway |
| IGHV3-73 | immunoglo IGHV373 V. | 14 | BCRSignalingPathway |
| IGHV3-74 | immunoglo IGHV374 V. | 14 | BCRSignalingPathway |
| IGHV3-9  | immunoglo IGHV39 V   | 14 | BCRSignalingPathway |
| IGHV3-38 | immunoglo IGHV3-D I. | 14 | BCRSignalingPathway |
| IGHV3-69 | immunoglo IGHV3 IGHM | 14 | BCRSignalingPathway |
| IGHV4-28 | immunoglo IGHV428 V. | 14 | BCRSignalingPathway |
| IGHV4-30 | immunoglo IGHV4-3    | 14 | BCRSignalingPathway |
| IGHV4-30 | immunoglo IGHV4-3 I. | 14 | BCRSignalingPathway |
| IGHV4-30 | immunoglo IGHV4-3 I. | 14 | BCRSignalingPathway |
| IGHV4-31 | immunoglo IGHV431    | 14 | BCRSignalingPathway |
| IGHV4-34 | immunoglo IGHV434 V. | 14 | BCRSignalingPathway |

|                              |                        |
|------------------------------|------------------------|
| IGHV4-39 immunogloIGHV439\   | 14 BCRSignalingPathway |
| IGHV4-4 immunogloIGHV44 V    | 14 BCRSignalingPathway |
| IGHV4-59 immunogloIGHV459\   | 14 BCRSignalingPathway |
| IGHV4-61 immunogloIGHV461\   | 14 BCRSignalingPathway |
| IGHV4-38-immunogloIGHV4-B I  | 14 BCRSignalingPathway |
| IGHV5-51 immunogloIGHV551\   | 14 BCRSignalingPathway |
| IGHV5-10-immunogloIGHV5-A I  | 14 BCRSignalingPathway |
| IGHV6-1 immunogloIGHV61 V    | 14 BCRSignalingPathway |
| IGHV7-4-1 immunogloIGHV7-41  | 14 BCRSignalingPathway |
| IGHV7-81 immunoglo IGHV781   | 14 BCRSignalingPathway |
| IGK immunoglo IGK@           | 2 BCRSignalingPathway  |
| IGKC immunogloHCAK1 IG       | 2 BCRSignalingPathway  |
| IGKDEL immunoglo IGKDE       | 2 BCRSignalingPathway  |
| IGKJ - IGKJ@                 | 2 BCRSignalingPathway  |
| IGKJ1 immunoglo J1           | 2 BCRSignalingPathway  |
| IGKJ2 immunoglo J2           | 2 BCRSignalingPathway  |
| IGKJ3 immunoglo J3           | 2 BCRSignalingPathway  |
| IGKJ4 immunoglo J4           | 2 BCRSignalingPathway  |
| IGKJ5 immunoglo J5           | 2 BCRSignalingPathway  |
| IGKV@ - IGKV IGK             | 2 BCRSignalingPathway  |
| IGKV1-12 immunogloIGKV112 L  | 2 BCRSignalingPathway  |
| IGKV1-13 immunogloIGKV113 L  | 2 BCRSignalingPathway  |
| IGKV1-16 immunogloIGKV116 L  | 2 BCRSignalingPathway  |
| IGKV1-17 immunogloA30 IGKV   | 2 BCRSignalingPathway  |
| IGKV1-27 immunogloA20 IGKV   | 2 BCRSignalingPathway  |
| IGKV1-33 immunogloIGKV133 C  | 2 BCRSignalingPathway  |
| IGKV1-37 immunogloIGKV137 C  | 2 BCRSignalingPathway  |
| IGKV1-39 immunogloIGKV139 C  | 2 BCRSignalingPathway  |
| IGKV1-5 immunogloIGKV IGK    | 2 BCRSignalingPathway  |
| IGKV1-6 immunogloIGKV16 L1   | 2 BCRSignalingPathway  |
| IGKV1-8 immunogloIGKV18 L8   | 2 BCRSignalingPathway  |
| IGKV1-9 immunogloIGKV19 L8   | 2 BCRSignalingPathway  |
| IGKV1D-1 immunogloIGKV1D12   | 2 BCRSignalingPathway  |
| IGKV1D-1 immunogloIGKV1D13   | 2 BCRSignalingPathway  |
| IGKV1D-1 immunogloIGKV1D16   | 2 BCRSignalingPathway  |
| IGKV1D-1 immunogloIGKV1D17   | 2 BCRSignalingPathway  |
| IGKV1D-3 immunogloIGKV1D33   | 2 BCRSignalingPathway  |
| IGKV1D-3 immunogloIGKV1D37   | 2 BCRSignalingPathway  |
| IGKV1D-3 immunogloIGKV1D39   | 2 BCRSignalingPathway  |
| IGKV1D-4 immunogloIGKV1D42   | 2 BCRSignalingPathway  |
| IGKV1D-4 immunogloIGKV1D43   | 2 BCRSignalingPathway  |
| IGKV1D-8 immunogloIGKV1D8    | 2 BCRSignalingPathway  |
| IGKV2-24 immunogloA23 IGKV   | 2 BCRSignalingPathway  |
| IGKV2-28 immunogloA19 IGKV   | 2 BCRSignalingPathway  |
| IGKV2-30 immunogloA17 IGKV   | 2 BCRSignalingPathway  |
| IGKV2-40 immunogloIGKV240 C  | 2 BCRSignalingPathway  |
| IGKV2D-2 immunogloA7 IGKV2   | 2 BCRSignalingPathway  |
| IGKV2D-2 immunogloA3 IGKV2   | 2 BCRSignalingPathway  |
| IGKV2D-2 immunogloA2a A2c IC | 2 BCRSignalingPathway  |
| IGKV2D-3 immunogloA1 IGKV2   | 2 BCRSignalingPathway  |
| IGKV2D-4 immunogloIGKV2D40   | 2 BCRSignalingPathway  |
| IGKV3-11 immunogloIGKV311 L  | 2 BCRSignalingPathway  |
| IGKV3-15 immunogloIGKV315 L  | 2 BCRSignalingPathway  |
| IGKV3-20 immunoglo13K18 A27  | 2 BCRSignalingPathway  |
| IGKV3-7 immunogloIGKV37 L1   | 2 BCRSignalingPathway  |
| IGKV3D-1 immunogloIGKV3D11   | 2 BCRSignalingPathway  |
| IGKV3D-1 immunogloIGKV3D15   | 2 BCRSignalingPathway  |
| IGKV3D-2 immunogloA11 A11a I | 2 BCRSignalingPathway  |
| IGKV3D-7 immunogloIGKV3D7    | 2 BCRSignalingPathway  |
| IGKV4-1 immunogloB3 IGKV4    | 2 BCRSignalingPathway  |



|           |                       |    |                     |
|-----------|-----------------------|----|---------------------|
| IGKV5-2   | immunogloB2 IGKV5     | 2  | BCRSignalingPathway |
| IGKV6-21  | immunogloA26 IGKV6    | 2  | BCRSignalingPathway |
| IGKV6D-2  | immunogloA10 IGKV6    | 2  | BCRSignalingPathway |
| IGKV6D-4  | immunogloA14          | 2  | BCRSignalingPathway |
| IGL       | immunogloIGL@ IGL     | 22 | BCRSignalingPathway |
| IGLC1     | immunogloIGLC         | 22 | BCRSignalingPathway |
| IGLC2     | immunogloIGLC         | 22 | BCRSignalingPathway |
| IGLC3     | immunogloIGLC         | 22 | BCRSignalingPathway |
| IGLC6     | immunogloIGLC         | 22 | BCRSignalingPathway |
| IGLC7     | immunogloC7           | 22 | BCRSignalingPathway |
| IGLJ      | - IGLJ@               | 22 | BCRSignalingPathway |
| IGLJ1     | immunogloJ1           | 22 | BCRSignalingPathway |
| IGLJ2     | immunogloJ2           | 22 | BCRSignalingPathway |
| IGLJ3     | immunogloJ3           | 22 | BCRSignalingPathway |
| IGLJ4     | immunoglo-            | 22 | BCRSignalingPathway |
| IGLJ5     | immunoglo-            | 22 | BCRSignalingPathway |
| IGLJ6     | immunoglo-            | 22 | BCRSignalingPathway |
| IGLJ7     | immunogloJ7           | 22 | BCRSignalingPathway |
| IGLV@     | - IGLV                | 22 | BCRSignalingPathway |
| IGLV1-36  | immunogloIGLV136 V    | 22 | BCRSignalingPathway |
| IGLV1-40  | immunogloIGLV140 V    | 22 | BCRSignalingPathway |
| IGLV1-44  | immunogloIGLV144 V    | 22 | BCRSignalingPathway |
| IGLV1-47  | immunogloIGLV147 V    | 22 | BCRSignalingPathway |
| IGLV1-50  | immunogloIGLV150 V    | 22 | BCRSignalingPathway |
| IGLV1-51  | immunogloIGLV151 V    | 22 | BCRSignalingPathway |
| IGLV10-54 | immunogloIGLV1054     | 22 | BCRSignalingPathway |
| IGLV11-55 | immunogloIGLV1155     | 22 | BCRSignalingPathway |
| IGLV2-11  | immunogloIGLV211 V    | 22 | BCRSignalingPathway |
| IGLV2-14  | immunogloIGLV214 V    | 22 | BCRSignalingPathway |
| IGLV2-18  | immunogloIGLV218 V    | 22 | BCRSignalingPathway |
| IGLV2-23  | immunogloIGLV223 V    | 22 | BCRSignalingPathway |
| IGLV2-33  | immunogloIGLV233 V    | 22 | BCRSignalingPathway |
| IGLV2-8   | immunogloIGLV28 V1    | 22 | BCRSignalingPathway |
| IGLV3-1   | immunogloIGLV31 V2    | 22 | BCRSignalingPathway |
| IGLV3-10  | immunogloIGLV310 V    | 22 | BCRSignalingPathway |
| IGLV3-12  | immunogloIGLV312 V    | 22 | BCRSignalingPathway |
| IGLV3-16  | immunogloIGLV316 V    | 22 | BCRSignalingPathway |
| IGLV3-19  | immunogloIGLV319 V    | 22 | BCRSignalingPathway |
| IGLV3-21  | immunogloIGLV321 V    | 22 | BCRSignalingPathway |
| IGLV3-22  | immunogloIGLV322 V    | 22 | BCRSignalingPathway |
| IGLV3-25  | immunogloIGLV325 V    | 22 | BCRSignalingPathway |
| IGLV3-27  | immunogloIGLV327 V    | 22 | BCRSignalingPathway |
| IGLV3-32  | immunogloIGLV332 V    | 22 | BCRSignalingPathway |
| IGLV3-9   | immunogloIGLV39 V2    | 22 | BCRSignalingPathway |
| IGLV4-3   | immunogloIGLV43 V2    | 22 | BCRSignalingPathway |
| IGLV4-60  | immunogloIGLV460 V    | 22 | BCRSignalingPathway |
| IGLV4-69  | immunogloIGLV469 V    | 22 | BCRSignalingPathway |
| IGLV5-37  | immunogloIGLV537 V    | 22 | BCRSignalingPathway |
| IGLV5-39  | immunogloIGLV539      | 22 | BCRSignalingPathway |
| IGLV5-45  | immunogloIGLV545 V    | 22 | BCRSignalingPathway |
| IGLV5-48  | immunogloIGLV548 V    | 22 | BCRSignalingPathway |
| IGLV5-52  | immunogloIGLV552 V    | 22 | BCRSignalingPathway |
| IGLV6-57  | immunogloIGLV657 V    | 22 | BCRSignalingPathway |
| IGLV7-43  | immunogloIGLV743 V    | 22 | BCRSignalingPathway |
| IGLV7-46  | immunogloIGLV746 V    | 22 | BCRSignalingPathway |
| IGLV8-61  | immunogloIGLV861 V    | 22 | BCRSignalingPathway |
| IGLV9-49  | immunogloIGLV949 V    | 22 | BCRSignalingPathway |
| C3        | complemenAHUS5 AR     | 19 | Chemokines          |
| C5        | complemenC5D C5a C    | 9  | Chemokines          |
| CAMP      | cathelicidinCAP-18 CA | 3  | Chemokines          |

|          |                        |               |
|----------|------------------------|---------------|
| CCL1     | C-C motif cI-309 P500  | 17 Chemokines |
| CCL11    | C-C motif cSCYA11      | 17 Chemokines |
| CCL13    | C-C motif cCKb10 MC    | 17 Chemokines |
| CCL14    | C-C motif cCC-1 CC-3   | 17 Chemokines |
| CCL15-CC | CCCL15-CCCCL15 HC      | 17 Chemokines |
| CCL15    | C-C motif cHCC-2 HM    | 17 Chemokines |
| CCL16    | C-C motif cCKb12 HC    | 17 Chemokines |
| CCL17    | C-C motif cA-152E5.3   | 16 Chemokines |
| CCL18    | C-C motif cAMAC-1 A    | 17 Chemokines |
| CCL19    | C-C motif cCKb11 ELC   | 9 Chemokines  |
| CCL2     | C-C motif cGDCF-2 H    | 17 Chemokines |
| CCL20    | C-C motif cCKb4 Exod   | 2 Chemokines  |
| CCL21    | C-C motif c6CKine CK   | 9 Chemokines  |
| CCL22    | C-C motif cA-152E5.1   | 16 Chemokines |
| CCL23    | C-C motif cCK-BETA-    | 17 Chemokines |
| CCL24    | C-C motif cCkb-6 MPI   | 7 Chemokines  |
| CCL25    | C-C motif cCkb15 SCY   | 19 Chemokines |
| CCL26    | C-C motif cIMAC MIP    | 7 Chemokines  |
| CCL27    | C-C motif cALP CTAC    | 9 Chemokines  |
| CCL28    | C-C motif cCCK1 MEC    | 5 Chemokines  |
| CCL3     | C-C motif cG0S19-1 L   | 17 Chemokines |
| CCL3L1   | C-C motif c464.2 D17S  | 17 Chemokines |
| CCL3P1   | C-C motif cCCL3L2 G    | 17 Chemokines |
| CCL3L3   | C-C motif c464.2 D17S  | 17 Chemokines |
| CCL4     | C-C motif cACT2 AT7    | 17 Chemokines |
| CCL4L2   | C-C motif cAT744.2 C   | 17 Chemokines |
| CCL4L1   | C-C motif cAT744.2 C   | 17 Chemokines |
| CCL5     | C-C motif cD17S136E    | 17 Chemokines |
| CCL7     | C-C motif cFIC MARC    | 17 Chemokines |
| CCL8     | C-C motif cHC14 MCP    | 17 Chemokines |
| CKLF     | chemokine C32 CKLF     | 16 Chemokines |
| CMA1     | chymase 1 CYH MCT      | 14 Chemokines |
| CTSG     | cathepsin GCATG CG     | 14 Chemokines |
| CX3CL1   | C-X3-C mcABCD-3 C      | 16 Chemokines |
| CXCL1    | C-X-C mot FSP GRO1     | 4 Chemokines  |
| CXCL10   | C-X-C mot C7 IF110 IN  | 4 Chemokines  |
| CXCL11   | C-X-C mot H174 I-TA    | 4 Chemokines  |
| CXCL12   | C-X-C mot IRH PBSF     | 10 Chemokines |
| CXCL13   | C-X-C mot ANGIE AN     | 4 Chemokines  |
| CXCL14   | C-X-C mot BMAC BR      | 5 Chemokines  |
| CXCL16   | C-X-C mot CXCLG16      | 17 Chemokines |
| CXCL17   | C-X-C mot DMC Dcip     | 19 Chemokines |
| CXCL2    | C-X-C mot CINC-2a G    | 4 Chemokines  |
| CXCL3    | C-X-C mot CINC-2b G    | 4 Chemokines  |
| CXCL5    | C-X-C mot ENA-78 SC    | 4 Chemokines  |
| CXCL6    | C-X-C mot CKA-3 GC     | 4 Chemokines  |
| CXCL9    | C-X-C mot CMK Humi     | 4 Chemokines  |
| CCN1     | cellular conCYR61 GIC  | 1 Chemokines  |
| DEFA1    | defensin al DEF1 DEF   | 8 Chemokines  |
| DEFA3    | defensin al DEF3 HNP   | 8 Chemokines  |
| DEFA5    | defensin al DEF5 HD-   | 8 Chemokines  |
| DEFB1    | defensin be BD1 DEFB   | 8 Chemokines  |
| DEFB103B | defensin be BD-3 DEFI  | 8 Chemokines  |
| DEFB104A | defensin be BD-4 DEFI  | 8 Chemokines  |
| DEFB4A   | defensin be BD-2 DEFI  | 8 Chemokines  |
| EDN1     | endothelin ARCND3 E    | 6 Chemokines  |
| EDN2     | endothelin .ET-2 ET2 F | 1 Chemokines  |
| EDN3     | endothelin .ET-3 ET3 F | 20 Chemokines |
| FGF10    | fibroblast g-          | 5 Chemokines  |
| FGF2     | fibroblast gBFGF FGF   | 4 Chemokines  |

|         |                         |                        |
|---------|-------------------------|------------------------|
| HTN3    | histatin 3 HIS2 HTN3    | 4 Chemokines           |
| CXCL8   | C-X-C mot GCP-1 GCI     | 4 Chemokines           |
| LECT2   | leukocyte cchm-II chm   | 5 Chemokines           |
| PF4     | platelet factCXCL4 PF   | 4 Chemokines           |
| PF4V1   | platelet factCXCL4L1    | 4 Chemokines           |
| PLAU    | plasminogeATF BDPL      | 10 Chemokines          |
| PPBP    | pro-plateletB-TG1 Beta  | 4 Chemokines           |
| PPBPP1  | pro-plateletPPBPL1 TC   | 4 Chemokines           |
| PROK2   | prokineticirBV8 HH4 f   | 3 Chemokines           |
| RNASE2  | ribonucleasEDN RAF3     | 14 Chemokines          |
| SAA1    | serum amy PIG4 SAA      | 11 Chemokines          |
| SAA2    | serum amy SAA SAA1      | 11 Chemokines          |
| SBDS    | SBDS ribosCGI-97 SD     | 7 Chemokines           |
| SEMA3A  | semaphorinCOLL1 HH      | 7 Chemokines           |
| SEMA3B  | semaphorinLUCA-1 SI     | 3 Chemokines           |
| SEMA3C  | semaphorinSEMAE Se      | 7 Chemokines           |
| SEMA3D  | semaphorinSema-Z2 cc    | 7 Chemokines           |
| SEMA3E  | semaphorinM-SEMAH       | 7 Chemokines           |
| SEMA3F  | semaphorinSEMA-IV s     | 3 Chemokines           |
| SEMA3G  | semaphorin sem2         | 3 Chemokines           |
| SEMA4A  | semaphorinCORD10 R      | 1 Chemokines           |
| SEMA4B  | semaphorinSEMAC Se      | 15 Chemokines          |
| SEMA4C  | semaphorinM-SEMA-I      | 2 Chemokines           |
| SEMA4D  | semaphorinA8 BB18 C     | 9 Chemokines           |
| SEMA4F  | ssemaphori M-SEMA F     | 2 Chemokines           |
| SEMA4G  | semaphorin -            | 10 Chemokines          |
| SEMA5A  | semaphorinSEMAF ser     | 5 Chemokines           |
| SEMA5B  | semaphorinSEMAG Se      | 3 Chemokines           |
| SEMA6A  | semaphorinHT018 SEM     | 5 Chemokines           |
| SEMA6B  | semaphorinEPM11 SE      | 19 Chemokines          |
| SEMA6C  | semaphorinSEMAY m-      | 1 Chemokines           |
| SEMA6D  | semaphorin -            | 15 Chemokines          |
| SEMA7A  | semaphorinCD108 CD-     | 15 Chemokines          |
| SLIT1   | slit guidancMEGF4 SL    | 10 Chemokines          |
| SLIT2   | slit guidancSLIL3 Slit- | 4 Chemokines           |
| TNC     | tenascin C 150-225 DF   | 9 Chemokines           |
| TYMP    | thymidine r ECGF ECG    | 22 Chemokines          |
| XCL1    | X-C motif c ATAC LPT    | 1 Chemokines           |
| XCL2    | X-C motif c SCM-1b SC   | 1 Chemokines           |
| C5AR1   | complemenC5A C5AR       | 19 Chemokine_Receptors |
| ACKR2   | atypical chc CCBP2 CC   | 3 Chemokine_Receptors  |
| CCR1    | C-C motif c CD191 CK    | 3 Chemokine_Receptors  |
| CCR10   | C-C motif c GPR2        | 17 Chemokine_Receptors |
| CCR3    | C-C motif c C C CKR3    | 3 Chemokine_Receptors  |
| CCR4    | C-C motif c CC-CKR-4    | 3 Chemokine_Receptors  |
| CCR5    | C-C motif c CC-CKR-5    | 3 Chemokine_Receptors  |
| CCR6    | C-C motif c BN-1 C-C (  | 6 Chemokine_Receptors  |
| CCR7    | C-C motif c BLR2 CC-(   | 17 Chemokine_Receptors |
| CCR8    | C-C motif c CC-CKR-8    | 3 Chemokine_Receptors  |
| CCR9    | C-C motif c CC-CKR-9    | 3 Chemokine_Receptors  |
| ACKR4   | atypical chc CC-CKR-1   | 3 Chemokine_Receptors  |
| CCRL2   | C-C motif c ACKR5 CK    | 3 Chemokine_Receptors  |
| CMKLR1  | chemerin c CHEMERI      | 12 Chemokine_Receptors |
| CX3CR1  | C-X3-C mc CCRL1 CM      | 3 Chemokine_Receptors  |
| CXCR3   | C-X-C mot CD182 CD X    | Chemokine_Receptors    |
| CXCR4   | C-X-C mot CD184 D2s     | 2 Chemokine_Receptors  |
| CXCR5   | C-X-C mot BLR1 CD1      | 11 Chemokine_Receptors |
| CXCR6   | C-X-C mot BONZO CI      | 3 Chemokine_Receptors  |
| ACKR3   | atypical chc CMKOR1 C   | 2 Chemokine_Receptors  |
| CYSLTR1 | cysteiny  le CYSLT1 C X | Chemokine_Receptors    |

|         |                      |                  |                        |
|---------|----------------------|------------------|------------------------|
| CYSLTR2 | cysteinyl leucyl     | CYSLTR2 C        | 13 Chemokine_Receptors |
| ACKR1   | atypical chemokine   | ACKR1 CD         | 1 Chemokine_Receptors  |
| EDNRA   | endothelin A         | EDNRA ETA        | 4 Chemokine_Receptors  |
| EDNRB   | endothelin B         | EDNRB ETB        | 13 Chemokine_Receptors |
| FPR1    | formyl peptide       | FPR1 FPR         | 19 Chemokine_Receptors |
| FPR2    | formyl peptide       | FPR2 FMR         | 19 Chemokine_Receptors |
| FPR2    | formyl peptide       | FPR2 FMR         | 19 Chemokine_Receptors |
| GPR17   | G protein-coupled    | GPR17 GPR        | 2 Chemokine_Receptors  |
| GPR32   | G protein-coupled    | GPR32 GPR        | 19 Chemokine_Receptors |
| GPR33   | G protein-coupled    | GPR33 GPR        | 14 Chemokine_Receptors |
| PTGDR2  | prostaglandin        | PTGDR2 CR        | 11 Chemokine_Receptors |
| C5AR2   | complement           | C5AR2 GPF        | 19 Chemokine_Receptors |
| CXCR1   | C-X-C motif          | CXCR1 C-C-C      | 2 Chemokine_Receptors  |
| CXCR2   | C-X-C motif          | CXCR2 CD         | 2 Chemokine_Receptors  |
| LTB4R   | leukotriene          | LTB4R BLT        | 14 Chemokine_Receptors |
| LTB4R2  | leukotriene          | LTB4R2 BLT       | 14 Chemokine_Receptors |
| PLAUR   | plasminogen          | PLAUR U-PA       | 19 Chemokine_Receptors |
| PLXNA1  | plexin A1            | PLXNA1 NOV       | 3 Chemokine_Receptors  |
| PLXNA2  | plexin A2            | PLXNA2 PLXN      | 1 Chemokine_Receptors  |
| PLXNA3  | plexin A3            | PLXNA3 HSSEX     | Chemokine_Receptors    |
| PLXNA4  | plexin A4            | PLXNA4 FAYV2820  | 7 Chemokine_Receptors  |
| PLXNB1  | plexin B1            | PLXNB1 PLEXIN-B  | 3 Chemokine_Receptors  |
| PLXNB2  | plexin B2            | PLXNB2 Nblat     | 22 Chemokine_Receptors |
| PLXNB3  | plexin B3            | PLXNB3 P X       | Chemokine_Receptors    |
| PLXNC1  | plexin C1            | PLXNC1 PL        | 12 Chemokine_Receptors |
| PLXND1  | plexin D1            | PLXND1 PLEXD1    | 3 Chemokine_Receptors  |
| PTAFR   | platelet activation  | PTAFR PAFR       | 1 Chemokine_Receptors  |
| ROBO1   | roundabout           | ROBO1 SA         | 3 Chemokine_Receptors  |
| ROBO2   | roundabout           | ROBO2 SAX3       | 3 Chemokine_Receptors  |
| ROBO3   | roundabout           | ROBO3 HGPPS HG   | 11 Chemokine_Receptors |
| RXFP3   | relaxin family       | RXFP3 GPCR135 I  | 5 Chemokine_Receptors  |
| XCR1    | X-C motif            | XCR1 C           | 3 Chemokine_Receptors  |
| ADIPOQ  | adiponectin          | ADIPOQ ACI       | 3 Cytokines            |
| ADM     | adrenomedullary      | ADM PAMP         | 11 Cytokines           |
| ADM2    | adrenomedullary      | ADM2 dJ579       | 22 Cytokines           |
| AGRP    | agouti related       | AGRP AR          | 16 Cytokines           |
| AGT     | angiotensin          | AGT ANHU SEF     | 1 Cytokines            |
| AMBN    | ameloblastin         | AMBN AIF         | 4 Cytokines            |
| AMELX   | amelogenin           | AMELX AIH1 X     | Cytokines              |
| AMH     | anti-Müllerian       | AMH MIF MIS      | 19 Cytokines           |
| ANGPTL5 | angiopoietin         | ANGPTL5 -        | 11 Cytokines           |
| ANGPTL7 | angiopoietin         | ANGPTL7 AngX CDT | 1 Cytokines            |
| APLN    | apelin               | APLN XNP X       | Cytokines              |
| AREG    | amphiregulin         | AREG AREG        | 4 Cytokines            |
| MANF    | mesencephalic        | MANF ARMET A     | 3 Cytokines            |
| CDNF    | cerebral dopamine    | CDNF ARMETL1     | 10 Cytokines           |
| ARTN    | artemin              | ARTN ENO         | 1 Cytokines            |
| AVP     | arginine vasopressin | AVP ADH ARV      | 20 Cytokines           |
| AZU1    | azurocidin           | AZU1 AZAMP A     | 19 Cytokines           |
| BDNF    | brain derived        | BDNF ANON2 BU    | 11 Cytokines           |
| BMP1    | bone morphogenetic   | BMP1 OI13 PCOL   | 8 Cytokines            |
| BMP10   | bone morphogenetic   | BMP10 -          | 2 Cytokines            |
| BMP15   | bone morphogenetic   | BMP15 GDF9B OE X | Cytokines              |
| BMP2    | bone morphogenetic   | BMP2 BDA2 BMI    | 20 Cytokines           |
| BMP3    | bone morphogenetic   | BMP3 BMP-3A      | 4 Cytokines            |
| BMP4    | bone morphogenetic   | BMP4 BMP2B BM    | 14 Cytokines           |
| BMP5    | bone morphogenetic   | BMP5 -           | 6 Cytokines            |
| BMP6    | bone morphogenetic   | BMP6 VGR VGR     | 6 Cytokines            |
| BMP7    | bone morphogenetic   | BMP7 OP-1        | 20 Cytokines           |
| BMP8A   | bone morphogenetic   | BMP8A OP-2       | 1 Cytokines            |



|          |                       |              |
|----------|-----------------------|--------------|
| BMP8B    | bone morpl BMP8 OP2   | 1 Cytokines  |
| BTC      | betacellulin -        | 4 Cytokines  |
| MYDGF    | myeloid de C19orf10 E | 19 Cytokines |
| C3       | complemenAHUS5 AR     | 19 Cytokines |
| C5       | complemenC5D C5a C    | 9 Cytokines  |
| CALCA    | calcitonin rCALC1 CG  | 11 Cytokines |
| CALCB    | calcitonin rCALC2 CG  | 11 Cytokines |
| CAMP     | cathelicidinCAP-18 CA | 3 Cytokines  |
| CAT      | catalase -            | 11 Cytokines |
| CCK      | cholecystok-          | 3 Cytokines  |
| CCL1     | C-C motif cI-309 P500 | 17 Cytokines |
| CCL11    | C-C motif cSCYA11     | 17 Cytokines |
| CCL13    | C-C motif cCKb10 MC   | 17 Cytokines |
| CCL14    | C-C motif cCC-1 CC-3  | 17 Cytokines |
| CCL15-CC | CCL15-CCCCL15 HC      | 17 Cytokines |
| CCL15    | C-C motif cHCC-2 HM   | 17 Cytokines |
| CCL16    | C-C motif cCKb12 HC   | 17 Cytokines |
| CCL17    | C-C motif cA-152E5.3  | 16 Cytokines |
| CCL18    | C-C motif cAMAC-1 A   | 17 Cytokines |
| CCL19    | C-C motif cCKb11 ELC  | 9 Cytokines  |
| CCL2     | C-C motif cGDCF-2 H   | 17 Cytokines |
| CCL20    | C-C motif cCKb4 Exod  | 2 Cytokines  |
| CCL21    | C-C motif c6Ckine CK  | 9 Cytokines  |
| CCL22    | C-C motif cA-152E5.1  | 16 Cytokines |
| CCL23    | C-C motif cCK-BETA-   | 17 Cytokines |
| CCL24    | C-C motif cCkb-6 MPI  | 7 Cytokines  |
| CCL25    | C-C motif cCkb15 SCY  | 19 Cytokines |
| CCL26    | C-C motif cIMAC MIP   | 7 Cytokines  |
| CCL27    | C-C motif cALP CTAC   | 9 Cytokines  |
| CCL28    | C-C motif cCCK1 MEC   | 5 Cytokines  |
| CCL3     | C-C motif cG0S19-1 L  | 17 Cytokines |
| CCL3L1   | C-C motif c464.2 D17S | 17 Cytokines |
| CCL3P1   | C-C motif cCCL3L2 G   | 17 Cytokines |
| CCL3L3   | C-C motif c464.2 D17S | 17 Cytokines |
| CCL4     | C-C motif cACT2 AT7-  | 17 Cytokines |
| CCL4L2   | C-C motif cAT744.2 C  | 17 Cytokines |
| CCL4L1   | C-C motif cAT744.2 C  | 17 Cytokines |
| CCL5     | C-C motif cD17S136E   | 17 Cytokines |
| CCL7     | C-C motif cFIC MARC   | 17 Cytokines |
| CCL8     | C-C motif cHC14 MCP   | 17 Cytokines |
| CD320    | CD320 mol8D6 8D6A     | 19 Cytokines |
| CD40LG   | CD40 liganCD154 CD-X  | Cytokines    |
| CD70     | CD70 moleCD27-L CI    | 19 Cytokines |
| ADA2     | adenosine cADGF CEC   | 22 Cytokines |
| CER1     | cerberus 1, DAND4     | 9 Cytokines  |
| CGA      | glycoprotei CG-ALPH/  | 6 Cytokines  |
| CGB3     | chorionic g-CGB CGB   | 19 Cytokines |
| CGB1     | chorionic g-          | 19 Cytokines |
| CGB2     | chorionic g-          | 19 Cytokines |
| CGB5     | chorionic g-CGB HCG   | 19 Cytokines |
| CGB7     | chorionic g-CG-beta-a | 19 Cytokines |
| CGB8     | chorionic g-          | 19 Cytokines |
| CHGA     | chromograr CGA        | 14 Cytokines |
| CHGB     | chromograr SCG1       | 20 Cytokines |
| CKLF     | chemokine C32 CKLF    | 16 Cytokines |
| CLCF1    | cardiotrophBSF-3 BSF  | 11 Cytokines |
| CLEC11A  | C-type lectiCLECSF3 I | 19 Cytokines |
| CMA1     | chymase 1 CYH MCT     | 14 Cytokines |
| CMTM1    | CKLF like CKLFH CK    | 16 Cytokines |
| CMTM2    | CKLF like CKLFSF2     | 16 Cytokines |

|          |                         |              |
|----------|-------------------------|--------------|
| CMTM3    | CKLF like BNAS2 CK      | 16 Cytokines |
| CMTM4    | CKLF like CKLFSF4       | 16 Cytokines |
| CMTM5    | CKLF like CKLFSF5       | 14 Cytokines |
| CMTM6    | CKLF like CKLFSF6 I     | 3 Cytokines  |
| CMTM7    | CKLF like CKLFSF7       | 3 Cytokines  |
| CMTM8    | CKLF like CKLFSF8 C     | 3 Cytokines  |
| CNTF     | ciliary neur HCNTF      | 11 Cytokines |
| CORT     | cortistatin CST-14 CS   | 1 Cytokines  |
| CRH      | corticotropiCRF CRH1    | 8 Cytokines  |
| CSF1     | colony stimCSF-1 MC3    | 1 Cytokines  |
| CSF2     | colony stimCSF GMC3     | 5 Cytokines  |
| CSF3     | colony stimC17orf33 C   | 17 Cytokines |
| CSH1     | chorionic sCS-1 CSA C   | 17 Cytokines |
| CSH2     | chorionic sCS-2 CSB C   | 17 Cytokines |
| CSHL1    | chorionic sCS-5 CSHF    | 17 Cytokines |
| CSPG5    | chondroitin NGC         | 3 Cytokines  |
| CTF1     | cardiotroph CT-1 CT1    | 16 Cytokines |
| CCN2     | cellular conCTGF HCS    | 6 Cytokines  |
| CTSG     | cathepsin GCATG CG      | 14 Cytokines |
| CX3CL1   | C-X3-C mcABCD-3 C       | 16 Cytokines |
| CXCL1    | C-X-C mot FSP GRO1      | 4 Cytokines  |
| CXCL10   | C-X-C mot C7 IF110 IN   | 4 Cytokines  |
| CXCL11   | C-X-C mot H174 I-TA0    | 4 Cytokines  |
| CXCL12   | C-X-C mot IRH PBSF      | 10 Cytokines |
| CXCL13   | C-X-C mot ANGIE AN      | 4 Cytokines  |
| CXCL14   | C-X-C mot BMAC BR       | 5 Cytokines  |
| CXCL16   | C-X-C mot CXCLG16       | 17 Cytokines |
| CXCL17   | C-X-C mot DMC Deip      | 19 Cytokines |
| CXCL2    | C-X-C mot CINC-2a G     | 4 Cytokines  |
| CXCL3    | C-X-C mot CINC-2b G     | 4 Cytokines  |
| CXCL5    | C-X-C mot ENA-78 SC     | 4 Cytokines  |
| CXCL6    | C-X-C mot CKA-3 GC      | 4 Cytokines  |
| CXCL9    | C-X-C mot CMK Humi      | 4 Cytokines  |
| CCN1     | cellular conCYR61 GIC   | 1 Cytokines  |
| DEFA1    | defensin alDEF1 DEF     | 8 Cytokines  |
| DEFA3    | defensin alDEF3 HNP     | 8 Cytokines  |
| DEFA5    | defensin alDEF5 HD-4    | 8 Cytokines  |
| DEFB1    | defensin beBD1 DEFB     | 8 Cytokines  |
| DEFB103B | defensin beBD-3 DEFI    | 8 Cytokines  |
| DEFB104A | defensin beBD-4 DEFI    | 8 Cytokines  |
| DEFB4A   | defensin beBD-2 DEFI    | 8 Cytokines  |
| DKK1     | dickkopf WDKK-1 SK      | 10 Cytokines |
| EBI3     | Epstein-BaIL-27B IL2    | 19 Cytokines |
| EDN1     | endothelin ARCND3 E     | 6 Cytokines  |
| EDN2     | endothelin .ET-2 ET2 F  | 1 Cytokines  |
| EDN3     | endothelin .ET-3 ET3 F  | 20 Cytokines |
| EGF      | epidermal gHOMG4 U      | 4 Cytokines  |
| EPGN     | epithelial mALGV3072    | 4 Cytokines  |
| EPO      | erythroipoieDBAL ECY    | 7 Cytokines  |
| EREG     | epiregulin EPR ER Ep    | 4 Cytokines  |
| ESM1     | endothelial endocan     | 5 Cytokines  |
| FAM3B    | FAM3 met:2-21 C21or     | 21 Cytokines |
| FAM3C    | FAM3 met:GS3786 IL      | 7 Cytokines  |
| FAM3D    | FAM3 met:EF7 OIT1       | 3 Cytokines  |
| FASLG    | Fas ligand ALPS1B A     | 1 Cytokines  |
| FGF1     | fibroblast gAFGF ECG    | 5 Cytokines  |
| FGF10    | fibroblast g -          | 5 Cytokines  |
| FGF11    | fibroblast gFGF-11 FH   | 17 Cytokines |
| FGF12    | fibroblast gEIEE47 FG   | 3 Cytokines  |
| FGF13    | fibroblast gFGF-13 FG X | Cytokines    |

|        |                         |              |
|--------|-------------------------|--------------|
| FGF14  | fibroblast gFGF-14 FH   | 13 Cytokines |
| FGF16  | fibroblast gFGF-16 MF X | Cytokines    |
| FGF17  | fibroblast gFGF-13 FG   | 8 Cytokines  |
| FGF18  | fibroblast gFGF-18 ZF   | 5 Cytokines  |
| FGF19  | fibroblast g -          | 11 Cytokines |
| FGF2   | fibroblast gBFGF FGF    | 4 Cytokines  |
| FGF20  | fibroblast gFGF-20 RH   | 8 Cytokines  |
| FGF21  | fibroblast g -          | 19 Cytokines |
| FGF22  | fibroblast g -          | 19 Cytokines |
| FGF23  | fibroblast gADHR FGI    | 12 Cytokines |
| FGF3   | fibroblast gHBGF-3 IN   | 11 Cytokines |
| FGF4   | fibroblast gFGF-4 HBC   | 11 Cytokines |
| FGF5   | fibroblast gHBGF-5 Sr   | 4 Cytokines  |
| FGF6   | fibroblast gHBGF-6 H    | 12 Cytokines |
| FGF7   | fibroblast gHBGF-7 K    | 15 Cytokines |
| FGF8   | fibroblast gAIGF FGF-   | 10 Cytokines |
| FGF9   | fibroblast gFGF-9 GAI   | 13 Cytokines |
| VEGFD  | vascular enFIGF VEG X   | Cytokines    |
| FIGNL2 | fidgetin lik-           | 12 Cytokines |
| FLT3LG | fms related FL FLG3L    | 19 Cytokines |
| FSHB   | follicle stim HH24      | 11 Cytokines |
| GAL    | galanin andETL8 GAL     | 11 Cytokines |
| GALP   | galanin like-           | 19 Cytokines |
| GAST   | gastrin GAS             | 17 Cytokines |
| GCG    | glucagon GLP-1 GLI      | 2 Cytokines  |
| GDF1   | growth diffCERS1 CH     | 19 Cytokines |
| GDF10  | growth diffBIP BMP-3    | 10 Cytokines |
| GDF11  | growth diffBMP-11 BM    | 12 Cytokines |
| GDF15  | growth diffGDF-15 M     | 19 Cytokines |
| GDF2   | growth diffBMP-9 BM     | 10 Cytokines |
| GDF3   | growth diffKFS3 MCC     | 12 Cytokines |
| GDF5   | growth diffBDA1C BM     | 20 Cytokines |
| GDF6   | growth diffBMP-13 BM    | 8 Cytokines  |
| GDF7   | growth diff BMP12       | 2 Cytokines  |
| GDF9   | growth diff POF14       | 5 Cytokines  |
| GDNF   | glial cell deATF ATF1   | 5 Cytokines  |
| GH1    | growth horiGH GH-N C    | 17 Cytokines |
| GH2    | growth horiGH-V GHE     | 17 Cytokines |
| GHRH   | growth horiGHRF GRF     | 20 Cytokines |
| GHRL   | ghrelin and MTLRP       | 3 Cytokines  |
| GIP    | gastric inhil-          | 17 Cytokines |
| GKN1   | gastrokine AMP18 BR     | 2 Cytokines  |
| GMFB   | glia matura GMF         | 14 Cytokines |
| GMFG   | glia matura GMF-GAM     | 19 Cytokines |
| GNRH1  | gonadotrop GNRH GR      | 8 Cytokines  |
| GNRH2  | gonadotrop GnRH-II L    | 20 Cytokines |
| GPHA2  | glycoprotei A2 GPA2 Z   | 11 Cytokines |
| GPHB5  | glycoprotei B5 GPB5 Z   | 14 Cytokines |
| GPI    | glucose-6-pAMF GNPI     | 19 Cytokines |
| GREM1  | gremlin 1, IC15DUPq C   | 15 Cytokines |
| GREM2  | gremlin 2, ICKTSF1B2    | 1 Cytokines  |
| GRN    | granulin prCLN11 GE     | 17 Cytokines |
| GRP    | gastrin rele:BN GRP-1(C | 18 Cytokines |
| GUCA2A | guanylate cGCAP-I GU    | 1 Cytokines  |
| HAMP   | hepcidin anHEPC HFE     | 19 Cytokines |
| HBEGF  | heparin binDTR DTS I    | 5 Cytokines  |
| HDGF   | heparin bin HMG1L2      | 1 Cytokines  |
| HDGFL3 | HDGF like CGI-142 H     | 15 Cytokines |
| HGF    | hepatocyte DFNB39 F-    | 7 Cytokines  |
| HTN3   | histatin 3 HIS2 HTN2    | 4 Cytokines  |

|        |                                    |              |
|--------|------------------------------------|--------------|
| IAPP   | islet amyloid precursor protein    | 12 Cytokines |
| IFNA1  | interferon alpha 1                 | 9 Cytokines  |
| IFNA10 | interferon alpha 10                | 9 Cytokines  |
| IFNA13 | interferon alpha 13                | 9 Cytokines  |
| IFNA14 | interferon alpha 14                | 9 Cytokines  |
| IFNA16 | interferon alpha 16                | 9 Cytokines  |
| IFNA17 | interferon alpha 17                | 9 Cytokines  |
| IFNA2  | interferon alpha 2                 | 9 Cytokines  |
| IFNA21 | interferon alpha 21                | 9 Cytokines  |
| IFNA4  | interferon alpha 4                 | 9 Cytokines  |
| IFNA5  | interferon alpha 5                 | 9 Cytokines  |
| IFNA6  | interferon alpha 6                 | 9 Cytokines  |
| IFNA7  | interferon alpha 7                 | 9 Cytokines  |
| IFNA8  | interferon alpha 8                 | 9 Cytokines  |
| IFNB1  | interferon beta                    | 9 Cytokines  |
| IFNE   | interferon epsilon                 | 9 Cytokines  |
| IFNG   | interferon gamma                   | 12 Cytokines |
| IFNK   | interferon kappa                   | 9 Cytokines  |
| IFNW1  | interferon omega                   | 9 Cytokines  |
| IGF1   | insulin-like growth factor 1       | 12 Cytokines |
| IGF2   | insulin-like growth factor 2       | 11 Cytokines |
| IL10   | interleukin 10                     | 1 Cytokines  |
| IL11   | interleukin 11                     | 19 Cytokines |
| IL12A  | interleukin 12 subunit alpha       | 3 Cytokines  |
| IL12B  | interleukin 12 subunit beta        | 5 Cytokines  |
| IL13   | interleukin 13                     | 5 Cytokines  |
| IL15   | interleukin 15                     | 4 Cytokines  |
| IL16   | interleukin 16                     | 15 Cytokines |
| IL17A  | interleukin 17 subunit alpha       | 6 Cytokines  |
| IL17B  | interleukin 17 subunit beta        | 5 Cytokines  |
| IL17C  | interleukin 17 subunit gamma       | 16 Cytokines |
| IL17D  | interleukin 17 subunit delta       | 13 Cytokines |
| IL17F  | interleukin 17 subunit epsilon     | 6 Cytokines  |
| IL18   | interleukin 18                     | 11 Cytokines |
| IL19   | interleukin 19                     | 1 Cytokines  |
| IL1A   | interleukin 1 subunit alpha        | 2 Cytokines  |
| IL1B   | interleukin 1 subunit beta         | 2 Cytokines  |
| IL1F10 | interleukin 1 family member 10     | 2 Cytokines  |
| IL36RN | interleukin 36 receptor antagonist | 2 Cytokines  |
| IL36A  | interleukin 36 subunit alpha       | 2 Cytokines  |
| IL37   | interleukin 37                     | 2 Cytokines  |
| IL36B  | interleukin 36 subunit beta        | 2 Cytokines  |
| IL36G  | interleukin 36 subunit gamma       | 2 Cytokines  |
| IL1RN  | interleukin 1 receptor antagonist  | 2 Cytokines  |
| IL2    | interleukin 2                      | 4 Cytokines  |
| IL20   | interleukin 20                     | 1 Cytokines  |
| IL21   | interleukin 21                     | 4 Cytokines  |
| IL22   | interleukin 22                     | 12 Cytokines |
| IL23A  | interleukin 23 subunit alpha       | 12 Cytokines |
| IL24   | interleukin 24                     | 1 Cytokines  |
| IL25   | interleukin 25                     | 14 Cytokines |
| IL26   | interleukin 26                     | 12 Cytokines |
| IL27   | interleukin 27                     | 16 Cytokines |
| IFNL2  | interferon lambda 2                | 19 Cytokines |
| IFNL3  | interferon lambda 3                | 19 Cytokines |
| IFNL1  | interferon lambda 1                | 19 Cytokines |
| IL3    | interleukin 3                      | 5 Cytokines  |
| IL31   | interleukin 31                     | 12 Cytokines |
| IL32   | interleukin 32                     | 16 Cytokines |
| IL33   | interleukin 33                     | 9 Cytokines  |



|          |                         |              |
|----------|-------------------------|--------------|
| IL34     | interleukin C16orf77 II | 16 Cytokines |
| IL4      | interleukin BCGF-1 BC   | 5 Cytokines  |
| IL5      | interleukin EDF IL-5 T  | 5 Cytokines  |
| IL6      | interleukin BSF-2 BSF   | 7 Cytokines  |
| IL6ST    | interleukin CD130 CD    | 5 Cytokines  |
| IL7      | interleukin IL-7        | 8 Cytokines  |
| CXCL8    | C-X-C mot GCP-1 GCI     | 4 Cytokines  |
| IL9      | interleukin HP40 IL-9   | 5 Cytokines  |
| INHBA    | inhibin sub-            | 2 Cytokines  |
| INHBA    | inhibin sub EDF FRP     | 7 Cytokines  |
| INHBB    | inhibin sub-            | 2 Cytokines  |
| INHBC    | inhibin sub IHBC        | 12 Cytokines |
| INHBE    | inhibin sub-            | 12 Cytokines |
| INS      | insulin IDDM IDD        | 11 Cytokines |
| INS-IGF2 | INS-IGF2 r INSIGF       | 11 Cytokines |
| INSL3    | insulin like RLF RLNL   | 19 Cytokines |
| INSL4    | insulin like EPIL PLAC  | 9 Cytokines  |
| INSL5    | insulin like PRO182 U1  | 1 Cytokines  |
| INSL6    | insulin like RIF1       | 9 Cytokines  |
| JAG1     | jagged canc AGS AGS1    | 20 Cytokines |
| JAG2     | jagged canc HJ2 SER2    | 14 Cytokines |
| FGF7P6   | fibroblast g KGFLP1     | 9 Cytokines  |
| FGF7P3   | fibroblast g KGFLP2     | 9 Cytokines  |
| KITLG    | KIT ligand DCUA DF1     | 12 Cytokines |
| KL       | klotho HFTC3            | 13 Cytokines |
| LACRT    | lacritin -              | 12 Cytokines |
| LECT2    | leukocyte c chm-II chm  | 5 Cytokines  |
| LEFTY1   | left-right d LEFTB LE   | 1 Cytokines  |
| LEFTY2   | left-right d EBAF LEF   | 1 Cytokines  |
| LEP      | leptin LEPD OB C        | 7 Cytokines  |
| LHB      | luteinizing  CGB4 HH2   | 19 Cytokines |
| LIF      | LIF interleu CDF DIA F  | 22 Cytokines |
| LRSAM1   | leucine rich CMT2P RI   | 9 Cytokines  |
| LTA      | lymphotoxi LT TNFB T    | 6 Cytokines  |
| LTB      | lymphotoxi TNFC TNF     | 6 Cytokines  |
| LTBP1    | latent trans-           | 2 Cytokines  |
| LTBP2    | latent trans C14orf141  | 14 Cytokines |
| LTBP3    | latent trans DASS GPH   | 11 Cytokines |
| LTBP4    | latent trans ARCL1C L   | 19 Cytokines |
| MDK      | midkine ARAP MK         | 11 Cytokines |
| MIA      | MIA SH3 d CD-RAP        | 19 Cytokines |
| MIF      | macrophag GIF GLIF M    | 22 Cytokines |
| MLN      | motilin -               | 6 Cytokines  |
| MSTN     | myostatin GDF8 MSL      | 2 Cytokines  |
| NAMPT    | nicotinamic 1110035O1   | 7 Cytokines  |
| NDP      | norrin cysti EVR2 FEV X | Cytokines    |
| NENF     | neudesin ne CIR2 SCIR   | 1 Cytokines  |
| NGF      | nerve grow Beta-NGF I   | 1 Cytokines  |
| NMB      | neuromedir -            | 15 Cytokines |
| NODAL    | nodal grow HTX5         | 10 Cytokines |
| CCN3     | cellular con IBP-9 IGFE | 8 Cytokines  |
| NPFF     | neuropeptic FMRFAL      | 12 Cytokines |
| NPPA     | natriuretic  ANF ANP    | 1 Cytokines  |
| NPPB     | natriuretic  BNP        | 1 Cytokines  |
| NPPC     | natriuretic  CNP CNP2   | 2 Cytokines  |
| NPY      | neuropeptic PYY4        | 7 Cytokines  |
| NRG1     | neuregulin ARIA GGF     | 8 Cytokines  |
| NRG2     | neuregulin  DON1 HRC    | 5 Cytokines  |
| NRG3     | neuregulin  HRG3 pro-   | 10 Cytokines |
| NRG4     | neuregulin  HRG4        | 15 Cytokines |

|         |                                              |            |              |
|---------|----------------------------------------------|------------|--------------|
| NRTN    | neurturin                                    | NTN        | 19 Cytokines |
| NTF3    | neurotrophin                                 | HDNF NG1   | 12 Cytokines |
| NTF4    | neurotrophin                                 | GLC10 GL   | 19 Cytokines |
| NTS     | neurotensin                                  | NMN-125    | 12 Cytokines |
| NUDT6   | nucleoside diphosphate-linked moiety H motif | 6          | 4 Cytokines  |
| OGN     | osteoglycin                                  | OG OIF SL  | 9 Cytokines  |
| OSGIN1  | oxidative stress-binding protein             | BDGI OKL   | 16 Cytokines |
| OSM     | oncostatin M                                 |            | 22 Cytokines |
| OSTN    | osteocrin                                    | MUSCLIN    | 3 Cytokines  |
| OXT     | oxytocin                                     | neOT OT-NP | 20 Cytokines |
| ENDOU   | endonuclein                                  | P11 PP11 P | 12 Cytokines |
| PDGFA   | platelet-derived growth factor               | PDGF-A PI  | 7 Cytokines  |
| PDGFB   | platelet-derived growth factor               | PDGF-B PD  | 22 Cytokines |
| PDGFC   | platelet-derived growth factor               | FALLOTE    | 4 Cytokines  |
| PDGFD   | platelet-derived growth factor               | IEGF MST   | 11 Cytokines |
| PDGFRA  | platelet-derived growth factor receptor      | CD140A PI  | 4 Cytokines  |
| PDGFRB  | platelet-derived growth factor receptor      | CD140B IE  | 5 Cytokines  |
| PDGFRL  | platelet-derived growth factor receptor      | PDGRL PR   | 8 Cytokines  |
| PDYN    | prodynorphin                                 | ADCA PEN   | 20 Cytokines |
| PENK    | proenkephalin                                | PENK-1     | 8 Cytokines  |
| PF4     | platelet factor 4                            | CXCL4 PF   | 4 Cytokines  |
| PF4V1   | platelet factor 4 variant 1                  | CXCL4L1    | 4 Cytokines  |
| PGF     | placental growth factor                      | D12S1900   | 14 Cytokines |
| PLAU    | plasminogen activator                        | ATF BDPL   | 10 Cytokines |
| PMCH    | pro-melanin-concentrating hormone            | MCH ppM    | 12 Cytokines |
| PNOC    | prepronociceptin                             | N/OFQ NO   | 8 Cytokines  |
| POMC    | proopiomelanocortin                          | ACTH CLI   | 2 Cytokines  |
| PPBP    | pro-platelet factor 4                        | B-TG1 Bet  | 4 Cytokines  |
| PPBPP1  | pro-platelet factor 4                        | PPBPL1 TC  | 4 Cytokines  |
| PPBPP2  | pro-platelet factor 4                        | PPBPL2 SF  | 4 Cytokines  |
| PPY     | pancreatic polypeptide                       | PNP PP     | 17 Cytokines |
| PRL     | prolactin                                    | GHA1       | 6 Cytokines  |
| PRLH    | prolactin receptor                           | PRH PRRP   | 2 Cytokines  |
| PROK1   | prokineticin 1                               | EGVEGF P   | 1 Cytokines  |
| PROK2   | prokineticin 2                               | BV8 HH4 f  | 3 Cytokines  |
| PSPN    | persephin                                    | PSP        | 19 Cytokines |
| PTH     | parathyroid hormone                          | FIH1 PTH1  | 11 Cytokines |
| PTH2    | parathyroid hormone                          | TIP39      | 19 Cytokines |
| PTHLH   | parathyroid hormone-like hormone             | BDE2 HHM   | 12 Cytokines |
| PTN     | pleiotrophin                                 | HARP HB-   | 7 Cytokines  |
| PYY     | peptide YY                                   | YYPY-1 PYY | 17 Cytokines |
| QRFP    | pyroglutamate                                | 26RFa P51  | 9 Cytokines  |
| RABEP1  | rabaptin                                     | RAB5EP R   | 17 Cytokines |
| RABEP2  | rabaptin                                     | RAB5EP R   | 16 Cytokines |
| REG1A   | regenerating factor                          | ICRF P19 P | 2 Cytokines  |
| RETN    | resistin                                     | ADSF FIZZ  | 19 Cytokines |
| RETNLB  | resistin-like protein                        | FIZZ1 FIZZ | 3 Cytokines  |
| RLN1    | relaxin 1                                    | H1 H1RLX   | 9 Cytokines  |
| RLN2    | relaxin 2                                    | H2 H2-RL   | 9 Cytokines  |
| RLN3    | relaxin 3                                    | H3 RXXN3 Z | 19 Cytokines |
| RNASE2  | ribonuclease                                 | EDN RAF3   | 14 Cytokines |
| S100A6  | S100 calcium-binding protein                 | 2A9 5B10 C | 1 Cytokines  |
| SAA1    | serum amyloid A                              | PIG4 SAA   | 11 Cytokines |
| SAA2    | serum amyloid A                              | SAA SAA1   | 11 Cytokines |
| SBDS    | SBDS ribonuclease                            | CGI-97 SD  | 7 Cytokines  |
| SCG2    | secretogranin                                | CHGC EM    | 2 Cytokines  |
| SCGB3A1 | secretoglobulin                              | HIN-1 HIN  | 5 Cytokines  |
| SCT     | secretin                                     | -          | 11 Cytokines |
| AIMP1   | aminoacyl tRNA                               | EMAP2 EM   | 4 Cytokines  |
| SECTM1  | secreted phospholipase                       | K12 SECT   | 17 Cytokines |

|          |                         |              |
|----------|-------------------------|--------------|
| SEMA3A   | semaphorinCOLL1 HH      | 7 Cytokines  |
| SEMA3B   | semaphorinLUCA-1 SI     | 3 Cytokines  |
| SEMA3C   | semaphorinSEMAE Se      | 7 Cytokines  |
| SEMA3D   | semaphorinSema-Z2 cc    | 7 Cytokines  |
| SEMA3E   | semaphorinM-SEMAH       | 7 Cytokines  |
| SEMA3F   | semaphorinSEMA-IV f     | 3 Cytokines  |
| SEMA3G   | semaphorin sem2         | 3 Cytokines  |
| SEMA4A   | semaphorinCORD10 R      | 1 Cytokines  |
| SEMA4B   | semaphorinSEMAC Se      | 15 Cytokines |
| SEMA4C   | semaphorinM-SEMA-I      | 2 Cytokines  |
| SEMA4D   | semaphorinA8 BB18 C     | 9 Cytokines  |
| SEMA4F   | ssemaphori M-SEMA F     | 2 Cytokines  |
| SEMA4G   | semaphorin -            | 10 Cytokines |
| SEMA5A   | semaphorinSEMAF ser     | 5 Cytokines  |
| SEMA5B   | semaphorinSEMAG Se      | 3 Cytokines  |
| SEMA6A   | semaphorinHT018 SEM     | 5 Cytokines  |
| SEMA6B   | semaphorinEPM11 SE      | 19 Cytokines |
| SEMA6C   | semaphorinSEMAY m-      | 1 Cytokines  |
| SEMA6D   | semaphorin -            | 15 Cytokines |
| SEMA7A   | semaphorinCD108 CD-     | 15 Cytokines |
| SLIT1    | slit guidancMEGF4 SL    | 10 Cytokines |
| SLIT2    | slit guidancSLIL3 Slit- | 4 Cytokines  |
| SLURP1   | secreted LYANUP ARs     | 8 Cytokines  |
| SPP1     | secreted ph.BNSP BSP    | 4 Cytokines  |
| SST      | somatostati SMST        | 3 Cytokines  |
| STC1     | stanniocalc: STC        | 8 Cytokines  |
| STC2     | stanniocalc: STC-2 STC  | 5 Cytokines  |
| TAC1     | tachykinin jHs.2563 NF  | 7 Cytokines  |
| TDGF1    | teratocarcinCR CR-1 C   | 3 Cytokines  |
| TDGF1P3  | teratocarcinCR-3 CRIP X | Cytokines    |
| TG       | thyroglobulAITD3 TG     | 8 Cytokines  |
| TGFA     | transformin TFGA        | 2 Cytokines  |
| TGFB1    | transforminCED DPD1     | 19 Cytokines |
| TGFB2    | transforminG-TSF LDs    | 1 Cytokines  |
| TGFB3    | transforminARVD AR'     | 14 Cytokines |
| THPO     | thrombopoiMGDF MK       | 3 Cytokines  |
| TNC      | tenascin C 150-225 DF   | 9 Cytokines  |
| TNF      | tumor necrDIF TNF-a     | 6 Cytokines  |
| TNFRSF11 | TNF receptOCIF OPG      | 8 Cytokines  |
| TNFSF10  | TNF superfAPO2L Ap      | 3 Cytokines  |
| TNFSF11  | TNF superfCD254 OD      | 13 Cytokines |
| TNFSF12  | TNF superfAPO3L DR      | 17 Cytokines |
| TNFSF13  | TNF superfAPRIL CD-     | 17 Cytokines |
| TNFSF13B | TNF superfBAFF BLY      | 13 Cytokines |
| TNFSF14  | TNF superfCD258 HV      | 19 Cytokines |
| TNFSF15  | TNF superfTL1 TL1A      | 9 Cytokines  |
| TNFSF18  | TNF superfAITRL GIT     | 1 Cytokines  |
| TNFSF4   | TNF superfCD134L CI     | 1 Cytokines  |
| TNFSF8   | TNF superfCD153 CD-     | 9 Cytokines  |
| TNFSF9   | TNF superf4-1BB-L C     | 19 Cytokines |
| TOR2A    | torsin famil TORP1      | 9 Cytokines  |
| TRH      | thyrotropin Pro-TRH T-  | 3 Cytokines  |
| TSHB     | thyroid stinTSH-B TSH   | 1 Cytokines  |
| TSLP     | thymic stro- -          | 5 Cytokines  |
| TXLNA    | taxilin alph.IL14 TXLN  | 1 Cytokines  |
| TYMP     | thymidine jECGF ECG     | 22 Cytokines |
| UCN      | urocortin UI UROC       | 2 Cytokines  |
| UCN2     | urocortin 2 SRP UCN-    | 3 Cytokines  |
| UCN3     | urocortin 3 SCP SPC U   | 10 Cytokines |
| UTS2     | urotensin 2 PRO1068 L   | 1 Cytokines  |

|         |                        |                       |
|---------|------------------------|-----------------------|
| UTS2B   | urotensin 2 U2B URP U  | 3 Cytokines           |
| VEGFA   | vascular en MVCD1 V    | 6 Cytokines           |
| VEGFB   | vascular en VEGFL VR   | 11 Cytokines          |
| VEGFC   | vascular en Flt4-L LMF | 4 Cytokines           |
| VEGF    | VEGF nerve SCG7 SgV    | 7 Cytokines           |
| VIP     | vasoactive i PHM27     | 6 Cytokines           |
| XCL1    | X-C motif c ATAC LPT   | 1 Cytokines           |
| XCL2    | X-C motif c SCM-1b SC  | 1 Cytokines           |
| ACVR1B  | activin A re ACTRIB A  | 12 Cytokine_Receptors |
| ACVR1C  | activin A re ACVRLK7   | 2 Cytokine_Receptors  |
| ACVR2A  | activin A re ACTRII AC | 2 Cytokine_Receptors  |
| ACVR2B  | activin A re ACTRIIB A | 3 Cytokine_Receptors  |
| ACVRL1  | activin A re ACVRLK1   | 12 Cytokine_Receptors |
| ADCYAP1 | ADCYAP i PAC1 PAC      | 7 Cytokine_Receptors  |
| ADIPOR1 | adiponectin ACDCR1 C   | 1 Cytokine_Receptors  |
| ADIPOR2 | adiponectin ACDCR2 P   | 12 Cytokine_Receptors |
| ADRB1   | adrenocept ADRB1R E    | 10 Cytokine_Receptors |
| ADRB2   | adrenocept ADRB2R A    | 5 Cytokine_Receptors  |
| AGTR1   | angiotensin AG2S AGT   | 3 Cytokine_Receptors  |
| AGTR2   | angiotensin AT2 ATGR X | Cytokine_Receptors    |
| AMHR2   | anti-Muller AMHR MI    | 12 Cytokine_Receptors |
| ANGPT1  | angiopoieti AGP1 AGP   | 8 Cytokine_Receptors  |
| ANGPT4  | angiopoieti ANG3 ANC   | 20 Cytokine_Receptors |
| ANGPTL1 | angiopoieti ANG3 ANC   | 1 Cytokine_Receptors  |
| ANGPTL2 | angiopoieti ARP2 HAR   | 9 Cytokine_Receptors  |
| ANGPTL3 | angiopoieti ANG-5 AN   | 1 Cytokine_Receptors  |
| ANGPTL4 | angiopoieti ARP4 FIAF  | 19 Cytokine_Receptors |
| ANGPTL6 | angiopoieti AGF ARP5   | 19 Cytokine_Receptors |
| APLNR   | apelin rece AGTRL1 A   | 11 Cytokine_Receptors |
| AR      | androgen re AIS AR8 DX | Cytokine_Receptors    |
| AVPR1A  | arginine va AVPR V1a   | 12 Cytokine_Receptors |
| AVPR1B  | arginine va AVPR3 V1   | 1 Cytokine_Receptors  |
| AVPR2   | arginine va ADHR DI1 X | Cytokine_Receptors    |
| BMPR1A  | bone morpl 10q23del A  | 10 Cytokine_Receptors |
| BMPR1B  | bone morpl ALK-6 AL    | 4 Cytokine_Receptors  |
| BMPR2   | bone morpl BMPR-II B   | 2 Cytokine_Receptors  |
| BRD8    | bromodom SMAP SM       | 5 Cytokine_Receptors  |
| C3AR1   | complemen AZ3B C3A     | 12 Cytokine_Receptors |
| C5AR1   | complemen C5A C5AR     | 19 Cytokine_Receptors |
| CALCR   | calcitonin r CRT CT-R  | 7 Cytokine_Receptors  |
| CALCRL  | calcitonin r CGRPR CR  | 2 Cytokine_Receptors  |
| ACKR2   | atypical ch CCBP2 CC   | 3 Cytokine_Receptors  |
| CCR1    | C-C motif c CD191 CK   | 3 Cytokine_Receptors  |
| CCR10   | C-C motif c GPR2       | 17 Cytokine_Receptors |
| CCR3    | C-C motif c C C CKR3   | 3 Cytokine_Receptors  |
| CCR4    | C-C motif c CC-CKR-4   | 3 Cytokine_Receptors  |
| CCR5    | C-C motif c CC-CKR-5   | 3 Cytokine_Receptors  |
| CCR6    | C-C motif c BN-1 C-C C | 6 Cytokine_Receptors  |
| CCR7    | C-C motif c BLR2 CC-C  | 17 Cytokine_Receptors |
| CCR8    | C-C motif c CC-CKR-8   | 3 Cytokine_Receptors  |
| CCR9    | C-C motif c CC-CKR-9   | 3 Cytokine_Receptors  |
| ACKR4   | atypical ch CC-CKR-1   | 3 Cytokine_Receptors  |
| CCRL2   | C-C motif c ACKR5 CK   | 3 Cytokine_Receptors  |
| CD40    | CD40 mole Bp50 CDW     | 20 Cytokine_Receptors |
| CMKLR1  | chemerin c CHEMERI     | 12 Cytokine_Receptors |
| CNTFR   | ciliary neur -         | 9 Cytokine_Receptors  |
| CRHR1   | corticotropi CRF-R CR  | 17 Cytokine_Receptors |
| CRHR2   | corticotropi CRF-RB C  | 7 Cytokine_Receptors  |
| CRIM1   | cysteine ric CRIM-1 S5 | 2 Cytokine_Receptors  |
| CRLF1   | cytokine re CISS CISS  | 19 Cytokine_Receptors |

|         |                         |                       |
|---------|-------------------------|-----------------------|
| CRLF2   | cytokine reCRL2 CRL X Y | Cytokine_Receptors    |
| CRLF3   | cytokine reCREME-9      | 17 Cytokine_Receptors |
| CSF1R   | colony stimBANDDO       | 5 Cytokine_Receptors  |
| CSF2RA  | colony stimCD116 CD X Y | Cytokine_Receptors    |
| CSF2RB  | colony stimCD131 CD     | 22 Cytokine_Receptors |
| CSF3R   | colony stimCD114 GC     | 1 Cytokine_Receptors  |
| CX3CR1  | C-X3-C mcCCRL1 CM       | 3 Cytokine_Receptors  |
| CXCR3   | C-X-C mot CD182 CD X    | Cytokine_Receptors    |
| CXCR4   | C-X-C mot CD184 D2      | 2 Cytokine_Receptors  |
| CXCR5   | C-X-C mot BLR1 CD1      | 11 Cytokine_Receptors |
| CXCR6   | C-X-C mot BONZO CI      | 3 Cytokine_Receptors  |
| ACKR3   | atypical chcCMKOR1 C    | 2 Cytokine_Receptors  |
| CYSLTR1 | cysteiny l eCYSLT1 C X  | Cytokine_Receptors    |
| CYSLTR2 | cysteiny l eCYSLT2 C    | 13 Cytokine_Receptors |
| ACKR1   | atypical chcCCBP1 CD    | 1 Cytokine_Receptors  |
| EDNRA   | endothelin 1 ET-A ETA   | 4 Cytokine_Receptors  |
| EDNRB   | endothelin 1 ABCDS ET   | 13 Cytokine_Receptors |
| EGFR    | epidermal gERBB ERE     | 7 Cytokine_Receptors  |
| ENG     | endoglin END HHT1       | 9 Cytokine_Receptors  |
| EPOR    | erythropeie EPO-R       | 19 Cytokine_Receptors |
| ESR1    | estrogen reER ESR ES    | 6 Cytokine_Receptors  |
| ESR2    | estrogen reER-BETA      | 14 Cytokine_Receptors |
| ESRRA   | estrogen reERR1 ERR     | 11 Cytokine_Receptors |
| ESRRB   | estrogen reDFNB35 E     | 14 Cytokine_Receptors |
| ESRRG   | estrogen reERR-gamr     | 1 Cytokine_Receptors  |
| FGFR1   | fibroblast gBFGFR CD    | 8 Cytokine_Receptors  |
| FGFR2   | fibroblast gBBDS BEK    | 10 Cytokine_Receptors |
| FGFR3   | fibroblast gACH CD33    | 4 Cytokine_Receptors  |
| FGFR4   | fibroblast gCD334 JTK   | 5 Cytokine_Receptors  |
| FGFRL1  | fibroblast gFGFR-5 FC   | 4 Cytokine_Receptors  |
| FLT1    | fms related FLT FLT-1   | 13 Cytokine_Receptors |
| FLT3    | fms related CD135 FL    | 13 Cytokine_Receptors |
| FLT4    | fms related CHTD7 FL    | 5 Cytokine_Receptors  |
| FPR1    | formyl peptFMLP FPR     | 19 Cytokine_Receptors |
| FPR2    | formyl peptALXR FMI     | 19 Cytokine_Receptors |
| FPR2    | formyl peptALXR FMI     | 19 Cytokine_Receptors |
| FSHR    | follicle stirFSHR1 FSI  | 2 Cytokine_Receptors  |
| GALR2   | galanin recGAL2-R G     | 17 Cytokine_Receptors |
| GALR3   | galanin rec-            | 22 Cytokine_Receptors |
| GCGR    | glucagon reGGR GL-R     | 17 Cytokine_Receptors |
| GHR     | growth horiGHBP GHI     | 5 Cytokine_Receptors  |
| GHRHR   | growth horiGHRFR GF     | 7 Cytokine_Receptors  |
| GHSR    | growth horiGHDP         | 3 Cytokine_Receptors  |
| GIPR    | gastric inhilPGQTL2     | 19 Cytokine_Receptors |
| GLP1R   | glucagon lilGLP-1 GLF   | 6 Cytokine_Receptors  |
| GLP2R   | glucagon lil-           | 17 Cytokine_Receptors |
| GNRHR   | gonadotrop GNRHR1 C     | 4 Cytokine_Receptors  |
| GPER1   | G protein-c CEPR CM     | 7 Cytokine_Receptors  |
| GPR17   | G protein-c -           | 2 Cytokine_Receptors  |
| GPR32   | G protein-c RVDR1       | 19 Cytokine_Receptors |
| GPR33   | G protein-c -           | 14 Cytokine_Receptors |
| PTGDR2  | prostaglandCD294 CR     | 11 Cytokine_Receptors |
| C5AR2   | complemenC5L2 GPF7      | 19 Cytokine_Receptors |
| HNF4A   | hepatocyte FRTS4 HN     | 20 Cytokine_Receptors |
| HNF4G   | hepatocyte NR2A2 NR     | 8 Cytokine_Receptors  |
| HTR3A   | 5-hydroxyti5-HT-3 5-H   | 11 Cytokine_Receptors |
| HTR3B   | 5-hydroxyti5-HT3B       | 11 Cytokine_Receptors |
| HTR3C   | 5-hydroxyti-            | 3 Cytokine_Receptors  |
| HTR3D   | 5-hydroxyti5HT3D        | 3 Cytokine_Receptors  |
| HTR3E   | 5-hydroxyti5-HT3-E 5-   | 3 Cytokine_Receptors  |

|         |                                        |                       |
|---------|----------------------------------------|-----------------------|
| IFNAR1  | interferon aAVP IFN-a                  | 21 Cytokine_Receptors |
| IFNAR2  | interferon aIFN-R IFN-                 | 21 Cytokine_Receptors |
| IFNGR1  | interferon gCD119 IFN                  | 6 Cytokine_Receptors  |
| IFNGR2  | interferon gAF-1 IFGR                  | 21 Cytokine_Receptors |
| IGF1R   | insulin like CD221 IGF                 | 15 Cytokine_Receptors |
| IGF2R   | insulin like CD222 CI-                 | 6 Cytokine_Receptors  |
| IL10RA  | interleukin CD210 CD                   | 11 Cytokine_Receptors |
| IL10RB  | interleukin CDW210B                    | 21 Cytokine_Receptors |
| IL11RA  | interleukin CRSDA                      | 9 Cytokine_Receptors  |
| IL12RB1 | interleukin CD212 IL-                  | 19 Cytokine_Receptors |
| IL12RB2 | interleukin -                          | 1 Cytokine_Receptors  |
| IL13RA1 | interleukin CD213A1 CX                 | Cytokine_Receptors    |
| IL13RA2 | interleukin CD213A2 CX                 | Cytokine_Receptors    |
| IL15RA  | interleukin CD215                      | 10 Cytokine_Receptors |
| IL2RB   | interleukin CD122 IL1                  | 22 Cytokine_Receptors |
| IL17RA  | interleukin CANDF5 C                   | 22 Cytokine_Receptors |
| IL17RB  | interleukin CRL4 EVI2                  | 3 Cytokine_Receptors  |
| IL17RC  | interleukin CANDF9 II                  | 3 Cytokine_Receptors  |
| IL17RD  | interleukin HH18 IL-1'                 | 3 Cytokine_Receptors  |
| IL17RE  | interleukin -                          | 3 Cytokine_Receptors  |
| IL18R1  | interleukin CD218a CI                  | 2 Cytokine_Receptors  |
| IL18RAP | interleukin ACPL CD2                   | 2 Cytokine_Receptors  |
| IL1R1   | interleukin CD121A D                   | 2 Cytokine_Receptors  |
| IL1R2   | interleukin CD121b CI                  | 2 Cytokine_Receptors  |
| IL1RAP  | interleukin C3orf13 IL-                | 3 Cytokine_Receptors  |
| IL1RL1  | interleukin DER4 FIT-                  | 2 Cytokine_Receptors  |
| IL1RL2  | interleukin IL-1Rrp2 II                | 2 Cytokine_Receptors  |
| IL20RA  | interleukin CRF2-8 IL-                 | 6 Cytokine_Receptors  |
| IL20RB  | interleukin DIRS1 FNI                  | 3 Cytokine_Receptors  |
| IL21R   | interleukin CD360 IMI                  | 16 Cytokine_Receptors |
| IL22RA1 | interleukin CRF2-9 IL-                 | 1 Cytokine_Receptors  |
| IL22RA2 | interleukin CRF2-10 C                  | 6 Cytokine_Receptors  |
| IL23R   | interleukin -                          | 1 Cytokine_Receptors  |
| IL27RA  | interleukin CRL1 IL-2'                 | 19 Cytokine_Receptors |
| IFNLR1  | interferon l:CRF2/12 IF                | 1 Cytokine_Receptors  |
| IL2RA   | interleukin CD25 IDDI                  | 10 Cytokine_Receptors |
| IL2RB   | interleukin CD122 IL1                  | 22 Cytokine_Receptors |
| IL2RG   | interleukin CD132 CIE X                | Cytokine_Receptors    |
| IL31RA  | interleukin CRL CRL3                   | 5 Cytokine_Receptors  |
| IL3RA   | interleukin CD123 IL3 X Y              | Cytokine_Receptors    |
| IL4R    | interleukin CD124 IL-                  | 16 Cytokine_Receptors |
| IL5RA   | interleukin CD125 CD                   | 3 Cytokine_Receptors  |
| IL6R    | interleukin CD126 IL-                  | 1 Cytokine_Receptors  |
| IL7R    | interleukin CD127 CD                   | 5 Cytokine_Receptors  |
| CXCR1   | C-X-C mot C-C C-C-C                    | 2 Cytokine_Receptors  |
| CXCR2   | C-X-C mot CD182 CD                     | 2 Cytokine_Receptors  |
| IL9R    | interleukin CD129 IL- <sup>1</sup> X Y | Cytokine_Receptors    |
| INSR    | insulin receCD220 HH                   | 19 Cytokine_Receptors |
| KDR     | kinase inseCD309 FLF                   | 4 Cytokine_Receptors  |
| LEPR    | leptin recepCD295 LEI                  | 1 Cytokine_Receptors  |
| LGR4    | leucine richBNMD17 C                   | 11 Cytokine_Receptors |
| LGR5    | leucine richFEX GPR4                   | 12 Cytokine_Receptors |
| LGR6    | leucine richGPCR VTS                   | 1 Cytokine_Receptors  |
| LHCGR   | luteinizing HHG LCGI                   | 2 Cytokine_Receptors  |
| LIFR    | LIF receptoCD118 LIF                   | 5 Cytokine_Receptors  |
| LTB4R   | leukotriene BLT1 BLT                   | 14 Cytokine_Receptors |
| LTB4R2  | leukotriene BLT2 BLT                   | 14 Cytokine_Receptors |
| LTBR    | lymphotoxiD12S370 L                    | 12 Cytokine_Receptors |
| MC1R    | melanocort CMM5 MS                     | 16 Cytokine_Receptors |
| MC2R    | melanocort: ACTHR                      | 18 Cytokine_Receptors |

|        |                           |                       |
|--------|---------------------------|-----------------------|
| MC3R   | melanocort:BMQ9 MC        | 20 Cytokine_Receptors |
| MC4R   | melanocort:BMQ20          | 18 Cytokine_Receptors |
| MCHR1  | melanin cor:GPR24 MC      | 22 Cytokine_Receptors |
| MCHR2  | melanin cor:GPR145 GI     | 6 Cytokine_Receptors  |
| MET    | MET proto-AUTS9 DF        | 7 Cytokine_Receptors  |
| MLNR   | motilin rec:GPR38 MT      | 13 Cytokine_Receptors |
| MPL    | MPL proto-C-MPL CD        | 1 Cytokine_Receptors  |
| MTNR1A | melatonin r:MEL-1A-R      | 4 Cytokine_Receptors  |
| MTNR1B | melatonin r:FGQTL2 N      | 11 Cytokine_Receptors |
| NGFR   | nerve grow:CD271 Gp8      | 17 Cytokine_Receptors |
| NMBR   | neuromedir:BB1 BB1R       | 6 Cytokine_Receptors  |
| NPR1   | natriuretic r:ANPRA A1    | 1 Cytokine_Receptors  |
| NPR3   | natriuretic r:ANP-C AN    | 5 Cytokine_Receptors  |
| NR0B1  | nuclear rec:AHC AHC X     | Cytokine_Receptors    |
| NR0B2  | nuclear rec:SHPI SHPI     | 1 Cytokine_Receptors  |
| NR1D1  | nuclear rec:EAR1 REV      | 17 Cytokine_Receptors |
| NR1D2  | nuclear rec:BD73 EAR      | 3 Cytokine_Receptors  |
| NR1H2  | nuclear rec:LXR-b LXI     | 19 Cytokine_Receptors |
| NR1H3  | nuclear rec:LXR-a LXI     | 11 Cytokine_Receptors |
| NR1H4  | nuclear rec:BAR FXR       | 12 Cytokine_Receptors |
| NR1I2  | nuclear rec:BXR ONR       | 3 Cytokine_Receptors  |
| NR1I3  | nuclear rec:CAR CAR       | 1 Cytokine_Receptors  |
| NR2C1  | nuclear rec:TR2           | 12 Cytokine_Receptors |
| NR2C2  | nuclear rec:TAK1 TR4      | 3 Cytokine_Receptors  |
| NR2E1  | nuclear rec:TLL TLX >     | 6 Cytokine_Receptors  |
| NR2E3  | nuclear rec:ESCS PNR      | 15 Cytokine_Receptors |
| NR2F1  | nuclear rec:BBOAS BE      | 5 Cytokine_Receptors  |
| NR2F2  | nuclear rec:ARP-1 ARI     | 15 Cytokine_Receptors |
| NR2F6  | nuclear rec:EAR-2 EAI     | 19 Cytokine_Receptors |
| NR3C1  | nuclear rec:GCCR GCI      | 5 Cytokine_Receptors  |
| NR3C2  | nuclear rec:MCR MLR       | 4 Cytokine_Receptors  |
| NR4A1  | nuclear rec:GFRP1 HM      | 12 Cytokine_Receptors |
| NR4A2  | nuclear rec:HZF-3 NO      | 2 Cytokine_Receptors  |
| NR4A3  | nuclear rec:CHN CSM       | 9 Cytokine_Receptors  |
| NR5A1  | nuclear rec:AD4BP EL      | 9 Cytokine_Receptors  |
| NR5A2  | nuclear rec:B1F B1F2 C    | 1 Cytokine_Receptors  |
| NR6A1  | nuclear rec:CT150 GCI     | 9 Cytokine_Receptors  |
| NRP1   | neuropilin 1:BDCA4 CI     | 10 Cytokine_Receptors |
| NRP2   | neuropilin 2:NP2 NPN2     | 2 Cytokine_Receptors  |
| OGFR   | opioid grow-              | 20 Cytokine_Receptors |
| OPRD1  | opioid rece:DOP DOR       | 1 Cytokine_Receptors  |
| OPRK1  | opioid rece:K-OR-1 KC     | 8 Cytokine_Receptors  |
| OPRL1  | opioid relat:KOR-3 KO     | 20 Cytokine_Receptors |
| OPRM1  | opioid rece:LMOR M-C      | 6 Cytokine_Receptors  |
| OSMR   | oncostatin 1:IL-31R-beta: | 5 Cytokine_Receptors  |
| OXTR   | oxytocin re:OT-R          | 3 Cytokine_Receptors  |
| PGR    | progesteron:NR3C3 PR      | 11 Cytokine_Receptors |
| PGRMC2 | progesteron:DG6 PMBF      | 4 Cytokine_Receptors  |
| PLAUR  | plasminoge:CD87 U-P/      | 19 Cytokine_Receptors |
| PLXNA1 | plexin A1: NOV NOV        | 3 Cytokine_Receptors  |
| PLXNA2 | plexin A2: OCT PLXN       | 1 Cytokine_Receptors  |
| PLXNA3 | plexin A3: 6.3 HSSEX X    | Cytokine_Receptors    |
| PLXNA4 | plexin A4: FAYV2820       | 7 Cytokine_Receptors  |
| PLXNB1 | plexin B1: PLEXIN-B       | 3 Cytokine_Receptors  |
| PLXNB2 | plexin B2: MM1 Nblat      | 22 Cytokine_Receptors |
| PLXNB3 | plexin B3: PLEXB3 P X     | Cytokine_Receptors    |
| PLXNC1 | plexin C1: CD232 PL>      | 12 Cytokine_Receptors |
| PLXND1 | plexin D1: PLEXD1         | 3 Cytokine_Receptors  |
| PPARA  | peroxisome:NR1C1 PP/      | 22 Cytokine_Receptors |
| PPARD  | peroxisome:FAAR NR1       | 6 Cytokine_Receptors  |



|          |               |            |                       |
|----------|---------------|------------|-----------------------|
| PPARG    | peroxisome    | CIMT1 GL   | 3 Cytokine_Receptors  |
| PRLHR    | prolactin re  | GPR10 GR   | 10 Cytokine_Receptors |
| PRLR     | prolactin re  | HPRL MF    | 5 Cytokine_Receptors  |
| PTAFR    | platelet acti | PAFR       | 1 Cytokine_Receptors  |
| PTGDR    | prostagland   | AS1 ASRT   | 14 Cytokine_Receptors |
| PTGDS    | prostagland   | L-PGDS LI  | 9 Cytokine_Receptors  |
| PTGER1   | prostagland   | EP1        | 19 Cytokine_Receptors |
| PTGER2   | prostagland   | EP2        | 14 Cytokine_Receptors |
| PTGER3   | prostagland   | EP3 EP3-I  | 1 Cytokine_Receptors  |
| PTGER4   | prostagland   | EP4 EP4R   | 5 Cytokine_Receptors  |
| PTGFR    | prostagland   | FP         | 1 Cytokine_Receptors  |
| PTH1R    | parathyroid   | EKNS PFE   | 3 Cytokine_Receptors  |
| PTH2R    | parathyroid   | PTH2       | 2 Cytokine_Receptors  |
| RARA     | retinoic aci  | NR1B1 RA   | 17 Cytokine_Receptors |
| RARB     | retinoic aci  | HAP MCO    | 3 Cytokine_Receptors  |
| RARG     | retinoic aci  | NR1B3 RA   | 12 Cytokine_Receptors |
| ROBO1    | roundabout    | DUTT1 SA   | 3 Cytokine_Receptors  |
| ROBO2    | roundabout    | SAX3       | 3 Cytokine_Receptors  |
| ROBO3    | roundabout    | HGPPS HG   | 11 Cytokine_Receptors |
| RORA     | RAR relate    | IDDECA N   | 15 Cytokine_Receptors |
| RORB     | RAR relate    | EIG15 NR1  | 9 Cytokine_Receptors  |
| RORC     | RAR relate    | IMD42 NR   | 1 Cytokine_Receptors  |
| RXFP1    | relaxin fam   | LGR7 RXF   | 4 Cytokine_Receptors  |
| RXFP2    | relaxin fam   | GPR106 GI  | 13 Cytokine_Receptors |
| RXFP3    | relaxin fam   | GPCR135 I  | 5 Cytokine_Receptors  |
| RXRA     | retinoid X r  | NR2B1      | 9 Cytokine_Receptors  |
| RXRB     | retinoid X r  | DAUDI6 H   | 6 Cytokine_Receptors  |
| RXRG     | retinoid X r  | NR2B3 RX   | 1 Cytokine_Receptors  |
| S1PR1    | sphingosine   | CD363 CH   | 1 Cytokine_Receptors  |
| S1PR2    | sphingosine   | AGR16 DF   | 19 Cytokine_Receptors |
| SCTR     | secretin rec  | SR         | 2 Cytokine_Receptors  |
| SDC1     | syndecan 1    | CD138 SD   | 2 Cytokine_Receptors  |
| SDC2     | syndecan 2    | CD362 HSI  | 8 Cytokine_Receptors  |
| SDC3     | syndecan 3    | SDCN SYN   | 1 Cytokine_Receptors  |
| SDC4     | syndecan 4    | SYND4      | 20 Cytokine_Receptors |
| SORT1    | sortilin 1    | Gp95 LDL   | 1 Cytokine_Receptors  |
| SSTR1    | somatostati   | SRIF-2 SS- | 14 Cytokine_Receptors |
| SSTR2    | somatostati   | -          | 17 Cytokine_Receptors |
| SSTR5    | somatostati   | SS-5-R     | 16 Cytokine_Receptors |
| ST2      | -             | -          | 11 Cytokine_Receptors |
| TACR1    | tachykinin r  | NK1R NKI   | 2 Cytokine_Receptors  |
| TEK      | TEK recept    | CD202B G   | 9 Cytokine_Receptors  |
| TGFBR1   | transformin   | AAT5 ACV   | 9 Cytokine_Receptors  |
| TGFBR2   | transformin   | AAT3 FAA   | 3 Cytokine_Receptors  |
| TGFBR3   | transformin   | BGCAN be   | 1 Cytokine_Receptors  |
| THRA     | thyroid hor   | AR7 CHNC   | 17 Cytokine_Receptors |
| THRB     | thyroid hor   | C-ERBA-2   | 3 Cytokine_Receptors  |
| TIE1     | tyrosine kir  | JTK14 TIE  | 1 Cytokine_Receptors  |
| TNFRSF10 | TNF recept    | APO2 CD2   | 8 Cytokine_Receptors  |
| TNFRSF10 | TNF recept    | CD262 DR   | 8 Cytokine_Receptors  |
| TNFRSF10 | TNF recept    | CD263 DC   | 8 Cytokine_Receptors  |
| TNFRSF10 | TNF recept    | CD264 DC   | 8 Cytokine_Receptors  |
| TNFRSF11 | TNF recept    | CD265 FEC  | 18 Cytokine_Receptors |
| TNFRSF12 | TNF recept    | CD266 FN   | 16 Cytokine_Receptors |
| TNFRSF13 | TNF recept    | CD267 CV   | 17 Cytokine_Receptors |
| TNFRSF13 | TNF recept    | BAFF-R B   | 22 Cytokine_Receptors |
| TNFRSF14 | TNF recept    | ATAR CD2   | 1 Cytokine_Receptors  |
| TNFRSF17 | TNF recept    | BCM BCM    | 16 Cytokine_Receptors |
| TNFRSF18 | TNF recept    | AITR CD3   | 1 Cytokine_Receptors  |
| TNFRSF19 | TNF recept    | TAJ TAJ-al | 13 Cytokine_Receptors |

|          |                                          |    |                     |
|----------|------------------------------------------|----|---------------------|
| TNFRSF1A | TNF receptor 1                           | 12 | Cytokine_Receptors  |
| TNFRSF1B | TNF receptor 2                           | 1  | Cytokine_Receptors  |
| TNFRSF25 | TNF receptor 25                          | 6  | Cytokine_Receptors  |
| TNFRSF4  | TNF receptor 4                           | 1  | Cytokine_Receptors  |
| TNFRSF6  | TNF receptor 6                           | 20 | Cytokine_Receptors  |
| TNFRSF8  | TNF receptor 8                           | 1  | Cytokine_Receptors  |
| TNFRSF9  | TNF receptor 9                           | 1  | Cytokine_Receptors  |
| TRHR     | thyrotropin releasing hormone receptor   | 8  | Cytokine_Receptors  |
| TSHR     | thyrotropin receptor                     | 14 | Cytokine_Receptors  |
| TUBB3    | tubulin beta class III                   | 16 | Cytokine_Receptors  |
| VDR      | vitamin D receptor                       | 12 | Cytokine_Receptors  |
| VIPR1    | vasoactive intestinal peptide receptor 1 | 3  | Cytokine_Receptors  |
| VIPR2    | vasoactive intestinal peptide receptor 2 | 7  | Cytokine_Receptors  |
| XCR1     | X-C motif chemokine receptor 1           | 3  | Cytokine_Receptors  |
| IFNA10   | interferon alpha 10                      | 9  | Interferons         |
| IFNA13   | interferon alpha 13                      | 9  | Interferons         |
| IFNA14   | interferon alpha 14                      | 9  | Interferons         |
| IFNA16   | interferon alpha 16                      | 9  | Interferons         |
| IFNA17   | interferon alpha 17                      | 9  | Interferons         |
| IFNA2    | interferon alpha 2                       | 9  | Interferons         |
| IFNA21   | interferon alpha 21                      | 9  | Interferons         |
| IFNA4    | interferon alpha 4                       | 9  | Interferons         |
| IFNA5    | interferon alpha 5                       | 9  | Interferons         |
| IFNA6    | interferon alpha 6                       | 9  | Interferons         |
| IFNA7    | interferon alpha 7                       | 9  | Interferons         |
| IFNA8    | interferon alpha 8                       | 9  | Interferons         |
| IFNB1    | interferon beta                          | 9  | Interferons         |
| IFNE     | interferon epsilon                       | 9  | Interferons         |
| IFNG     | interferon gamma                         | 12 | Interferons         |
| IFNK     | interferon kappa                         | 9  | Interferons         |
| IFNW1    | interferon omega                         | 9  | Interferons         |
| IFNAR2   | interferon alpha receptor 2              | 21 | Interferon_Receptor |
| IFNGR1   | interferon gamma receptor 1              | 6  | Interferon_Receptor |
| IFNGR2   | interferon gamma receptor 2              | 21 | Interferon_Receptor |
| IL11     | interleukin 11                           | 19 | Interleukins        |
| IL12A    | interleukin 12 subunit alpha             | 3  | Interleukins        |
| IL12B    | interleukin 12 subunit beta              | 5  | Interleukins        |
| IL13     | interleukin 13                           | 5  | Interleukins        |
| IL15     | interleukin 15                           | 4  | Interleukins        |
| IL16     | interleukin 16                           | 15 | Interleukins        |
| IL17A    | interleukin 17 subunit A                 | 6  | Interleukins        |
| IL17B    | interleukin 17 subunit B                 | 5  | Interleukins        |
| IL17C    | interleukin 17 subunit C                 | 16 | Interleukins        |
| IL17D    | interleukin 17 subunit D                 | 13 | Interleukins        |
| IL17F    | interleukin 17 subunit F                 | 6  | Interleukins        |
| IL18     | interleukin 18                           | 11 | Interleukins        |
| IL19     | interleukin 19                           | 1  | Interleukins        |
| IL1A     | interleukin 1 subunit alpha              | 2  | Interleukins        |
| IL1B     | interleukin 1 subunit beta               | 2  | Interleukins        |
| IL1F10   | interleukin 1 family member 10           | 2  | Interleukins        |
| IL36RN   | interleukin 36 receptor antagonist       | 2  | Interleukins        |
| IL36A    | interleukin 36 subunit A                 | 2  | Interleukins        |
| IL37     | interleukin 37                           | 2  | Interleukins        |
| IL36B    | interleukin 36 subunit B                 | 2  | Interleukins        |
| IL36G    | interleukin 36 subunit G                 | 2  | Interleukins        |
| IL1RN    | interleukin 1 receptor antagonist        | 2  | Interleukins        |
| IL2      | interleukin 2                            | 4  | Interleukins        |
| IL20     | interleukin 20                           | 1  | Interleukins        |
| IL21     | interleukin 21                           | 4  | Interleukins        |

|         |                           |                          |
|---------|---------------------------|--------------------------|
| IL22    | interleukin IL-21 IL-22   | 12 Interleukins          |
| IL23A   | interleukin IL-23 IL-23   | 12 Interleukins          |
| IL24    | interleukin C49A FISP     | 1 Interleukins           |
| IL25    | interleukin IL17E         | 14 Interleukins          |
| IL26    | interleukin AK155 IL-     | 12 Interleukins          |
| IL27    | interleukin IL-27 IL-27   | 16 Interleukins          |
| IFNL2   | interferon l:IL-28A IL2   | 19 Interleukins          |
| IFNL3   | interferon l:IFN-lambd:   | 19 Interleukins          |
| IFNL1   | interferon l:IL-29 IL29   | 19 Interleukins          |
| IL3     | interleukin IL-3 MCGF     | 5 Interleukins           |
| IL31    | interleukin IL-31         | 12 Interleukins          |
| IL32    | interleukin IL-32alpha    | 16 Interleukins          |
| IL33    | interleukin C9orf26 DN    | 9 Interleukins           |
| IL34    | interleukin C16orf77 II   | 16 Interleukins          |
| IL4     | interleukin BCGF-1 BC     | 5 Interleukins           |
| IL5     | interleukin EDF IL-5 T    | 5 Interleukins           |
| IL6     | interleukin BSF-2 BSF     | 7 Interleukins           |
| IL6ST   | interleukin CD130 CD      | 5 Interleukins           |
| IL7     | interleukin IL-7          | 8 Interleukins           |
| CXCL8   | C-X-C mot GCP-1 GCI       | 4 Interleukins           |
| IL9     | interleukin HP40 IL-9     | 5 Interleukins           |
| TXLNA   | taxilin alph.IL14 TXLN    | 1 Interleukins           |
| IL10RA  | interleukin CD210 CD:     | 11 Interleukins_Receptor |
| IL10RB  | interleukin CDW210B       | 21 Interleukins_Receptor |
| IL11RA  | interleukin CRSDA         | 9 Interleukins_Receptor  |
| IL12RB1 | interleukin CD212 IL-1    | 19 Interleukins_Receptor |
| IL12RB2 | interleukin -             | 1 Interleukins_Receptor  |
| IL13RA1 | interleukin CD213A1 CX    | Interleukins_Receptor    |
| IL13RA2 | interleukin CD213A2 CX    | Interleukins_Receptor    |
| IL15RA  | interleukin CD215         | 10 Interleukins_Receptor |
| IL2RB   | interleukin CD122 IL1.    | 22 Interleukins_Receptor |
| IL17RA  | interleukin CANDF5 C      | 22 Interleukins_Receptor |
| IL17RB  | interleukin CRL4 EVI2     | 3 Interleukins_Receptor  |
| IL17RC  | interleukin CANDF9 II     | 3 Interleukins_Receptor  |
| IL17RD  | interleukin HH18 IL-1'    | 3 Interleukins_Receptor  |
| IL17RE  | interleukin -             | 3 Interleukins_Receptor  |
| IL18R1  | interleukin CD218a CI     | 2 Interleukins_Receptor  |
| IL18RAP | interleukin ACPL CD2      | 2 Interleukins_Receptor  |
| IL1R1   | interleukin CD121A D.     | 2 Interleukins_Receptor  |
| IL1R2   | interleukin CD121b CI     | 2 Interleukins_Receptor  |
| IL1RAP  | interleukin C3orf13 IL-   | 3 Interleukins_Receptor  |
| IL1RL1  | interleukin DER4 FIT-     | 2 Interleukins_Receptor  |
| IL1RL2  | interleukin IL-1Rrp2 II   | 2 Interleukins_Receptor  |
| IL20RA  | interleukin CRF2-8 IL-    | 6 Interleukins_Receptor  |
| IL20RB  | interleukin DIRS1 FNI     | 3 Interleukins_Receptor  |
| IL21R   | interleukin CD360 IMI     | 16 Interleukins_Receptor |
| IL22RA1 | interleukin CRF2-9 IL-    | 1 Interleukins_Receptor  |
| IL22RA2 | interleukin CRF2-10 C     | 6 Interleukins_Receptor  |
| IL23R   | interleukin -             | 1 Interleukins_Receptor  |
| IL27RA  | interleukin CRL1 IL-2'    | 19 Interleukins_Receptor |
| IFNLR1  | interferon l:CRF2/12 IF   | 1 Interleukins_Receptor  |
| IL2RA   | interleukin CD25 IDD1     | 10 Interleukins_Receptor |
| IL2RB   | interleukin CD122 IL1     | 22 Interleukins_Receptor |
| IL2RG   | interleukin CD132 CIE X   | Interleukins_Receptor    |
| IL31RA  | interleukin CRL CRL3      | 5 Interleukins_Receptor  |
| IL3RA   | interleukin CD123 IL3 X Y | Interleukins_Receptor    |
| IL4R    | interleukin CD124 IL-     | 16 Interleukins_Receptor |
| IL5RA   | interleukin CD125 CD      | 3 Interleukins_Receptor  |
| IL6R    | interleukin CD126 IL-t    | 1 Interleukins_Receptor  |
| IL7R    | interleukin CD127 CD      | 5 Interleukins_Receptor  |

|          |                            |                                    |
|----------|----------------------------|------------------------------------|
| CXCR1    | C-X-C mot C-C C-C-C        | 2 Interleukins_Receptor            |
| CXCR2    | C-X-C mot CD182 CD         | 2 Interleukins_Receptor            |
| IL9R     | interleukin CD129 IL-9 X Y | Interleukins_Receptor              |
| ST2      | -                          | 11 Interleukins_Receptor           |
| HLA-A    | major histo HLAA           | 6 NaturalKiller_Cell_Cytotoxicity  |
| HLA-B    | major histo AS B-490       | 6 NaturalKiller_Cell_Cytotoxicity  |
| HLA-C    | major histo D6S204 HL      | 6 NaturalKiller_Cell_Cytotoxicity  |
| HLA-E    | major histo HLA-6.2 Q      | 6 NaturalKiller_Cell_Cytotoxicity  |
| HLA-G    | major histo MHC-G          | 6 NaturalKiller_Cell_Cytotoxicity  |
| KIR3DL1  | killer cell irCD158E1 K    | 19 NaturalKiller_Cell_Cytotoxicity |
| KIR3DL2  | killer cell ir3DL2 CD1:    | 19 NaturalKiller_Cell_Cytotoxicity |
| KIR2DL1  | killer cell irCD158A K     | 19 NaturalKiller_Cell_Cytotoxicity |
| KIR2DL2  | killer cell irCD158B1 C    | 19 NaturalKiller_Cell_Cytotoxicity |
| KIR2DL3  | killer cell irCD158B2 C    | 19 NaturalKiller_Cell_Cytotoxicity |
| KIR2DL4  | killer cell irCD158D G     | 19 NaturalKiller_Cell_Cytotoxicity |
| KIR2DL5A | killer cell irCD158F KI    | 19 NaturalKiller_Cell_Cytotoxicity |
| KLRC1    | killer cell leCD159A N     | 12 NaturalKiller_Cell_Cytotoxicity |
| KLRC2    | killer cell leCD159c N     | 12 NaturalKiller_Cell_Cytotoxicity |
| KLRC3    | killer cell leNKG2-E N     | 12 NaturalKiller_Cell_Cytotoxicity |
| KLRD1    | killer cell leCD94         | 12 NaturalKiller_Cell_Cytotoxicity |
| PTPN6    | protein tyroHCP HCP        | 12 NaturalKiller_Cell_Cytotoxicity |
| PTPN11   | protein tyroBTP3 CFC       | 12 NaturalKiller_Cell_Cytotoxicity |
| ICAM1    | intercellula BB2 CD54      | 19 NaturalKiller_Cell_Cytotoxicity |
| ICAM2    | intercellula CD102         | 17 NaturalKiller_Cell_Cytotoxicity |
| ITGAL    | integrin suCD11A LF        | 16 NaturalKiller_Cell_Cytotoxicity |
| ITGB2    | integrin suCD18 LAD        | 21 NaturalKiller_Cell_Cytotoxicity |
| PTK2B    | protein tyroCADTK C/       | 8 NaturalKiller_Cell_Cytotoxicity  |
| VAV3     | vav guanin-                | 1 NaturalKiller_Cell_Cytotoxicity  |
| VAV1     | vav guanin VAV             | 19 NaturalKiller_Cell_Cytotoxicity |
| VAV2     | vav guanin VAV-2           | 9 NaturalKiller_Cell_Cytotoxicity  |
| RAC1     | Rac family MIG5 MRI        | 7 NaturalKiller_Cell_Cytotoxicity  |
| RAC2     | Rac family EN-7 Gx H       | 22 NaturalKiller_Cell_Cytotoxicity |
| RAC3     | Rac family -               | 17 NaturalKiller_Cell_Cytotoxicity |
| PAK1     | p21 (RAC1)DDMSSD           | 11 NaturalKiller_Cell_Cytotoxicity |
| MAP2K1   | mitogen-acCFC3 MAF         | 15 NaturalKiller_Cell_Cytotoxicity |
| MAP2K2   | mitogen-acCFC4 MAF         | 19 NaturalKiller_Cell_Cytotoxicity |
| MAPK1    | mitogen-acERK ERK-         | 22 NaturalKiller_Cell_Cytotoxicity |
| MAPK3    | mitogen-acERK-1 ERK        | 16 NaturalKiller_Cell_Cytotoxicity |
| TNF      | tumor necrDIF TNF-a        | 6 NaturalKiller_Cell_Cytotoxicity  |
| CSF2     | colony stimCSF GMCS        | 5 NaturalKiller_Cell_Cytotoxicity  |
| IFNG     | interferon g IFG IFI       | 12 NaturalKiller_Cell_Cytotoxicity |
| KIR2DS1  | killer cell irCD158H C     | 19 NaturalKiller_Cell_Cytotoxicity |
| KIR2DS3  | killer cell ir NKAT7       | 19 NaturalKiller_Cell_Cytotoxicity |
| KIR2DS4  | killer cell irCD158I KI    | 19 NaturalKiller_Cell_Cytotoxicity |
| KIR2DS5  | killer cell irCD158G N     | 19 NaturalKiller_Cell_Cytotoxicity |
| NCR2     | natural cytcCD336 LY!      | 6 NaturalKiller_Cell_Cytotoxicity  |
| TYROBP   | transmembDAP12 KA          | 19 NaturalKiller_Cell_Cytotoxicity |
| LCK      | LCK proto-IMD22 LSF        | 1 NaturalKiller_Cell_Cytotoxicity  |
| FCGR3A   | Fc fragmenCD16 CD10        | 1 NaturalKiller_Cell_Cytotoxicity  |
| FCGR3B   | Fc fragmenCD16 CD10        | 1 NaturalKiller_Cell_Cytotoxicity  |
| NCR1     | natural cytcCD335 LY!      | 19 NaturalKiller_Cell_Cytotoxicity |
| NCR3     | natural cytc1C7 CD337      | 6 NaturalKiller_Cell_Cytotoxicity  |
| FCER1G   | Fc fragmenFCRG             | 1 NaturalKiller_Cell_Cytotoxicity  |
| CD247    | CD247 molCD3-ZETA          | 1 NaturalKiller_Cell_Cytotoxicity  |
| ZAP70    | zeta chain cADMIO2 II      | 2 NaturalKiller_Cell_Cytotoxicity  |
| SYK      | spleen asso p72-Syk        | 9 NaturalKiller_Cell_Cytotoxicity  |
| LCP2     | lymphocyteSLP-76 SL        | 5 NaturalKiller_Cell_Cytotoxicity  |
| LAT      | linker for aIMD52 LA       | 16 NaturalKiller_Cell_Cytotoxicity |
| PLCG1    | phospholip:NCKAP3 P        | 20 NaturalKiller_Cell_Cytotoxicity |
| PLCG2    | phospholip:APLAID F        | 16 NaturalKiller_Cell_Cytotoxicity |

|        |                         |                                    |
|--------|-------------------------|------------------------------------|
| SH3BP2 | SH3 domain 3BP-2 3BP    | 4 NaturalKiller_Cell_Cytotoxicity  |
| PIK3CA | phosphatidy CLAPO CL    | 3 NaturalKiller_Cell_Cytotoxicity  |
| PIK3CB | phosphatidy P110BETA    | 3 NaturalKiller_Cell_Cytotoxicity  |
| PIK3CD | phosphatidy APDS IMD    | 1 NaturalKiller_Cell_Cytotoxicity  |
| PIK3CG | phosphatidy PI3CG PI3I  | 7 NaturalKiller_Cell_Cytotoxicity  |
| PIK3R5 | phosphoino F7300381     | 17 NaturalKiller_Cell_Cytotoxicity |
| PIK3R1 | phosphoino AGM7 GR      | 5 NaturalKiller_Cell_Cytotoxicity  |
| PIK3R2 | phosphoino MPPH MPI     | 19 NaturalKiller_Cell_Cytotoxicity |
| PIK3R3 | phosphoino p55 p55-G/   | 1 NaturalKiller_Cell_Cytotoxicity  |
| FYN    | FYN proto-SLK SYN f     | 6 NaturalKiller_Cell_Cytotoxicity  |
| SHC2   | SHC adapt SCK SHCE      | 19 NaturalKiller_Cell_Cytotoxicity |
| SHC4   | SHC adapt RaLP SHC      | 15 NaturalKiller_Cell_Cytotoxicity |
| SHC3   | SHC adapt N-Shc NSH     | 9 NaturalKiller_Cell_Cytotoxicity  |
| SHC1   | SHC adapt SHC SHCA      | 1 NaturalKiller_Cell_Cytotoxicity  |
| GRB2   | growth fact ASH EGFR    | 17 NaturalKiller_Cell_Cytotoxicity |
| SOS1   | SOS Ras/R.GF1 GGF1      | 2 NaturalKiller_Cell_Cytotoxicity  |
| SOS2   | SOS Ras/R.NS9 SOS-2     | 14 NaturalKiller_Cell_Cytotoxicity |
| HRAS   | HRas proto-C-BAS/HA     | 11 NaturalKiller_Cell_Cytotoxicity |
| KRAS   | KRAS prot'C-K-RAS C     | 12 NaturalKiller_Cell_Cytotoxicity |
| NRAS   | NRAS prot ALPS4 CM      | 1 NaturalKiller_Cell_Cytotoxicity  |
| ARAF   | A-Raf prot A-RAF AR X   | NaturalKiller_Cell_Cytotoxicity    |
| BRAF   | B-Raf prot B-RAF1 B-    | 7 NaturalKiller_Cell_Cytotoxicity  |
| RAF1   | Raf-1 proto CMD1NN C    | 3 NaturalKiller_Cell_Cytotoxicity  |
| MICA   | MHC class MIC-A PEI     | 6 NaturalKiller_Cell_Cytotoxicity  |
| MICB   | MHC class PERB11.2      | 6 NaturalKiller_Cell_Cytotoxicity  |
| ULBP3  | UL16 bindi N2DL-3 NF    | 6 NaturalKiller_Cell_Cytotoxicity  |
| ULBP2  | UL16 bindi ALCAN-al     | 6 NaturalKiller_Cell_Cytotoxicity  |
| ULBP1  | UL16 bindi N2DL-1 NF    | 6 NaturalKiller_Cell_Cytotoxicity  |
| KLRK1  | killer cell  eCD314 D12 | 12 NaturalKiller_Cell_Cytotoxicity |
| HCST   | hematopoie DAP10 KA     | 19 NaturalKiller_Cell_Cytotoxicity |
| CD48   | CD48 mole BCM1 BLA      | 1 NaturalKiller_Cell_Cytotoxicity  |
| CD244  | CD244 mol 2B4 NAIL      | 1 NaturalKiller_Cell_Cytotoxicity  |
| PPP3CA | protein pho ACCIID C/   | 4 NaturalKiller_Cell_Cytotoxicity  |
| PPP3CB | protein pho CALNA2 C    | 10 NaturalKiller_Cell_Cytotoxicity |
| PPP3CC | protein pho CALNA3 C    | 8 NaturalKiller_Cell_Cytotoxicity  |
| CHP1   | calcineurin CHP SLC9.   | 15 NaturalKiller_Cell_Cytotoxicity |
| PPP3R1 | protein pho CALNB1 C    | 2 NaturalKiller_Cell_Cytotoxicity  |
| PPP3R2 | protein pho PPP3RL      | 9 NaturalKiller_Cell_Cytotoxicity  |
| CHP2   | calcineurin -           | 16 NaturalKiller_Cell_Cytotoxicity |
| NFAT5  | nuclear fact NF-AT5 NI  | 16 NaturalKiller_Cell_Cytotoxicity |
| NFATC1 | nuclear fact NF-ATC N   | 18 NaturalKiller_Cell_Cytotoxicity |
| NFATC2 | nuclear fact NFAT1 NF   | 20 NaturalKiller_Cell_Cytotoxicity |
| NFATC3 | nuclear fact NF-AT4c N  | 16 NaturalKiller_Cell_Cytotoxicity |
| NFATC4 | nuclear fact NF-AT3 NI  | 14 NaturalKiller_Cell_Cytotoxicity |
| PRKCA  | protein kin AAG6 PKC    | 17 NaturalKiller_Cell_Cytotoxicity |
| PRKCB  | protein kin PKC-beta P  | 16 NaturalKiller_Cell_Cytotoxicity |
| PRKCG  | protein kin PKC-gamm    | 19 NaturalKiller_Cell_Cytotoxicity |
| SH2D1B | SH2 domain EAT2         | 1 NaturalKiller_Cell_Cytotoxicity  |
| SH2D1A | SH2 domain DSHP EBV X   | NaturalKiller_Cell_Cytotoxicity    |
| IFNGR1 | interferon g CD119 IFN  | 6 NaturalKiller_Cell_Cytotoxicity  |
| IFNGR2 | interferon g AF-1 IFGR  | 21 NaturalKiller_Cell_Cytotoxicity |
| IFNA1  | interferon a IFL IFN IF | 9 NaturalKiller_Cell_Cytotoxicity  |
| IFNA2  | interferon a IFN-alpha- | 9 NaturalKiller_Cell_Cytotoxicity  |
| IFNA4  | interferon a IFN-alpha4 | 9 NaturalKiller_Cell_Cytotoxicity  |
| IFNA5  | interferon a IFN-alpha- | 9 NaturalKiller_Cell_Cytotoxicity  |
| IFNA6  | interferon a IFN-alphaK | 9 NaturalKiller_Cell_Cytotoxicity  |
| IFNA7  | interferon a IFN-alphaJ | 9 NaturalKiller_Cell_Cytotoxicity  |
| IFNA8  | interferon a IFN-alphaE | 9 NaturalKiller_Cell_Cytotoxicity  |
| IFNA10 | interferon a IFN-alphaC | 9 NaturalKiller_Cell_Cytotoxicity  |
| IFNA13 | interferon a -          | 9 NaturalKiller_Cell_Cytotoxicity  |

|          |                         |                                    |
|----------|-------------------------|------------------------------------|
| IFNA14   | interferon aIFN-alphaF  | 9 NaturalKiller_Cell_Cytotoxicity  |
| IFNA16   | interferon aIFN-alpha-  | 9 NaturalKiller_Cell_Cytotoxicity  |
| IFNA17   | interferon aIFN-alphaI  | 9 NaturalKiller_Cell_Cytotoxicity  |
| IFNA21   | interferon aIFN-alphaI  | 9 NaturalKiller_Cell_Cytotoxicity  |
| IFNB1    | interferon bIFB IFF IFT | 9 NaturalKiller_Cell_Cytotoxicity  |
| IFNAR1   | interferon aAVP IFN-a   | 21 NaturalKiller_Cell_Cytotoxicity |
| IFNAR2   | interferon aIFN-R IFN-  | 21 NaturalKiller_Cell_Cytotoxicity |
| TNFSF10  | TNF superfAPO2L Ap      | 3 NaturalKiller_Cell_Cytotoxicity  |
| TNFRSF10 | TNF receptCD264 DC      | 8 NaturalKiller_Cell_Cytotoxicity  |
| TNFRSF10 | TNF receptCD263 DC      | 8 NaturalKiller_Cell_Cytotoxicity  |
| TNFRSF10 | TNF receptCD262 DR      | 8 NaturalKiller_Cell_Cytotoxicity  |
| TNFRSF10 | TNF receptAPO2 CD2      | 8 NaturalKiller_Cell_Cytotoxicity  |
| FASLG    | Fas ligand ALPS1B A     | 1 NaturalKiller_Cell_Cytotoxicity  |
| FAS      | Fas cell sur ALPS1A A   | 10 NaturalKiller_Cell_Cytotoxicity |
| GZMB     | granzyme EC11 CCPI C    | 14 NaturalKiller_Cell_Cytotoxicity |
| PRF1     | perforin 1 HPLH2 P1     | 10 NaturalKiller_Cell_Cytotoxicity |
| CASP3    | caspase 3 CPP32 CPF     | 4 NaturalKiller_Cell_Cytotoxicity  |
| BID      | BH3 interaεFP497        | 22 NaturalKiller_Cell_Cytotoxicity |
| CD3D     | CD3d moleCD3-DELI       | 11 TCRsignalingPathway             |
| CD3E     | CD3e moleIMD18 T3E      | 11 TCRsignalingPathway             |
| CD3G     | CD3g moleCD3-GAM        | 11 TCRsignalingPathway             |
| CD247    | CD247 molCD3-ZETA       | 1 TCRsignalingPathway              |
| CD4      | CD4 molec CD4mut        | 12 TCRsignalingPathway             |
| CD8A     | CD8a moleCD8 Leu2 f     | 2 TCRsignalingPathway              |
| CD8B     | CD8b moleCD8B1 LE       | 2 TCRsignalingPathway              |
| PTPRC    | protein tyroB220 CD45   | 1 TCRsignalingPathway              |
| LCK      | LCK proto-IMD22 LSF     | 1 TCRsignalingPathway              |
| FYN      | FYN proto-SLK SYN f     | 6 TCRsignalingPathway              |
| ZAP70    | zeta chain cADMIO2 II   | 2 TCRsignalingPathway              |
| LCP2     | lymphocyteSLP-76 SL     | 5 TCRsignalingPathway              |
| LAT      | linker for aIMD52 LA    | 16 TCRsignalingPathway             |
| ITK      | IL2 inducibEMT LPFS     | 5 TCRsignalingPathway              |
| TEC      | tec protein tPSCTK4     | 4 TCRsignalingPathway              |
| NCK1     | NCK adaptNCK NCKε       | 3 TCRsignalingPathway              |
| NCK2     | NCK adaptGRB4 NCK       | 2 TCRsignalingPathway              |
| VAV3     | vav guaninε-            | 1 TCRsignalingPathway              |
| VAV1     | vav guaninεVAV          | 19 TCRsignalingPathway             |
| VAV2     | vav guaninεVAV-2        | 9 TCRsignalingPathway              |
| GRAP2    | GRB2 relatGADS GRε      | 22 TCRsignalingPathway             |
| GRB2     | growth factASH EGFR     | 17 TCRsignalingPathway             |
| PAK1     | p21 (RAC1IDDMSSD        | 11 TCRsignalingPathway             |
| PAK2     | p21 (RAC1PAK65 PA       | 3 TCRsignalingPathway              |
| PAK3     | p21 (RAC1ARA MRX X      | TCRsignalingPathway                |
| PAK4     | p21 (RAC1 -             | 19 TCRsignalingPathway             |
| PAK6     | p21 (RAC1 PAK5          | 15 TCRsignalingPathway             |
| PAK5     | p21 (RAC1 PAK7          | 20 TCRsignalingPathway             |
| RHOA     | ras homoloεARH12 AR     | 3 TCRsignalingPathway              |
| CDC42    | cell divisioiCDC42Hs C  | 1 TCRsignalingPathway              |
| PPP3CA   | protein pho ACCIID Cε   | 4 TCRsignalingPathway              |
| PPP3CB   | protein pho CALNA2 C    | 10 TCRsignalingPathway             |
| PPP3CC   | protein pho CALNA3 C    | 8 TCRsignalingPathway              |
| CHP1     | calcineurin CHP SLC9.   | 15 TCRsignalingPathway             |
| PPP3R1   | protein pho CALNB1 C    | 2 TCRsignalingPathway              |
| PPP3R2   | protein pho PPP3RL      | 9 TCRsignalingPathway              |
| CHP2     | calcineurin -           | 16 TCRsignalingPathway             |
| NFAT5    | nuclear factNF-AT5 NI   | 16 TCRsignalingPathway             |
| NFATC1   | nuclear factNF-ATC N    | 18 TCRsignalingPathway             |
| NFATC2   | nuclear factNFAT1 NF    | 20 TCRsignalingPathway             |
| NFATC3   | nuclear factNF-AT4c N   | 16 TCRsignalingPathway             |
| NFATC4   | nuclear factNF-AT3 NI   | 14 TCRsignalingPathway             |

|         |                         |                        |
|---------|-------------------------|------------------------|
| SOS1    | SOS Ras/R:GF1 GGF1      | 2 TCRsignalingPathway  |
| SOS2    | SOS Ras/R:NS9 SOS-2     | 14 TCRsignalingPathway |
| HRAS    | HRas proto C-BAS/HA     | 11 TCRsignalingPathway |
| KRAS    | KRAS prot'C-K-RAS C     | 12 TCRsignalingPathway |
| NRAS    | NRAS prot:ALPS4 CM      | 1 TCRsignalingPathway  |
| FOS     | Fos proto-o:AP-1 C-FO   | 14 TCRsignalingPathway |
| JUN     | Jun proto-o:AP-1 AP1 c  | 1 TCRsignalingPathway  |
| CARD11  | caspase rec:BENTA BI    | 7 TCRsignalingPathway  |
| BCL10   | BCL10 imr:CARMEN        | 1 TCRsignalingPathway  |
| MALT1   | MALT1 pa:IMD12 ML       | 18 TCRsignalingPathway |
| CHUK    | component IKKKA IK      | 10 TCRsignalingPathway |
| IKBKB   | inhibitor of IKK-beta I | 8 TCRsignalingPathway  |
| IKBKG   | inhibitor of AMCBX1 X   | TCRsignalingPathway    |
| NFKB1   | nuclear fact:CVID12 E   | 4 TCRsignalingPathway  |
| RELA    | RELA prot:CMCU NF       | 11 TCRsignalingPathway |
| NFKBIA  | NFKB inhil:EDAID2 IK    | 14 TCRsignalingPathway |
| NFKBIB  | NFKB inhil:KBB TRIF     | 19 TCRsignalingPathway |
| NFKBIE  | NFKB inhil:KBE          | 6 TCRsignalingPathway  |
| CD28    | CD28 mole Tp44          | 2 TCRsignalingPathway  |
| ICOS    | inducible TAILIM CD:    | 2 TCRsignalingPathway  |
| CD40LG  | CD40 ligan:CD154 CD-X   | TCRsignalingPathway    |
| PIK3R5  | phosphoino:F7300381 :   | 17 TCRsignalingPathway |
| PIK3R1  | phosphoino:AGM7 GR      | 5 TCRsignalingPathway  |
| PIK3R2  | phosphoino:MPPH MPI     | 19 TCRsignalingPathway |
| PIK3R3  | phosphoinop55 p55-G/    | 1 TCRsignalingPathway  |
| PIK3CA  | phosphatid:CLAPO CL     | 3 TCRsignalingPathway  |
| PIK3CB  | phosphatid:P110BETA     | 3 TCRsignalingPathway  |
| PIK3CD  | phosphatid:APDS IMD     | 1 TCRsignalingPathway  |
| PIK3CG  | phosphatid:PI3CG PI3I   | 7 TCRsignalingPathway  |
| AKT3    | AKT serine:MPPH MPI     | 1 TCRsignalingPathway  |
| AKT1    | AKT serine:AKT CWS      | 14 TCRsignalingPathway |
| AKT2    | AKT serine:HIHGHH P     | 19 TCRsignalingPathway |
| MAP3K8  | mitogen-ac:AURA2 CC     | 10 TCRsignalingPathway |
| MAP3K14 | mitogen-ac:FTDCR1B      | 17 TCRsignalingPathway |
| PDCD1   | programme:CD279 PD-     | 2 TCRsignalingPathway  |
| CTLA4   | cytotoxic T:ALPS5 CD    | 2 TCRsignalingPathway  |
| PTPN6   | protein tyro:HCP HCP:   | 12 TCRsignalingPathway |
| CBLC    | Cbl proto-o:CBL-3 CBI   | 19 TCRsignalingPathway |
| CBL     | Cbl proto-o:C-CBL CB:   | 11 TCRsignalingPathway |
| CBLB    | Cbl proto-o:Cbl-b Nbla  | 3 TCRsignalingPathway  |
| IL2     | interleukin IL-2 TCGF   | 4 TCRsignalingPathway  |
| IL4     | interleukin BCGF-1 BC   | 5 TCRsignalingPathway  |
| IL5     | interleukin EDF IL-5 T  | 5 TCRsignalingPathway  |
| IL10    | interleukin CSIF GVH    | 1 TCRsignalingPathway  |
| IFNG    | interferon g:IFG IFI    | 12 TCRsignalingPathway |
| CSF2    | colony stim:CSF GMCS    | 5 TCRsignalingPathway  |
| TNF     | tumor necr:DIF TNF-a    | 6 TCRsignalingPathway  |
| CDK4    | cyclin depe:CMM3 PSF    | 12 TCRsignalingPathway |
| RASGRP1 | RAS guany:CALDAG-+      | 15 TCRsignalingPathway |
| PDK1    | pyruvate de-            | 2 TCRsignalingPathway  |
| PLCG1   | phospholip:NCKAP3 P     | 20 TCRsignalingPathway |
| PRKCQ   | protein kin:PRKCT nP    | 10 TCRsignalingPathway |
| TRAC    | T cell recep:IMD7 TCR   | 14 TCRsignalingPathway |
| TRAJ1   | T cell recep-           | 14 TCRsignalingPathway |
| TRAJ2   | T cell recep-           | 14 TCRsignalingPathway |
| TRAJ3   | T cell recep-           | 14 TCRsignalingPathway |
| TRAJ4   | T cell recep-           | 14 TCRsignalingPathway |
| TRAJ5   | T cell recep-           | 14 TCRsignalingPathway |
| TRAJ6   | T cell recep-           | 14 TCRsignalingPathway |
| TRAJ7   | T cell recep-           | 14 TCRsignalingPathway |





|          |                       |    |                     |
|----------|-----------------------|----|---------------------|
| TRAV8-3  | T cell recepTCRAV1S   | 14 | TCRsignalingPathway |
| TRAV8-4  | T cell recepTCRAV1S   | 14 | TCRsignalingPathway |
| TRAV8-6  | T cell recepTCRAV1S   | 14 | TCRsignalingPathway |
| TRAV8-7  | T cell recepTCRAV8S   | 14 | TCRsignalingPathway |
| TRAV9-1  | T cell recepTCRAV9S   | 14 | TCRsignalingPathway |
| TRAV9-2  | T cell recepTCRAV22   | 14 | TCRsignalingPathway |
| TRAV10   | T cell recepTCRAV10   | 14 | TCRsignalingPathway |
| TRAV12-1 | T cell recepTCRAV12   | 14 | TCRsignalingPathway |
| TRAV12-2 | T cell recepTCRAV12   | 14 | TCRsignalingPathway |
| TRAV12-3 | T cell recepTCRAV12   | 14 | TCRsignalingPathway |
| TRAV13-1 | T cell recepTCRAV13   | 14 | TCRsignalingPathway |
| TRAV13-2 | T cell recepTCRAV13   | 14 | TCRsignalingPathway |
| TRAV14D  | T cell recepTCRAV6S   | 14 | TCRsignalingPathway |
| TRAV16   | T cell recepTCRAV16   | 14 | TCRsignalingPathway |
| TRAV17   | T cell recepTCRAV17   | 14 | TCRsignalingPathway |
| TRAV18   | T cell recepTCRAV18   | 14 | TCRsignalingPathway |
| TRAV19   | T cell recepTCRAV12   | 14 | TCRsignalingPathway |
| TRAV20   | T cell recepTCRAV20   | 14 | TCRsignalingPathway |
| TRAV21   | T cell recepTCRAV21   | 14 | TCRsignalingPathway |
| TRAV22   | T cell recepTCRAV13   | 14 | TCRsignalingPathway |
| TRAV23D  | T cell recepTCRAV17   | 14 | TCRsignalingPathway |
| TRAV24   | T cell recepTCRAV18   | 14 | TCRsignalingPathway |
| TRAV25   | T cell recepTCRAV25   | 14 | TCRsignalingPathway |
| TRAV26-1 | T cell recepTCRAV26   | 14 | TCRsignalingPathway |
| TRAV26-2 | T cell recepTCRAV26   | 14 | TCRsignalingPathway |
| TRAV27   | T cell recepTCRAV10   | 14 | TCRsignalingPathway |
| TRAV29D  | T cell recepTCRA TCR  | 14 | TCRsignalingPathway |
| TRAV30   | T cell recepTCRAV29   | 14 | TCRsignalingPathway |
| TRAV34   | T cell recepTCRAV26   | 14 | TCRsignalingPathway |
| TRAV35   | T cell recepTCRAV25   | 14 | TCRsignalingPathway |
| TRAV36D  | T cell recepTCRAV28   | 14 | TCRsignalingPathway |
| TRAV38-1 | T cell recepTCRAV14   | 14 | TCRsignalingPathway |
| TRAV38-2 | T cell recepTCRAV14   | 14 | TCRsignalingPathway |
| TRAV39   | T cell recepTCRAV27   | 14 | TCRsignalingPathway |
| TRAV40   | T cell recepTCRAV31   | 14 | TCRsignalingPathway |
| TRAV41   | T cell recepTCRAV19   | 14 | TCRsignalingPathway |
| TRBC1    | T cell recepBV05S1J2. | 7  | TCRsignalingPathway |
| TRBC2    | T cell recepTCRBC2    | 7  | TCRsignalingPathway |
| TRBD1    | T cell recepTCRBD1    | 7  | TCRsignalingPathway |
| TRBD2    | T cell recepTCRBD2    | 7  | TCRsignalingPathway |
| TRBJ1-1  | T cell recepTCRBJ1S1  | 7  | TCRsignalingPathway |
| TRBJ1-2  | T cell recepTCRBJ1S2  | 7  | TCRsignalingPathway |
| TRBJ1-3  | T cell recepTCRBJ1S3  | 7  | TCRsignalingPathway |
| TRBJ1-4  | T cell recepTCRBJ1S4  | 7  | TCRsignalingPathway |
| TRBJ1-5  | T cell recepTCRBJ1S5  | 7  | TCRsignalingPathway |
| TRBJ1-6  | T cell recepTCRBJ1S6  | 7  | TCRsignalingPathway |
| TRBJ2-1  | T cell recepTCRBJ2S1  | 7  | TCRsignalingPathway |
| TRBJ2-2  | T cell recepTCRBJ2S2  | 7  | TCRsignalingPathway |
| TRBJ2-3  | T cell recepTCRBJ2S3  | 7  | TCRsignalingPathway |
| TRBJ2-4  | T cell recepTCRBJ2S4  | 7  | TCRsignalingPathway |
| TRBJ2-5  | T cell recepTCRBJ2S5  | 7  | TCRsignalingPathway |
| TRBJ2-6  | T cell recepTCRBJ2S6  | 7  | TCRsignalingPathway |
| TRBJ2-7  | T cell recepTCRBJ2S7  | 7  | TCRsignalingPathway |
| TRBV2    | T cell recepTCRBV22   | 7  | TCRsignalingPathway |
| TRBV3-1  | T cell recepTCRBV3S   | 7  | TCRsignalingPathway |
| TRBV4-1  | T cell recepBV07S1J2. | 7  | TCRsignalingPathway |
| TRBV4-2  | T cell recepTCRBV4S   | 7  | TCRsignalingPathway |
| TRBV4-3  | T cell recepTCRBV4S   | 7  | TCRsignalingPathway |
| TRBV5-1  | T cell recepTCRBV5S   | 7  | TCRsignalingPathway |
| TRBV5-4  | T cell recepTCRBV5S   | 7  | TCRsignalingPathway |

|          |              |          |    |                     |
|----------|--------------|----------|----|---------------------|
| TRBV5-5  | T cell recep | TCRBV5S  | 7  | TCRsignalingPathway |
| TRBV5-6  | T cell recep | TCRBV5S  | 7  | TCRsignalingPathway |
| TRBV5-7  | T cell recep | TCRBV5S  | 7  | TCRsignalingPathway |
| TRBV5-8  | T cell recep | TCRBV5S  | 7  | TCRsignalingPathway |
| TRBV6-1  | T cell recep | TCRBV13S | 7  | TCRsignalingPathway |
| TRBV6-2  | T cell recep | TCRBV13S | 7  | TCRsignalingPathway |
| TRBV6-3  | T cell recep | TCRBV13S | 7  | TCRsignalingPathway |
| TRBV6-4  | T cell recep | TCRBV13S | 7  | TCRsignalingPathway |
| TRBV6-5  | T cell recep | TCRBV13S | 7  | TCRsignalingPathway |
| TRBV6-6  | T cell recep | TCRBV13S | 7  | TCRsignalingPathway |
| TRBV6-7  | T cell recep | TCRBV13S | 7  | TCRsignalingPathway |
| TRBV6-8  | T cell recep | TCRBV13S | 7  | TCRsignalingPathway |
| TRBV6-9  | T cell recep | TCRBV13S | 7  | TCRsignalingPathway |
| TRBV7-2  | T cell recep | TCRBV6S  | 7  | TCRsignalingPathway |
| TRBV7-3  | T cell recep | TCRBV6S  | 7  | TCRsignalingPathway |
| TRBV7-4  | T cell recep | TCRBV6S  | 7  | TCRsignalingPathway |
| TRBV7-6  | T cell recep | TCRBV6S  | 7  | TCRsignalingPathway |
| TRBV7-7  | T cell recep | TCRBV6S  | 7  | TCRsignalingPathway |
| TRBV7-8  | T cell recep | TCRBV6S  | 7  | TCRsignalingPathway |
| TRBV7-9  | T cell recep | TCRBV6S  | 7  | TCRsignalingPathway |
| TRBV9    | T cell recep | TCRBV1S  | 7  | TCRsignalingPathway |
| TRBV10-1 | T cell recep | TCRBV10S | 7  | TCRsignalingPathway |
| TRBV10-2 | T cell recep | TCRBV10S | 7  | TCRsignalingPathway |
| TRBV10-3 | T cell recep | TCRBV10S | 7  | TCRsignalingPathway |
| TRBV11-1 | T cell recep | TCRBV11S | 7  | TCRsignalingPathway |
| TRBV11-2 | T cell recep | TCRBV11S | 7  | TCRsignalingPathway |
| TRBV11-3 | T cell recep | TCRBV11S | 7  | TCRsignalingPathway |
| TRBV12-3 | T cell recep | TCRBV12S | 7  | TCRsignalingPathway |
| TRBV12-4 | T cell recep | TCRBV12S | 7  | TCRsignalingPathway |
| TRBV12-5 | T cell recep | TCRBV12S | 7  | TCRsignalingPathway |
| TRBV13   | T cell recep | TCRBV13S | 7  | TCRsignalingPathway |
| TRBV14   | T cell recep | TCRBV14S | 7  | TCRsignalingPathway |
| TRBV15   | T cell recep | TCRBV15S | 7  | TCRsignalingPathway |
| TRBV16   | T cell recep | BV25S1J1 | 7  | TCRsignalingPathway |
| TRBV17   | T cell recep | TCRBV17S | 7  | TCRsignalingPathway |
| TRBV18   | T cell recep | TCRBV18S | 7  | TCRsignalingPathway |
| TRBV19   | T cell recep | TCRBV17S | 7  | TCRsignalingPathway |
| TRBV20-1 | T cell recep | TCRBV20S | 7  | TCRsignalingPathway |
| TRBV24-1 | T cell recep | TCRBV15S | 7  | TCRsignalingPathway |
| TRBV25-1 | T cell recep | TCRBV11S | 7  | TCRsignalingPathway |
| TRBV27   | T cell recep | TCRBV14S | 7  | TCRsignalingPathway |
| TRBV28   | T cell recep | TCRBV28S | 7  | TCRsignalingPathway |
| TRBV29-1 | T cell recep | TCRBV29S | 7  | TCRsignalingPathway |
| TRBV30   | T cell recep | TCRBV20S | 7  | TCRsignalingPathway |
| TRDC     | T cell recep | TCRD     | 14 | TCRsignalingPathway |
| TRDD1    | T cell recep | -        | 14 | TCRsignalingPathway |
| TRDD2    | T cell recep | -        | 14 | TCRsignalingPathway |
| TRDD3    | T cell recep | TCRD     | 14 | TCRsignalingPathway |
| TRDJ1    | T cell recep | TCRD     | 14 | TCRsignalingPathway |
| TRDJ2    | T cell recep | -        | 14 | TCRsignalingPathway |
| TRDJ3    | T cell recep | -        | 14 | TCRsignalingPathway |
| TRDJ4    | T cell recep | -        | 14 | TCRsignalingPathway |
| TRDV1    | T cell recep | hDV101S1 | 14 | TCRsignalingPathway |
| TRDV2    | T cell recep | hDV102S1 | 14 | TCRsignalingPathway |
| TRDV3    | T cell recep | hDV103S1 | 14 | TCRsignalingPathway |
| TRGV9    | T cell recep | TCRGV9 V | 7  | TCRsignalingPathway |
| TRGV8    | T cell recep | TCRGV8 V | 7  | TCRsignalingPathway |
| TRGV5    | T cell recep | TCRGV5 V | 7  | TCRsignalingPathway |
| TRGV4    | T cell recep | TCRGV4 V | 7  | TCRsignalingPathway |
| TRGV3    | T cell recep | TCRGV3 V | 7  | TCRsignalingPathway |

|          |                       |                                |
|----------|-----------------------|--------------------------------|
| TRGV2    | T cell recepTCRGV2 V  | 7 TCRsignalingPathway          |
| TRGJP2   | T cell recepJP2 TCRGJ | 7 TCRsignalingPathway          |
| TRGJP1   | T cell recepJP1 TCRGJ | 7 TCRsignalingPathway          |
| TRGJP    | T cell recepJP TCRGJF | 7 TCRsignalingPathway          |
| TRGJ2    | T cell recepJ2 TCRGJ2 | 7 TCRsignalingPathway          |
| TRGJ1    | T cell recepJ1 TCRGJ1 | 7 TCRsignalingPathway          |
| TRGC2    | T cell recepTCRGC2 T  | 7 TCRsignalingPathway          |
| TRGC1    | T cell recepC1 TCRG T | 7 TCRsignalingPathway          |
| TRAV6    | T cell recepTCRAV5S   | 14 TCRsignalingPathway         |
| BMP1     | bone morplOI13 PCOL   | 8 TGFb_Family_Member           |
| BMP10    | bone morpl-           | 2 TGFb_Family_Member           |
| BMP15    | bone morplGDF9B OEX   | 2 TGFb_Family_Member           |
| BMP2     | bone morplBDA2 BMI    | 20 TGFb_Family_Member          |
| BMP3     | bone morpl BMP-3A     | 4 TGFb_Family_Member           |
| BMP4     | bone morplBMP2B BN    | 14 TGFb_Family_Member          |
| BMP5     | bone morpl-           | 6 TGFb_Family_Member           |
| BMP6     | bone morplVGR VGR     | 6 TGFb_Family_Member           |
| BMP7     | bone morpl OP-1       | 20 TGFb_Family_Member          |
| BMP8A    | bone morpl OP-2       | 1 TGFb_Family_Member           |
| BMP8B    | bone morpl BMP8 OP2   | 1 TGFb_Family_Member           |
| GDF1     | growth diffCERS1 CH   | 19 TGFb_Family_Member          |
| GDF10    | growth diffBIP BMP-3  | 10 TGFb_Family_Member          |
| GDF11    | growth diffBMP-11 BM  | 12 TGFb_Family_Member          |
| GDF15    | growth diffGDF-15 M   | 19 TGFb_Family_Member          |
| GDF2     | growth diffBMP-9 BM   | 10 TGFb_Family_Member          |
| GDF3     | growth diffKFS3 MCC   | 12 TGFb_Family_Member          |
| GDF5     | growth diffBDA1C BN   | 20 TGFb_Family_Member          |
| GDF6     | growth diffBMP-13 BM  | 8 TGFb_Family_Member           |
| GDF7     | growth diff BMP12     | 2 TGFb_Family_Member           |
| GDF9     | growth diff POF14     | 5 TGFb_Family_Member           |
| GDNF     | glial cell deATF ATF1 | 5 TGFb_Family_Member           |
| INHBA    | inhibin sub-          | 2 TGFb_Family_Member           |
| INHBA    | inhibin sub EDF FRP   | 7 TGFb_Family_Member           |
| INHBB    | inhibin sub-          | 2 TGFb_Family_Member           |
| INHBC    | inhibin sub HBC       | 12 TGFb_Family_Member          |
| INHBE    | inhibin sub-          | 12 TGFb_Family_Member          |
| LEFTY1   | left-right deLEFTB LE | 1 TGFb_Family_Member           |
| LEFTY2   | left-right deEBAF LEF | 1 TGFb_Family_Member           |
| NODAL    | nodal grow HTX5       | 10 TGFb_Family_Member          |
| TGFB1    | transforminCED DPD1   | 19 TGFb_Family_Member          |
| TGFB2    | transforminG-TSF LD   | 1 TGFb_Family_Member           |
| TGFB3    | transforminARVD AR    | 14 TGFb_Family_Member          |
| ACVR1B   | activin A reACTRIB A  | 12 TGFb_Family_Member_Receptor |
| ACVR1C   | activin A reACVRLK7   | 2 TGFb_Family_Member_Receptor  |
| ACVR2A   | activin A reACTRII AC | 2 TGFb_Family_Member_Receptor  |
| ACVR2B   | activin A reACTRIIB A | 3 TGFb_Family_Member_Receptor  |
| ACVRL1   | activin A reACVRLK1   | 12 TGFb_Family_Member_Receptor |
| AMHR2    | anti-Muller AMHR MI   | 12 TGFb_Family_Member_Receptor |
| BMPR1A   | bone morpl10q23del A  | 10 TGFb_Family_Member_Receptor |
| BMPR1B   | bone morplALK-6 AL    | 4 TGFb_Family_Member_Receptor  |
| BMPR2    | bone morplBMPR-II B   | 2 TGFb_Family_Member_Receptor  |
| TGFBR1   | transforminAAT5 ACV   | 9 TGFb_Family_Member_Receptor  |
| TGFBR2   | transforminAAT3 FAA   | 3 TGFb_Family_Member_Receptor  |
| TGFBR3   | transforminBGCAN be   | 1 TGFb_Family_Member_Receptor  |
| TNFRSF11 | TNF receptOCIF OPG    | 8 TNF_Family_Members           |
| TNFSF10  | TNF superfAPO2L Ap    | 3 TNF_Family_Members           |
| TNFSF11  | TNF superfCD254 OD    | 13 TNF_Family_Members          |
| TNFSF12  | TNF superfAPO3L DR    | 17 TNF_Family_Members          |
| TNFSF13  | TNF superfAPRIL CD    | 17 TNF_Family_Members          |
| TNFSF13B | TNF superfBAFF BLY    | 13 TNF_Family_Members          |

|                              |                                 |
|------------------------------|---------------------------------|
| TNFSF14 TNF superfCD258 HV   | 19 TNF_Family_Members           |
| TNFSF15 TNF superfTL1 TL1A   | 9 TNF_Family_Members            |
| TNFSF18 TNF superfAITRL GIT  | 1 TNF_Family_Members            |
| TNFSF4 TNF superfCD134L CI   | 1 TNF_Family_Members            |
| TNFSF8 TNF superfCD153 CD    | 9 TNF_Family_Members            |
| TNFSF9 TNF superf4-1BB-L C   | 19 TNF_Family_Members           |
| TNFRSF10TNF receptCD262 DR   | 8 TNF_Family_Members_Receptors  |
| TNFRSF10TNF receptCD263 DC   | 8 TNF_Family_Members_Receptors  |
| TNFRSF10TNF receptCD264 DC   | 8 TNF_Family_Members_Receptors  |
| TNFRSF11TNF receptCD265 FEC  | 18 TNF_Family_Members_Receptors |
| TNFRSF12TNF receptCD266 FN   | 16 TNF_Family_Members_Receptors |
| TNFRSF13TNF receptCD267 CV   | 17 TNF_Family_Members_Receptors |
| TNFRSF13TNF receptBAFF-R B   | 22 TNF_Family_Members_Receptors |
| TNFRSF14TNF receptATAR CD2   | 1 TNF_Family_Members_Receptors  |
| TNFRSF17TNF receptBCM BCM    | 16 TNF_Family_Members_Receptors |
| TNFRSF18TNF receptAITR CD3   | 1 TNF_Family_Members_Receptors  |
| TNFRSF19TNF receptTAJ TAJ-al | 13 TNF_Family_Members_Receptors |
| TNFRSF1^TNF receptCD120a FP  | 12 TNF_Family_Members_Receptors |
| TNFRSF1ETNF receptCD120b TE  | 1 TNF_Family_Members_Receptors  |
| TNFRSF21TNF receptBM-018 CI  | 6 TNF_Family_Members_Receptors  |
| TNFRSF25TNF receptAPO-3 DD   | 1 TNF_Family_Members_Receptors  |
| TNFRSF4 TNF receptACT35 CD   | 1 TNF_Family_Members_Receptors  |
| TNFRSF6ETNF receptDCR3 DJ5   | 20 TNF_Family_Members_Receptors |
| TNFRSF8 TNF receptCD30 D1S   | 1 TNF_Family_Members_Receptors  |
| TNFRSF9 TNF recept4-1BB CD1  | 1 TNF_Family_Members_Receptors  |

## Supplementary 3 Co-expressed mRNA

| symbol     | correlation | pvalue    | ENTREZID |
|------------|-------------|-----------|----------|
| NOX4       | 1           | 0         | 50507    |
| VCAN       | 0.884007    | 8.89E-142 | 1462     |
| INHBA      | 0.883179    | 3.65E-141 | 3624     |
| COL8A1     | 0.881659    | 4.75E-140 | 1295     |
| COL10A1    | 0.880247    | 4.99E-139 | 1300     |
| THBS2      | 0.879597    | 1.46E-138 | 7058     |
| PRRX1      | 0.876591    | 1.92E-136 | 5396     |
| KCND2      | 0.871782    | 3.64E-133 | 3751     |
| CTHRC1     | 0.861228    | 2.05E-126 | 115908   |
| ANTXR1     | 0.857947    | 1.99E-124 | 84168    |
| SULF1      | 0.855768    | 3.89E-123 | 23213    |
| ST6GALNAC5 | 0.850349    | 5.16E-120 | 81849    |
| RAB31      | 0.845575    | 2.30E-117 | 11031    |
| POSTN      | 0.84305     | 5.33E-116 | 10631    |
| SPARC      | 0.841459    | 3.76E-115 | 6678     |
| FAP        | 0.840486    | 1.23E-114 | 2191     |
| ASPEN      | 0.835146    | 7.07E-112 | 54829    |
| LUM        | 0.834908    | 9.33E-112 | 4060     |
| COL5A2     | 0.831806    | 3.36E-110 | 1290     |
| SPOCK1     | 0.831141    | 7.17E-110 | 6695     |
| NTM        | 0.826443    | 1.39E-107 | 50863    |
| SFRP4      | 0.825098    | 6.09E-107 | 6424     |
| COL11A1    | 0.822712    | 8.13E-106 | 1301     |
| LOX        | 0.816923    | 3.74E-103 | 4015     |
| WISP1      | 0.814078    | 7.02E-102 | NA       |
| PPAPDC1A   | 0.81338     | 1.43E-101 | NA       |
| BGN        | 0.812652    | 3.00E-101 | 633      |
| COL8A2     | 0.801114    | 2.43E-96  | 1296     |
| AEBP1      | 0.800257    | 5.47E-96  | 165      |
| FBN1       | 0.799936    | 7.39E-96  | 2200     |
| TENM4      | 0.799576    | 1.04E-95  | 26011    |
| ECM2       | 0.794142    | 1.58E-93  | 1842     |
| ITGA11     | 0.792822    | 5.23E-93  | 22801    |
| COL1A2     | 0.791353    | 1.96E-92  | 1278     |
| OLFML2B    | 0.79039     | 4.65E-92  | 25903    |
| COL3A1     | 0.782437    | 4.82E-89  | 1281     |
| CDH11      | 0.781853    | 7.94E-89  | 1009     |
| ADAMTS12   | 0.779808    | 4.49E-88  | 81792    |
| LRRC15     | 0.779308    | 6.84E-88  | 131578   |
| OLR1       | 0.77717     | 4.09E-87  | 4973     |
| PLXDC2     | 0.774929    | 2.61E-86  | 84898    |
| FAM26E     | 0.773329    | 9.65E-86  | NA       |
| ISM1       | 0.769543    | 2.05E-84  | 140862   |
| BICC1      | 0.768868    | 3.51E-84  | 80114    |
| ADAM12     | 0.76848     | 4.79E-84  | 8038     |
| P4HA3      | 0.765055    | 7.12E-83  | 283208   |
| FGF1       | 0.763607    | 2.20E-82  | 2246     |
| NALCN      | 0.763571    | 2.26E-82  | 259232   |
| CDH2       | 0.762114    | 6.98E-82  | 1000     |
| KCNE4      | 0.761923    | 8.09E-82  | 23704    |
| COL1A1     | 0.761643    | 1.00E-81  | 1277     |
| COL5A1     | 0.758711    | 9.39E-81  | 1289     |
| CMTM3      | 0.758597    | 1.02E-80  | 123920   |
| FNDC1      | 0.757832    | 1.83E-80  | 84624    |
| COL12A1    | 0.755608    | 9.69E-80  | 1303     |
| DOK5       | 0.75509     | 1.43E-79  | 55816    |
| GPR176     | 0.754651    | 1.98E-79  | 11245    |
| TGFB3      | 0.754148    | 2.87E-79  | 7043     |

|            |          |             |        |
|------------|----------|-------------|--------|
| FSTL1      | 0.753652 | 4.14E-79    | 11167  |
| PDGFRB     | 0.75363  | 4.21E-79    | 5159   |
| PDGFC      | 0.749954 | 6.22E-78    | 56034  |
| COL6A3     | 0.749878 | 6.58E-78    | 1293   |
| HTRA3      | 0.749552 | 8.33E-78    | 94031  |
| CHSY3      | 0.748085 | 2.40E-77    | 337876 |
| FAM19A5    | 0.745052 | 2.10E-76 NA |        |
| MXRA8      | 0.744459 | 3.20E-76    | 54587  |
| MXRA5      | 0.744456 | 3.21E-76    | 25878  |
| GPC6       | 0.742341 | 1.42E-75    | 10082  |
| ITGBL1     | 0.740812 | 4.14E-75    | 9358   |
| BCAT1      | 0.740239 | 6.16E-75    | 586    |
| DIO2       | 0.739875 | 7.93E-75    | 1734   |
| TNFAIP6    | 0.739812 | 8.28E-75    | 7130   |
| HECW1      | 0.73932  | 1.16E-74    | 23072  |
| NUAK1      | 0.738933 | 1.52E-74    | 9891   |
| HTRA1      | 0.73866  | 1.84E-74    | 5654   |
| PRICKLE1   | 0.738573 | 1.95E-74    | 144165 |
| GFPT2      | 0.736133 | 1.04E-73    | 9945   |
| FIBIN      | 0.734362 | 3.44E-73    | 387758 |
| CERCAM     | 0.733901 | 4.70E-73    | 51148  |
| VGLL3      | 0.73237  | 1.32E-72    | 389136 |
| LTBP2      | 0.732342 | 1.34E-72    | 4053   |
| DSE        | 0.731174 | 2.92E-72    | 29940  |
| KCNJ15     | 0.730791 | 3.77E-72    | 3772   |
| PXDN       | 0.729544 | 8.62E-72    | 7837   |
| PPEF1      | 0.728251 | 2.02E-71    | 5475   |
| THY1       | 0.726764 | 5.36E-71    | 7070   |
| GLT8D2     | 0.726573 | 6.07E-71    | 83468  |
| C5orf46    | 0.726047 | 8.55E-71    | 389336 |
| LZTS1      | 0.72551  | 1.21E-70    | 11178  |
| GPR68      | 0.7248   | 1.92E-70    | 8111   |
| ZNF469     | 0.724453 | 2.40E-70    | 84627  |
| PPFIA2     | 0.723362 | 4.85E-70    | 8499   |
| CTSK       | 0.722376 | 9.14E-70    | 1513   |
| PKD2       | 0.722148 | 1.06E-69    | 5311   |
| COL15A1    | 0.7221   | 1.09E-69    | 1306   |
| LPAR4      | 0.720906 | 2.34E-69    | 2846   |
| TNFSF4     | 0.720714 | 2.64E-69    | 7292   |
| CSGALNACT2 | 0.718476 | 1.09E-68    | 55454  |
| MRC2       | 0.718258 | 1.25E-68    | 9902   |
| ADAMTS2    | 0.7181   | 1.38E-68    | 9509   |
| CDK14      | 0.71603  | 5.03E-68    | 5218   |
| ITGAV      | 0.71512  | 8.86E-68    | 3685   |
| SGIP1      | 0.713602 | 2.27E-67    | 84251  |
| PABPC4L    | 0.713393 | 2.58E-67    | 132430 |
| ATP10A     | 0.712534 | 4.37E-67    | 57194  |
| GGT5       | 0.712433 | 4.65E-67    | 2687   |
| HOPX       | 0.712357 | 4.87E-67    | 84525  |
| IQCA1      | 0.711675 | 7.40E-67    | 79781  |
| WNT2       | 0.710033 | 2.01E-66    | 7472   |
| PDGFRL     | 0.709197 | 3.34E-66    | 5157   |
| NRP1       | 0.708415 | 5.35E-66    | 8829   |
| MMP14      | 0.707837 | 7.58E-66    | 4323   |
| ALPK2      | 0.70745  | 9.57E-66    | 115701 |
| MMP16      | 0.701938 | 2.52E-64    | 4325   |
| FN1        | 0.701689 | 2.92E-64    | 2335   |
| CYP1B1     | 0.700994 | 4.38E-64    | 1545   |
| HMCN1      | 0.700541 | 5.71E-64    | 83872  |
| GJA1       | 0.699903 | 8.28E-64    | 2697   |



|          |          |             |        |
|----------|----------|-------------|--------|
| MRAS     | 0.69892  | 1.47E-63    | 22808  |
| ISLR     | 0.697988 | 2.51E-63    | 3671   |
| RAI14    | 0.697175 | 4.01E-63    | 26064  |
| ZNF521   | 0.697088 | 4.22E-63    | 25925  |
| ENTPD1   | 0.696881 | 4.75E-63    | 953    |
| ADAMTS16 | 0.696704 | 5.26E-63    | 170690 |
| ADAMTS5  | 0.695948 | 8.11E-63    | 11096  |
| GNB4     | 0.695217 | 1.23E-62    | 59345  |
| FRMD6    | 0.694267 | 2.12E-62    | 122786 |
| GPX8     | 0.693601 | 3.09E-62    | 493869 |
| RCN3     | 0.693216 | 3.84E-62    | 57333  |
| COL24A1  | 0.69271  | 5.11E-62    | 255631 |
| MSC      | 0.690444 | 1.83E-61    | 9242   |
| GAS1     | 0.689889 | 2.49E-61    | 2619   |
| SCARF2   | 0.68896  | 4.18E-61    | 91179  |
| ARSI     | 0.688117 | 6.68E-61    | 340075 |
| TIMP2    | 0.685413 | 2.96E-60    | 7077   |
| SERPINF1 | 0.684398 | 5.17E-60    | 5176   |
| CYP7B1   | 0.683623 | 7.88E-60    | 9420   |
| SYNDIG1  | 0.683266 | 9.57E-60    | 79953  |
| SDC2     | 0.682673 | 1.32E-59    | 6383   |
| CLEC5A   | 0.681779 | 2.14E-59    | 23601  |
| ANGPTL2  | 0.681083 | 3.12E-59    | 23452  |
| SLITRK4  | 0.680984 | 3.29E-59    | 139065 |
| NID2     | 0.680663 | 3.91E-59    | 22795  |
| CHST1    | 0.67959  | 6.96E-59    | 8534   |
| LHFP     | 0.678975 | 9.66E-59 NA |        |
| NOTCH3   | 0.678625 | 1.17E-58    | 4854   |
| GPR1     | 0.67813  | 1.52E-58    | 2825   |
| PODNL1   | 0.678061 | 1.57E-58    | 79883  |
| CCDC8    | 0.677591 | 2.02E-58    | 83987  |
| MSR1     | 0.676871 | 2.96E-58    | 4481   |
| COL16A1  | 0.676192 | 4.24E-58    | 1307   |
| VEGFC    | 0.674719 | 9.22E-58    | 7424   |
| RUNX2    | 0.674049 | 1.31E-57    | 860    |
| ZNF532   | 0.673962 | 1.37E-57    | 55205  |
| SERPING1 | 0.67363  | 1.63E-57    | 710    |
| GDF6     | 0.672182 | 3.47E-57    | 392255 |
| LPPR4    | 0.671697 | 4.47E-57 NA |        |
| MMP2     | 0.671535 | 4.86E-57    | 4313   |
| ERMN     | 0.670447 | 8.54E-57    | 57471  |
| FAM20A   | 0.670335 | 9.04E-57    | 54757  |
| SNAI2    | 0.669787 | 1.20E-56    | 6591   |
| LMCD1    | 0.66922  | 1.61E-56    | 29995  |
| DKK3     | 0.666358 | 6.94E-56    | 27122  |
| EVC      | 0.665982 | 8.40E-56    | 2121   |
| COMP     | 0.665332 | 1.17E-55    | 1311   |
| SFRP2    | 0.663867 | 2.45E-55    | 6423   |
| PDPN     | 0.663092 | 3.61E-55    | 10630  |
| CTGF     | 0.662941 | 3.90E-55 NA |        |
| MOV10L1  | 0.662886 | 4.01E-55    | 54456  |
| KAL1     | 0.662213 | 5.62E-55 NA |        |
| PCDH17   | 0.661103 | 9.77E-55    | 27253  |
| QKI      | 0.660923 | 1.07E-54    | 9444   |
| GPNMB    | 0.660661 | 1.22E-54    | 10457  |
| PRR16    | 0.659349 | 2.34E-54    | 51334  |
| PCOLCE   | 0.658729 | 3.17E-54    | 5118   |
| PCDHGA12 | 0.658687 | 3.24E-54    | 26025  |
| GLIS2    | 0.657526 | 5.74E-54    | 84662  |
| MEDAG    | 0.656664 | 8.76E-54    | 84935  |

|          |          |             |        |
|----------|----------|-------------|--------|
| IGFBP7   | 0.656526 | 9.37E-54    | 3490   |
| FNDC4    | 0.65452  | 2.49E-53    | 64838  |
| LAMA4    | 0.654386 | 2.66E-53    | 3910   |
| HEG1     | 0.654374 | 2.68E-53    | 57493  |
| HTRA4    | 0.653135 | 4.88E-53    | 203100 |
| GREM1    | 0.652704 | 6.01E-53    | 26585  |
| PLXNC1   | 0.652673 | 6.10E-53    | 10154  |
| CALCRL   | 0.652661 | 6.13E-53    | 10203  |
| SPOCD1   | 0.651923 | 8.75E-53    | 90853  |
| CLEC11A  | 0.65144  | 1.10E-52    | 6320   |
| CHST11   | 0.650907 | 1.43E-52    | 50515  |
| MYH10    | 0.650063 | 2.13E-52    | 4628   |
| TCF4     | 0.649816 | 2.40E-52    | 6925   |
| ELK3     | 0.649289 | 3.09E-52    | 2004   |
| LOXL1    | 0.647485 | 7.27E-52    | 4016   |
| C1S      | 0.647086 | 8.78E-52    | 716    |
| GPR116   | 0.645966 | 1.49E-51 NA |        |
| P3H1     | 0.645376 | 1.96E-51    | 64175  |
| SLC1A3   | 0.644959 | 2.39E-51    | 6507   |
| FKBP7    | 0.644056 | 3.64E-51    | 51661  |
| CD84     | 0.644002 | 3.74E-51    | 8832   |
| HHIPL1   | 0.643966 | 3.80E-51    | 84439  |
| CCIN     | 0.643732 | 4.24E-51    | 881    |
| AQP9     | 0.642235 | 8.51E-51    | 366    |
| COL18A1  | 0.642042 | 9.31E-51    | 80781  |
| VIM      | 0.641997 | 9.50E-51    | 7431   |
| PRKD1    | 0.641952 | 9.70E-51    | 5587   |
| CPXM1    | 0.641305 | 1.31E-50    | 56265  |
| BEND6    | 0.641118 | 1.43E-50    | 221336 |
| LOXL2    | 0.640651 | 1.77E-50    | 4017   |
| SLC11A1  | 0.639363 | 3.20E-50    | 6556   |
| C1QTNF6  | 0.638473 | 4.82E-50    | 114904 |
| EVC2     | 0.638331 | 5.14E-50    | 132884 |
| EBF2     | 0.638319 | 5.17E-50    | 64641  |
| MCC      | 0.637742 | 6.72E-50    | 4163   |
| EFEMP2   | 0.637621 | 7.10E-50    | 30008  |
| SGCD     | 0.637204 | 8.59E-50    | 6444   |
| PLXNA4   | 0.636058 | 1.45E-49    | 91584  |
| CALU     | 0.635586 | 1.79E-49    | 813    |
| HS3ST3A1 | 0.635298 | 2.04E-49    | 9955   |
| SLC6A1   | 0.634898 | 2.44E-49    | 6529   |
| AFAP1L1  | 0.632298 | 7.86E-49    | 134265 |
| MMP19    | 0.631705 | 1.02E-48    | 4327   |
| FCGR3A   | 0.629009 | 3.39E-48    | 2214   |
| CPZ      | 0.628521 | 4.21E-48    | 8532   |
| LTBP1    | 0.628015 | 5.26E-48    | 4052   |
| MAFB     | 0.626918 | 8.52E-48    | 9935   |
| KIRREL   | 0.626818 | 8.90E-48 NA |        |
| FUT11    | 0.626511 | 1.02E-47    | 170384 |
| C10orf10 | 0.626096 | 1.22E-47 NA |        |
| PTGIR    | 0.625481 | 1.60E-47    | 5739   |
| THBS1    | 0.625234 | 1.78E-47    | 7057   |
| MFGE8    | 0.625172 | 1.83E-47    | 4240   |
| BCL6B    | 0.625063 | 1.92E-47    | 255877 |
| TLR2     | 0.624612 | 2.33E-47    | 7097   |
| FILIP1L  | 0.624317 | 2.65E-47    | 11259  |
| NREP     | 0.624251 | 2.73E-47    | 9315   |
| UBE2E2   | 0.624111 | 2.90E-47    | 7325   |
| TWIST1   | 0.623794 | 3.32E-47    | 7291   |
| LRRC32   | 0.623442 | 3.87E-47    | 2615   |

|             |          |             |        |
|-------------|----------|-------------|--------|
| DACT1       | 0.623417 | 3.91E-47    | 51339  |
| TMEM45A     | 0.623114 | 4.46E-47    | 55076  |
| IL1R1       | 0.622251 | 6.48E-47    | 3554   |
| BASP1       | 0.621893 | 7.56E-47    | 10409  |
| ELTD1       | 0.621673 | 8.31E-47 NA |        |
| CLIC4       | 0.621508 | 8.92E-47    | 25932  |
| PLXDC1      | 0.621503 | 8.94E-47    | 57125  |
| MN1         | 0.620822 | 1.20E-46    | 4330   |
| PCDH12      | 0.620759 | 1.23E-46    | 51294  |
| OSMR        | 0.620552 | 1.34E-46    | 9180   |
| LBH         | 0.620341 | 1.47E-46    | 81606  |
| CHST3       | 0.620325 | 1.48E-46    | 9469   |
| MITF        | 0.619268 | 2.33E-46    | 4286   |
| MOXD1       | 0.618846 | 2.79E-46    | 26002  |
| F2R         | 0.618572 | 3.13E-46    | 2149   |
| PPP1R18     | 0.617888 | 4.19E-46    | 170954 |
| CORIN       | 0.617177 | 5.66E-46    | 10699  |
| TENM3       | 0.616322 | 8.12E-46    | 55714  |
| ADAMTS7     | 0.616073 | 9.02E-46    | 11173  |
| COL4A1      | 0.615848 | 9.92E-46    | 1282   |
| TM6SF1      | 0.61536  | 1.22E-45    | 53346  |
| FCGR1A      | 0.615318 | 1.24E-45    | 2209   |
| KIF26B      | 0.614937 | 1.45E-45    | 55083  |
| MEX3B       | 0.614707 | 1.60E-45    | 84206  |
| ADAMTS4     | 0.613472 | 2.69E-45    | 9507   |
| EPYC        | 0.612803 | 3.55E-45    | 1833   |
| COL6A2      | 0.612683 | 3.73E-45    | 1292   |
| CEP170      | 0.612283 | 4.41E-45    | 9859   |
| ITGAX       | 0.611854 | 5.27E-45    | 3687   |
|             | 4-9月     | 5.91E-45 NA |        |
| OSCAR       | 0.610393 | 9.66E-45    | 126014 |
| TREM1       | 0.610263 | 1.02E-44    | 54210  |
| CILP2       | 0.610181 | 1.05E-44    | 148113 |
| PALM2-AKAP2 | 0.609421 | 1.44E-44 NA |        |
| C5AR1       | 0.608023 | 2.56E-44    | 728    |
| CCDC102B    | 0.607816 | 2.79E-44    | 79839  |
| GSC         | 0.606789 | 4.24E-44    | 145258 |
| MATN3       | 0.60604  | 5.75E-44    | 4148   |
| MFAP2       | 0.604255 | 1.19E-43    | 4237   |
| ADAMTS10    | 0.602571 | 2.34E-43    | 81794  |
| PIEZO2      | 0.601939 | 3.01E-43    | 63895  |
| VASH1       | 0.601602 | 3.45E-43    | 22846  |
| LCA5        | 0.601494 | 3.60E-43    | 167691 |
| CCDC88A     | 0.601386 | 3.76E-43    | 55704  |
| SERPINH1    | 0.599    | 9.73E-43    | 871    |
| RBMS1       | 0.598631 | 1.13E-42    | 5937   |
| C1R         | 0.598225 | 1.32E-42    | 715    |
| TGFBR1      | 0.596332 | 2.79E-42    | 7046   |
| TREM2       | 0.596037 | 3.13E-42    | 54209  |
| HAVCR2      | 0.595357 | 4.09E-42    | 84868  |
| CTSL        | 0.595088 | 4.55E-42    | 1514   |
| HTR2A       | 0.594584 | 5.54E-42    | 3356   |
| PILRA       | 0.59364  | 8.01E-42    | 29992  |
| COPZ2       | 0.593594 | 8.15E-42    | 51226  |
| CNIH3       | 0.593077 | 9.96E-42    | 149111 |
| COL6A1      | 0.592902 | 1.07E-41    | 1291   |
| TMEM119     | 0.592636 | 1.18E-41    | 338773 |
| COL5A3      | 0.592177 | 1.41E-41    | 50509  |
| SYDE1       | 0.591903 | 1.57E-41    | 85360  |
| TRPS1       | 0.591267 | 2.01E-41    | 7227   |

|          |          |             |        |
|----------|----------|-------------|--------|
| ITGAM    | 0.591133 | 2.12E-41    | 3684   |
| COL4A2   | 0.590214 | 3.01E-41    | 1284   |
| S1PR3    | 0.589936 | 3.36E-41    | 1903   |
| NPR3     | 0.589448 | 4.05E-41    | 4883   |
| SIGLEC9  | 0.589388 | 4.14E-41    | 27180  |
| COL22A1  | 0.589229 | 4.40E-41    | 169044 |
| APCDD1L  | 0.589157 | 4.52E-41    | 164284 |
| FPR3     | 0.589145 | 4.55E-41    | 2359   |
| TM4SF19  | 0.588904 | 4.99E-41    | 116211 |
| SPON2    | 0.588769 | 5.25E-41    | 10417  |
| ARHGAP31 | 0.588152 | 6.65E-41    | 57514  |
| ALDH1A3  | 0.588041 | 6.93E-41    | 220    |
| GLI2     | 0.587493 | 8.55E-41    | 2736   |
| CLEC7A   | 0.587298 | 9.21E-41    | 64581  |
| FOXS1    | 0.586628 | 1.19E-40    | 2307   |
| TCTEX1D1 | 0.586475 | 1.26E-40    | 200132 |
| APOC1    | 0.586132 | 1.43E-40    | 341    |
| FAM63B   | 0.585872 | 1.58E-40 NA |        |
| LILRB4   | 0.585713 | 1.68E-40    | 11006  |
| ZNF365   | 0.585653 | 1.72E-40    | 22891  |
| SH3PXD2B | 0.585525 | 1.81E-40    | 285590 |
| CCDC81   | 0.585525 | 1.81E-40    | 60494  |
| TMEM26   | 0.583503 | 3.87E-40    | 219623 |
| NETO1    | 0.582985 | 4.70E-40    | 81832  |
| FCGR2A   | 0.582965 | 4.74E-40    | 2212   |
| TPST1    | 0.582605 | 5.42E-40    | 8460   |
| PDCD1LG2 | 0.58194  | 6.95E-40    | 80380  |
| IKBIP    | 0.581691 | 7.63E-40    | 121457 |
| GPR85    | 0.581524 | 8.12E-40    | 54329  |
| ZEB2     | 0.58151  | 8.17E-40    | 9839   |
| DGKI     | 0.581365 | 8.62E-40    | 9162   |
| CRISPLD2 | 0.580976 | 9.97E-40    | 83716  |
| FKBP14   | 0.579916 | 1.48E-39    | 55033  |
| PRAM1    | 0.578962 | 2.11E-39    | 84106  |
| FAM126A  | 0.578866 | 2.18E-39    | 84668  |
| C1QTNF3  | 0.578522 | 2.48E-39    | 114899 |
| ZFHX4    | 0.578243 | 2.75E-39    | 79776  |
| HECW2    | 0.577729 | 3.32E-39    | 57520  |
| SIRPB2   | 0.577626 | 3.45E-39    | 284759 |
| ZCCHC5   | 0.577244 | 3.97E-39 NA |        |
| RFTN1    | 0.576081 | 6.08E-39    | 23180  |
| ZNF281   | 0.575467 | 7.62E-39    | 23528  |
| ST3GAL6  | 0.575414 | 7.77E-39    | 10402  |
| C14orf37 | 0.575343 | 7.97E-39 NA |        |
| MNDA     | 0.57533  | 8.01E-39    | 4332   |
| IL1RAP   | 0.57527  | 8.18E-39    | 3556   |
| ARL10    | 0.575128 | 8.62E-39    | 285598 |
| LAYN     | 0.575042 | 8.90E-39    | 143903 |
| CAMK1G   | 0.574801 | 9.72E-39    | 57172  |
| TNFSF13B | 0.574379 | 1.13E-38    | 10673  |
| RUNX1    | 0.574235 | 1.19E-38    | 861    |
| CYR61    | 0.574144 | 1.23E-38 NA |        |
| ARL4C    | 0.57403  | 1.29E-38    | 10123  |
| ALOX5AP  | 0.573384 | 1.63E-38    | 241    |
| MYO5A    | 0.57307  | 1.82E-38    | 4644   |
| ITPRIP   | 0.572962 | 1.90E-38    | 85450  |
| EMR2     | 0.572463 | 2.27E-38 NA |        |
| KDELC1   | 0.572128 | 2.56E-38 NA |        |
| NNMT     | 0.571772 | 2.92E-38    | 4837   |
| LATS2    | 0.571563 | 3.15E-38    | 26524  |

|          |          |             |        |
|----------|----------|-------------|--------|
| RFTN2    | 0.570682 | 4.32E-38    | 130132 |
| FMO2     | 0.570401 | 4.78E-38    | 2327   |
| DZIP1L   | 0.570327 | 4.91E-38    | 199221 |
| PHTF2    | 0.56999  | 5.54E-38    | 57157  |
| CHN1     | 0.569553 | 6.48E-38    | 1123   |
| FAT3     | 0.569366 | 6.93E-38    | 120114 |
| UBTD1    | 0.569089 | 7.65E-38    | 80019  |
| CD93     | 0.568365 | 9.91E-38    | 22918  |
| TIMP3    | 0.568277 | 1.02E-37    | 7078   |
| EFEMP1   | 0.568187 | 1.06E-37    | 2202   |
| MEIS3    | 0.567346 | 1.42E-37    | 56917  |
| P2RX7    | 0.567265 | 1.47E-37    | 5027   |
| SCUBE3   | 0.56667  | 1.81E-37    | 222663 |
| FCGR1B   | 0.566406 | 1.99E-37    | 2210   |
| HRH2     | 0.566298 | 2.07E-37    | 3274   |
| NLRP12   | 0.566198 | 2.14E-37    | 91662  |
| HEYL     | 0.565339 | 2.90E-37    | 26508  |
| FAM20C   | 0.565138 | 3.12E-37    | 56975  |
| FGR      | 0.565011 | 3.26E-37    | 2268   |
| GPR141   | 0.564194 | 4.34E-37    | 353345 |
| PTPN14   | 0.564058 | 4.56E-37    | 5784   |
| CCDC80   | 0.563792 | 5.00E-37    | 151887 |
| CTSB     | 0.563407 | 5.73E-37    | 1508   |
| CFH      | 0.563095 | 6.39E-37    | 3075   |
| VCAM1    | 0.562949 | 6.72E-37    | 7412   |
| ERG      | 0.562136 | 8.94E-37    | 2078   |
| ADAMTS3  | 0.561782 | 1.01E-36    | 9508   |
| AVPR1A   | 0.561462 | 1.13E-36    | 552    |
| CHSY1    | 0.561398 | 1.16E-36    | 22856  |
| VASN     | 0.5612   | 1.24E-36    | 114990 |
| LRRC8C   | 0.561073 | 1.30E-36    | 84230  |
| PCDH7    | 0.560985 | 1.34E-36    | 5099   |
| GLI1     | 0.56059  | 1.53E-36    | 2735   |
| ZFPM2    | 0.560144 | 1.79E-36    | 23414  |
| HTR2B    | 0.560029 | 1.86E-36    | 3357   |
| NTNG2    | 0.559613 | 2.15E-36    | 84628  |
| PLEKHO2  | 0.559043 | 2.62E-36    | 80301  |
| SRGAP2C  | 0.558545 | 3.11E-36    | 653464 |
| GUCA1A   | 0.558504 | 3.15E-36    | 2978   |
| MSN      | 0.558327 | 3.35E-36    | 4478   |
| PDGFB    | 0.558229 | 3.47E-36    | 5155   |
| SLC38A6  | 0.557937 | 3.84E-36    | 145389 |
| CYBB     | 0.557628 | 4.27E-36    | 1536   |
| DPYSL3   | 0.556628 | 6.02E-36    | 1809   |
| KLHL4    | 0.556627 | 6.02E-36    | 56062  |
| FAM101B  | 0.555894 | 7.74E-36 NA |        |
| RNF175   | 0.555239 | 9.68E-36    | 285533 |
| DOK6     | 0.554847 | 1.11E-35    | 220164 |
| LIMS1    | 0.55482  | 1.12E-35    | 3987   |
| VSTM4    | 0.55439  | 1.29E-35    | 196740 |
| CHRD     | 0.554222 | 1.37E-35    | 8646   |
| NLRC4    | 0.553898 | 1.53E-35    | 58484  |
| DLC1     | 0.553149 | 1.97E-35    | 10395  |
| CRISPLD1 | 0.55302  | 2.06E-35    | 83690  |
| NRP2     | 0.552952 | 2.11E-35    | 8828   |
| C8orf34  | 0.551278 | 3.71E-35    | 116328 |
| OLFML1   | 0.55092  | 4.18E-35    | 283298 |
| AKT3     | 0.550482 | 4.84E-35    | 10000  |
| FMNL3    | 0.55021  | 5.31E-35    | 91010  |
| SRGAP2B  | 0.550121 | 5.47E-35    | 647135 |

|          |          |             |        |
|----------|----------|-------------|--------|
| SLAMF8   | 0.548884 | 8.27E-35    | 56833  |
| TICAM2   | 0.548767 | 8.60E-35    | 353376 |
| DOCK4    | 0.54862  | 9.04E-35    | 9732   |
| C1orf162 | 0.548364 | 9.84E-35    | 128346 |
| RAB3IL1  | 0.547967 | 1.12E-34    | 5866   |
| PODN     | 0.547922 | 1.14E-34    | 127435 |
| GPX7     | 0.547895 | 1.15E-34    | 2882   |
| MMP11    | 0.546937 | 1.58E-34    | 4320   |
| SGTB     | 0.546563 | 1.79E-34    | 54557  |
| LILRB3   | 0.546266 | 1.98E-34    | 11025  |
| CCDC36   | 0.54617  | 2.04E-34 NA |        |
| TIE1     | 0.546075 | 2.10E-34    | 7075   |
| STC1     | 0.546032 | 2.14E-34    | 6781   |
| CDO1     | 0.545898 | 2.23E-34    | 1036   |
| NRK      | 0.544425 | 3.63E-34    | 203447 |
| ADAMTS6  | 0.544222 | 3.88E-34    | 11174  |
| WIPF1    | 0.543805 | 4.45E-34    | 7456   |
| BTBD19   | 0.543609 | 4.74E-34    | 149478 |
| METTL11B | 0.543598 | 4.76E-34    | 149281 |
| FLT1     | 0.543504 | 4.91E-34    | 2321   |
| DIRC1    | 0.542585 | 6.64E-34    | 116093 |
| RAB7B    | 0.542116 | 7.74E-34    | 338382 |
| LAPTM5   | 0.541871 | 8.38E-34    | 7805   |
| SOX11    | 0.541655 | 8.99E-34    | 6664   |
| DCSTAMP  | 0.540251 | 1.42E-33    | 81501  |
| GPR124   | 0.540217 | 1.44E-33 NA |        |
| CD86     | 0.539859 | 1.61E-33    | 942    |
| CCR1     | 0.539821 | 1.63E-33    | 1230   |
| RAB34    | 0.539779 | 1.65E-33    | 83871  |
| MILR1    | 0.539167 | 2.02E-33    | 284021 |
| PAPPA    | 0.538805 | 2.27E-33    | 5069   |
| RNASE2   | 0.538238 | 2.72E-33    | 6036   |
| GJA5     | 0.538206 | 2.75E-33    | 2702   |
| ARMC9    | 0.538198 | 2.76E-33    | 80210  |
| CDH13    | 0.537962 | 2.98E-33    | 1012   |
| BCL2A1   | 0.53789  | 3.05E-33    | 597    |
| ITGB1    | 0.537457 | 3.50E-33    | 3688   |
| FBLN2    | 0.537346 | 3.63E-33    | 2199   |
| EGR2     | 0.53705  | 3.99E-33    | 1959   |
| TFEC     | 0.536775 | 4.36E-33    | 22797  |
| RHOQ     | 0.536346 | 5.00E-33    | 23433  |
| TWSG1    | 0.536221 | 5.21E-33    | 57045  |
| MS4A14   | 0.536172 | 5.29E-33    | 84689  |
| LAMB2    | 0.535715 | 6.12E-33    | 3913   |
| TPRG1    | 0.535388 | 6.79E-33    | 285386 |
| LY96     | 0.535107 | 7.43E-33    | 23643  |
| TDRD6    | 0.535104 | 7.44E-33    | 221400 |
| NOTCH4   | 0.535097 | 7.46E-33    | 4855   |
| RAB8B    | 0.534465 | 9.12E-33    | 51762  |
| CDKL5    | 0.534292 | 9.64E-33    | 6792   |
| NCF2     | 0.534123 | 1.02E-32    | 4688   |
| ATXN1    | 0.533532 | 1.23E-32    | 6310   |
| FGF7     | 0.533363 | 1.29E-32    | 2252   |
| LDB2     | 0.533306 | 1.32E-32    | 9079   |
| CAMSAP2  | 0.533072 | 1.42E-32    | 23271  |
| C3AR1    | 0.532944 | 1.48E-32    | 719    |
| TMEM86A  | 0.532786 | 1.55E-32    | 144110 |
| MDFIC    | 0.532554 | 1.67E-32    | 29969  |
| AMZ1     | 0.532362 | 1.78E-32    | 155185 |
| GPR84    | 0.532217 | 1.86E-32    | 53831  |

|          |          |             |        |
|----------|----------|-------------|--------|
| BNC2     | 0.532217 | 1.86E-32    | 54796  |
| C3orf80  | 0.531812 | 2.11E-32    | 401097 |
| CD248    | 0.531583 | 2.27E-32    | 57124  |
| FCER1G   | 0.531559 | 2.29E-32    | 2207   |
| LAIR1    | 0.531053 | 2.68E-32    | 3903   |
| NAV1     | 0.530941 | 2.78E-32    | 89796  |
| FAM19A1  | 0.530819 | 2.89E-32 NA |        |
| SLC2A3   | 0.530802 | 2.91E-32    | 6515   |
| ANGPT2   | 0.530541 | 3.15E-32    | 285    |
| KLF7     | 0.530338 | 3.36E-32    | 8609   |
| DNAJC5B  | 0.530029 | 3.70E-32    | 85479  |
| HAMP     | 0.529917 | 3.84E-32    | 57817  |
| JAKMIP2  | 0.529843 | 3.93E-32    | 9832   |
| ARHGAP29 | 0.529627 | 4.20E-32    | 9411   |
| HS3ST2   | 0.5295   | 4.37E-32    | 9956   |
| EMILIN1  | 0.529263 | 4.71E-32    | 11117  |
| SPHK1    | 0.529191 | 4.82E-32    | 8877   |
| PECAM1   | 0.528902 | 5.27E-32    | 5175   |
| HK3      | 0.528767 | 5.50E-32    | 3101   |
| RARB     | 0.528619 | 5.76E-32    | 5915   |
| SLFN5    | 0.528452 | 6.07E-32    | 162394 |
| SPSB1    | 0.528087 | 6.80E-32    | 80176  |
| P3H3     | 0.528044 | 6.89E-32    | 10536  |
| IGFBP5   | 0.527977 | 7.03E-32    | 3488   |
| ANKRD6   | 0.52776  | 7.53E-32    | 22881  |
| PTGER3   | 0.527182 | 9.01E-32    | 5733   |
| FLRT2    | 0.526381 | 1.15E-31    | 23768  |
| ZSWIM4   | 0.526374 | 1.16E-31    | 65249  |
| CCR8     | 0.526374 | 1.16E-31    | 1237   |
| LOXL3    | 0.526093 | 1.26E-31    | 84695  |
| ARHGEF15 | 0.525655 | 1.45E-31    | 22899  |
| CLEC4E   | 0.524931 | 1.81E-31    | 26253  |
| SLA      | 0.524816 | 1.87E-31    | 6503   |
| DSEL     | 0.524075 | 2.35E-31    | 92126  |
| A4GALT   | 0.523796 | 2.56E-31    | 53947  |
| AAED1    | 0.523246 | 3.04E-31 NA |        |
| PTHLH    | 0.522437 | 3.89E-31    | 5744   |
| LPHN2    | 0.522223 | 4.15E-31 NA |        |
| HIVEP2   | 0.522191 | 4.19E-31    | 3097   |
| SNX18    | 0.522158 | 4.24E-31    | 112574 |
| HOOK3    | 0.522149 | 4.25E-31    | 84376  |
| RGS16    | 0.522103 | 4.31E-31    | 6004   |
| CD80     | 0.521579 | 5.05E-31    | 941    |
| NAV3     | 0.521389 | 5.36E-31    | 89795  |
| ZNF843   | 0.52137  | 5.39E-31    | 283933 |
| NCKAP5L  | 0.521355 | 5.41E-31    | 57701  |
| TRPC1    | 0.521139 | 5.78E-31    | 7220   |
| PTGIS    | 0.520858 | 6.30E-31    | 5740   |
| TPM4     | 0.520817 | 6.37E-31    | 7171   |
| ANXA5    | 0.520686 | 6.63E-31    | 308    |
| EHD3     | 0.518547 | 1.27E-30    | 30845  |
| FAM198B  | 0.518436 | 1.31E-30 NA |        |
| WWC2     | 0.517491 | 1.74E-30    | 80014  |
| FGF14    | 0.517426 | 1.78E-30    | 2259   |
| ITGB5    | 0.517299 | 1.85E-30    | 3693   |
| DENND5A  | 0.517193 | 1.91E-30    | 23258  |
| ADPRH    | 0.516723 | 2.20E-30    | 141    |
| PALMD    | 0.516533 | 2.33E-30    | 54873  |
| NCAM2    | 0.516317 | 2.48E-30    | 4685   |
| CSDC2    | 0.515558 | 3.11E-30    | 27254  |



|          |          |             |        |
|----------|----------|-------------|--------|
| TNFRSF9  | 0.515492 | 3.18E-30    | 3604   |
| TIMP1    | 0.515261 | 3.40E-30    | 7076   |
| TMEM204  | 0.515136 | 3.53E-30    | 79652  |
| APOE     | 0.514985 | 3.69E-30    | 348    |
| CCDC3    | 0.514861 | 3.83E-30    | 83643  |
| IFFO1    | 0.513859 | 5.17E-30    | 25900  |
| CLEC4D   | 0.513213 | 6.26E-30    | 338339 |
| KMO      | 0.512871 | 6.93E-30    | 8564   |
| BMPR2    | 0.512596 | 7.51E-30    | 659    |
| SSH1     | 0.512211 | 8.42E-30    | 54434  |
| OSBPL8   | 0.512157 | 8.56E-30    | 114882 |
| SUCNR1   | 0.512111 | 8.67E-30    | 56670  |
| RORB     | 0.511721 | 9.73E-30    | 6096   |
| PTPRM    | 0.511564 | 1.02E-29    | 5797   |
| SRGAP2   | 0.511328 | 1.09E-29    | 23380  |
| SLFN12   | 0.51123  | 1.12E-29    | 55106  |
| LAMC1    | 0.510556 | 1.37E-29    | 3915   |
| SULF2    | 0.510121 | 1.56E-29    | 55959  |
| DAZL     | 0.509666 | 1.78E-29    | 1618   |
| SLC46A2  | 0.509468 | 1.89E-29    | 57864  |
| CYP27C1  | 0.509408 | 1.92E-29    | 339761 |
| CALHM2   | 0.509136 | 2.08E-29    | 51063  |
| PLA2G7   | 0.509063 | 2.13E-29    | 7941   |
| FOXC2    | 0.509026 | 2.15E-29    | 2303   |
| MYOF     | 0.508989 | 2.17E-29    | 26509  |
| SLC24A3  | 0.508894 | 2.23E-29    | 57419  |
| RNF180   | 0.508753 | 2.33E-29    | 285671 |
| C3       | 0.508395 | 2.58E-29    | 718    |
| SIRPB1   | 0.507978 | 2.92E-29    | 10326  |
| KLF17    | 0.507936 | 2.95E-29    | 128209 |
| PLAT     | 0.507925 | 2.96E-29    | 5327   |
| KLRD1    | 0.507755 | 3.11E-29    | 3824   |
| LIPN     | 0.507725 | 3.14E-29    | 643418 |
| ARHGEF17 | 0.50745  | 3.40E-29    | 9828   |
| BHLHE22  | 0.50719  | 3.67E-29    | 27319  |
| PIP4K2A  | 0.507087 | 3.78E-29    | 5305   |
| MFRP     | 0.506769 | 4.15E-29    | 83552  |
| GPR137B  | 0.506577 | 4.39E-29    | 7107   |
| C11orf88 | 0.506522 | 4.46E-29 NA |        |
| KCNJ8    | 0.506304 | 4.75E-29    | 3764   |
| LILRA6   | 0.506255 | 4.82E-29    | 79168  |
| BMP1     | 0.506037 | 5.13E-29    | 649    |
| LGALS1   | 0.505812 | 5.47E-29    | 3956   |
| DRAM1    | 0.505585 | 5.85E-29    | 55332  |
| PEA15    | 0.505511 | 5.97E-29    | 8682   |
| ELN      | 0.504808 | 7.32E-29    | 2006   |
| DZIP1    | 0.50434  | 8.37E-29    | 22873  |
| PXDNL    | 0.504287 | 8.50E-29    | 137902 |
| HAPLN3   | 0.503638 | 1.02E-28    | 145864 |
| WWTR1    | 0.503476 | 1.07E-28    | 25937  |
| CTIF     | 0.503467 | 1.08E-28    | 9811   |
| COLEC12  | 0.503039 | 1.22E-28    | 81035  |
| EFS      | 0.502978 | 1.24E-28    | 10278  |
| FHL3     | 0.502016 | 1.63E-28    | 2275   |
| THSD7A   | 0.501827 | 1.72E-28    | 221981 |
| GRP      | 0.501725 | 1.77E-28    | 2922   |
| FLT4     | 0.501277 | 2.01E-28    | 2324   |
| BACE1    | 0.500613 | 2.43E-28    | 23621  |
| NLGN2    | 0.50054  | 2.49E-28    | 57555  |
| CCL2     | 0.499955 | 2.93E-28    | 6347   |

|          |          |             |           |
|----------|----------|-------------|-----------|
| SNED1    | 0.499883 | 2.99E-28    | 25992     |
| DCN      | 0.499651 | 3.20E-28    | 1634      |
| GUCY1B3  | 0.499632 | 3.22E-28 NA |           |
| RNF144A  | 0.499202 | 3.63E-28    | 9781      |
| SNX10    | 0.498711 | 4.17E-28    | 29887     |
| GEM      | 0.498337 | 4.64E-28    | 2669      |
| LILRB2   | 0.498145 | 4.90E-28    | 10288     |
| OMD      | 0.497896 | 5.25E-28    | 4958      |
| KERA     | 0.497755 | 5.47E-28    | 11081     |
| GPR4     | 0.497542 | 5.81E-28    | 2828      |
| RUNX1T1  | 0.497399 | 6.05E-28    | 862       |
| ZNF667   | 0.497376 | 6.08E-28    | 63934     |
| ENG      | 0.497311 | 6.20E-28    | 2022      |
| HSD11B1  | 0.497166 | 6.45E-28    | 3290      |
| SSC5D    | 0.497044 | 6.68E-28    | 284297    |
| PURG     | 0.497026 | 6.71E-28    | 29942     |
| ITGB2    | 0.49693  | 6.90E-28    | 3689      |
| GLI3     | 0.496177 | 8.52E-28    | 2737      |
| LAMP5    | 0.495937 | 9.11E-28    | 24141     |
| FZD4     | 0.495764 | 9.57E-28    | 8322      |
| CD300C   | 0.49532  | 1.08E-27    | 10871     |
| PTPN12   | 0.495248 | 1.11E-27    | 5782      |
| MMP9     | 0.49496  | 1.20E-27    | 4318      |
| LCP2     | 0.494682 | 1.29E-27    | 3937      |
| MPDZ     | 0.494476 | 1.37E-27    | 8777      |
| ABCA1    | 0.494471 | 1.37E-27    | 19        |
| EGFLAM   | 0.49432  | 1.43E-27    | 133584    |
| MAP3K12  | 0.494227 | 1.47E-27    | 7786      |
| CNPY4    | 0.494102 | 1.52E-27    | 245812    |
| MAP4K4   | 0.493589 | 1.76E-27    | 9448      |
| GJA4     | 0.493232 | 1.94E-27    | 2701      |
| B3GNT9   | 0.492986 | 2.08E-27    | 84752     |
| TGFB1    | 0.492612 | 2.30E-27    | 7040      |
| KLHL5    | 0.492337 | 2.48E-27    | 51088     |
| DCBLD1   | 0.492236 | 2.55E-27    | 285761    |
| GPR65    | 0.492074 | 2.67E-27    | 8477      |
| ALDH1L2  | 0.492012 | 2.72E-27    | 160428    |
| APBA2    | 0.491852 | 2.84E-27    | 321       |
| APELA    | 0.491439 | 3.18E-27    | 100506013 |
| GLT1D1   | 0.491386 | 3.23E-27    | 144423    |
| SFMBT2   | 0.490903 | 3.69E-27    | 57713     |
| PHLDB2   | 0.490875 | 3.72E-27    | 90102     |
| ALPL     | 0.490162 | 4.53E-27    | 249       |
| CDH6     | 0.490111 | 4.59E-27    | 1004      |
| SH3PXD2A | 0.489464 | 5.48E-27    | 9644      |
| ETS1     | 0.489273 | 5.78E-27    | 2113      |
| MAP1B    | 0.489123 | 6.02E-27    | 4131      |
| HEY2     | 0.489065 | 6.12E-27    | 23493     |
| GM2A     | 0.488899 | 6.40E-27    | 2760      |
| CCL7     | 0.488476 | 7.19E-27    | 6354      |
| TBCEL    | 0.488376 | 7.39E-27    | 219899    |
| PNMAL2   | 0.487801 | 8.64E-27 NA |           |
| SLC12A4  | 0.487748 | 8.77E-27    | 6560      |
| GUCY1A3  | 0.487739 | 8.79E-27 NA |           |
| THBS3    | 0.487645 | 9.02E-27    | 7059      |
| EOGT     | 0.48749  | 9.41E-27    | 285203    |
| ATP8B2   | 0.48726  | 1.00E-26    | 57198     |
| MACF1    | 0.486788 | 1.14E-26    | 23499     |
| GRM2     | 0.486523 | 1.22E-26    | 2912      |
| AXL      | 0.486441 | 1.25E-26    | 558       |

|          |          |             |        |
|----------|----------|-------------|--------|
| RXFP1    | 0.486269 | 1.31E-26    | 59350  |
| FAM160B1 | 0.485724 | 1.52E-26    | 57700  |
| SOCS5    | 0.485618 | 1.56E-26    | 9655   |
| KDR      | 0.485299 | 1.71E-26    | 3791   |
| NXN      | 0.484896 | 1.90E-26    | 64359  |
| G0S2     | 0.484705 | 2.00E-26    | 50486  |
| CRYGN    | 0.484574 | 2.07E-26    | 155051 |
| RASSF8   | 0.484467 | 2.13E-26    | 11228  |
| SOD2     | 0.484366 | 2.19E-26    | 6648   |
| RUSC2    | 0.483966 | 2.44E-26    | 9853   |
| HIP1     | 0.48263  | 3.50E-26    | 3092   |
| SSPN     | 0.482525 | 3.60E-26    | 8082   |
| KIF3C    | 0.482245 | 3.88E-26    | 3797   |
| LPPR2    | 0.481977 | 4.17E-26 NA |        |
| NOTCH2   | 0.48184  | 4.32E-26    | 4853   |
| SLIT2    | 0.481694 | 4.50E-26    | 9353   |
| ADAMTS14 | 0.481525 | 4.70E-26    | 140766 |
| FZD1     | 0.481208 | 5.12E-26    | 8321   |
| TRPV2    | 0.481126 | 5.23E-26    | 51393  |
| SEMA6B   | 0.480989 | 5.43E-26    | 10501  |
| EPHA3    | 0.480442 | 6.28E-26    | 2042   |
| BCL6     | 0.480272 | 6.57E-26    | 604    |
| FAM180A  | 0.480141 | 6.80E-26    | 389558 |
| TNFRSF8  | 0.479911 | 7.23E-26    | 943    |
| ESR1     | 0.479599 | 7.86E-26    | 2099   |
| SDS      | 0.479439 | 8.20E-26    | 10993  |
| ACVR1    | 0.479103 | 8.96E-26    | 90     |
| ENTHD1   | 0.479038 | 9.12E-26    | 150350 |
| PXDC1    | 0.478851 | 9.58E-26    | 221749 |
| PTAFR    | 0.478521 | 1.05E-25    | 5724   |
| FPR1     | 0.478516 | 1.05E-25    | 2357   |
| PDE1A    | 0.478243 | 1.13E-25    | 5136   |
| NFAM1    | 0.478178 | 1.14E-25    | 150372 |
| S1PR5    | 0.478135 | 1.16E-25    | 53637  |
| PANX1    | 0.478103 | 1.17E-25    | 24145  |
| MAP3K3   | 0.477422 | 1.40E-25    | 4215   |
| ICAM1    | 0.477106 | 1.52E-25    | 3383   |
| LILRA2   | 0.476886 | 1.61E-25    | 11027  |
| SNAI1    | 0.476346 | 1.85E-25    | 6615   |
| FCGR2B   | 0.47623  | 1.91E-25    | 2213   |
| SLC15A4  | 0.476078 | 1.99E-25    | 121260 |
| KIAA1462 | 0.475795 | 2.14E-25 NA |        |
| EMILIN2  | 0.475375 | 2.39E-25    | 84034  |
| SNX29    | 0.475246 | 2.48E-25    | 92017  |
| CSF3R    | 0.475206 | 2.50E-25    | 1441   |
| FGD5     | 0.475093 | 2.58E-25    | 152273 |
| SIGLEC5  | 0.47501  | 2.63E-25    | 8778   |
| RECQL    | 0.474687 | 2.87E-25    | 5965   |
| FBXL7    | 0.474212 | 3.24E-25    | 23194  |
| GLRB     | 0.474152 | 3.29E-25    | 2743   |
| CLEC4A   | 0.474139 | 3.31E-25    | 50856  |
| CHI3L1   | 0.474053 | 3.38E-25    | 1116   |
| HSPA12B  | 0.473769 | 3.64E-25    | 116835 |
| GNAI2    | 0.473659 | 3.75E-25    | 2771   |
| APLNR    | 0.473653 | 3.75E-25    | 187    |
| FCHSD2   | 0.47358  | 3.82E-25    | 9873   |
| ZNF25    | 0.473381 | 4.03E-25    | 219749 |
| ARID5B   | 0.473245 | 4.17E-25    | 84159  |
| KCNJ5    | 0.473242 | 4.18E-25    | 3762   |
| TNC      | 0.472741 | 4.76E-25    | 3371   |

|          |          |             |        |
|----------|----------|-------------|--------|
| ARMCX2   | 0.472723 | 4.78E-25    | 9823   |
| 1-3月     | 0.472442 | 5.14E-25 NA |        |
| SHISA4   | 0.471989 | 5.78E-25    | 149345 |
| KIAA1755 | 0.471462 | 6.62E-25    | 85449  |
| SPP1     | 0.471261 | 6.98E-25    | 6696   |
| ABCC9    | 0.471242 | 7.01E-25    | 10060  |
| ESAM     | 0.470973 | 7.52E-25    | 90952  |
| SPTA1    | 0.470963 | 7.54E-25    | 6708   |
| VGLL4    | 0.470377 | 8.76E-25    | 9686   |
| KIFC3    | 0.469725 | 1.04E-24    | 3801   |
| WDPCP    | 0.469552 | 1.08E-24    | 51057  |
| ARSB     | 0.469075 | 1.22E-24    | 411    |
| FBLN7    | 0.469067 | 1.23E-24    | 129804 |
| TLR1     | 0.468686 | 1.35E-24    | 7096   |
| SRGN     | 0.468489 | 1.42E-24    | 5552   |
| CCDC71L  | 0.468146 | 1.55E-24    | 168455 |
| RFX8     | 0.468145 | 1.55E-24    | 731220 |
| MAP3K7CL | 0.468132 | 1.56E-24    | 56911  |
| GPR161   | 0.46812  | 1.56E-24    | 23432  |
| FSTL3    | 0.467975 | 1.62E-24    | 10272  |
| C8orf48  | 0.467203 | 1.98E-24    | 157773 |
| HEY1     | 0.467078 | 2.04E-24    | 23462  |
| PACS1    | 0.466638 | 2.28E-24    | 55690  |
| TSHZ3    | 0.466442 | 2.40E-24    | 57616  |
| IDS      | 0.466414 | 2.42E-24    | 3423   |
| SORCS2   | 0.465416 | 3.11E-24    | 57537  |
| USP44    | 0.46534  | 3.17E-24    | 84101  |
| C10orf55 | 0.465307 | 3.20E-24    | 414236 |
| RASAL2   | 0.465245 | 3.25E-24    | 9462   |
| DYRK3    | 0.465175 | 3.31E-24    | 8444   |
| GBP5     | 0.464582 | 3.84E-24    | 115362 |
| PLS3     | 0.464452 | 3.97E-24    | 5358   |
| STAT2    | 0.464389 | 4.04E-24    | 6773   |
| STON1    | 0.464321 | 4.11E-24    | 11037  |
| ATP10D   | 0.464217 | 4.22E-24    | 57205  |
| SLC15A3  | 0.464073 | 4.37E-24    | 51296  |
| PLEKHG2  | 0.464004 | 4.45E-24    | 64857  |
| LRRC25   | 0.463837 | 4.64E-24    | 126364 |
| SYT11    | 0.463615 | 4.91E-24    | 23208  |
| ZPLD1    | 0.463436 | 5.13E-24    | 131368 |
| PABPC5   | 0.463268 | 5.35E-24    | 140886 |
| THEMIS2  | 0.463057 | 5.65E-24    | 9473   |
| NLRP3    | 0.462942 | 5.81E-24    | 114548 |
| SFXN3    | 0.462725 | 6.14E-24    | 81855  |
| CYTH3    | 0.462676 | 6.21E-24    | 9265   |
| LOXHD1   | 0.4626   | 6.33E-24    | 125336 |
| IRAK3    | 0.462587 | 6.35E-24    | 11213  |
| GJB2     | 0.462224 | 6.96E-24    | 2706   |
| TSHZ2    | 0.46214  | 7.11E-24    | 128553 |
| CHST15   | 0.461985 | 7.39E-24    | 51363  |
| PLAU     | 0.461683 | 7.97E-24    | 5328   |
| LIX1L    | 0.460943 | 9.59E-24    | 128077 |
| CD83     | 0.460829 | 9.87E-24    | 9308   |
| ZNF208   | 0.460063 | 1.19E-23    | 7757   |
| HDAC7    | 0.459973 | 1.22E-23    | 51564  |
| PRRX2    | 0.45977  | 1.28E-23    | 51450  |
| CXorf36  | 0.459745 | 1.29E-23 NA |        |
| IL4I1    | 0.459573 | 1.35E-23    | 259307 |
| SERPINE1 | 0.459523 | 1.37E-23    | 5054   |
| RASGRF2  | 0.459197 | 1.48E-23    | 5924   |

|         |          |             |        |
|---------|----------|-------------|--------|
| FAM168A | 0.459126 | 1.51E-23    | 23201  |
| FMO3    | 0.458866 | 1.61E-23    | 2328   |
| ACP5    | 0.458377 | 1.82E-23    | 54     |
| SPI1    | 0.458299 | 1.85E-23    | 6688   |
| IGFBP3  | 0.457939 | 2.02E-23    | 3486   |
| GALNT15 | 0.457523 | 2.24E-23    | 117248 |
| SLC10A6 | 0.457454 | 2.28E-23    | 345274 |
| YPEL4   | 0.457363 | 2.33E-23    | 219539 |
| PDE1B   | 0.457106 | 2.48E-23    | 5153   |
| FST     | 0.456762 | 2.70E-23    | 10468  |
| SLFN11  | 0.456749 | 2.71E-23    | 91607  |
| SEMA7A  | 0.456691 | 2.75E-23    | 8482   |
| ADRBK2  | 0.456471 | 2.91E-23 NA |        |
| NPL     | 0.456419 | 2.94E-23    | 80896  |
| MCTP1   | 0.456405 | 2.95E-23    | 79772  |
| CD276   | 0.456308 | 3.02E-23    | 80381  |
| SPRED3  | 0.45621  | 3.10E-23    | 399473 |
| MCHR1   | 0.45605  | 3.22E-23    | 2847   |
| CRIP2   | 0.455981 | 3.28E-23    | 1397   |
| VMO1    | 0.455665 | 3.54E-23    | 284013 |
| RHOJ    | 0.455407 | 3.77E-23    | 57381  |
| MARCO   | 0.455334 | 3.84E-23    | 8685   |
| ARL13B  | 0.455049 | 4.12E-23    | 200894 |
| AMIGO2  | 0.454991 | 4.18E-23    | 347902 |
| BICD1   | 0.4549   | 4.27E-23    | 636    |
| ZNF267  | 0.454368 | 4.87E-23    | 10308  |
| TRO     | 0.454358 | 4.88E-23    | 7216   |
| HSPG2   | 0.454051 | 5.26E-23    | 3339   |
| BBS9    | 0.45402  | 5.30E-23    | 27241  |
| FAM65A  | 0.453786 | 5.61E-23 NA |        |
| HIC1    | 0.453592 | 5.88E-23    | 3090   |
| CLEC1A  | 0.453484 | 6.04E-23    | 51267  |
| BMP8A   | 0.453464 | 6.07E-23    | 353500 |
| CDH5    | 0.453384 | 6.19E-23    | 1003   |
| WNK3    | 0.453381 | 6.19E-23    | 65267  |
| IGSF6   | 0.453127 | 6.59E-23    | 10261  |
| UACA    | 0.453116 | 6.60E-23    | 55075  |
| FAM228A | 0.452378 | 7.90E-23    | 653140 |
| GIT2    | 0.452309 | 8.03E-23    | 9815   |
| RORA    | 0.452077 | 8.50E-23    | 6095   |
| AMPH    | 0.451892 | 8.89E-23    | 273    |
| ZFP92   | 0.451777 | 9.14E-23    | 139735 |
| EVI2A   | 0.451581 | 9.59E-23    | 2123   |
| PLXND1  | 0.451429 | 9.94E-23    | 23129  |
| SOX7    | 0.450711 | 1.18E-22    | 83595  |
| FOXP3   | 0.450441 | 1.26E-22    | 50943  |
| MURC    | 0.450361 | 1.29E-22 NA |        |
| SAMD4A  | 0.450123 | 1.36E-22    | 23034  |
| CARD8   | 0.449909 | 1.44E-22    | 22900  |
| PCDHGA4 | 0.449872 | 1.45E-22    | 56111  |
| CDYL2   | 0.449756 | 1.49E-22    | 124359 |
| BICD2   | 0.449569 | 1.56E-22    | 23299  |
| PNRC1   | 0.449469 | 1.60E-22    | 10957  |
| RBFOX2  | 0.449325 | 1.65E-22    | 23543  |
| HTR1B   | 0.449323 | 1.65E-22    | 3351   |
| IFI16   | 0.448998 | 1.79E-22    | 3428   |
| RASGRP3 | 0.448938 | 1.81E-22    | 25780  |
| ANO6    | 0.448427 | 2.05E-22    | 196527 |
| RASSF4  | 0.448092 | 2.22E-22    | 83937  |
| GPRC5B  | 0.448065 | 2.23E-22    | 51704  |

|          |          |          |           |
|----------|----------|----------|-----------|
| DLG4     | 0.447778 | 2.39E-22 | 1742      |
| THBD     | 0.447382 | 2.63E-22 | 7056      |
| FGD6     | 0.446953 | 2.91E-22 | 55785     |
| MCEMP1   | 0.446841 | 2.99E-22 | 199675    |
| MFAP5    | 0.446608 | 3.16E-22 | 8076      |
| SIRPA    | 0.446239 | 3.45E-22 | 140885    |
| ANXA1    | 0.446223 | 3.47E-22 | 301       |
| THSD1    | 0.44618  | 3.50E-22 | 55901     |
| HGF      | 0.445682 | 3.94E-22 | 3082      |
| ZNF99    | 0.445524 | 4.09E-22 | 7652      |
| KATNAL1  | 0.445431 | 4.19E-22 | 84056     |
| STARD8   | 0.445346 | 4.27E-22 | 9754      |
| PRPH2    | 0.445288 | 4.33E-22 | 5961      |
| PDGFRA   | 0.445232 | 4.39E-22 | 5156      |
| KCNE1    | 0.445111 | 4.51E-22 | 3753      |
| HSD17B14 | 0.44489  | 4.76E-22 | 51171     |
| TSPAN4   | 0.444789 | 4.87E-22 | 7106      |
| HIF1A    | 0.444645 | 5.04E-22 | 3091      |
| SIGLEC7  | 0.444514 | 5.20E-22 | 27036     |
| ABL2     | 0.444392 | 5.35E-22 | 27        |
| FAM124B  | 0.444243 | 5.54E-22 | 79843     |
| MYO1F    | 0.444211 | 5.59E-22 | 4542      |
| CATSPER1 | 0.443958 | 5.93E-22 | 117144    |
| PBX3     | 0.443851 | 6.08E-22 | 5090      |
| CLEC6A   | 0.443485 | 6.63E-22 | 93978     |
| SIGLEC14 | 0.443364 | 6.82E-22 | 100049587 |
| XIRP1    | 0.443339 | 6.86E-22 | 165904    |
| B4GALNT1 | 0.443011 | 7.41E-22 | 2583      |
| ADAP2    | 0.44251  | 8.34E-22 | 55803     |
| SYNE1    | 0.442273 | 8.82E-22 | 23345     |
| C5AR2    | 0.442232 | 8.91E-22 | 27202     |
| ITPRIPL2 | 0.442065 | 9.26E-22 | 162073    |
| ZNF454   | 0.441867 | 9.70E-22 | 285676    |
| APBB2    | 0.441462 | 1.07E-21 | 323       |
| SCPEP1   | 0.441458 | 1.07E-21 | 59342     |
| SDK1     | 0.441431 | 1.07E-21 | 221935    |
| RECK     | 0.441266 | 1.12E-21 | 8434      |
| LILRB1   | 0.441152 | 1.15E-21 | 10859     |
| TFPI     | 0.441133 | 1.15E-21 | 7035      |
| SESTD1   | 0.441132 | 1.15E-21 | 91404     |
| PHLDB1   | 0.440583 | 1.31E-21 | 23187     |
| TMEM43   | 0.440323 | 1.39E-21 | 79188     |
| C1QTNF1  | 0.439888 | 1.54E-21 | 114897    |
| ANKRD50  | 0.439843 | 1.56E-21 | 57182     |
| OSTM1    | 0.439676 | 1.62E-21 | 28962     |
| ITGA1    | 0.439668 | 1.62E-21 | 3672      |
| DDR2     | 0.439603 | 1.65E-21 | 4921      |
| TMEM47   | 0.439447 | 1.71E-21 | 83604     |
| FNDC3B   | 0.439358 | 1.74E-21 | 64778     |
| PGM2L1   | 0.439272 | 1.78E-21 | 283209    |
| EHD2     | 0.439237 | 1.79E-21 | 30846     |
| C1orf216 | 0.439036 | 1.88E-21 | 127703    |
| CBLB     | 0.438932 | 1.92E-21 | 868       |
| SYNPO2L  | 0.438909 | 1.93E-21 | 79933     |
| FAM151B  | 0.438844 | 1.96E-21 | 167555    |
| TLR6     | 0.438628 | 2.06E-21 | 10333     |
| DEGS1    | 0.438586 | 2.08E-21 | 8560      |
| PREX2    | 0.438499 | 2.13E-21 | 80243     |
| NID1     | 0.438242 | 2.26E-21 | 4811      |
| ASAP1    | 0.437961 | 2.41E-21 | 50807     |

|                |          |          |           |
|----------------|----------|----------|-----------|
| PI4K2A         | 0.437961 | 2.41E-21 | 55361     |
| SELE           | 0.437755 | 2.53E-21 | 6401      |
| S1PR2          | 0.437681 | 2.57E-21 | 9294      |
| SIRPD          | 0.43751  | 2.67E-21 | 128646    |
| RBMS3          | 0.436634 | 3.27E-21 | 27303     |
| EPGN           | 0.436569 | 3.32E-21 | 255324    |
| KIAA0930       | 0.436456 | 3.41E-21 | 23313     |
| SLC39A13       | 0.436289 | 3.55E-21 | 91252     |
| PHLDA3         | 0.436    | 3.79E-21 | 23612     |
| SLC39A6        | 0.435847 | 3.92E-21 | 25800     |
| SNTB2          | 0.435814 | 3.95E-21 | 6645      |
| GNA12          | 0.435603 | 4.15E-21 | 2768      |
| CMYA5          | 0.435285 | 4.46E-21 | 202333    |
| TYROBP         | 0.434965 | 4.80E-21 | 7305      |
| DSTYK          | 0.434963 | 4.81E-21 | 25778     |
| FAM127C        | 0.43463  | 5.19E-21 | NA        |
| TRPV4          | 0.434621 | 5.20E-21 | 59341     |
| FAM110B        | 0.434589 | 5.24E-21 | 90362     |
| KCNK13         | 0.434499 | 5.35E-21 | 56659     |
| TMX3           | 0.434175 | 5.76E-21 | 54495     |
| MSANTD3-TMEFF1 | 0.433967 | 6.04E-21 | 100526694 |
| CARD6          | 0.433937 | 6.08E-21 | 84674     |
| DCHS1          | 0.433794 | 6.28E-21 | 8642      |
| FRMD4A         | 0.433728 | 6.38E-21 | 55691     |
| FGFR1          | 0.433538 | 6.66E-21 | 2260      |
| CSRNP2         | 0.433476 | 6.75E-21 | 81566     |
| CD34           | 0.433401 | 6.87E-21 | 947       |
| AMPD3          | 0.433341 | 6.96E-21 | 272       |
| CETP           | 0.433216 | 7.17E-21 | 1071      |
| TEAD1          | 0.432945 | 7.62E-21 | 7003      |
| C1orf54        | 0.432724 | 8.02E-21 | 79630     |
| GSDMC          | 0.432715 | 8.03E-21 | 56169     |
| EVL            | 0.432505 | 8.42E-21 | 51466     |
| BPGM           | 0.432404 | 8.62E-21 | 669       |
| PCNX           | 0.432297 | 8.83E-21 | NA        |
| LAMB1          | 0.431955 | 9.54E-21 | 3912      |
| PAM            | 0.431952 | 9.55E-21 | 5066      |
| RGS17          | 0.431834 | 9.81E-21 | 26575     |
| PRR34          | 0.431779 | 9.93E-21 | 55267     |
| TNS3           | 0.431634 | 1.03E-20 | 64759     |
| ZNF436         | 0.431633 | 1.03E-20 | 80818     |
| CD300E         | 0.431504 | 1.06E-20 | 342510    |
| MGP            | 0.431416 | 1.08E-20 | 4256      |
| ANGPT4         | 0.4314   | 1.08E-20 | 51378     |
| TBC1D19        | 0.431224 | 1.13E-20 | 55296     |
| MAP4K5         | 0.430179 | 1.43E-20 | 11183     |
| RGS1           | 0.430092 | 1.45E-20 | 5996      |
| MSANTD3        | 0.430052 | 1.47E-20 | 91283     |
| RIC1           | 0.430039 | 1.47E-20 | 57589     |
| KLHL38         | 0.429841 | 1.54E-20 | 340359    |
| ADAMTS9        | 0.429749 | 1.57E-20 | 56999     |
| PRKG1          | 0.429049 | 1.84E-20 | 5592      |
| ADAM17         | 0.42881  | 1.94E-20 | 6868      |
| BOC            | 0.428756 | 1.96E-20 | 91653     |
| PRND           | 0.428725 | 1.98E-20 | 23627     |
| ACSL1          | 0.428707 | 1.99E-20 | 2180      |
| DYSF           | 0.428581 | 2.04E-20 | 8291      |
| PIK3CA         | 0.42832  | 2.17E-20 | 5290      |
| TCEAL3         | 0.428117 | 2.27E-20 | 85012     |
| ENOX1          | 0.427908 | 2.38E-20 | 55068     |

|            |          |             |        |
|------------|----------|-------------|--------|
| GP5        | 0.427789 | 2.44E-20    | 2814   |
| NKIRAS1    | 0.427188 | 2.79E-20    | 28512  |
| OPN1SW     | 0.427094 | 2.85E-20    | 611    |
| HS3ST3B1   | 0.427033 | 2.89E-20    | 9953   |
| CHST14     | 0.426852 | 3.01E-20    | 113189 |
| HOXC8      | 0.426019 | 3.62E-20    | 3224   |
| SH3BP5     | 0.426002 | 3.64E-20    | 9467   |
| NME8       | 0.425717 | 3.87E-20    | 51314  |
| ELOVL4     | 0.425614 | 3.96E-20    | 6785   |
| CDK17      | 0.425007 | 4.53E-20    | 5128   |
| STX2       | 0.425005 | 4.54E-20    | 2054   |
| TRIM6      | 0.425004 | 4.54E-20    | 117854 |
| HECTD2     | 0.424911 | 4.63E-20    | 143279 |
| CYP46A1    | 0.424731 | 4.82E-20    | 10858  |
| PTRF       | 0.424632 | 4.93E-20 NA |        |
| CASC10     | 0.424608 | 4.95E-20 NA |        |
| HIGD1B     | 0.424576 | 4.99E-20    | 51751  |
| TCF23      | 0.424018 | 5.64E-20    | 150921 |
| NUDT10     | 0.42375  | 5.99E-20    | 170685 |
| ENAH       | 0.423727 | 6.02E-20    | 55740  |
| SOCS3      | 0.423725 | 6.02E-20    | 9021   |
| TRPC3      | 0.42359  | 6.20E-20    | 7222   |
| CYYR1      | 0.423133 | 6.86E-20    | 116159 |
| MMD        | 0.422962 | 7.12E-20    | 23531  |
| CCDC184    | 0.422943 | 7.15E-20    | 387856 |
| AF165138.7 | 0.422849 | 7.30E-20 NA |        |
| DOCK10     | 0.422722 | 7.51E-20    | 55619  |
| RDX        | 0.422427 | 8.01E-20    | 5962   |
| TPBG       | 0.422359 | 8.13E-20    | 7162   |
| STX11      | 0.42223  | 8.37E-20    | 8676   |
| ATL3       | 0.42215  | 8.52E-20    | 25923  |
| PRAF2      | 0.422002 | 8.80E-20    | 11230  |
| TBXA2R     | 0.421999 | 8.80E-20    | 6915   |
| ITGA5      | 0.421978 | 8.85E-20    | 3678   |
| TWIST2     | 0.421973 | 8.85E-20    | 117581 |
| EBF3       | 0.421884 | 9.03E-20    | 253738 |
| FMNL1      | 0.421787 | 9.22E-20    | 752    |
| ZFP36L1    | 0.421544 | 9.73E-20    | 677    |
| RANBP3L    | 0.421291 | 1.03E-19    | 202151 |
| TSKS       | 0.421183 | 1.05E-19    | 60385  |
| C7orf60    | 0.42112  | 1.07E-19 NA |        |
| TRIM23     | 0.42112  | 1.07E-19    | 373    |
| TECTA      | 0.421079 | 1.08E-19    | 7007   |
| NPC1       | 0.420949 | 1.11E-19    | 4864   |
| NIN        | 0.420894 | 1.12E-19    | 51199  |
| ZDHHC15    | 0.420797 | 1.15E-19    | 158866 |
| ALOX15B    | 0.420721 | 1.16E-19    | 247    |
| WDR47      | 0.420705 | 1.17E-19    | 22911  |
| DUSP7      | 0.420613 | 1.19E-19    | 1849   |
| FYN        | 0.420531 | 1.21E-19    | 2534   |
| ITGB8      | 0.42036  | 1.26E-19    | 3696   |
| S100A2     | 0.420307 | 1.28E-19    | 6273   |
| MRC1       | 0.420103 | 1.33E-19    | 4360   |
| CSMD2      | 0.419874 | 1.40E-19    | 114784 |
| ADAM19     | 0.419572 | 1.50E-19    | 8728   |
| MMP1       | 0.419485 | 1.53E-19    | 4312   |
| TMCC1      | 0.419414 | 1.55E-19    | 23023  |
| CEP112     | 0.41927  | 1.60E-19    | 201134 |
| FAM167B    | 0.419078 | 1.67E-19    | 84734  |
| HOXC9      | 0.419012 | 1.69E-19    | 3225   |



|          |          |             |        |
|----------|----------|-------------|--------|
| TIAM2    | 0.419    | 1.69E-19    | 26230  |
| TTBK2    | 0.418906 | 1.73E-19    | 146057 |
| RNF24    | 0.418674 | 1.82E-19    | 11237  |
| TGFB2    | 0.418533 | 1.88E-19    | 7042   |
| LRRC17   | 0.418489 | 1.89E-19    | 10234  |
| MARVELD1 | 0.41841  | 1.93E-19    | 83742  |
| ST8SIA2  | 0.418183 | 2.02E-19    | 8128   |
| IFI30    | 0.418095 | 2.06E-19    | 10437  |
| RGS4     | 0.417951 | 2.13E-19    | 5999   |
| SPG20    | 0.417934 | 2.14E-19 NA |        |
| GNS      | 0.417774 | 2.21E-19    | 2799   |
| AIDA     | 0.417727 | 2.23E-19    | 64853  |
| CLEC14A  | 0.417679 | 2.26E-19    | 161198 |
| PPM1F    | 0.417601 | 2.30E-19    | 9647   |
| SEC14L1  | 0.417597 | 2.30E-19    | 6397   |
| FAM198A  | 0.417442 | 2.38E-19 NA |        |
| FTO      | 0.41714  | 2.54E-19    | 79068  |
| MRAP     | 0.417125 | 2.54E-19    | 56246  |
| IGFL3    | 0.417122 | 2.55E-19    | 388555 |
| ZNF438   | 0.417021 | 2.60E-19    | 220929 |
| C4A      | 0.416867 | 2.69E-19    | 720    |
| CLIP1    | 0.416561 | 2.87E-19    | 6249   |
| SEC31A   | 0.416339 | 3.01E-19    | 22872  |
| RBMS2    | 0.416325 | 3.02E-19    | 5939   |
| BEST1    | 0.416304 | 3.04E-19    | 7439   |
| UBE2H    | 0.416301 | 3.04E-19    | 7328   |
| FCAR     | 0.41628  | 3.05E-19    | 2204   |
| PRR29    | 0.416185 | 3.12E-19    | 92340  |
| PIAS3    | 0.416024 | 3.23E-19    | 10401  |
| SAMSN1   | 0.416012 | 3.23E-19    | 64092  |
| FAM196B  | 0.415701 | 3.46E-19 NA |        |
| IGSF21   | 0.415638 | 3.50E-19    | 84966  |
| FIGN     | 0.415235 | 3.82E-19    | 55137  |
| TSPAN9   | 0.415227 | 3.83E-19    | 10867  |
| FGF5     | 0.415191 | 3.86E-19    | 2250   |
| TMTC3    | 0.415028 | 3.99E-19    | 160418 |
| FAM43B   | 0.414601 | 4.38E-19    | 163933 |
| TRIM61   | 0.414479 | 4.49E-19    | 391712 |
| REEP3    | 0.414461 | 4.51E-19    | 221035 |
| PLEK     | 0.414425 | 4.55E-19    | 5341   |
| OSBPL10  | 0.414144 | 4.83E-19    | 114884 |
| PLA1A    | 0.413934 | 5.05E-19    | 51365  |
| CFAP58   | 0.413814 | 5.18E-19    | 159686 |
| CERS5    | 0.413554 | 5.48E-19    | 91012  |
| CD53     | 0.413529 | 5.51E-19    | 963    |
| SWAP70   | 0.413196 | 5.91E-19    | 23075  |
| POLK     | 0.413169 | 5.94E-19    | 51426  |
| NUMBL    | 0.413138 | 5.98E-19    | 9253   |
| FPR2     | 0.413095 | 6.04E-19    | 2358   |
| C12orf54 | 0.413028 | 6.13E-19    | 121273 |
| CCL3     | 0.412839 | 6.38E-19    | 6348   |
| LYST     | 0.41271  | 6.55E-19    | 1130   |
| ADARB1   | 0.412592 | 6.72E-19    | 104    |
| GAB3     | 0.412574 | 6.75E-19    | 139716 |
| SH2D3C   | 0.412408 | 6.99E-19    | 10044  |
| WTIP     | 0.412249 | 7.23E-19    | 126374 |
| PDZD2    | 0.412068 | 7.51E-19    | 23037  |
| SETD7    | 0.412049 | 7.54E-19    | 80854  |
| ARHGEF6  | 0.411997 | 7.63E-19    | 9459   |
| GAL3ST4  | 0.411873 | 7.83E-19    | 79690  |

|          |          |             |        |
|----------|----------|-------------|--------|
| CREB1    | 0.411863 | 7.85E-19    | 1385   |
| CSF1     | 0.411746 | 8.04E-19    | 1435   |
| C11orf96 | 0.411609 | 8.28E-19    | 387763 |
| PICALM   | 0.411366 | 8.72E-19    | 8301   |
| FCRLB    | 0.411216 | 9.00E-19    | 127943 |
| PRKAR1A  | 0.410846 | 9.73E-19    | 5573   |
| PCDHGA9  | 0.410822 | 9.78E-19    | 56107  |
| EMP3     | 0.410769 | 9.89E-19    | 2014   |
| ANXA6    | 0.410657 | 1.01E-18    | 309    |
| RBM43    | 0.41059  | 1.03E-18    | 375287 |
| ZC2HC1A  | 0.410312 | 1.09E-18    | 51101  |
| MYOZ3    | 0.410208 | 1.11E-18    | 91977  |
| LSAMP    | 0.41012  | 1.13E-18    | 4045   |
| TNFSF14  | 0.409573 | 1.27E-18    | 8740   |
| TLR8     | 0.409533 | 1.28E-18    | 51311  |
| CD226    | 0.409204 | 1.38E-18    | 10666  |
| MYCT1    | 0.409041 | 1.42E-18    | 80177  |
| CCL4     | 0.409028 | 1.43E-18    | 6351   |
| BACH1    | 0.409007 | 1.43E-18    | 571    |
| FYB      | 0.409003 | 1.44E-18 NA |        |
| RBPJ     | 0.408867 | 1.48E-18    | 3516   |
| SAMHD1   | 0.408509 | 1.59E-18    | 25939  |
| RIMKLB   | 0.408488 | 1.60E-18    | 57494  |
| MMRN2    | 0.408234 | 1.69E-18    | 79812  |
| ROR2     | 0.408154 | 1.72E-18    | 4920   |
| WDR91    | 0.408058 | 1.75E-18    | 29062  |
| ARHGAP1  | 0.407986 | 1.78E-18    | 392    |
| NFYB     | 0.407926 | 1.80E-18    | 4801   |
| MAP7D1   | 0.407657 | 1.90E-18    | 55700  |
| EFR3A    | 0.407565 | 1.94E-18    | 23167  |
| BNC1     | 0.407121 | 2.13E-18    | 646    |
| ECSCR    | 0.407058 | 2.16E-18    | 641700 |
| INPP4B   | 0.407012 | 2.18E-18    | 8821   |
| FGF10    | 0.406969 | 2.20E-18    | 2255   |
| C1orf198 | 0.406729 | 2.31E-18    | 84886  |
| TAOK1    | 0.406726 | 2.31E-18    | 57551  |
| ABHD2    | 0.406688 | 2.33E-18    | 11057  |
| BPI      | 0.406664 | 2.34E-18    | 671    |
| PARVG    | 0.406569 | 2.39E-18    | 64098  |
| NLGN4Y   | 0.406501 | 2.42E-18    | 22829  |
| ATP8B4   | 0.406401 | 2.47E-18    | 79895  |
| PRKCDBP  | 0.40638  | 2.48E-18 NA |        |
| TNKS2    | 0.406261 | 2.55E-18    | 80351  |
| CD300LF  | 0.406257 | 2.55E-18    | 146722 |
| IL1RN    | 0.40578  | 2.82E-18    | 3557   |
| ZFP1     | 0.405753 | 2.83E-18    | 162239 |
| ROBO4    | 0.405734 | 2.84E-18    | 54538  |
| HOMER3   | 0.405696 | 2.87E-18    | 9454   |
| COL14A1  | 0.405353 | 3.08E-18    | 7373   |
| GNG11    | 0.405141 | 3.22E-18    | 2791   |
| MR1      | 0.405117 | 3.23E-18    | 3140   |
| SPIN1    | 0.404721 | 3.51E-18    | 10927  |
| SIGLEC10 | 0.404601 | 3.60E-18    | 89790  |
| GREB1    | 0.404523 | 3.65E-18    | 9687   |
| MMP13    | 0.403997 | 4.07E-18    | 4322   |
| TXNDC15  | 0.403977 | 4.09E-18    | 79770  |
| RUFY2    | 0.403956 | 4.11E-18    | 55680  |
| EGFL6    | 0.40391  | 4.15E-18    | 25975  |
| CD163    | 0.403741 | 4.30E-18    | 9332   |
| GAS7     | 0.403486 | 4.53E-18    | 8522   |

|            |          |             |        |
|------------|----------|-------------|--------|
| EXTL2      | 0.403336 | 4.67E-18    | 2135   |
| PIK3R6     | 0.403216 | 4.79E-18    | 146850 |
| CREM       | 0.403104 | 4.90E-18    | 1390   |
| NPR2       | 0.403089 | 4.91E-18    | 4882   |
| CYTL1      | 0.402894 | 5.12E-18    | 54360  |
| ABCA6      | 0.402697 | 5.33E-18    | 23460  |
| IFNAR2     | 0.402387 | 5.68E-18    | 3455   |
| ZBTB47     | 0.402277 | 5.81E-18    | 92999  |
| BBX        | 0.40226  | 5.83E-18    | 56987  |
| EIF5A2     | 0.402192 | 5.91E-18    | 56648  |
| S1PR1      | 0.402124 | 5.99E-18    | 1901   |
| CNN3       | 0.401997 | 6.15E-18    | 1266   |
| CSRP2      | 0.401957 | 6.20E-18    | 1466   |
| SOX4       | 0.401876 | 6.31E-18    | 6659   |
| ELOVL5     | 0.401722 | 6.51E-18    | 60481  |
| EVA1B      | 0.401667 | 6.58E-18    | 55194  |
| GLIS1      | 0.401662 | 6.59E-18    | 148979 |
| RARRES2    | 0.401551 | 6.74E-18    | 5919   |
| STYX       | 0.401084 | 7.42E-18    | 6815   |
| ZNF677     | 0.401075 | 7.43E-18    | 342926 |
| CA5B       | 0.400815 | 7.84E-18    | 11238  |
| MICU3      | 0.400687 | 8.04E-18    | 286097 |
| GATA3      | 0.400636 | 8.13E-18    | 2625   |
| CSGALNACT1 | 0.400244 | 8.80E-18    | 55790  |
| CAV2       | 0.400136 | 9.00E-18    | 858    |
| PALM2      | 0.400055 | 9.15E-18 NA |        |
| ZMAT3      | 0.39996  | 9.33E-18    | 64393  |
| PDLIM5     | 0.399936 | 9.37E-18    | 10611  |
| DNAJC24    | 0.399496 | 1.03E-17    | 120526 |
| MS4A7      | 0.399373 | 1.05E-17    | 58475  |
| HOXC5      | 0.399364 | 1.05E-17    | 3222   |
| RNF146     | 0.399313 | 1.06E-17    | 81847  |
| RPS6KA2    | 0.399159 | 1.10E-17    | 6196   |
| PAPSS1     | 0.399147 | 1.10E-17    | 9061   |
| ABI2       | 0.398942 | 1.15E-17    | 10152  |
| DCUN1D3    | 0.398912 | 1.15E-17    | 123879 |
| ZHX2       | 0.398883 | 1.16E-17    | 22882  |
| ZEB1       | 0.398631 | 1.22E-17    | 6935   |
| LTBP3      | 0.398479 | 1.26E-17    | 4054   |
| BCL9L      | 0.398476 | 1.26E-17    | 283149 |
| CD300A     | 0.398307 | 1.31E-17    | 11314  |
| TBC1D2B    | 0.398288 | 1.31E-17    | 23102  |
| WWC3       | 0.398056 | 1.37E-17    | 55841  |
| DNAL1      | 0.39802  | 1.38E-17    | 83544  |
| CEACAM4    | 0.397947 | 1.40E-17    | 1089   |
| ANKRD44    | 0.397758 | 1.46E-17    | 91526  |
| SEC14L2    | 0.397625 | 1.50E-17    | 23541  |
| PTPLAD2    | 0.397607 | 1.50E-17 NA |        |
| GXYLT2     | 0.397549 | 1.52E-17    | 727936 |
| PIK3R5     | 0.397337 | 1.59E-17    | 23533  |
| TNFRSF4    | 0.397324 | 1.59E-17    | 7293   |
| MAGEH1     | 0.397275 | 1.61E-17    | 28986  |
| FBLN5      | 0.397245 | 1.62E-17    | 10516  |
| NHSL2      | 0.397067 | 1.68E-17    | 340527 |
| CNRIP1     | 0.39698  | 1.71E-17    | 25927  |
| SLC38A2    | 0.396979 | 1.71E-17    | 54407  |
| MBNL2      | 0.396536 | 1.87E-17    | 10150  |
| EMCN       | 0.396252 | 1.98E-17    | 51705  |
| CLIP4      | 0.39613  | 2.03E-17    | 79745  |
| GADD45B    | 0.396024 | 2.07E-17    | 4616   |

|          |          |          |           |
|----------|----------|----------|-----------|
| DOK3     | 0.395921 | 2.11E-17 | 79930     |
| LRP1     | 0.395879 | 2.13E-17 | 4035      |
| TRAPPC3L | 0.395776 | 2.18E-17 | 100128327 |
| ZCCHC18  | 0.395676 | 2.22E-17 | 644353    |
| KIAA1217 | 0.395568 | 2.27E-17 | 56243     |
| IGF1     | 0.395545 | 2.28E-17 | 3479      |
| IRS1     | 0.395396 | 2.35E-17 | 3667      |
| FAM49A   | 0.394929 | 2.58E-17 | NA        |
| TRAM1    | 0.394925 | 2.58E-17 | 23471     |
| PIK3IP1  | 0.39489  | 2.60E-17 | 113791    |
| FYTTD1   | 0.394876 | 2.61E-17 | 84248     |
| LRRK2    | 0.394756 | 2.67E-17 | 120892    |
| SKI      | 0.394702 | 2.70E-17 | 6497      |
| GULP1    | 0.394241 | 2.96E-17 | 51454     |
| PARP8    | 0.394105 | 3.04E-17 | 79668     |
| PLOD1    | 0.393842 | 3.21E-17 | 5351      |
| ZNF512B  | 0.393841 | 3.21E-17 | 57473     |
| PRCP     | 0.393537 | 3.41E-17 | 5547      |
| FAM114A2 | 0.393512 | 3.42E-17 | 10827     |
| PTCH2    | 0.393277 | 3.59E-17 | 8643      |
| ARID4B   | 0.39326  | 3.60E-17 | 51742     |
| F2RL3    | 0.393225 | 3.62E-17 | 9002      |
| KLHL28   | 0.393037 | 3.76E-17 | 54813     |
| MYO9B    | 0.392999 | 3.79E-17 | 4650      |
| ATF7IP   | 0.392953 | 3.83E-17 | 55729     |
| TANC2    | 0.39292  | 3.85E-17 | 26115     |
| PSAP     | 0.392838 | 3.92E-17 | 5660      |
| MIB1     | 0.39282  | 3.93E-17 | 57534     |
| CCDC50   | 0.392759 | 3.98E-17 | 152137    |
| COL25A1  | 0.392758 | 3.98E-17 | 84570     |
| NUDT3    | 0.39244  | 4.24E-17 | 11165     |
| FAM229B  | 0.392343 | 4.32E-17 | 619208    |
| ACTN1    | 0.39221  | 4.44E-17 | 87        |
| LRP12    | 0.392166 | 4.47E-17 | 29967     |
| PAPOLG   | 0.392119 | 4.52E-17 | 64895     |
| DNAJB4   | 0.392114 | 4.52E-17 | 11080     |
| INMT     | 0.391821 | 4.79E-17 | 11185     |
| B3GALNT1 | 0.391791 | 4.82E-17 | 8706      |
| KCTD20   | 0.391726 | 4.88E-17 | 222658    |
| CCR5     | 0.39165  | 4.96E-17 | 1234      |
| TRIM46   | 0.391617 | 4.99E-17 | 80128     |
| PHTF1    | 0.391396 | 5.21E-17 | 10745     |
| WDR86    | 0.39127  | 5.34E-17 | 349136    |
| ITIH3    | 0.391091 | 5.54E-17 | 3699      |
| IL5      | 0.391046 | 5.59E-17 | 3567      |
| KCTD11   | 0.390863 | 5.79E-17 | 147040    |
| DYNC2H1  | 0.390693 | 5.99E-17 | 79659     |
| DCLK3    | 0.390599 | 6.10E-17 | 85443     |
| ARRDC3   | 0.390209 | 6.59E-17 | 57561     |
| SLC22A16 | 0.390134 | 6.69E-17 | 85413     |
| NAGK     | 0.390104 | 6.73E-17 | 55577     |
| CABYR    | 0.389982 | 6.89E-17 | 26256     |
| PPFIBP1  | 0.389907 | 7.00E-17 | 8496      |
| CFAP54   | 0.389858 | 7.06E-17 | 144535    |
| AMOTL2   | 0.389826 | 7.11E-17 | 51421     |
| RIT1     | 0.389731 | 7.24E-17 | 6016      |
| HPS5     | 0.389547 | 7.51E-17 | 11234     |
| HIPK3    | 0.389337 | 7.82E-17 | 10114     |
| SLC4A7   | 0.3892   | 8.04E-17 | 9497      |
| TEK      | 0.389127 | 8.16E-17 | 7010      |

|          |          |             |        |
|----------|----------|-------------|--------|
| DENND2C  | 0.389109 | 8.18E-17    | 163259 |
| GPR78    | 0.388995 | 8.37E-17    | 27201  |
| MAML2    | 0.388797 | 8.70E-17    | 84441  |
| AKAP12   | 0.388682 | 8.90E-17    | 9590   |
| EIF2AK2  | 0.38865  | 8.95E-17    | 5610   |
| SEN7     | 0.388526 | 9.18E-17    | 57337  |
| RASSF2   | 0.388447 | 9.32E-17    | 9770   |
| RIN2     | 0.388428 | 9.35E-17    | 54453  |
| PLA2G15  | 0.38842  | 9.37E-17    | 23659  |
| NGF      | 0.388405 | 9.40E-17    | 4803   |
| ZNF697   | 0.388399 | 9.41E-17    | 90874  |
| ARHGAP28 | 0.388074 | 1.00E-16    | 79822  |
| 7-9月     | 0.387917 | 1.03E-16 NA |        |
| TMEM132A | 0.387842 | 1.05E-16    | 54972  |
| C11orf87 | 0.387555 | 1.11E-16    | 399947 |
| GADL1    | 0.387417 | 1.14E-16    | 339896 |
| UVRAG    | 0.387358 | 1.15E-16    | 7405   |
| EXOC5    | 0.387264 | 1.17E-16    | 10640  |
| PHYHIP   | 0.387243 | 1.18E-16    | 9796   |
| ADAM23   | 0.387222 | 1.18E-16    | 8745   |
| IGFL2    | 0.386663 | 1.32E-16    | 147920 |
| SERPINB9 | 0.386605 | 1.34E-16    | 5272   |
| GRID1    | 0.386269 | 1.43E-16    | 2894   |
| SLC41A1  | 0.38624  | 1.43E-16    | 254428 |
| VAT1     | 0.385869 | 1.54E-16    | 10493  |
| ANGPT1   | 0.385849 | 1.55E-16    | 284    |
| DNM3     | 0.385829 | 1.55E-16    | 26052  |
| PLD3     | 0.385801 | 1.56E-16    | 23646  |
| BNIP2    | 0.385793 | 1.56E-16    | 663    |
| PPM1M    | 0.385633 | 1.61E-16    | 132160 |
| PMEPA1   | 0.385443 | 1.67E-16    | 56937  |
| PODXL    | 0.385306 | 1.72E-16    | 5420   |
| INPP5F   | 0.385304 | 1.72E-16    | 22876  |
| ADCY4    | 0.385169 | 1.77E-16    | 196883 |
| TRIM8    | 0.385151 | 1.77E-16    | 81603  |
| SPINK7   | 0.385084 | 1.79E-16    | 84651  |
| IKZF2    | 0.38482  | 1.89E-16    | 22807  |
| MBD5     | 0.384795 | 1.90E-16    | 55777  |
| VWF      | 0.384643 | 1.95E-16    | 7450   |
| ZBTB41   | 0.384567 | 1.98E-16    | 360023 |
| SACS     | 0.384562 | 1.99E-16    | 26278  |
| KRT79    | 0.384239 | 2.11E-16    | 338785 |
| LRCH3    | 0.383953 | 2.23E-16    | 84859  |
| YAF2     | 0.383803 | 2.30E-16    | 10138  |
| CLMP     | 0.383802 | 2.30E-16    | 79827  |
| ZBTB46   | 0.383729 | 2.33E-16    | 140685 |
| FCN3     | 0.3837   | 2.35E-16    | 8547   |
| ATM      | 0.383677 | 2.36E-16    | 472    |
| REL      | 0.383636 | 2.37E-16    | 5966   |
| KIAA1033 | 0.383588 | 2.40E-16 NA |        |
| IGFBP4   | 0.383567 | 2.41E-16    | 3487   |
| REM1     | 0.38355  | 2.41E-16    | 28954  |
| FRY      | 0.383443 | 2.46E-16    | 10129  |
| HLX      | 0.383325 | 2.52E-16    | 3142   |
| PHF21A   | 0.383312 | 2.53E-16    | 51317  |
| EBF1     | 0.383266 | 2.55E-16    | 1879   |
| IMPG2    | 0.383222 | 2.57E-16    | 50939  |
| ROCK1    | 0.383219 | 2.57E-16    | 6093   |
| ADIPOQ   | 0.383115 | 2.63E-16    | 9370   |
| DIP2C    | 0.38302  | 2.67E-16    | 22982  |

|           |          |             |        |
|-----------|----------|-------------|--------|
| AHR       | 0.38295  | 2.71E-16    | 196    |
| PRKCH     | 0.382901 | 2.74E-16    | 5583   |
| PHF20L1   | 0.38285  | 2.76E-16    | 51105  |
| CBL       | 0.382792 | 2.79E-16    | 867    |
| DDHD1     | 0.382736 | 2.82E-16    | 80821  |
| LST1      | 0.382658 | 2.87E-16    | 7940   |
| RGS7BP    | 0.382419 | 3.00E-16    | 401190 |
| NR2F2     | 0.382377 | 3.03E-16    | 7026   |
| PCNXL4    | 0.382265 | 3.09E-16 NA |        |
| OGFRL1    | 0.38204  | 3.23E-16    | 79627  |
| VKORC1    | 0.381832 | 3.36E-16    | 79001  |
| ZNF720    | 0.381825 | 3.36E-16    | 124411 |
| ENTPD7    | 0.381754 | 3.41E-16    | 57089  |
| TMPRSS11D | 0.381569 | 3.53E-16    | 9407   |
| WDFY3     | 0.381435 | 3.62E-16    | 23001  |
| RCBTB2    | 0.381302 | 3.72E-16    | 1102   |
| RAMP2     | 0.38123  | 3.77E-16    | 10266  |
| ACAD11    | 0.381205 | 3.79E-16    | 84129  |
| ELK4      | 0.3811   | 3.86E-16    | 2005   |
| SELPLG    | 0.381003 | 3.94E-16    | 6404   |
| ARHGAP24  | 0.38073  | 4.15E-16    | 83478  |
| HCK       | 0.380633 | 4.22E-16    | 3055   |
| RILPL2    | 0.380587 | 4.26E-16    | 196383 |
| FLI1      | 0.380516 | 4.32E-16    | 2313   |
| DKK2      | 0.380397 | 4.42E-16    | 27123  |
| CILP      | 0.380368 | 4.44E-16    | 8483   |
| MCFD2     | 0.380357 | 4.45E-16    | 90411  |
| SLC35B4   | 0.380331 | 4.47E-16    | 84912  |
| PTGFR     | 0.380247 | 4.55E-16    | 5737   |
| GRK4      | 0.380188 | 4.60E-16    | 2868   |
| SCHIP1    | 0.380132 | 4.65E-16    | 29970  |
| STOM      | 0.380049 | 4.72E-16    | 2040   |
| JMJD1C    | 0.379845 | 4.91E-16    | 221037 |
| C20orf194 | 0.379809 | 4.94E-16    | 25943  |
| TMEM110   | 0.379801 | 4.95E-16 NA |        |
| MTMR9     | 0.379463 | 5.28E-16    | 66036  |
| ZNF366    | 0.379435 | 5.31E-16    | 167465 |
| CYLD      | 0.379405 | 5.34E-16    | 1540   |
| SDCCAG8   | 0.379373 | 5.37E-16    | 10806  |
| SEMA5B    | 0.379356 | 5.39E-16    | 54437  |
| WBP1L     | 0.379332 | 5.41E-16    | 54838  |
| PINLYP    | 0.379306 | 5.44E-16    | 390940 |
| VPS13B    | 0.379267 | 5.48E-16    | 157680 |
| RHOBTB1   | 0.379123 | 5.63E-16    | 9886   |
| CCNJ      | 0.379001 | 5.76E-16    | 54619  |
| PPT1      | 0.378537 | 6.29E-16    | 5538   |
| IKZF4     | 0.37836  | 6.51E-16    | 64375  |
| C16orf52  | 0.378296 | 6.59E-16 NA |        |
| EFNB3     | 0.378157 | 6.76E-16    | 1949   |
| SASH1     | 0.378003 | 6.96E-16    | 23328  |
| CACNA2D1  | 0.377791 | 7.25E-16    | 781    |
| ZNF641    | 0.377703 | 7.37E-16    | 121274 |
| ST8SIA4   | 0.377388 | 7.82E-16    | 7903   |
| PEAK1     | 0.377365 | 7.85E-16    | 79834  |
| P2RY6     | 0.377273 | 7.99E-16    | 5031   |
| ZNF333    | 0.37726  | 8.01E-16    | 84449  |
| SLC2A6    | 0.377242 | 8.04E-16    | 11182  |
| RNF217    | 0.377077 | 8.29E-16    | 154214 |
| SYT16     | 0.3769   | 8.57E-16    | 83851  |
| MAP4      | 0.376875 | 8.61E-16    | 4134   |

|          |          |          |           |
|----------|----------|----------|-----------|
| LAMA2    | 0.376671 | 8.95E-16 | 3908      |
| KYNU     | 0.376625 | 9.03E-16 | 8942      |
| PTPRG    | 0.376354 | 9.50E-16 | 5793      |
| IL21R    | 0.376299 | 9.60E-16 | 50615     |
| ADAM8    | 0.376252 | 9.69E-16 | 101       |
| SLC30A7  | 0.376244 | 9.70E-16 | 148867    |
| KCNK2    | 0.37623  | 9.73E-16 | 3776      |
| NFKB2    | 0.376166 | 9.84E-16 | 4791      |
| PQLC3    | 0.37581  | 1.05E-15 | NA        |
| GPR97    | 0.375453 | 1.13E-15 | NA        |
| ZNF362   | 0.375429 | 1.13E-15 | 149076    |
| IL2RA    | 0.375421 | 1.13E-15 | 3559      |
| CD33     | 0.37538  | 1.14E-15 | 945       |
| SCEL     | 0.375375 | 1.14E-15 | 8796      |
| RAB23    | 0.375333 | 1.15E-15 | 51715     |
| SLFN12L  | 0.375196 | 1.18E-15 | 100506736 |
| MKL1     | 0.375134 | 1.19E-15 | NA        |
| CYTH4    | 0.375132 | 1.19E-15 | 27128     |
| SAR1A    | 0.37503  | 1.22E-15 | 56681     |
| CD300LB  | 0.374851 | 1.26E-15 | 124599    |
| ITGA4    | 0.374481 | 1.35E-15 | 3676      |
| TRIM22   | 0.374479 | 1.35E-15 | 10346     |
| MFAP3    | 0.374436 | 1.36E-15 | 4238      |
| ZNF135   | 0.374345 | 1.38E-15 | 7694      |
| STEAP2   | 0.374122 | 1.44E-15 | 261729    |
| S100PBP  | 0.373887 | 1.51E-15 | 64766     |
| ALS2CR12 | 0.373808 | 1.53E-15 | NA        |
| RILPL1   | 0.373713 | 1.56E-15 | 353116    |
| NABP1    | 0.373565 | 1.60E-15 | 64859     |
| ACAN     | 0.373461 | 1.63E-15 | 176       |
| TET1     | 0.373421 | 1.64E-15 | 80312     |
| GIPC3    | 0.373383 | 1.66E-15 | 126326    |
| NLGN4X   | 0.37338  | 1.66E-15 | 57502     |
| KLRG1    | 0.373292 | 1.68E-15 | 10219     |
| GPR132   | 0.373258 | 1.70E-15 | 29933     |
| TRPC6    | 0.373202 | 1.71E-15 | 7225      |
| AGPAT4   | 0.373084 | 1.75E-15 | 56895     |
| CCDC176  | 0.373008 | 1.78E-15 | NA        |
| FMOD     | 0.372936 | 1.80E-15 | 2331      |
| ZBED2    | 0.372817 | 1.84E-15 | 79413     |
| MOB1B    | 0.372594 | 1.92E-15 | 92597     |
| SAMD8    | 0.372466 | 1.96E-15 | 142891    |
| WDFY2    | 0.371997 | 2.14E-15 | 115825    |
| TBX15    | 0.371978 | 2.15E-15 | 6913      |
| ZBTB8A   | 0.371976 | 2.15E-15 | 653121    |
| REST     | 0.371889 | 2.19E-15 | 5978      |
| ZNF732   | 0.371864 | 2.20E-15 | 654254    |
| PLEKHG1  | 0.371757 | 2.24E-15 | 57480     |
| KPNA5    | 0.371515 | 2.34E-15 | 3841      |
| SLC45A1  | 0.371286 | 2.44E-15 | 50651     |
| ARHGAP23 | 0.371223 | 2.47E-15 | 57636     |
| CCSER2   | 0.371223 | 2.47E-15 | 54462     |
| CEP135   | 0.371174 | 2.49E-15 | 9662      |
| IL6ST    | 0.371145 | 2.51E-15 | 3572      |
| BTF3L4   | 0.371091 | 2.53E-15 | 91408     |
| SLC6A6   | 0.371065 | 2.55E-15 | 6533      |
| CCL18    | 0.371054 | 2.55E-15 | 6362      |
| CREBRF   | 0.370687 | 2.73E-15 | 153222    |
| LY86     | 0.37044  | 2.86E-15 | 9450      |
| ZNF750   | 0.370419 | 2.87E-15 | 79755     |

|            |          |             |           |
|------------|----------|-------------|-----------|
| ZBTB1      | 0.37038  | 2.89E-15    | 22890     |
| ATF7       | 0.370245 | 2.96E-15    | 11016     |
| ST3GAL2    | 0.370184 | 2.99E-15    | 6483      |
| RNF222     | 0.370075 | 3.06E-15    | 643904    |
| CEP162     | 0.369934 | 3.14E-15    | 22832     |
| ECM1       | 0.369815 | 3.20E-15    | 1893      |
| CREB5      | 0.369789 | 3.22E-15    | 9586      |
| ARHGEF3    | 0.369723 | 3.26E-15    | 50650     |
| RNF169     | 0.369616 | 3.32E-15    | 254225    |
| RAP2B      | 0.369568 | 3.35E-15    | 5912      |
| BNIP3L     | 0.369504 | 3.39E-15    | 665       |
| MEGF6      | 0.369492 | 3.40E-15    | 1953      |
| STXBP4     | 0.369473 | 3.41E-15    | 252983    |
| ZCCHC24    | 0.369466 | 3.42E-15    | 219654    |
| DUSP10     | 0.369447 | 3.43E-15    | 11221     |
| SH2B3      | 0.369423 | 3.44E-15    | 10019     |
| PLK3       | 0.369286 | 3.53E-15    | 1263      |
| MPP4       | 0.368803 | 3.86E-15    | 58538     |
| ZC3H10     | 0.368714 | 3.92E-15    | 84872     |
| AMOTL1     | 0.368666 | 3.96E-15    | 154810    |
| OTUD4      | 0.368572 | 4.03E-15    | 54726     |
| BBIP1      | 0.368501 | 4.08E-15    | 92482     |
| EXOC3L2    | 0.368484 | 4.09E-15    | 90332     |
| RASA1      | 0.368309 | 4.22E-15    | 5921      |
| NOVA2      | 0.368228 | 4.29E-15    | 4858      |
| ISLR2      | 0.368213 | 4.30E-15    | 57611     |
| GPR182     | 0.368192 | 4.32E-15    | 11318     |
| LRRC70     | 0.368138 | 4.36E-15    | 100130733 |
| SPRY1      | 0.367681 | 4.74E-15    | 10252     |
| GPATCH2L   | 0.367619 | 4.79E-15    | 55668     |
| FAM155A    | 0.367446 | 4.94E-15    | 728215    |
| UBE2W      | 0.367292 | 5.09E-15    | 55284     |
| ELL2       | 0.367206 | 5.17E-15    | 22936     |
| PIK3AP1    | 0.367024 | 5.34E-15    | 118788    |
| NEK1       | 0.366917 | 5.44E-15    | 4750      |
| LRRC38     | 0.366863 | 5.50E-15    | 126755    |
| LAMC2      | 0.366768 | 5.59E-15    | 3918      |
| LEPROT     | 0.366742 | 5.62E-15    | 54741     |
| ALCAM      | 0.366641 | 5.73E-15    | 214       |
| OXTR       | 0.366628 | 5.74E-15    | 5021      |
| MFSD1      | 0.366465 | 5.91E-15    | 64747     |
| ACSL4      | 0.36629  | 6.10E-15    | 2182      |
| GNB5       | 0.366267 | 6.13E-15    | 10681     |
| AGO3       | 0.366116 | 6.30E-15    | 192669    |
| PRDM6      | 0.366077 | 6.34E-15    | 93166     |
| IRAK2      | 0.365944 | 6.50E-15    | 3656      |
| PLEKHA3    | 0.365882 | 6.57E-15    | 65977     |
| GABARAPL1  | 0.365862 | 6.60E-15    | 23710     |
| LBP        | 0.365844 | 6.62E-15    | 3929      |
| COL13A1    | 0.365807 | 6.66E-15    | 1305      |
| COLGALT1   | 0.36576  | 6.72E-15    | 79709     |
| FAM178A    | 0.365728 | 6.76E-15 NA |           |
| PCDH9      | 0.365605 | 6.91E-15    | 5101      |
| HDGFRP3    | 0.365557 | 6.97E-15 NA |           |
| FKBP15     | 0.365532 | 7.00E-15    | 23307     |
| IFIT5      | 0.36553  | 7.00E-15    | 24138     |
| RIPK2      | 0.365165 | 7.48E-15    | 8767      |
| AC037459.4 | 0.365151 | 7.50E-15 NA |           |
| TGFBR2     | 0.36512  | 7.54E-15    | 7048      |
| SUFU       | 0.365091 | 7.58E-15    | 51684     |



|          |          |          |           |
|----------|----------|----------|-----------|
| PPAPDC3  | 0.364923 | 7.82E-15 | NA        |
| SNX31    | 0.364911 | 7.83E-15 | 169166    |
| RC3H2    | 0.364888 | 7.87E-15 | 54542     |
| C5orf51  | 0.364691 | 8.15E-15 | 285636    |
| UBXN7    | 0.364587 | 8.31E-15 | 26043     |
| VAMP4    | 0.364564 | 8.34E-15 | 8674      |
| FAM219A  | 0.364531 | 8.39E-15 | 203259    |
| MAP3K7   | 0.364476 | 8.47E-15 | 6885      |
| PYGO1    | 0.364432 | 8.54E-15 | 26108     |
| BBS10    | 0.364421 | 8.56E-15 | 79738     |
| ZNF484   | 0.364344 | 8.68E-15 | 83744     |
| TRAM2    | 0.364233 | 8.85E-15 | 9697      |
| RAB13    | 0.364097 | 9.07E-15 | 5872      |
| COL6A6   | 0.364039 | 9.17E-15 | 131873    |
| CLTCL1   | 0.363998 | 9.24E-15 | 8218      |
| SP110    | 0.363958 | 9.30E-15 | 3431      |
| TMEM30A  | 0.363945 | 9.33E-15 | 55754     |
| PREX1    | 0.363824 | 9.53E-15 | 57580     |
| WNK1     | 0.363505 | 1.01E-14 | 65125     |
| C2orf74  | 0.363483 | 1.01E-14 | 339804    |
| ZFHX3    | 0.363438 | 1.02E-14 | 463       |
| NR3C1    | 0.363359 | 1.04E-14 | 2908      |
| ZNF382   | 0.363303 | 1.05E-14 | 84911     |
| SGMS2    | 0.363294 | 1.05E-14 | 166929    |
| C21orf91 | 0.363241 | 1.06E-14 | 54149     |
| C15orf53 | 0.363181 | 1.07E-14 | NA        |
| JAM3     | 0.363052 | 1.10E-14 | 83700     |
| PLAUR    | 0.362948 | 1.12E-14 | 5329      |
| STX7     | 0.362925 | 1.12E-14 | 8417      |
| MMP21    | 0.362887 | 1.13E-14 | 118856    |
| RAB12    | 0.362861 | 1.13E-14 | 201475    |
| MYADM    | 0.362857 | 1.13E-14 | 91663     |
| AP1S2    | 0.362777 | 1.15E-14 | 8905      |
| LATS1    | 0.362759 | 1.15E-14 | 9113      |
| PURA     | 0.362736 | 1.16E-14 | 5813      |
| TSPYL5   | 0.362666 | 1.17E-14 | 85453     |
| ZNF626   | 0.362648 | 1.18E-14 | 199777    |
| CNN2     | 0.362554 | 1.20E-14 | 1265      |
| STK3     | 0.362538 | 1.20E-14 | 6788      |
| GGCX     | 0.36253  | 1.20E-14 | 2677      |
| KANSL1L  | 0.362492 | 1.21E-14 | 151050    |
| CXorf21  | 0.362343 | 1.24E-14 | NA        |
| DISC1    | 0.362323 | 1.25E-14 | 27185     |
| MSANTD4  | 0.36226  | 1.26E-14 | 84437     |
| ETV1     | 0.362251 | 1.26E-14 | 2115      |
| PRDM2    | 0.362136 | 1.29E-14 | 7799      |
| IQSEC1   | 0.362096 | 1.30E-14 | 9922      |
| TRIM5    | 0.362061 | 1.31E-14 | 85363     |
| FAT4     | 0.362024 | 1.32E-14 | 79633     |
| RNF115   | 0.36198  | 1.33E-14 | 27246     |
| PFKFB3   | 0.361964 | 1.33E-14 | 5209      |
| PITPNC1  | 0.361776 | 1.38E-14 | 26207     |
| TSPYL4   | 0.361721 | 1.39E-14 | 23270     |
| TTC7B    | 0.361683 | 1.40E-14 | 145567    |
| ARIH1    | 0.361668 | 1.40E-14 | 25820     |
| NBPF19   | 0.361557 | 1.43E-14 | 101060226 |
| NCKAP1L  | 0.361481 | 1.45E-14 | 3071      |
| NBPF26   | 0.361452 | 1.46E-14 | 101060684 |
| ANXA8    | 0.361338 | 1.49E-14 | 653145    |
| GIMAP4   | 0.361261 | 1.51E-14 | 55303     |

|           |          |             |        |
|-----------|----------|-------------|--------|
| MAP3K8    | 0.36106  | 1.56E-14    | 1326   |
| ZNF322    | 0.360922 | 1.60E-14    | 79692  |
| PHF14     | 0.360874 | 1.62E-14    | 9678   |
| ELFN1     | 0.360871 | 1.62E-14    | 392617 |
| TMEM263   | 0.36087  | 1.62E-14    | 90488  |
| CLDN11    | 0.360822 | 1.63E-14    | 5010   |
| RASGRP1   | 0.360791 | 1.64E-14    | 10125  |
| KIAA1586  | 0.360767 | 1.65E-14    | 57691  |
| PRKD3     | 0.360705 | 1.67E-14    | 23683  |
|           | 11-9月    |             |        |
| RAB29     | 0.360691 | 1.67E-14 NA |        |
|           | 0.360659 | 1.68E-14    | 8934   |
| TRIO      | 0.360542 | 1.72E-14    | 7204   |
| MXRA7     | 0.36046  | 1.74E-14    | 439921 |
| MCAM      | 0.360442 | 1.75E-14    | 4162   |
| PTPN22    | 0.360373 | 1.77E-14    | 26191  |
| DHX36     | 0.36037  | 1.77E-14    | 170506 |
| OTULIN    | 0.360368 | 1.77E-14    | 90268  |
| TNFAIP3   | 0.360288 | 1.79E-14    | 7128   |
| PALLD     | 0.360274 | 1.80E-14    | 23022  |
| RUFY3     | 0.360133 | 1.84E-14    | 22902  |
| RHCG      | 0.36004  | 1.88E-14    | 51458  |
| FAM83A    | 0.360013 | 1.88E-14    | 84985  |
| SLC12A8   | 0.35997  | 1.90E-14    | 84561  |
| CDC42EP3  | 0.359825 | 1.95E-14    | 10602  |
| JAK3      | 0.359802 | 1.96E-14    | 3718   |
| UNC5B     | 0.359785 | 1.96E-14    | 219699 |
| CDC73     | 0.359761 | 1.97E-14    | 79577  |
| SCIMP     | 0.359698 | 1.99E-14    | 388325 |
| PCDHGC3   | 0.359648 | 2.01E-14    | 5098   |
| MYOZ2     | 0.359554 | 2.04E-14    | 51778  |
| RAMP3     | 0.359537 | 2.05E-14    | 10268  |
| LEPR      | 0.359371 | 2.11E-14    | 3953   |
| DLEU7     | 0.359371 | 2.11E-14    | 220107 |
| TNFSF18   | 0.359341 | 2.12E-14    | 8995   |
| ZFP90     | 0.359304 | 2.14E-14    | 146198 |
| PELO      | 0.359296 | 2.14E-14    | 53918  |
| SYNC      | 0.359256 | 2.15E-14    | 81493  |
| MYCBP2    | 0.359204 | 2.18E-14    | 23077  |
| PCMTD1    | 0.359154 | 2.19E-14    | 115294 |
| ROBO1     | 0.359104 | 2.21E-14    | 6091   |
| CLASP1    | 0.35907  | 2.23E-14    | 23332  |
| SP100     | 0.358988 | 2.26E-14    | 6672   |
| ARL6      | 0.358972 | 2.27E-14    | 84100  |
| IFT81     | 0.358917 | 2.29E-14    | 28981  |
| PLEKHA1   | 0.358765 | 2.35E-14    | 59338  |
| GSAP      | 0.358695 | 2.38E-14    | 54103  |
| C10orf131 | 0.358668 | 2.39E-14 NA |        |
| KIAA1024  | 0.35852  | 2.45E-14 NA |        |
| AJAP1     | 0.35851  | 2.46E-14    | 55966  |
| MYBPH     | 0.358506 | 2.46E-14    | 4608   |
| TNN       | 0.35848  | 2.47E-14    | 63923  |
| STK32B    | 0.358371 | 2.52E-14    | 55351  |
| SERPINB2  | 0.358262 | 2.57E-14    | 5055   |
| C2CD2     | 0.35814  | 2.63E-14    | 25966  |
| CLEC2B    | 0.358123 | 2.63E-14    | 9976   |
| ASXL2     | 0.358006 | 2.69E-14    | 55252  |
| STEAP4    | 0.357743 | 2.82E-14    | 79689  |
| SMURF2    | 0.357595 | 2.89E-14    | 64750  |
| UBE2D1    | 0.357548 | 2.91E-14    | 7321   |
| MDGA1     | 0.357377 | 3.00E-14    | 266727 |

|            |          |             |           |
|------------|----------|-------------|-----------|
| TNFAIP2    | 0.357365 | 3.01E-14    | 7127      |
| PSTPIP1    | 0.357354 | 3.02E-14    | 9051      |
| KIAA1551   | 0.357349 | 3.02E-14 NA |           |
| GPR75-ASB3 | 0.357153 | 3.12E-14    | 100302652 |
| OAS2       | 0.357109 | 3.15E-14    | 4939      |
| EVI5       | 0.357102 | 3.15E-14    | 7813      |
| SMCO3      | 0.357081 | 3.16E-14    | 440087    |
| ZFAND5     | 0.357053 | 3.18E-14    | 7763      |
| GPR183     | 0.357018 | 3.20E-14    | 1880      |
| CFLAR      | 0.357001 | 3.21E-14    | 8837      |
| ZNF154     | 0.356948 | 3.24E-14    | 7710      |
| GLIS3      | 0.356836 | 3.30E-14    | 169792    |
| TTYH2      | 0.356831 | 3.31E-14    | 94015     |
| CDC42SE1   | 0.356819 | 3.31E-14    | 56882     |
| CTSO       | 0.356746 | 3.36E-14    | 1519      |
| MPRIIP     | 0.356719 | 3.37E-14    | 23164     |
| CLSTN3     | 0.356685 | 3.39E-14    | 9746      |
| RAB11FIP2  | 0.356599 | 3.44E-14    | 22841     |
| OSBPL9     | 0.356548 | 3.47E-14    | 114883    |
| LGI2       | 0.356406 | 3.56E-14    | 55203     |
| SV2B       | 0.35638  | 3.58E-14    | 9899      |
| KIAA0825   | 0.356379 | 3.58E-14    | 285600    |
| NME7       | 0.356301 | 3.63E-14    | 29922     |
| FZD8       | 0.356277 | 3.64E-14    | 8325      |
| ANKRD42    | 0.356227 | 3.68E-14    | 338699    |
| CTLA4      | 0.356154 | 3.72E-14    | 1493      |
| FABP4      | 0.355879 | 3.91E-14    | 2167      |
| USHBP1     | 0.355789 | 3.97E-14    | 83878     |
| GPR133     | 0.355739 | 4.00E-14 NA |           |
| ZKSCAN8    | 0.355659 | 4.06E-14    | 7745      |
| ZNF676     | 0.355659 | 4.06E-14    | 163223    |
| BLOC1S6    | 0.355562 | 4.13E-14    | 26258     |
| IGDCC4     | 0.355168 | 4.42E-14    | 57722     |
| C17orf107  | 0.355082 | 4.49E-14    | 100130311 |
| MEF2A      | 0.355037 | 4.53E-14    | 4205      |
| APOC2      | 0.355031 | 4.53E-14    | 344       |
| CDR2L      | 0.354936 | 4.61E-14    | 30850     |
| ERCC4      | 0.354852 | 4.67E-14    | 2072      |
| RANBP9     | 0.354794 | 4.72E-14    | 10048     |
| MALT1      | 0.354756 | 4.75E-14    | 10892     |
| ANGPTL4    | 0.354634 | 4.86E-14    | 51129     |
| AFAP1      | 0.354417 | 5.04E-14    | 60312     |
| CXCL9      | 0.354412 | 5.05E-14    | 4283      |
| TTC28      | 0.354342 | 5.11E-14    | 23331     |
| SMARCA1    | 0.35431  | 5.14E-14    | 6594      |
| TAF3       | 0.3543   | 5.15E-14    | 83860     |
| FBLN1      | 0.354194 | 5.24E-14    | 2192      |
| CYP19A1    | 0.354141 | 5.29E-14    | 1588      |
| NEK7       | 0.353986 | 5.44E-14    | 140609    |
| CDC27      | 0.35397  | 5.45E-14    | 996       |
| IGFL1      | 0.353929 | 5.49E-14    | 374918    |
| KLHL20     | 0.353856 | 5.56E-14    | 27252     |
| SLC16A4    | 0.353698 | 5.71E-14    | 9122      |
| AKAP2      | 0.353696 | 5.72E-14 NA |           |
| EPS15      | 0.353595 | 5.82E-14    | 2060      |
| CLNK       | 0.353572 | 5.84E-14    | 116449    |
| ELF2       | 0.353524 | 5.89E-14    | 1998      |
| GRHL1      | 0.353178 | 6.25E-14    | 29841     |
| KCNT2      | 0.353152 | 6.28E-14    | 343450    |
| STX6       | 0.353128 | 6.31E-14    | 10228     |

|          |          |             |        |
|----------|----------|-------------|--------|
| SEC24D   | 0.353121 | 6.32E-14    | 9871   |
| YWHAG    | 0.35298  | 6.47E-14    | 7532   |
| COL7A1   | 0.352759 | 6.72E-14    | 1294   |
| KLF12    | 0.352759 | 6.72E-14    | 11278  |
| WDR26    | 0.352755 | 6.73E-14    | 80232  |
| FADS1    | 0.352719 | 6.77E-14    | 3992   |
| CEP19    | 0.352694 | 6.80E-14    | 84984  |
| STAU2    | 0.352658 | 6.84E-14    | 27067  |
| ITGA2    | 0.352555 | 6.97E-14    | 3673   |
| TROVE2   | 0.352553 | 6.97E-14 NA |        |
| KLF11    | 0.352523 | 7.01E-14    | 8462   |
| KLHL7    | 0.352504 | 7.03E-14    | 55975  |
| CEP85L   | 0.352453 | 7.09E-14    | 387119 |
| RELT     | 0.352385 | 7.17E-14    | 84957  |
| DHH      | 0.352243 | 7.35E-14    | 50846  |
| KMT2A    | 0.352238 | 7.36E-14    | 4297   |
| INPP4A   | 0.351935 | 7.76E-14    | 3631   |
| CLIC2    | 0.351931 | 7.76E-14    | 1193   |
| ECEL1    | 0.351896 | 7.81E-14    | 9427   |
| YEATS2   | 0.351839 | 7.89E-14    | 55689  |
| FBXL2    | 0.351817 | 7.91E-14    | 25827  |
| TMEM163  | 0.351714 | 8.06E-14    | 81615  |
| KIAA1210 | 0.351678 | 8.11E-14    | 57481  |
| MDFI     | 0.351574 | 8.25E-14    | 4188   |
| CYGB     | 0.351499 | 8.36E-14    | 114757 |
| RAET1G   | 0.351487 | 8.38E-14    | 353091 |
| APBB1IP  | 0.35143  | 8.46E-14    | 54518  |
| CHPF     | 0.351311 | 8.64E-14    | 79586  |
| TEX14    | 0.351287 | 8.67E-14    | 56155  |
| SOX17    | 0.351131 | 8.91E-14    | 64321  |
| CHST10   | 0.351047 | 9.04E-14    | 9486   |
| FAM212A  | 0.351037 | 9.05E-14 NA |        |
| KRT80    | 0.351036 | 9.06E-14    | 144501 |
| KIF3A    | 0.350809 | 9.42E-14    | 11127  |
| RSF1     | 0.350784 | 9.46E-14    | 51773  |
| ZDHHC17  | 0.350703 | 9.59E-14    | 23390  |
| DOCK2    | 0.350637 | 9.70E-14    | 1794   |
| PRELP    | 0.350523 | 9.89E-14    | 5549   |
| KRT17    | 0.350481 | 9.96E-14    | 3872   |
| PCDHGA3  | 0.350476 | 9.97E-14    | 56112  |
| CBFB     | 0.350367 | 1.02E-13    | 865    |
| LURAP1   | 0.350161 | 1.05E-13    | 541468 |
| OAZ2     | 0.350114 | 1.06E-13    | 4947   |
| CLCF1    | 0.350048 | 1.07E-13    | 23529  |
| GTF2I    | 0.350041 | 1.07E-13    | 2969   |
| MAP3K1   | 0.350023 | 1.08E-13    | 4214   |
| ATG7     | 0.349885 | 1.10E-13    | 10533  |
| FMNL2    | 0.349872 | 1.11E-13    | 114793 |
| CCDC144A | 0.349869 | 1.11E-13    | 9720   |
| SUSD5    | 0.349859 | 1.11E-13    | 26032  |
| IGIP     | 0.349789 | 1.12E-13    | 492311 |
| PCED1B   | 0.349653 | 1.15E-13    | 91523  |
| CDC37L1  | 0.349628 | 1.15E-13    | 55664  |
| ZFYVE26  | 0.349624 | 1.15E-13    | 23503  |
| NCCRP1   | 0.349561 | 1.17E-13    | 342897 |
| MLC1     | 0.349406 | 1.20E-13    | 23209  |
| SAMD14   | 0.349392 | 1.20E-13    | 201191 |
| REV3L    | 0.34935  | 1.21E-13    | 5980   |
| ALS2     | 0.349322 | 1.22E-13    | 57679  |
| RAB42    | 0.34926  | 1.23E-13    | 115273 |

|          |          |             |        |
|----------|----------|-------------|--------|
| DENND6A  | 0.349218 | 1.24E-13    | 201627 |
| ICOS     | 0.349194 | 1.24E-13    | 29851  |
| FBXO30   | 0.349157 | 1.25E-13    | 84085  |
| TUBB6    | 0.349057 | 1.27E-13    | 84617  |
| YAP1     | 0.349027 | 1.28E-13    | 10413  |
| DNASE2   | 0.348887 | 1.31E-13    | 1777   |
| GREB1L   | 0.348854 | 1.32E-13    | 80000  |
| MYH8     | 0.348744 | 1.34E-13    | 4626   |
| ANKIB1   | 0.348744 | 1.34E-13    | 54467  |
| ITPR1    | 0.348607 | 1.37E-13    | 3708   |
| HSPA13   | 0.348483 | 1.40E-13    | 6782   |
| CLEC1B   | 0.348481 | 1.40E-13    | 51266  |
| COPS8    | 0.348459 | 1.41E-13    | 10920  |
| FRS2     | 0.348439 | 1.41E-13    | 10818  |
| INSIG2   | 0.348404 | 1.42E-13    | 51141  |
| RPAP2    | 0.34837  | 1.43E-13    | 79871  |
| NXPE3    | 0.348345 | 1.44E-13    | 91775  |
| CASS4    | 0.348328 | 1.44E-13    | 57091  |
| BMI1     | 0.348318 | 1.44E-13    | 648    |
| PLCB1    | 0.34825  | 1.46E-13    | 23236  |
| CAMSAP1  | 0.348191 | 1.47E-13    | 157922 |
| FZD2     | 0.347962 | 1.53E-13    | 2535   |
| TYW5     | 0.347909 | 1.55E-13    | 129450 |
| B3GALTL  | 0.347856 | 1.56E-13 NA |        |
| SLN      | 0.347778 | 1.58E-13    | 6588   |
| NAP1L3   | 0.347762 | 1.59E-13    | 4675   |
| PIKFYVE  | 0.347729 | 1.59E-13    | 200576 |
| CHORDC1  | 0.347724 | 1.60E-13    | 26973  |
| RNGTT    | 0.347711 | 1.60E-13    | 8732   |
| C4orf3   | 0.347637 | 1.62E-13    | 401152 |
| AHDC1    | 0.347592 | 1.63E-13    | 27245  |
| SHC1     | 0.347562 | 1.64E-13    | 6464   |
| HIAT1    | 0.347472 | 1.67E-13 NA |        |
| P4HA1    | 0.347423 | 1.68E-13    | 5033   |
| ZNF292   | 0.347381 | 1.69E-13    | 23036  |
| RAB33B   | 0.347214 | 1.74E-13    | 83452  |
| DPYD     | 0.347213 | 1.74E-13    | 1806   |
| DOCK11   | 0.347092 | 1.78E-13    | 139818 |
| SMIM13   | 0.347063 | 1.79E-13    | 221710 |
| STEAP1B  | 0.347026 | 1.80E-13    | 256227 |
| GPATCH2  | 0.347024 | 1.80E-13    | 55105  |
| CYS1     | 0.346989 | 1.81E-13    | 192668 |
| MS4A4A   | 0.346944 | 1.82E-13    | 51338  |
| C12orf79 | 0.346909 | 1.83E-13 NA |        |
| ITSN1    | 0.346857 | 1.85E-13    | 6453   |
| SNAPC1   | 0.346717 | 1.89E-13    | 6617   |
| OLFM2    | 0.34665  | 1.92E-13    | 93145  |
| CCDC82   | 0.346647 | 1.92E-13    | 79780  |
| EHBP1    | 0.346568 | 1.94E-13    | 23301  |
| TSPYL2   | 0.346557 | 1.95E-13    | 64061  |
| HACE1    | 0.346552 | 1.95E-13    | 57531  |
| RFX3     | 0.346516 | 1.96E-13    | 5991   |
| WSB1     | 0.346472 | 1.97E-13    | 26118  |
| METTL21B | 0.346404 | 2.00E-13 NA |        |
| AASS     | 0.346196 | 2.07E-13    | 10157  |
| SMURF1   | 0.345949 | 2.16E-13    | 57154  |
| UBE2Q2   | 0.345945 | 2.16E-13    | 92912  |
| KCTD7    | 0.34593  | 2.16E-13    | 154881 |
| ATG12    | 0.345884 | 2.18E-13    | 9140   |
| SOS1     | 0.345835 | 2.20E-13    | 6654   |

|              |          |          |           |
|--------------|----------|----------|-----------|
| DFNA5        | 0.345834 | 2.20E-13 | NA        |
| DPEP2        | 0.345759 | 2.23E-13 | 64174     |
| SEC22C       | 0.345523 | 2.32E-13 | 9117      |
| PLVAP        | 0.345473 | 2.34E-13 | 83483     |
| HSD17B6      | 0.345437 | 2.35E-13 | 8630      |
| DDX58        | 0.345435 | 2.35E-13 | 23586     |
| PCDHB7       | 0.345381 | 2.37E-13 | 56129     |
| BMPR1B       | 0.345345 | 2.39E-13 | 658       |
| ZNF449       | 0.345261 | 2.42E-13 | 203523    |
| C16orf72     | 0.345209 | 2.44E-13 | 29035     |
| C16orf71     | 0.345186 | 2.45E-13 | 146562    |
| UGCG         | 0.345073 | 2.50E-13 | 7357      |
| TMEM109      | 0.345033 | 2.52E-13 | 79073     |
| BLOC1S2      | 0.345024 | 2.52E-13 | 282991    |
| FBN2         | 0.344825 | 2.61E-13 | 2201      |
| NBN          | 0.344816 | 2.61E-13 | 4683      |
| WNT9B        | 0.344781 | 2.63E-13 | 7484      |
| TK2          | 0.344772 | 2.63E-13 | 7084      |
| TOR1AIP1     | 0.344767 | 2.63E-13 | 26092     |
| DNAJB6       | 0.34473  | 2.65E-13 | 10049     |
| PITPNB       | 0.344697 | 2.66E-13 | 23760     |
| ATXN3        | 0.344688 | 2.67E-13 | 4287      |
| TNRC6A       | 0.34449  | 2.76E-13 | 27327     |
| C5orf24      | 0.344442 | 2.78E-13 | 134553    |
| KIDINS220    | 0.344357 | 2.82E-13 | 57498     |
| A2M          | 0.344337 | 2.83E-13 | 2         |
| KIF17        | 0.344285 | 2.85E-13 | 57576     |
| HELZ         | 0.344241 | 2.88E-13 | 9931      |
| LILRA1       | 0.344148 | 2.92E-13 | 11024     |
| C1orf101     | 0.344135 | 2.93E-13 | NA        |
| DNAJC18      | 0.344074 | 2.96E-13 | 202052    |
| STK10        | 0.343929 | 3.03E-13 | 6793      |
| NFKBIE       | 0.3439   | 3.04E-13 | 4794      |
| PPP3CA       | 0.343874 | 3.06E-13 | 5530      |
| SCAF11       | 0.343788 | 3.10E-13 | 9169      |
| TMED7-TICAM2 | 0.343745 | 3.12E-13 | 100302736 |
| WNT7A        | 0.343639 | 3.18E-13 | 7476      |
| APOL3        | 0.343588 | 3.21E-13 | 80833     |
| MYH9         | 0.343512 | 3.25E-13 | 4627      |
| C4B          | 0.343397 | 3.31E-13 | 721       |
| ST3GAL1      | 0.343307 | 3.36E-13 | 6482      |
| CECR1        | 0.343262 | 3.39E-13 | NA        |
| TREML1       | 0.343074 | 3.50E-13 | 340205    |
| MKL2         | 0.342846 | 3.63E-13 | NA        |
| LPXN         | 0.342718 | 3.71E-13 | 9404      |
| ZNF699       | 0.342689 | 3.73E-13 | 374879    |
| RGS19        | 0.342674 | 3.74E-13 | 10287     |
| PRCD         | 0.34265  | 3.75E-13 | 768206    |
| CSF1R        | 0.342595 | 3.79E-13 | 1436      |
| ZBTB11       | 0.342527 | 3.83E-13 | 27107     |
| MX2          | 0.3425   | 3.85E-13 | 4600      |
| CEP120       | 0.342468 | 3.87E-13 | 153241    |
| RNF19A       | 0.342436 | 3.89E-13 | 25897     |
| NFIC         | 0.34229  | 3.99E-13 | 4782      |
| GPATCH8      | 0.342275 | 4.00E-13 | 23131     |
| ARL8B        | 0.34222  | 4.03E-13 | 55207     |
| MYO1G        | 0.342201 | 4.05E-13 | 64005     |
| SCARF1       | 0.341974 | 4.20E-13 | 8578      |
| MEX3C        | 0.34191  | 4.25E-13 | 51320     |
| HCFC1R1      | 0.341879 | 4.27E-13 | 54985     |

|          |          |          |        |
|----------|----------|----------|--------|
| CEP97    | 0.341795 | 4.33E-13 | 79598  |
| PARVA    | 0.341694 | 4.40E-13 | 55742  |
| NEMF     | 0.341682 | 4.41E-13 | 9147   |
| SFT2D2   | 0.341568 | 4.50E-13 | 375035 |
| TGM2     | 0.341523 | 4.53E-13 | 7052   |
| WDR19    | 0.341422 | 4.61E-13 | 57728  |
| SHISA2   | 0.341382 | 4.64E-13 | 387914 |
| AIF1     | 0.341372 | 4.64E-13 | 199    |
| GLT8D1   | 0.341336 | 4.67E-13 | 55830  |
| TMEM40   | 0.341321 | 4.68E-13 | 55287  |
| CRTC3    | 0.341308 | 4.69E-13 | 64784  |
| ETAA1    | 0.341249 | 4.74E-13 | 54465  |
| NPAT     | 0.341241 | 4.75E-13 | 4863   |
| NOD1     | 0.341151 | 4.82E-13 | 10392  |
| ZBTB4    | 0.341083 | 4.87E-13 | 57659  |
| GNPDA2   | 0.341058 | 4.89E-13 | 132789 |
| MAST4    | 0.341015 | 4.93E-13 | 375449 |
| M6PR     | 0.34098  | 4.96E-13 | 4074   |
| ATF2     | 0.340969 | 4.97E-13 | 1386   |
| LIMK1    | 0.340787 | 5.12E-13 | 3984   |
| PLXNA1   | 0.340467 | 5.40E-13 | 5361   |
| FBXO11   | 0.340435 | 5.43E-13 | 80204  |
| LRRC8A   | 0.340413 | 5.45E-13 | 56262  |
| TMEM52B  | 0.340361 | 5.49E-13 | 120939 |
| P3H4     | 0.340154 | 5.68E-13 | 10609  |
| FAM3C    | 0.340038 | 5.79E-13 | 10447  |
| BPIFB4   | 0.339992 | 5.84E-13 | 149954 |
| HCAR2    | 0.339901 | 5.93E-13 | 338442 |
| USP15    | 0.339884 | 5.94E-13 | 9958   |
| OSGIN2   | 0.339867 | 5.96E-13 | 734    |
| TRAPPC6B | 0.339854 | 5.97E-13 | 122553 |
| MKX      | 0.339678 | 6.15E-13 | 283078 |
| PPL      | 0.339666 | 6.16E-13 | 5493   |
| SELP     | 0.339538 | 6.29E-13 | 6403   |
| TRIM59   | 0.339392 | 6.45E-13 | 286827 |
| HLA-DQA1 | 0.339331 | 6.51E-13 | 3117   |
| KIAA0355 | 0.339205 | 6.65E-13 | NA     |
| OSBPL3   | 0.339101 | 6.76E-13 | 26031  |
| MEMO1    | 0.339002 | 6.88E-13 | 7795   |
| SLC25A30 | 0.338993 | 6.89E-13 | 253512 |
| ARPP19   | 0.338971 | 6.91E-13 | 10776  |
| PCDHGB7  | 0.338915 | 6.98E-13 | 56099  |
| VRK2     | 0.33884  | 7.06E-13 | 7444   |
| MOSPD1   | 0.338839 | 7.06E-13 | 56180  |
| NAIP     | 0.338814 | 7.09E-13 | 4671   |
| NBPF15   | 0.338787 | 7.12E-13 | 284565 |
| MOSPD2   | 0.338774 | 7.14E-13 | 158747 |
| RNF13    | 0.338724 | 7.20E-13 | 11342  |
| ZNF286A  | 0.33859  | 7.36E-13 | 57335  |
| CMKLR1   | 0.338491 | 7.48E-13 | 1240   |
| FOXN2    | 0.338483 | 7.49E-13 | 3344   |
| PTEN     | 0.338352 | 7.65E-13 | 5728   |
| XXYLT1   | 0.338213 | 7.83E-13 | 152002 |
| FAM220A  | 0.338199 | 7.85E-13 | 84792  |
| AGO4     | 0.338092 | 7.99E-13 | 192670 |
| CC2D2A   | 0.338081 | 8.00E-13 | 57545  |
| PCDHB10  | 0.338064 | 8.02E-13 | 56126  |
| KPNA1    | 0.338054 | 8.04E-13 | 3836   |
| CMTM1    | 0.337998 | 8.11E-13 | 113540 |
| NOS3     | 0.337956 | 8.17E-13 | 4846   |

|          |          |             |        |
|----------|----------|-------------|--------|
| ERGIC2   | 0.337947 | 8.18E-13    | 51290  |
| FOXC1    | 0.337915 | 8.22E-13    | 2296   |
| CCPG1    | 0.337875 | 8.28E-13    | 9236   |
| LAMP2    | 0.337861 | 8.30E-13    | 3920   |
| NFATC1   | 0.33774  | 8.46E-13    | 4772   |
| JAZF1    | 0.337725 | 8.48E-13    | 221895 |
| TNFSF12  | 0.337695 | 8.52E-13    | 8742   |
| HPS3     | 0.337624 | 8.62E-13    | 84343  |
| MANBA    | 0.33757  | 8.70E-13    | 4126   |
| DAB2     | 0.337543 | 8.74E-13    | 1601   |
| EID3     | 0.337529 | 8.76E-13    | 493861 |
| CD99L2   | 0.337492 | 8.81E-13    | 83692  |
| TMEM39A  | 0.337438 | 8.89E-13    | 55254  |
| CD4      | 0.337393 | 8.96E-13    | 920    |
| RASIP1   | 0.337275 | 9.13E-13    | 54922  |
| MS4A4E   | 0.33721  | 9.23E-13    | 643680 |
| CACUL1   | 0.337185 | 9.27E-13    | 143384 |
| XAF1     | 0.337183 | 9.27E-13    | 54739  |
| GYS2     | 0.337179 | 9.28E-13    | 2998   |
| SLC12A1  | 0.337169 | 9.29E-13    | 6557   |
| NBPF8    | 0.337148 | 9.32E-13    | 728841 |
| USP31    | 0.337133 | 9.35E-13    | 57478  |
| CCDC89   | 0.337084 | 9.42E-13    | 220388 |
| SMCO2    | 0.337037 | 9.50E-13    | 341346 |
| ZIK1     | 0.336778 | 9.91E-13    | 284307 |
| MAN1A2   | 0.336768 | 9.92E-13    | 10905  |
| BOD1L1   | 0.336758 | 9.94E-13    | 259282 |
| SPRED1   | 0.336699 | 1.00E-12    | 161742 |
| ZNF385A  | 0.336668 | 1.01E-12    | 25946  |
| CFAP97   | 0.336656 | 1.01E-12    | 57587  |
| TMEM200C | 0.336635 | 1.01E-12    | 645369 |
| ZNF280D  | 0.336538 | 1.03E-12    | 54816  |
| PGBD3    | 0.336521 | 1.03E-12    | 267004 |
| CLOCK    | 0.336519 | 1.03E-12    | 9575   |
| VASH2    | 0.336475 | 1.04E-12    | 79805  |
| SOCS4    | 0.336458 | 1.04E-12    | 122809 |
| LAT2     | 0.336298 | 1.07E-12    | 7462   |
| DENND4A  | 0.336239 | 1.08E-12    | 10260  |
| TMEM136  | 0.336051 | 1.12E-12 NA |        |
| PHIP     | 0.336    | 1.12E-12    | 55023  |
| QSER1    | 0.335989 | 1.13E-12    | 79832  |
| MAP3K2   | 0.335971 | 1.13E-12    | 10746  |
| C9orf47  | 0.335948 | 1.13E-12    | 286223 |
| PARP14   | 0.335905 | 1.14E-12    | 54625  |
| LY6D     | 0.335769 | 1.17E-12    | 8581   |
| GRIA3    | 0.335542 | 1.21E-12    | 2892   |
| FOXO1    | 0.335363 | 1.25E-12    | 2308   |
| VEZF1    | 0.335335 | 1.25E-12    | 7716   |
| CORO1C   | 0.33531  | 1.26E-12    | 23603  |
| IBSP     | 0.335222 | 1.28E-12    | 3381   |
| SRSF12   | 0.335152 | 1.29E-12    | 135295 |
| DOCK9    | 0.335149 | 1.29E-12    | 23348  |
| C12orf4  | 0.334961 | 1.33E-12    | 57102  |
| AJUBA    | 0.334955 | 1.33E-12    | 84962  |
| ZNF430   | 0.334826 | 1.36E-12    | 80264  |
| OSM      | 0.33477  | 1.37E-12    | 5008   |
| ERCC6    | 0.334754 | 1.38E-12    | 2074   |
| ATRX     | 0.334679 | 1.39E-12    | 546    |
| CD14     | 0.334599 | 1.41E-12    | 929    |
| FHL5     | 0.334585 | 1.42E-12    | 9457   |



|               |          |             |        |
|---------------|----------|-------------|--------|
| SLC9B2        | 0.334451 | 1.45E-12    | 133308 |
| ARHGAP30      | 0.33428  | 1.49E-12    | 257106 |
| CERS3         | 0.334173 | 1.51E-12    | 204219 |
| C4orf32       | 0.334163 | 1.52E-12 NA |        |
| AP1M1         | 0.33414  | 1.52E-12    | 8907   |
| EID1          | 0.334059 | 1.54E-12    | 23741  |
| CASP4         | 0.33395  | 1.57E-12    | 837    |
| MCF2          | 0.333944 | 1.57E-12    | 4168   |
| C8orf58       | 0.333902 | 1.58E-12    | 541565 |
| RNF225        | 0.333876 | 1.59E-12    | 646862 |
| FAM91A1       | 0.333864 | 1.59E-12    | 157769 |
| ZNF618        | 0.333848 | 1.60E-12    | 114991 |
| MTR           | 0.333771 | 1.62E-12    | 4548   |
| GLS           | 0.333732 | 1.63E-12    | 2744   |
| CHD9          | 0.333676 | 1.64E-12    | 80205  |
| SRPK2         | 0.333673 | 1.64E-12    | 6733   |
| ZMYM4         | 0.333673 | 1.64E-12    | 9202   |
| TNRC6C        | 0.333537 | 1.68E-12    | 57690  |
| HSPB2         | 0.333409 | 1.71E-12    | 3316   |
| MMP12         | 0.333382 | 1.72E-12    | 4321   |
| MEFV          | 0.333367 | 1.72E-12    | 4210   |
| USP32         | 0.333357 | 1.73E-12    | 84669  |
| CCDC6         | 0.333318 | 1.74E-12    | 8030   |
| PPP1R12A      | 0.333184 | 1.78E-12    | 4659   |
| DUSP14        | 0.333147 | 1.79E-12    | 11072  |
| SPATA9        | 0.333134 | 1.79E-12    | 83890  |
| MECP2         | 0.333038 | 1.82E-12    | 4204   |
| CPEB4         | 0.333026 | 1.82E-12    | 80315  |
| SGCE          | 0.332963 | 1.84E-12    | 8910   |
| ADAR          | 0.332961 | 1.84E-12    | 103    |
| CMTM6         | 0.332882 | 1.87E-12    | 54918  |
| CLASP2        | 0.332872 | 1.87E-12    | 23122  |
| PHACTR3       | 0.332821 | 1.88E-12    | 116154 |
| RICTOR        | 0.332774 | 1.90E-12    | 253260 |
| SMIM10        | 0.332768 | 1.90E-12    | 644538 |
| FBXW11        | 0.332767 | 1.90E-12    | 23291  |
| POLI          | 0.332734 | 1.91E-12    | 11201  |
| VCPIP1        | 0.33273  | 1.91E-12    | 80124  |
| SAV1          | 0.332589 | 1.96E-12    | 60485  |
| IL27RA        | 0.332373 | 2.02E-12    | 9466   |
| TULP4         | 0.33234  | 2.04E-12    | 56995  |
| CCP110        | 0.33228  | 2.05E-12    | 9738   |
| TPP1          | 0.332225 | 2.07E-12    | 1200   |
| HCFC2         | 0.332202 | 2.08E-12    | 29915  |
| CFI           | 0.332162 | 2.09E-12    | 3426   |
| IMPAD1        | 0.332148 | 2.10E-12 NA |        |
| ARHGAP15      | 0.332013 | 2.15E-12    | 55843  |
| CTNS          | 0.331985 | 2.15E-12    | 1497   |
| ZCCHC11       | 0.3319   | 2.18E-12 NA |        |
| PRL           | 0.331899 | 2.18E-12    | 5617   |
| ZNHIT6        | 0.331878 | 2.19E-12    | 54680  |
| STON1-GTF2A1L | 0.331865 | 2.20E-12    | 286749 |
| PRNP          | 0.331799 | 2.22E-12    | 5621   |
| FAM171B       | 0.331778 | 2.23E-12    | 165215 |
| CBLN3         | 0.331747 | 2.24E-12    | 643866 |
| TNFSF11       | 0.331696 | 2.26E-12    | 8600   |
| BTN2A2        | 0.331599 | 2.29E-12    | 10385  |
| FKBP9         | 0.331555 | 2.31E-12    | 11328  |
| LDOC1         | 0.331494 | 2.33E-12    | 23641  |
| HERC4         | 0.331345 | 2.39E-12    | 26091  |

|          |          |          |        |
|----------|----------|----------|--------|
| GTDC1    | 0.331336 | 2.39E-12 | 79712  |
| NAB1     | 0.331273 | 2.42E-12 | 4664   |
| TP63     | 0.331267 | 2.42E-12 | 8626   |
| CGGBP1   | 0.331244 | 2.43E-12 | 8545   |
| UHRF2    | 0.331237 | 2.43E-12 | 115426 |
| HCLS1    | 0.331137 | 2.47E-12 | 3059   |
| ZNF385D  | 0.331107 | 2.48E-12 | 79750  |
| TMEM245  | 0.331035 | 2.51E-12 | 23731  |
| CIDEA    | 0.330998 | 2.52E-12 | 1149   |
| RPS6KB1  | 0.330839 | 2.59E-12 | 6198   |
| APOL4    | 0.330771 | 2.62E-12 | 80832  |
| GPR180   | 0.33072  | 2.64E-12 | 160897 |
| SNURF    | 0.33067  | 2.66E-12 | 8926   |
| AZI2     | 0.330655 | 2.67E-12 | 64343  |
| THADA    | 0.33063  | 2.68E-12 | 63892  |
| GPAM     | 0.330619 | 2.68E-12 | 57678  |
| FAT2     | 0.330599 | 2.69E-12 | 2196   |
| ZNF264   | 0.330542 | 2.72E-12 | 9422   |
| NCOA3    | 0.330492 | 2.74E-12 | 8202   |
| ESCO1    | 0.330426 | 2.77E-12 | 114799 |
| TCEAL4   | 0.330415 | 2.77E-12 | 79921  |
| S100A8   | 0.330324 | 2.81E-12 | 6279   |
| GBGT1    | 0.330304 | 2.82E-12 | 26301  |
| ALKBH8   | 0.330283 | 2.83E-12 | 91801  |
| KAT6A    | 0.330255 | 2.84E-12 | 7994   |
| SLC16A7  | 0.330223 | 2.86E-12 | 9194   |
| CREB3L2  | 0.330214 | 2.86E-12 | 64764  |
| RPGRIP1L | 0.330206 | 2.87E-12 | 23322  |
| BAZ2B    | 0.330004 | 2.96E-12 | 29994  |
| SP4      | 0.329964 | 2.98E-12 | 6671   |
| WNT5A    | 0.32994  | 2.99E-12 | 7474   |
| DPY19L1  | 0.329929 | 2.99E-12 | 23333  |
| UBLCP1   | 0.329775 | 3.07E-12 | 134510 |
| MTMR2    | 0.329774 | 3.07E-12 | 8898   |
| ZFR      | 0.329722 | 3.10E-12 | 51663  |
| ZFYVE16  | 0.329636 | 3.14E-12 | 9765   |
| THAP1    | 0.329508 | 3.20E-12 | 55145  |
| ANKAR    | 0.329503 | 3.20E-12 | 150709 |
| RASA3    | 0.329491 | 3.21E-12 | 22821  |
| MORF4L1  | 0.329429 | 3.24E-12 | 10933  |
| CSF2RA   | 0.329381 | 3.27E-12 | 1438   |
| ADAM9    | 0.329313 | 3.30E-12 | 8754   |
| SOX5     | 0.329145 | 3.39E-12 | 6660   |
| TMEM106A | 0.329142 | 3.39E-12 | 113277 |
| CYB5R1   | 0.329042 | 3.45E-12 | 51706  |
| KLHL24   | 0.329024 | 3.46E-12 | 54800  |
| CR1L     | 0.329024 | 3.46E-12 | 1379   |
| SYT14    | 0.328987 | 3.48E-12 | 255928 |
| IFI44    | 0.328672 | 3.66E-12 | 10561  |
| FRA10AC1 | 0.328621 | 3.69E-12 | 118924 |
| VSIG4    | 0.328603 | 3.70E-12 | 11326  |
| PHC1     | 0.3285   | 3.76E-12 | 1911   |
| PRICKLE2 | 0.328439 | 3.80E-12 | 166336 |
| KDM5A    | 0.328432 | 3.80E-12 | 5927   |
| PARD6G   | 0.328408 | 3.81E-12 | 84552  |
| ACTR3    | 0.328407 | 3.82E-12 | 10096  |
| ARID1B   | 0.328286 | 3.89E-12 | 57492  |
| TNR      | 0.328154 | 3.97E-12 | 7143   |
| FKBP10   | 0.328114 | 4.00E-12 | 60681  |
| RB1CC1   | 0.328062 | 4.03E-12 | 9821   |

|           |          |             |        |
|-----------|----------|-------------|--------|
| SLC9C1    | 0.328041 | 4.04E-12    | 285335 |
| CD68      | 0.32794  | 4.11E-12    | 968    |
| ZNF483    | 0.327913 | 4.13E-12    | 158399 |
| SPTY2D1   | 0.327846 | 4.17E-12    | 144108 |
| FAM69A    | 0.327825 | 4.18E-12 NA |        |
| KIAA2026  | 0.327773 | 4.22E-12    | 158358 |
| LRRC58    | 0.327746 | 4.24E-12    | 116064 |
| ZNF570    | 0.327737 | 4.24E-12    | 148268 |
| SCLT1     | 0.327724 | 4.25E-12    | 132320 |
| SMG1      | 0.327646 | 4.30E-12    | 23049  |
| GOLT1B    | 0.327638 | 4.31E-12    | 51026  |
| LINGO2    | 0.327574 | 4.35E-12    | 158038 |
| NF1       | 0.327572 | 4.35E-12    | 4763   |
| HSPBAP1   | 0.327507 | 4.40E-12    | 79663  |
| MEGF9     | 0.327461 | 4.43E-12    | 1955   |
| HIVEP3    | 0.327437 | 4.45E-12    | 59269  |
| DCBLD2    | 0.327408 | 4.47E-12    | 131566 |
| SEC63     | 0.327368 | 4.50E-12    | 11231  |
| NUFIP2    | 0.327345 | 4.51E-12    | 57532  |
| TNFAIP8L2 | 0.327317 | 4.53E-12    | 79626  |
| ZRANB1    | 0.327245 | 4.59E-12    | 54764  |
| CPQ       | 0.3271   | 4.69E-12    | 10404  |
| L3MBTL3   | 0.327085 | 4.70E-12    | 84456  |
| C1RL      | 0.327084 | 4.70E-12    | 51279  |
| ZNF143    | 0.32705  | 4.73E-12    | 7702   |
| KCNK12    | 0.327001 | 4.77E-12    | 56660  |
| SLC12A6   | 0.326957 | 4.80E-12    | 9990   |
| SENP1     | 0.326912 | 4.83E-12    | 29843  |
| DTWD1     | 0.326829 | 4.90E-12    | 56986  |
| SNX16     | 0.326799 | 4.92E-12    | 64089  |
| IGF1R     | 0.326702 | 5.00E-12    | 3480   |
| SLCO1C1   | 0.326669 | 5.02E-12    | 53919  |
| NOG       | 0.326603 | 5.07E-12    | 9241   |
| PIK3C2A   | 0.326503 | 5.16E-12    | 5286   |
| PHC3      | 0.326461 | 5.19E-12    | 80012  |
| PRG4      | 0.326452 | 5.20E-12    | 10216  |
| ENDOU     | 0.32639  | 5.25E-12    | 8909   |
| GRM6      | 0.326361 | 5.27E-12    | 2916   |
| CRLF2     | 0.326284 | 5.34E-12    | 64109  |
| FAM208A   | 0.326211 | 5.40E-12 NA |        |
| ATP6AP1L  | 0.326206 | 5.40E-12    | 92270  |
| ZNF781    | 0.326201 | 5.41E-12    | 163115 |
| EPG5      | 0.326085 | 5.51E-12    | 57724  |
| TBX19     | 0.326064 | 5.52E-12    | 9095   |
| SYNCRIP   | 0.326026 | 5.56E-12    | 10492  |
| NCKAP1    | 0.326023 | 5.56E-12    | 10787  |
| APOBEC3H  | 0.326008 | 5.57E-12    | 164668 |
| GBE1      | 0.325949 | 5.62E-12    | 2632   |
| VPS41     | 0.325831 | 5.73E-12    | 27072  |
| PLIN1     | 0.325792 | 5.77E-12    | 5346   |
| SAMD3     | 0.325768 | 5.79E-12    | 154075 |
| ZNF880    | 0.325758 | 5.80E-12    | 400713 |
| FERMT2    | 0.325735 | 5.82E-12    | 10979  |
| SLC7A6OS  | 0.325631 | 5.91E-12    | 84138  |
| SOGA1     | 0.325544 | 5.99E-12    | 140710 |
| MID2      | 0.325454 | 6.08E-12    | 11043  |
| ZNF569    | 0.325452 | 6.08E-12    | 148266 |
| CGB7      | 0.325357 | 6.17E-12    | 94027  |
| IKZF5     | 0.325297 | 6.23E-12    | 64376  |
| CD72      | 0.325295 | 6.23E-12    | 971    |

|               |          |             |        |
|---------------|----------|-------------|--------|
| RGS20         | 0.325207 | 6.32E-12    | 8601   |
| IL7R          | 0.325145 | 6.38E-12    | 3575   |
| WAPAL         | 0.325089 | 6.44E-12 NA |        |
| STAT1         | 0.325083 | 6.44E-12    | 6772   |
| TAF2          | 0.325058 | 6.47E-12    | 6873   |
| MAP7D3        | 0.325012 | 6.52E-12    | 79649  |
| CD47          | 0.324979 | 6.55E-12    | 961    |
| STRADA        | 0.324948 | 6.58E-12    | 92335  |
| ZNF148        | 0.32485  | 6.68E-12    | 7707   |
| SNN           | 0.324811 | 6.72E-12    | 8303   |
| GPSM3         | 0.324752 | 6.79E-12    | 63940  |
| BTN3A3        | 0.324672 | 6.87E-12    | 10384  |
| DR1           | 0.324647 | 6.90E-12    | 1810   |
| AFF4          | 0.324499 | 7.06E-12    | 27125  |
| MLLT11        | 0.324429 | 7.14E-12    | 10962  |
| LIPA          | 0.324396 | 7.18E-12    | 3988   |
| IL10RA        | 0.324327 | 7.25E-12    | 3587   |
| ZNFX1         | 0.324287 | 7.30E-12    | 57169  |
| EMR3          | 0.324286 | 7.30E-12 NA |        |
| SLC38A7       | 0.324281 | 7.30E-12    | 55238  |
| DST           | 0.323974 | 7.66E-12    | 667    |
| NR1D2         | 0.323965 | 7.67E-12    | 9975   |
| SRGAP1        | 0.323885 | 7.77E-12    | 57522  |
| RLF           | 0.323842 | 7.82E-12    | 6018   |
| LGALS12       | 0.323827 | 7.84E-12    | 85329  |
| ZNF546        | 0.323617 | 8.10E-12    | 339327 |
| CLEC2D        | 0.323545 | 8.19E-12    | 29121  |
| KIAA0196      | 0.323498 | 8.25E-12 NA |        |
| UTRN          | 0.323447 | 8.32E-12    | 7402   |
| ZNF860        | 0.323233 | 8.60E-12    | 344787 |
| PNMAL1        | 0.32322  | 8.62E-12 NA |        |
| C16orf87      | 0.323115 | 8.76E-12    | 388272 |
| RAP2A         | 0.323028 | 8.88E-12    | 5911   |
| USP47         | 0.322983 | 8.94E-12    | 55031  |
| AHNAK2        | 0.322966 | 8.97E-12    | 113146 |
| TUB           | 0.322774 | 9.24E-12    | 7275   |
| RPS6KC1       | 0.322734 | 9.30E-12    | 26750  |
| ADCY7         | 0.322714 | 9.33E-12    | 113    |
| MAPK11        | 0.322661 | 9.40E-12    | 5600   |
| DOK2          | 0.322612 | 9.47E-12    | 9046   |
| RP5-1021I20.4 | 0.322609 | 9.48E-12 NA |        |
| HIVEP1        | 0.322574 | 9.53E-12    | 3096   |
| ZNF624        | 0.322521 | 9.61E-12    | 57547  |
| DBN1          | 0.322477 | 9.67E-12    | 1627   |
| KCTD10        | 0.322462 | 9.70E-12    | 83892  |
| MTSS1L        | 0.322418 | 9.76E-12 NA |        |
| LIPE          | 0.322341 | 9.88E-12    | 3991   |
| ZNF555        | 0.322289 | 9.96E-12    | 148254 |
| RFX7          | 0.322232 | 1.00E-11    | 64864  |
| ARMCX1        | 0.322176 | 1.01E-11    | 51309  |
| USP34         | 0.322051 | 1.03E-11    | 9736   |
| PXK           | 0.322003 | 1.04E-11    | 54899  |
| SHC4          | 0.322002 | 1.04E-11    | 399694 |
| XRN1          | 0.321978 | 1.05E-11    | 54464  |
| C7orf25       | 0.321969 | 1.05E-11    | 79020  |
| CD59          | 0.321967 | 1.05E-11    | 966    |
| TANK          | 0.321886 | 1.06E-11    | 10010  |
| RP11-196G11.1 | 0.321773 | 1.08E-11 NA |        |
| STK17A        | 0.321764 | 1.08E-11    | 9263   |
| SLC35G2       | 0.321635 | 1.10E-11    | 80723  |

|            |          |          |           |
|------------|----------|----------|-----------|
| ZNF70      | 0.321629 | 1.10E-11 | 7621      |
| PDCL       | 0.321619 | 1.11E-11 | 5082      |
| EEA1       | 0.321497 | 1.13E-11 | 8411      |
| COLQ       | 0.321454 | 1.13E-11 | 8292      |
| NEDD1      | 0.321444 | 1.14E-11 | 121441    |
| PRDM1      | 0.321435 | 1.14E-11 | 639       |
| RNF2       | 0.321272 | 1.17E-11 | 6045      |
| PTPRC      | 0.321205 | 1.18E-11 | 5788      |
| NRROS      | 0.321173 | 1.18E-11 | 375387    |
| SMNDC1     | 0.321111 | 1.20E-11 | 10285     |
| DCP2       | 0.321059 | 1.20E-11 | 167227    |
| PTPN5      | 0.321058 | 1.21E-11 | 84867     |
| RGL1       | 0.321013 | 1.21E-11 | 23179     |
| ZNF354C    | 0.321007 | 1.21E-11 | 30832     |
| ANO1       | 0.321002 | 1.22E-11 | 55107     |
| GNAI3      | 0.32097  | 1.22E-11 | 2773      |
| SDCBP      | 0.320939 | 1.23E-11 | 6386      |
| PLEKHF1    | 0.320887 | 1.24E-11 | 79156     |
| IFITM10    | 0.320844 | 1.25E-11 | 402778    |
| PPP3CB     | 0.320816 | 1.25E-11 | 5532      |
| DYNC1LI1   | 0.320803 | 1.25E-11 | 51143     |
| CCDC30     | 0.320797 | 1.25E-11 | 728621    |
| MTDH       | 0.320783 | 1.26E-11 | 92140     |
| CD82       | 0.320776 | 1.26E-11 | 3732      |
| WDR41      | 0.320747 | 1.26E-11 | 55255     |
| PLEKHA8    | 0.320663 | 1.28E-11 | 84725     |
| SLC30A6    | 0.320652 | 1.28E-11 | 55676     |
| WDFY1      | 0.320619 | 1.29E-11 | 57590     |
| CNTN1      | 0.320596 | 1.29E-11 | 1272      |
| GLMP       | 0.320556 | 1.30E-11 | 112770    |
| C9orf3     | 0.32054  | 1.31E-11 | NA        |
| DIP2B      | 0.320472 | 1.32E-11 | 57609     |
| ESYT2      | 0.320454 | 1.32E-11 | 57488     |
| CASP8AP2   | 0.320404 | 1.33E-11 | 9994      |
| TRIM33     | 0.320395 | 1.33E-11 | 51592     |
| NFATC3     | 0.320366 | 1.34E-11 | 4775      |
| KIN        | 0.320168 | 1.38E-11 | 22944     |
| RNF130     | 0.320056 | 1.41E-11 | 55819     |
| STAM       | 0.319976 | 1.42E-11 | 8027      |
| CKLF-CMTM1 | 0.319918 | 1.44E-11 | 100529251 |
| HBP1       | 0.319916 | 1.44E-11 | 26959     |
| XYLT1      | 0.319869 | 1.45E-11 | 64131     |
| PNPLA8     | 0.319845 | 1.45E-11 | 50640     |
| WDR44      | 0.319833 | 1.46E-11 | 54521     |
| RNF122     | 0.319791 | 1.46E-11 | 79845     |
| HS2ST1     | 0.319685 | 1.49E-11 | 9653      |
| RBM12B     | 0.319681 | 1.49E-11 | 389677    |
| ARID2      | 0.319663 | 1.49E-11 | 196528    |
| CCL4L1     | 0.319629 | 1.50E-11 | 388372    |
| PRSS27     | 0.319574 | 1.51E-11 | 83886     |
| MAP4K3     | 0.319556 | 1.52E-11 | 8491      |
| EPSTI1     | 0.319443 | 1.55E-11 | 94240     |
| PTPDC1     | 0.319407 | 1.55E-11 | 138639    |
| CDK2AP1    | 0.319401 | 1.56E-11 | 8099      |
| TRAF1      | 0.319368 | 1.56E-11 | 7185      |
| PHACTR1    | 0.319347 | 1.57E-11 | 221692    |
| GTF2A1     | 0.319198 | 1.60E-11 | 2957      |
| MED17      | 0.319191 | 1.61E-11 | 9440      |
| USO1       | 0.319159 | 1.61E-11 | 8615      |
| KDM2A      | 0.319123 | 1.62E-11 | 22992     |

|             |          |             |           |
|-------------|----------|-------------|-----------|
| RAB2B       | 0.319093 | 1.63E-11    | 84932     |
| LYPD3       | 0.319024 | 1.65E-11    | 27076     |
| TMEM55A     | 0.318976 | 1.66E-11 NA |           |
| ELMO2       | 0.318904 | 1.68E-11    | 63916     |
| SRRD        | 0.318735 | 1.72E-11    | 402055    |
| NHLRC2      | 0.318656 | 1.74E-11    | 374354    |
| PDLIM4      | 0.318573 | 1.77E-11    | 8572      |
| DPYS        | 0.318477 | 1.79E-11    | 1807      |
| BPTF        | 0.318402 | 1.81E-11    | 2186      |
| GRAP        | 0.318358 | 1.82E-11    | 10750     |
| SVEP1       | 0.318256 | 1.85E-11    | 79987     |
| MED13       | 0.31822  | 1.86E-11    | 9969      |
| TUSC5       | 0.318182 | 1.87E-11 NA |           |
| C3orf58     | 0.318107 | 1.90E-11 NA |           |
| ZNF451      | 0.317971 | 1.94E-11    | 26036     |
| DAAM1       | 0.317945 | 1.94E-11    | 23002     |
| AZIN1       | 0.317935 | 1.95E-11    | 51582     |
| TMEM67      | 0.317923 | 1.95E-11    | 91147     |
| SMAD5       | 0.317909 | 1.95E-11    | 4090      |
| PKP1        | 0.317893 | 1.96E-11    | 5317      |
| SPAST       | 0.317827 | 1.98E-11    | 6683      |
| CUL5        | 0.317816 | 1.98E-11    | 8065      |
| F8          | 0.31779  | 1.99E-11    | 2157      |
| LHFPL2      | 0.317742 | 2.00E-11    | 10184     |
| CRIM1       | 0.317542 | 2.07E-11    | 51232     |
| POGLUT1     | 0.317526 | 2.07E-11    | 56983     |
| LILRA5      | 0.317478 | 2.09E-11    | 353514    |
| GBP1        | 0.31747  | 2.09E-11    | 2633      |
| WDR82       | 0.317461 | 2.09E-11    | 80335     |
| LNPEP       | 0.31741  | 2.11E-11    | 4012      |
| MORC3       | 0.317404 | 2.11E-11    | 23515     |
| RNF216      | 0.317375 | 2.12E-11    | 54476     |
| C4orf47     | 0.317301 | 2.14E-11    | 441054    |
| TIGD7       | 0.317133 | 2.20E-11    | 91151     |
| TNFAIP1     | 0.317118 | 2.20E-11    | 7126      |
| ADAMTSL4    | 0.316974 | 2.25E-11    | 54507     |
| STEAP1      | 0.316956 | 2.26E-11    | 26872     |
| ATP6V1C1    | 0.316914 | 2.27E-11    | 528       |
| ZYX         | 0.316827 | 2.30E-11    | 7791      |
| NAALAD2     | 0.316807 | 2.31E-11    | 10003     |
| SEC62       | 0.316753 | 2.33E-11    | 7095      |
| C10orf128   | 0.316624 | 2.38E-11 NA |           |
| LARP6       | 0.316594 | 2.39E-11    | 55323     |
| C2orf44     | 0.316488 | 2.43E-11 NA |           |
| EXTL3       | 0.316464 | 2.44E-11    | 2137      |
| CLK4        | 0.316286 | 2.50E-11    | 57396     |
| SLK         | 0.316225 | 2.52E-11    | 9748      |
| IQCJ-SCHIP1 | 0.316213 | 2.53E-11    | 100505385 |
| CTF1        | 0.316146 | 2.56E-11    | 1489      |
| TLR5        | 0.316069 | 2.59E-11    | 7100      |
| ABHD13      | 0.316016 | 2.61E-11    | 84945     |
| SCAMP1      | 0.316005 | 2.61E-11    | 9522      |
| C1orf100    | 0.31583  | 2.68E-11    | 200159    |
| PCDHGC5     | 0.315817 | 2.69E-11    | 56097     |
| SKIL        | 0.315803 | 2.69E-11    | 6498      |
| AKAP13      | 0.315755 | 2.71E-11    | 11214     |
| BTRC        | 0.315711 | 2.73E-11    | 8945      |
| SLC39A10    | 0.315694 | 2.74E-11    | 57181     |
| BZW1        | 0.315679 | 2.74E-11    | 9689      |
| S100A9      | 0.315656 | 2.75E-11    | 6280      |

|              |          |          |           |
|--------------|----------|----------|-----------|
| AKR1B1       | 0.315559 | 2.79E-11 | 231       |
| TLL2         | 0.315449 | 2.84E-11 | 7093      |
| ANKDD1A      | 0.315427 | 2.85E-11 | 348094    |
| SYTL3        | 0.315413 | 2.86E-11 | 94120     |
| KRT6B        | 0.315345 | 2.88E-11 | 3854      |
| ADD2         | 0.31533  | 2.89E-11 | 119       |
| WDR81        | 0.315289 | 2.91E-11 | 124997    |
| ZNF37A       | 0.315236 | 2.93E-11 | 7587      |
| KRT16        | 0.315209 | 2.94E-11 | 3868      |
| RIF1         | 0.315192 | 2.95E-11 | 55183     |
| SNRK         | 0.315192 | 2.95E-11 | 54861     |
| NEFH         | 0.315162 | 2.97E-11 | 4744      |
| ATAD1        | 0.315161 | 2.97E-11 | 84896     |
| LRRC4C       | 0.315119 | 2.98E-11 | 57689     |
| KIAA1429     | 0.314994 | 3.04E-11 | NA        |
| C15orf59     | 0.314911 | 3.08E-11 | NA        |
| ZNF185       | 0.314852 | 3.11E-11 | 7739      |
| NFAT5        | 0.314851 | 3.11E-11 | 10725     |
| 8-9月         | 0.314836 | 3.11E-11 | NA        |
| HEXA         | 0.3148   | 3.13E-11 | 3073      |
| ZBTB21       | 0.314788 | 3.14E-11 | 49854     |
| GABPA        | 0.314694 | 3.18E-11 | 2551      |
| DPY19L4      | 0.314681 | 3.19E-11 | 286148    |
| FEZ1         | 0.314654 | 3.20E-11 | 9638      |
| IL36G        | 0.314582 | 3.24E-11 | 56300     |
| FOXJ2        | 0.314568 | 3.24E-11 | 55810     |
| HERC5        | 0.314544 | 3.26E-11 | 51191     |
| PCNP         | 0.314543 | 3.26E-11 | 57092     |
| BCAP29       | 0.31449  | 3.28E-11 | 55973     |
| SPATC1       | 0.314442 | 3.31E-11 | 375686    |
| RNF213       | 0.314427 | 3.31E-11 | 57674     |
| ACBD3        | 0.314382 | 3.34E-11 | 64746     |
| ASCC1        | 0.314373 | 3.34E-11 | 51008     |
| PCDHB12      | 0.314351 | 3.35E-11 | 56124     |
| G3BP1        | 0.31434  | 3.36E-11 | 10146     |
| TTC3         | 0.314294 | 3.38E-11 | 7267      |
| FBXW2        | 0.314234 | 3.41E-11 | 26190     |
| ZBTB33       | 0.314201 | 3.43E-11 | 10009     |
| VEZT         | 0.314182 | 3.44E-11 | 55591     |
| ATXN1L       | 0.314066 | 3.50E-11 | 342371    |
| MBNL1        | 0.313908 | 3.58E-11 | 4154      |
| GPRASP2      | 0.313787 | 3.65E-11 | 114928    |
| RP11-38C17.1 | 0.313735 | 3.68E-11 | NA        |
| ACTN3        | 0.313697 | 3.70E-11 | 89        |
| TSC22D3      | 0.313635 | 3.73E-11 | 1831      |
| CCDC117      | 0.313558 | 3.78E-11 | 150275    |
| IL36RN       | 0.313483 | 3.82E-11 | 26525     |
| ICE1         | 0.31348  | 3.82E-11 | 23379     |
| PPHLN1       | 0.313442 | 3.84E-11 | 51535     |
| ZBTB2        | 0.313393 | 3.87E-11 | 57621     |
| HELB         | 0.313354 | 3.89E-11 | 92797     |
| SLC35E3      | 0.313295 | 3.93E-11 | 55508     |
| GJB6         | 0.313282 | 3.94E-11 | 10804     |
| ANKRD12      | 0.313181 | 4.00E-11 | 23253     |
| DPY19L3      | 0.313153 | 4.01E-11 | 147991    |
| CALD1        | 0.313046 | 4.08E-11 | 800       |
| SERINC1      | 0.312964 | 4.13E-11 | 57515     |
| TMEM221      | 0.312914 | 4.16E-11 | 100130519 |
| GYPE         | 0.312912 | 4.16E-11 | 2996      |
| SWT1         | 0.312872 | 4.18E-11 | 54823     |

|              |          |          |    |        |
|--------------|----------|----------|----|--------|
| NOTCH2NL     | 0.312762 | 4.25E-11 | NA |        |
| TNPO1        | 0.312739 | 4.27E-11 |    | 3842   |
| ZNF207       | 0.31264  | 4.33E-11 |    | 7756   |
| GTF2H1       | 0.312626 | 4.34E-11 |    | 2965   |
| RP11-244H3.4 | 0.312548 | 4.39E-11 | NA |        |
| LHCGR        | 0.312518 | 4.41E-11 |    | 3973   |
| YIPF5        | 0.312476 | 4.44E-11 |    | 81555  |
| CRY1         | 0.31243  | 4.47E-11 |    | 1407   |
| SLCO5A1      | 0.312384 | 4.50E-11 |    | 81796  |
| ATP1A4       | 0.312359 | 4.52E-11 |    | 480    |
| N4BP2        | 0.312324 | 4.54E-11 |    | 55728  |
| FAM179B      | 0.31232  | 4.55E-11 | NA |        |
| RAB30        | 0.31231  | 4.55E-11 |    | 27314  |
| KLHL2        | 0.312248 | 4.59E-11 |    | 11275  |
| PLEKHM3      | 0.31224  | 4.60E-11 |    | 389072 |
| NSRP1        | 0.312117 | 4.68E-11 |    | 84081  |
| KRT13        | 0.312104 | 4.69E-11 |    | 3860   |
| RNF149       | 0.312099 | 4.70E-11 |    | 284996 |
| SLC27A1      | 0.31198  | 4.78E-11 |    | 376497 |
| TBCK         | 0.311974 | 4.79E-11 |    | 93627  |
| CCDC90B      | 0.31197  | 4.79E-11 |    | 60492  |
| PBRM1        | 0.311964 | 4.79E-11 |    | 55193  |
| MPZL1        | 0.311938 | 4.81E-11 |    | 9019   |
| PHACTR2      | 0.311883 | 4.85E-11 |    | 9749   |
| ZSCAN20      | 0.311785 | 4.92E-11 |    | 7579   |
| HCST         | 0.311757 | 4.94E-11 |    | 10870  |
| SBSN         | 0.31163  | 5.04E-11 |    | 374897 |
| IFT80        | 0.311614 | 5.05E-11 |    | 57560  |
| YIPF4        | 0.311607 | 5.06E-11 |    | 84272  |
| TGM1         | 0.311566 | 5.09E-11 |    | 7051   |
| FXR1         | 0.31155  | 5.10E-11 |    | 8087   |
| TIGIT        | 0.311518 | 5.12E-11 |    | 201633 |
| PRRC1        | 0.311498 | 5.14E-11 |    | 133619 |
| DOCK1        | 0.311497 | 5.14E-11 |    | 1793   |
| MGA          | 0.311495 | 5.14E-11 |    | 23269  |
| THAP2        | 0.311482 | 5.15E-11 |    | 83591  |
| MGEA5        | 0.31144  | 5.18E-11 | NA |        |
| ARHGAP10     | 0.31133  | 5.27E-11 |    | 79658  |
| ZFP37        | 0.311328 | 5.27E-11 |    | 7539   |
| SLC26A10     | 0.311262 | 5.32E-11 |    | 65012  |
| 5-3月         | 0.311226 | 5.35E-11 | NA |        |
| RUNX3        | 0.311208 | 5.37E-11 |    | 864    |
| RAPH1        | 0.311192 | 5.38E-11 |    | 65059  |
| ADAM20       | 0.311118 | 5.44E-11 |    | 8748   |
| STAC         | 0.311089 | 5.46E-11 |    | 6769   |
| RBAK         | 0.311046 | 5.50E-11 |    | 57786  |
| PRKAB2       | 0.311038 | 5.50E-11 |    | 5565   |
| CWF19L2      | 0.310996 | 5.54E-11 |    | 143884 |
| ZNF770       | 0.310985 | 5.55E-11 |    | 54989  |
| ZMYND11      | 0.31096  | 5.57E-11 |    | 10771  |
| TWISTNB      | 0.310862 | 5.65E-11 | NA |        |
| MTPN         | 0.310794 | 5.71E-11 |    | 136319 |
| CTSF         | 0.310769 | 5.73E-11 |    | 8722   |
| PCNXL2       | 0.31069  | 5.79E-11 | NA |        |
| SDAD1        | 0.310666 | 5.82E-11 |    | 55153  |
| UBE2QL1      | 0.310632 | 5.84E-11 |    | 134111 |
| PTPN11       | 0.31062  | 5.86E-11 |    | 5781   |
| CYP27B1      | 0.310526 | 5.94E-11 |    | 1594   |
| ATAD2B       | 0.310468 | 5.99E-11 |    | 54454  |
| DCUN1D1      | 0.310374 | 6.07E-11 |    | 54165  |



|               |          |             |        |
|---------------|----------|-------------|--------|
| TTC39C        | 0.310359 | 6.09E-11    | 125488 |
| KRR1          | 0.310356 | 6.09E-11    | 11103  |
| KIF27         | 0.310347 | 6.10E-11    | 55582  |
| KRT6C         | 0.310305 | 6.14E-11    | 286887 |
| KLHL3         | 0.310246 | 6.19E-11    | 26249  |
| SIPA1         | 0.310141 | 6.29E-11    | 6494   |
| CHML          | 0.31008  | 6.34E-11    | 1122   |
| IL18BP        | 0.310059 | 6.36E-11    | 10068  |
| CYP2U1        | 0.310054 | 6.37E-11    | 113612 |
| UBASH3B       | 0.310033 | 6.39E-11    | 84959  |
| DYNC1I2       | 0.30998  | 6.44E-11    | 1781   |
| RABGAP1       | 0.309946 | 6.47E-11    | 23637  |
| CD44          | 0.309915 | 6.50E-11    | 960    |
| TNRC6B        | 0.309909 | 6.51E-11    | 23112  |
| R3HCC1L       | 0.309909 | 6.51E-11    | 27291  |
| TFE3          | 0.309811 | 6.60E-11    | 7030   |
| FSD2          | 0.30981  | 6.60E-11    | 123722 |
| EFCAB7        | 0.309781 | 6.63E-11    | 84455  |
| BAG4          | 0.309698 | 6.71E-11    | 9530   |
| KRTDAP        | 0.309594 | 6.82E-11    | 388533 |
| UPF2          | 0.309593 | 6.82E-11    | 26019  |
| KBTBD2        | 0.309567 | 6.84E-11    | 25948  |
| PAK2          | 0.309552 | 6.86E-11    | 5062   |
| MEIS1         | 0.309536 | 6.88E-11    | 4211   |
| EVI2B         | 0.309528 | 6.88E-11    | 2124   |
| SLCO1B7       | 0.309515 | 6.90E-11    | 338821 |
| PTPN4         | 0.309486 | 6.93E-11    | 5775   |
| SEN6          | 0.30948  | 6.93E-11    | 26054  |
| INTU          | 0.309429 | 6.98E-11    | 27152  |
| CNTN6         | 0.309428 | 6.99E-11    | 27255  |
| YBX3          | 0.309427 | 6.99E-11    | 8531   |
| HABP4         | 0.309412 | 7.00E-11    | 22927  |
| FGF11         | 0.309398 | 7.02E-11    | 2256   |
| CEBPB         | 0.309279 | 7.14E-11    | 1051   |
| SBF2          | 0.309245 | 7.18E-11    | 81846  |
| C16orf70      | 0.309092 | 7.34E-11    | 80262  |
| RP11-219A15.1 | 0.309088 | 7.35E-11 NA |        |
| TBK1          | 0.309056 | 7.38E-11    | 29110  |
| PML           | 0.30902  | 7.42E-11    | 5371   |
| INO80D        | 0.308995 | 7.45E-11    | 54891  |
| DDX6          | 0.308955 | 7.49E-11    | 1656   |
| CCR4          | 0.308913 | 7.54E-11    | 1233   |
| VPS13C        | 0.30891  | 7.54E-11    | 54832  |
| TM2D1         | 0.308818 | 7.65E-11    | 83941  |
| ARMC1         | 0.308791 | 7.68E-11    | 55156  |
| BHLHE40       | 0.308747 | 7.73E-11    | 8553   |
| MTAP          | 0.308718 | 7.76E-11    | 4507   |
| ZSCAN2        | 0.308674 | 7.81E-11    | 54993  |
| NCEH1         | 0.308592 | 7.90E-11    | 57552  |
| IFI44L        | 0.308571 | 7.93E-11    | 10964  |
| ACTA2         | 0.308563 | 7.94E-11    | 59     |
| C11orf30      | 0.308536 | 7.97E-11 NA |        |
| ANKRD40       | 0.308519 | 7.99E-11    | 91369  |
| ZNF431        | 0.308497 | 8.01E-11    | 170959 |
| GATSL2        | 0.308496 | 8.02E-11 NA |        |
| RCBTB1        | 0.308416 | 8.11E-11    | 55213  |
| VSIG10L       | 0.308394 | 8.14E-11    | 147645 |
| CCDC91        | 0.308348 | 8.19E-11    | 55297  |
| ATXN7L1       | 0.308337 | 8.21E-11    | 222255 |
| AASDHPPT      | 0.30831  | 8.24E-11    | 60496  |

|              |          |          |             |
|--------------|----------|----------|-------------|
| TMEM167A     | 0.308226 | 8.34E-11 | 153339      |
| KCNAB2       | 0.308041 | 8.57E-11 | 8514        |
| RASSF9       | 0.308029 | 8.59E-11 | 9182        |
| SLC9B1       | 0.307985 | 8.64E-11 | 150159      |
| SLC29A3      | 0.307981 | 8.65E-11 | 55315       |
| ERC1         | 0.307921 | 8.72E-11 | 23085       |
| MACC1        | 0.307902 | 8.75E-11 | 346389      |
| ZNF609       | 0.307897 | 8.76E-11 | 23060       |
| CEP57L1      | 0.307887 | 8.77E-11 | 285753      |
| RBBP6        | 0.307878 | 8.78E-11 | 5930        |
| TRAF6        | 0.307791 | 8.89E-11 | 7189        |
| TMEM200B     | 0.307773 | 8.92E-11 | 399474      |
| MAN1C1       | 0.307753 | 8.94E-11 | 57134       |
| KRT6A        | 0.307746 | 8.95E-11 | 3853        |
| EXTL1        | 0.307714 | 8.99E-11 | 2134        |
| GABPB1       | 0.307584 | 9.17E-11 | 2553        |
| DDHD2        | 0.30758  | 9.17E-11 | 23259       |
| RAI1         | 0.307568 | 9.19E-11 | 10743       |
| SYNGAP1      | 0.307511 | 9.27E-11 | 8831        |
| FPGT-TNNI3K  | 0.307506 | 9.27E-11 | 100526835   |
| TRIP11       | 0.307493 | 9.29E-11 | 9321        |
| KPNA6        | 0.307489 | 9.30E-11 | 23633       |
| TRIP12       | 0.307461 | 9.33E-11 | 9320        |
| PPP3CC       | 0.307447 | 9.35E-11 | 5533        |
| ATP6AP2      | 0.307446 | 9.35E-11 | 10159       |
| IFFO2        | 0.307397 | 9.42E-11 | 126917      |
| AP4E1        | 0.307361 | 9.47E-11 | 23431       |
| FER          | 0.307355 | 9.48E-11 | 2241        |
|              | 5-9月     | 0.307258 | 9.62E-11 NA |
| S100A12      | 0.307199 | 9.70E-11 | 6283        |
| ZNF433       | 0.307186 | 9.72E-11 | 163059      |
| CEP128       | 0.307158 | 9.76E-11 | 145508      |
| TREML4       | 0.307114 | 9.82E-11 | 285852      |
| G2E3         | 0.307086 | 9.86E-11 | 55632       |
| PRRC2C       | 0.306993 | 1.00E-10 | 23215       |
| ARHGAP25     | 0.306975 | 1.00E-10 | 9938        |
| ARHGEF12     | 0.306929 | 1.01E-10 | 23365       |
| PCDHGB6      | 0.306901 | 1.01E-10 | 56100       |
| RBMXL1       | 0.306875 | 1.02E-10 | 494115      |
| TANGO6       | 0.306868 | 1.02E-10 | 79613       |
| FAM208B      | 0.306836 | 1.02E-10 | NA          |
| INVS         | 0.306827 | 1.02E-10 | 27130       |
| ORAI2        | 0.306651 | 1.05E-10 | 80228       |
| TERF2IP      | 0.306647 | 1.05E-10 | 54386       |
| LRP2BP       | 0.306611 | 1.06E-10 | 55805       |
| FCGR3B       | 0.306598 | 1.06E-10 | 2215        |
|              | 2-9月     | 0.306545 | 1.07E-10 NA |
| APPBP2       | 0.306531 | 1.07E-10 | 10513       |
| ADAM22       | 0.306481 | 1.08E-10 | 53616       |
| FGF2         | 0.306479 | 1.08E-10 | 2247        |
| FES          | 0.306239 | 1.12E-10 | 2242        |
| MYO9A        | 0.306231 | 1.12E-10 | 4649        |
| RNF111       | 0.306195 | 1.12E-10 | 54778       |
| CHIC2        | 0.306186 | 1.12E-10 | 26511       |
| PRSS35       | 0.306107 | 1.14E-10 | 167681      |
| GNA15        | 0.306085 | 1.14E-10 | 2769        |
| CTC-487M23.8 | 0.305992 | 1.16E-10 | NA          |
| FNIP1        | 0.305956 | 1.16E-10 | 96459       |
| PCDH18       | 0.305912 | 1.17E-10 | 54510       |
| LCP1         | 0.305891 | 1.17E-10 | 3936        |

|              |          |             |        |
|--------------|----------|-------------|--------|
| ZNF146       | 0.305883 | 1.18E-10    | 7705   |
| EPC2         | 0.30584  | 1.18E-10    | 26122  |
| AC087350.1   | 0.305815 | 1.19E-10 NA |        |
| WASF1        | 0.305783 | 1.19E-10    | 8936   |
| ODF2L        | 0.305755 | 1.20E-10    | 57489  |
| ANKLE2       | 0.305742 | 1.20E-10    | 23141  |
| GRASP        | 0.305648 | 1.22E-10 NA |        |
| MTMR6        | 0.305617 | 1.22E-10    | 9107   |
| TMEM79       | 0.305601 | 1.23E-10    | 84283  |
| B3GNT2       | 0.305589 | 1.23E-10    | 10678  |
| ZNF426       | 0.305564 | 1.23E-10    | 79088  |
| TRPC5        | 0.305541 | 1.24E-10    | 7224   |
| ZNF507       | 0.305524 | 1.24E-10    | 22847  |
| MYO1B        | 0.30552  | 1.24E-10    | 4430   |
| TMEM65       | 0.305487 | 1.25E-10    | 157378 |
| LAPTM4A      | 0.305374 | 1.27E-10    | 9741   |
| CRCT1        | 0.305368 | 1.27E-10    | 54544  |
| SCAF8        | 0.30531  | 1.28E-10    | 22828  |
| FAM127A      | 0.305276 | 1.28E-10 NA |        |
| FAM78A       | 0.30523  | 1.29E-10    | 286336 |
| SPOCK2       | 0.305222 | 1.29E-10    | 9806   |
| FAM76B       | 0.305221 | 1.29E-10    | 143684 |
| DDX21        | 0.305164 | 1.31E-10    | 9188   |
| RRM2B        | 0.30514  | 1.31E-10    | 50484  |
| SLAMF9       | 0.30507  | 1.32E-10    | 89886  |
| KDELC2       | 0.305062 | 1.33E-10 NA |        |
| CEP350       | 0.304974 | 1.34E-10    | 9857   |
| NIPBL        | 0.304912 | 1.35E-10    | 25836  |
| NFATC4       | 0.304886 | 1.36E-10    | 4776   |
| GRB10        | 0.304871 | 1.36E-10    | 2887   |
| NEK11        | 0.304853 | 1.37E-10    | 79858  |
| SH3RF3       | 0.30485  | 1.37E-10    | 344558 |
| CNOT6        | 0.304814 | 1.37E-10    | 57472  |
| PTBP2        | 0.304811 | 1.37E-10    | 58155  |
| SHPRH        | 0.304778 | 1.38E-10    | 257218 |
| SETX         | 0.304774 | 1.38E-10    | 23064  |
| CTD-2370N5.3 | 0.304766 | 1.38E-10 NA |        |
| NBPF9        | 0.304763 | 1.38E-10    | 400818 |
| ZNF638       | 0.304682 | 1.40E-10    | 27332  |
| MTX3         | 0.304566 | 1.42E-10    | 345778 |
| C11orf58     | 0.30453  | 1.43E-10    | 10944  |
| CANX         | 0.304491 | 1.44E-10    | 821    |
| METTL6       | 0.304453 | 1.45E-10    | 131965 |
| MAPKBP1      | 0.304452 | 1.45E-10    | 23005  |
| KLHL21       | 0.304445 | 1.45E-10    | 9903   |
| PKD2L2       | 0.304441 | 1.45E-10    | 27039  |
| COX4I2       | 0.304431 | 1.45E-10    | 84701  |
| TBC1D8B      | 0.304425 | 1.45E-10    | 54885  |
| USP6NL       | 0.3044   | 1.46E-10    | 9712   |
| TUBA1A       | 0.304377 | 1.46E-10    | 7846   |
| DLGAP4       | 0.304334 | 1.47E-10    | 22839  |
| ATF6         | 0.304331 | 1.47E-10    | 22926  |
| SREK1        | 0.304286 | 1.48E-10    | 140890 |
| CNOT2        | 0.304238 | 1.49E-10    | 4848   |
| FAM49B       | 0.304215 | 1.50E-10 NA |        |
| ARID4A       | 0.304199 | 1.50E-10    | 5926   |
| RRAGD        | 0.304183 | 1.51E-10    | 58528  |
| ZC3H11A      | 0.30403  | 1.54E-10    | 9877   |
| JAKMP1       | 0.304012 | 1.54E-10    | 152789 |
| KANSL1       | 0.304004 | 1.55E-10    | 284058 |

|               |          |             |        |
|---------------|----------|-------------|--------|
| GBP6          | 0.303981 | 1.55E-10    | 163351 |
| KLK9          | 0.303979 | 1.55E-10    | 284366 |
| C3orf17       | 0.303933 | 1.56E-10 NA |        |
| CRNN          | 0.303823 | 1.59E-10    | 49860  |
| ZC3H6         | 0.303791 | 1.59E-10    | 376940 |
| PPIL4         | 0.30377  | 1.60E-10    | 85313  |
| ITPR2         | 0.303716 | 1.61E-10    | 3709   |
| LRRFIP1       | 0.303703 | 1.61E-10    | 9208   |
| MYO16         | 0.303614 | 1.63E-10    | 23026  |
| FCRL6         | 0.303569 | 1.65E-10    | 343413 |
| CXCR4         | 0.303474 | 1.67E-10    | 7852   |
| KIAA1328      | 0.303449 | 1.67E-10    | 57536  |
| NRIP3         | 0.303449 | 1.67E-10    | 56675  |
| CCDC39        | 0.303415 | 1.68E-10    | 339829 |
| MARK4         | 0.303335 | 1.70E-10    | 57787  |
| DDX17         | 0.303329 | 1.70E-10    | 10521  |
| ZNF654        | 0.303323 | 1.70E-10    | 55279  |
| FAM13B        | 0.303265 | 1.72E-10    | 51306  |
| PLEKHM2       | 0.303258 | 1.72E-10    | 23207  |
| EPC1          | 0.303251 | 1.72E-10    | 80314  |
| CEP68         | 0.30325  | 1.72E-10    | 23177  |
| LRRC37B       | 0.303247 | 1.72E-10    | 114659 |
| RAB22A        | 0.303183 | 1.74E-10    | 57403  |
| BCLAF1        | 0.303145 | 1.75E-10    | 9774   |
| CNOT4         | 0.303131 | 1.75E-10    | 4850   |
| KDM5B         | 0.303105 | 1.76E-10    | 10765  |
| GJB4          | 0.303089 | 1.76E-10    | 127534 |
| RC3H1         | 0.30308  | 1.77E-10    | 149041 |
| LCE3D         | 0.303047 | 1.77E-10    | 84648  |
| RGS3          | 0.303039 | 1.78E-10    | 5998   |
| VEGFB         | 0.303036 | 1.78E-10    | 7423   |
| SARNP         | 0.303029 | 1.78E-10    | 84324  |
| IVL           | 0.30302  | 1.78E-10    | 3713   |
| ZFP28         | 0.30296  | 1.80E-10    | 140612 |
| DNAH11        | 0.302935 | 1.80E-10    | 8701   |
| RP11-286N22.8 | 0.302912 | 1.81E-10 NA |        |
| KCTD15        | 0.30288  | 1.82E-10    | 79047  |
| MTFR1         | 0.302828 | 1.83E-10    | 9650   |
| MEF2C         | 0.3028   | 1.84E-10    | 4208   |
| ANKRD26       | 0.302771 | 1.85E-10    | 22852  |
| RASSF5        | 0.302697 | 1.87E-10    | 83593  |
| CLUAP1        | 0.302668 | 1.87E-10    | 23059  |
| C19orf44      | 0.302643 | 1.88E-10    | 84167  |
| IQSEC3        | 0.302592 | 1.89E-10    | 440073 |
| BDP1          | 0.302578 | 1.90E-10    | 55814  |
| APLF          | 0.302578 | 1.90E-10    | 200558 |
| CHRM3         | 0.302556 | 1.90E-10    | 1131   |
| GATAD2B       | 0.302472 | 1.93E-10    | 57459  |
| SPRTN         | 0.302434 | 1.94E-10    | 83932  |
| BTA1F1        | 0.30238  | 1.95E-10    | 9044   |
| YWHAH         | 0.302377 | 1.95E-10    | 7533   |
| STAT5B        | 0.302327 | 1.97E-10    | 6777   |
| KRT78         | 0.302262 | 1.99E-10    | 196374 |
| DTX3L         | 0.302259 | 1.99E-10    | 151636 |
| PDP1          | 0.302254 | 1.99E-10    | 54704  |
| SPRR2B        | 0.302251 | 1.99E-10    | 6701   |
| ATP6V1B2      | 0.302193 | 2.01E-10    | 526    |
| SEC23IP       | 0.302152 | 2.02E-10    | 11196  |
| SSH2          | 0.302146 | 2.02E-10    | 85464  |
| CUL4B         | 0.302119 | 2.03E-10    | 8450   |

|           |          |             |        |
|-----------|----------|-------------|--------|
| PTBP3     | 0.302043 | 2.05E-10    | 9991   |
| MED13L    | 0.302027 | 2.06E-10    | 23389  |
| GLG1      | 0.301935 | 2.08E-10    | 2734   |
| KIAA1467  | 0.301933 | 2.08E-10 NA |        |
| UBA6      | 0.301917 | 2.09E-10    | 55236  |
| NLRP1     | 0.301865 | 2.10E-10    | 22861  |
| DCAF10    | 0.301856 | 2.11E-10    | 79269  |
| SAMD4B    | 0.301835 | 2.11E-10    | 55095  |
| RASGEF1B  | 0.301824 | 2.12E-10    | 153020 |
| KLHL18    | 0.301813 | 2.12E-10    | 23276  |
| ZNF286B   | 0.301721 | 2.15E-10    | 729288 |
| KRT14     | 0.301705 | 2.15E-10    | 3861   |
| PARP15    | 0.301662 | 2.17E-10    | 165631 |
| HELQ      | 0.301617 | 2.18E-10    | 113510 |
| SERPINB13 | 0.301608 | 2.18E-10    | 5275   |
| CCDC102A  | 0.301596 | 2.19E-10    | 92922  |
| PJA1      | 0.301585 | 2.19E-10    | 64219  |
| ARRB2     | 0.30157  | 2.19E-10    | 409    |
| SEMA4C    | 0.301569 | 2.19E-10    | 54910  |
| ALG10B    | 0.301472 | 2.23E-10    | 144245 |
| TBC1D23   | 0.301438 | 2.24E-10    | 55773  |
| ARSK      | 0.301433 | 2.24E-10    | 153642 |
| BRMS1L    | 0.301426 | 2.24E-10    | 84312  |
| WTAP      | 0.301392 | 2.25E-10    | 9589   |
| NIPSNAP3B | 0.301377 | 2.26E-10    | 55335  |
| NKX3-2    | 0.30137  | 2.26E-10    | 579    |
| TM4SF1    | 0.301368 | 2.26E-10    | 4071   |
| NUP153    | 0.301357 | 2.26E-10    | 9972   |
| BHLHB9    | 0.30133  | 2.27E-10    | 80823  |
| SLC4A1AP  | 0.301324 | 2.27E-10    | 22950  |
| PALB2     | 0.301309 | 2.28E-10    | 79728  |
| ZNF728    | 0.301248 | 2.30E-10    | 388523 |
| DNAJB14   | 0.30117  | 2.32E-10    | 79982  |
| RSU1      | 0.301098 | 2.35E-10    | 6251   |
| LMLN      | 0.301051 | 2.36E-10    | 89782  |
| BHLHE41   | 0.301    | 2.38E-10    | 79365  |
| MERTK     | 0.300985 | 2.39E-10    | 10461  |
| SIN3B     | 0.300972 | 2.39E-10    | 23309  |
| LDLRAD4   | 0.300898 | 2.42E-10    | 753    |
| GLB1L     | 0.300849 | 2.43E-10    | 79411  |
| FAM122C   | 0.300772 | 2.46E-10    | 159091 |
| MLLT10    | 0.300684 | 2.49E-10    | 8028   |
| POU2F1    | 0.300665 | 2.50E-10    | 5451   |
| ARL5A     | 0.300589 | 2.53E-10    | 26225  |
| KRT5      | 0.30057  | 2.53E-10    | 3852   |
| NT5C2     | 0.300517 | 2.55E-10    | 22978  |
| LEF1      | 0.300511 | 2.55E-10    | 51176  |
| USP37     | 0.30051  | 2.55E-10    | 57695  |
| UBXN2B    | 0.300508 | 2.55E-10    | 137886 |
| TMEM200A  | 0.300493 | 2.56E-10    | 114801 |
| UBFD1     | 0.300375 | 2.60E-10    | 56061  |
| ITSN2     | 0.300362 | 2.61E-10    | 50618  |
| UHRF1BP1  | 0.300337 | 2.62E-10    | 54887  |
| AEBP2     | 0.300297 | 2.63E-10    | 121536 |
| SEL1L     | 0.300247 | 2.65E-10    | 6400   |
| WAS       | 0.300188 | 2.67E-10    | 7454   |
| SPRR2E    | 0.300116 | 2.70E-10    | 6704   |
| MAP1A     | 0.300056 | 2.73E-10    | 4130   |
| NRBP1     | 0.300052 | 2.73E-10    | 29959  |
| C2orf49   | 0.299895 | 2.79E-10    | 79074  |

|                 |          |             |        |
|-----------------|----------|-------------|--------|
| SLC5A3          | 0.299887 | 2.79E-10    | 6526   |
| KIAA0430        | 0.299873 | 2.80E-10 NA |        |
| AGO2            | 0.299866 | 2.80E-10    | 27161  |
| BHMT2           | 0.299865 | 2.80E-10    | 23743  |
| CYSRT1          | 0.299788 | 2.83E-10    | 375791 |
| PLCB2           | 0.299742 | 2.85E-10    | 5330   |
| IPO7            | 0.299711 | 2.86E-10    | 10527  |
| MANEA           | 0.2997   | 2.87E-10    | 79694  |
| LYN             | 0.299698 | 2.87E-10    | 4067   |
| PIM1            | 0.299589 | 2.91E-10    | 5292   |
| TLDC1           | 0.299453 | 2.97E-10 NA |        |
| HERC1           | 0.299419 | 2.98E-10    | 8925   |
| IFIT3           | 0.299414 | 2.99E-10    | 3437   |
| EYA3            | 0.299393 | 3.00E-10    | 2140   |
| EXOC2           | 0.299383 | 3.00E-10    | 55770  |
| AP3S1           | 0.299363 | 3.01E-10    | 1176   |
| DCUN1D4         | 0.299216 | 3.07E-10    | 23142  |
| RAP2C           | 0.299072 | 3.14E-10    | 57826  |
| JMY             | 0.299021 | 3.16E-10    | 133746 |
| TNFSF12-TNFSF13 | 0.299021 | 3.16E-10    | 407977 |
| SLC23A2         | 0.299005 | 3.17E-10    | 9962   |
| FBXL13          | 0.29895  | 3.19E-10    | 222235 |
| CFAP69          | 0.298915 | 3.21E-10    | 79846  |
| C10orf88        | 0.298753 | 3.28E-10    | 80007  |
| CYB5R3          | 0.298701 | 3.30E-10    | 1727   |
| ZC3H7A          | 0.2987   | 3.31E-10    | 29066  |
| LETM2           | 0.298657 | 3.33E-10    | 137994 |
| NEXN            | 0.298625 | 3.34E-10    | 91624  |
| MCF2L2          | 0.298562 | 3.37E-10    | 23101  |
| JAK2            | 0.298472 | 3.41E-10    | 3717   |
| FBXO33          | 0.298463 | 3.42E-10    | 254170 |
| HRH1            | 0.298445 | 3.43E-10    | 3269   |
| ASH1L           | 0.298416 | 3.44E-10    | 55870  |
| ARHGAP5         | 0.298411 | 3.44E-10    | 394    |
| GRIN2B          | 0.298407 | 3.45E-10    | 2904   |
| SSR1            | 0.298387 | 3.46E-10    | 6745   |
| GAPVD1          | 0.298382 | 3.46E-10    | 26130  |
| ARID5A          | 0.298377 | 3.46E-10    | 10865  |
| AKAP11          | 0.298351 | 3.47E-10    | 11215  |
| ST8SIA1         | 0.298332 | 3.48E-10    | 6489   |
| PDS5B           | 0.298331 | 3.48E-10    | 23047  |
| VOPP1           | 0.298315 | 3.49E-10    | 81552  |
| STAT4           | 0.298293 | 3.50E-10    | 6775   |
| ADAT1           | 0.298288 | 3.50E-10    | 23536  |
| B3GALNT2        | 0.298286 | 3.50E-10    | 148789 |
| GON4L           | 0.298276 | 3.51E-10    | 54856  |
| TANC1           | 0.298151 | 3.57E-10    | 85461  |
| ZFP69B          | 0.298124 | 3.59E-10    | 65243  |
| SMARCD3         | 0.298122 | 3.59E-10    | 6604   |
| ZBTB6           | 0.298102 | 3.60E-10    | 10773  |
| ARRDC2          | 0.298072 | 3.61E-10    | 27106  |
| TBC1D5          | 0.298036 | 3.63E-10    | 9779   |
| ARHGAP22        | 0.298019 | 3.64E-10    | 58504  |
| TMEM194B        | 0.298007 | 3.65E-10 NA |        |
| ZNF254          | 0.297939 | 3.68E-10    | 9534   |
| RASA2           | 0.297933 | 3.68E-10    | 5922   |
| SPRR1B          | 0.297883 | 3.71E-10    | 6699   |
| PAFAH1B2        | 0.297848 | 3.73E-10    | 5049   |
| PCDHGA11        | 0.297788 | 3.76E-10    | 56105  |
| METTL8          | 0.297765 | 3.77E-10    | 79828  |

|          |          |             |        |
|----------|----------|-------------|--------|
| LDB1     | 0.297746 | 3.78E-10    | 8861   |
| PHC2     | 0.29773  | 3.79E-10    | 1912   |
| TPTE2    | 0.297718 | 3.80E-10    | 93492  |
| TMEM117  | 0.297696 | 3.81E-10    | 84216  |
| IGF2R    | 0.297672 | 3.82E-10    | 3482   |
| CSF2RB   | 0.297602 | 3.86E-10    | 1439   |
| CCDC126  | 0.297598 | 3.86E-10    | 90693  |
| RABEP1   | 0.297574 | 3.88E-10    | 9135   |
| ZKSCAN5  | 0.297567 | 3.88E-10    | 23660  |
| RSPRY1   | 0.297537 | 3.90E-10    | 89970  |
| ZNF331   | 0.297536 | 3.90E-10    | 55422  |
| L3HYPDH  | 0.297517 | 3.91E-10    | 112849 |
| NHLRC4   | 0.297491 | 3.92E-10    | 283948 |
| CDK6     | 0.297437 | 3.95E-10    | 1021   |
| SPRR2D   | 0.297415 | 3.96E-10    | 6703   |
| NPAS3    | 0.297395 | 3.98E-10    | 64067  |
| LPP      | 0.297336 | 4.01E-10    | 4026   |
| THBS4    | 0.297334 | 4.01E-10    | 7060   |
| ZNF660   | 0.297333 | 4.01E-10    | 285349 |
| RAB21    | 0.297238 | 4.06E-10    | 23011  |
| NOC3L    | 0.297185 | 4.10E-10    | 64318  |
| ARF4     | 0.297165 | 4.11E-10    | 378    |
| CD302    | 0.297161 | 4.11E-10    | 9936   |
| TMEM233  | 0.297154 | 4.11E-10    | 387890 |
| ICAM2    | 0.297151 | 4.11E-10    | 3384   |
| ZNF131   | 0.297108 | 4.14E-10    | 7690   |
| MATR3    | 0.297105 | 4.14E-10    | 9782   |
| ZC3H13   | 0.297087 | 4.15E-10    | 23091  |
| KDSR     | 0.296937 | 4.24E-10    | 2531   |
| GLTSCR1L | 0.296921 | 4.25E-10 NA |        |
| CCM2L    | 0.296899 | 4.26E-10    | 140706 |
| CREBL2   | 0.29689  | 4.27E-10    | 1389   |
| SLC16A6  | 0.29687  | 4.28E-10    | 9120   |
| HIPK1    | 0.296793 | 4.33E-10    | 204851 |
| JAK1     | 0.296773 | 4.34E-10    | 3716   |
| DMP1     | 0.296639 | 4.42E-10    | 1758   |
| DYNC1LI2 | 0.296616 | 4.44E-10    | 1783   |
| RAB41    | 0.29661  | 4.44E-10    | 347517 |
| KPNA3    | 0.296592 | 4.45E-10    | 3839   |
| DLG2     | 0.296542 | 4.48E-10    | 1740   |
| MAP3K4   | 0.296527 | 4.49E-10    | 4216   |
| RBM12    | 0.296525 | 4.49E-10    | 10137  |
| ZNF410   | 0.29617  | 4.72E-10    | 57862  |
| TMEM169  | 0.296167 | 4.73E-10    | 92691  |
| ZNF548   | 0.296142 | 4.74E-10    | 147694 |
| CPSF6    | 0.295962 | 4.86E-10    | 11052  |
| TRIM13   | 0.295953 | 4.87E-10    | 10206  |
| INTS6    | 0.295904 | 4.90E-10    | 26512  |
| TSPAN10  | 0.295875 | 4.92E-10    | 83882  |
| SPATA12  | 0.295837 | 4.95E-10    | 353324 |
| INPP5B   | 0.295791 | 4.98E-10    | 3633   |
| RS1      | 0.295772 | 5.00E-10    | 6247   |
| WFDC5    | 0.295714 | 5.04E-10    | 149708 |
| MAGEL2   | 0.295674 | 5.07E-10    | 54551  |
| ZNF510   | 0.295661 | 5.07E-10    | 22869  |
| NMD3     | 0.295657 | 5.08E-10    | 51068  |
| CNOT6L   | 0.295588 | 5.13E-10    | 246175 |
| SPRR2A   | 0.29557  | 5.14E-10    | 6700   |
| YTHDF3   | 0.295494 | 5.19E-10    | 253943 |
| C11orf45 | 0.29549  | 5.20E-10    | 219833 |

|                |          |             |        |
|----------------|----------|-------------|--------|
| ZNF780A        | 0.295482 | 5.20E-10    | 284323 |
| ZNF236         | 0.29546  | 5.22E-10    | 7776   |
| RBP7           | 0.295454 | 5.22E-10    | 116362 |
| ARL14EP        | 0.295422 | 5.25E-10    | 120534 |
| XPR1           | 0.295415 | 5.25E-10    | 9213   |
| TMEM110-MUSTN1 | 0.295357 | 5.30E-10 NA |        |
| ZCCHC14        | 0.295353 | 5.30E-10    | 23174  |
| FBXO38         | 0.295302 | 5.34E-10    | 81545  |
| SPATS2         | 0.295284 | 5.35E-10    | 65244  |
| ERCC6L2        | 0.295253 | 5.37E-10    | 375748 |
| FAM228B        | 0.29523  | 5.39E-10    | 375190 |
| MFS7           | 0.295198 | 5.41E-10 NA |        |
| FAM216B        | 0.295192 | 5.42E-10    | 144809 |
| TMEM106B       | 0.295175 | 5.43E-10    | 54664  |
| AGFG1          | 0.295154 | 5.45E-10    | 3267   |
| ISPD           | 0.295151 | 5.45E-10 NA |        |
| TRDMT1         | 0.295094 | 5.49E-10    | 1787   |
| TLN1           | 0.295081 | 5.50E-10    | 7094   |
| ZNF713         | 0.295075 | 5.51E-10    | 349075 |
| PIK3R4         | 0.295047 | 5.53E-10    | 30849  |
| CERKL          | 0.295038 | 5.54E-10    | 375298 |
| SHE            | 0.294999 | 5.57E-10    | 126669 |
| ZNF644         | 0.29495  | 5.61E-10    | 84146  |
| ARHGDIB        | 0.294942 | 5.61E-10    | 397    |
| DHX57          | 0.294929 | 5.62E-10    | 90957  |
| TRAF3IP3       | 0.294811 | 5.72E-10    | 80342  |
| ZSCAN23        | 0.294767 | 5.75E-10    | 222696 |
| ZZZ3           | 0.294746 | 5.77E-10    | 26009  |
| C11orf63       | 0.294667 | 5.83E-10 NA |        |
| KIAA1549L      | 0.294652 | 5.84E-10    | 25758  |
| UHMK1          | 0.294638 | 5.86E-10    | 127933 |
| MYH1           | 0.294632 | 5.86E-10    | 4619   |
| ATP6V1A        | 0.294613 | 5.88E-10    | 523    |
| SIGLEC1        | 0.294593 | 5.89E-10    | 6614   |
| ZYG11B         | 0.294519 | 5.95E-10    | 79699  |
| CD200          | 0.294503 | 5.97E-10    | 4345   |
| FZD6           | 0.294494 | 5.97E-10    | 8323   |
| ATG4C          | 0.294492 | 5.98E-10    | 84938  |
| SIK2           | 0.294432 | 6.03E-10    | 23235  |
| SLC43A3        | 0.294376 | 6.07E-10    | 29015  |
| CEP290         | 0.294372 | 6.08E-10    | 80184  |
| KIAA1614       | 0.294363 | 6.09E-10    | 57710  |
| BLZF1          | 0.294248 | 6.18E-10    | 8548   |
| POLR2M         | 0.294233 | 6.20E-10    | 81488  |
| TMOD2          | 0.294228 | 6.20E-10    | 29767  |
| NAA25          | 0.294221 | 6.21E-10    | 80018  |
| PEX5L          | 0.29422  | 6.21E-10    | 51555  |
| ALOX5          | 0.294215 | 6.21E-10    | 240    |
| MAPRE2         | 0.29421  | 6.22E-10    | 10982  |
| CDC5L          | 0.29416  | 6.26E-10    | 988    |
| KANK3          | 0.294134 | 6.28E-10    | 256949 |
| ZBTB25         | 0.294088 | 6.32E-10    | 7597   |
| PGM3           | 0.294076 | 6.33E-10    | 5238   |
| CRTAP          | 0.293983 | 6.42E-10    | 10491  |
| KPNA4          | 0.293958 | 6.44E-10    | 3840   |
| PAK3           | 0.29395  | 6.45E-10    | 5063   |
| FAM149B1       | 0.293933 | 6.46E-10    | 317662 |
| TTF1           | 0.293925 | 6.47E-10    | 7270   |
| TLL1           | 0.29392  | 6.47E-10    | 25809  |
| TTC9           | 0.293905 | 6.49E-10    | 23508  |



|             |          |          |           |
|-------------|----------|----------|-----------|
| BIRC2       | 0.293874 | 6.51E-10 | 329       |
| PDE4DIP     | 0.293856 | 6.53E-10 | 9659      |
| HBS1L       | 0.293835 | 6.55E-10 | 10767     |
| SH3BGRL     | 0.293787 | 6.59E-10 | 6451      |
| ZNF225      | 0.293763 | 6.62E-10 | 7768      |
| ZNF287      | 0.29374  | 6.64E-10 | 57336     |
| CCDC74A     | 0.293685 | 6.69E-10 | 90557     |
| SDC4        | 0.293511 | 6.85E-10 | 6385      |
| C2CD3       | 0.2935   | 6.86E-10 | 26005     |
| DCAF17      | 0.293381 | 6.98E-10 | 80067     |
| MEAF6       | 0.293332 | 7.03E-10 | 64769     |
| PLEKHA4     | 0.29333  | 7.03E-10 | 57664     |
| PHF6        | 0.293319 | 7.04E-10 | 84295     |
| BAZ1A       | 0.293303 | 7.05E-10 | 11177     |
| ZBTB38      | 0.293276 | 7.08E-10 | 253461    |
| ARL2BP      | 0.293245 | 7.11E-10 | 23568     |
| RAB3GAP1    | 0.293244 | 7.11E-10 | 22930     |
| STK4        | 0.293185 | 7.17E-10 | 6789      |
| PURB        | 0.293179 | 7.18E-10 | 5814      |
| STX17       | 0.293157 | 7.20E-10 | 55014     |
| CDR2        | 0.293152 | 7.20E-10 | 1039      |
| PTGFRN      | 0.293087 | 7.27E-10 | 5738      |
| TMEM170B    | 0.293073 | 7.28E-10 | 100113407 |
| WDR66       | 0.29307  | 7.28E-10 | NA        |
| WDFY4       | 0.293057 | 7.30E-10 | 57705     |
| PIK3C3      | 0.293009 | 7.35E-10 | 5289      |
| NDST3       | 0.293008 | 7.35E-10 | 9348      |
| BMPR1A      | 0.292971 | 7.39E-10 | 657       |
| MRVI1       | 0.292967 | 7.39E-10 | NA        |
| ZCCHC7      | 0.292966 | 7.39E-10 | 84186     |
| APOC4-APOC2 | 0.292954 | 7.40E-10 | 100533990 |
| KCNQ3       | 0.292924 | 7.43E-10 | 3786      |
| GMFG        | 0.292884 | 7.48E-10 | 9535      |
| ZRSR1       | 0.292869 | 7.49E-10 | NA        |
| AGRP        | 0.292779 | 7.59E-10 | 181       |
| NPC2        | 0.292714 | 7.65E-10 | 10577     |
| ATP11C      | 0.292709 | 7.66E-10 | 286410    |
| SLC31A2     | 0.292591 | 7.79E-10 | 1318      |
| FCF1        | 0.292571 | 7.81E-10 | 51077     |
| TNS2        | 0.292556 | 7.82E-10 | 23371     |
| USP49       | 0.292531 | 7.85E-10 | 25862     |
| TRNT1       | 0.292499 | 7.89E-10 | 51095     |
| FAM171A2    | 0.292476 | 7.91E-10 | 284069    |
| HNRNPR      | 0.292442 | 7.95E-10 | 10236     |
| CCAR1       | 0.292434 | 7.96E-10 | 55749     |
| NBPF12      | 0.29243  | 7.96E-10 | 149013    |
| GATSL3      | 0.292392 | 8.00E-10 | NA        |
| 7-3月        | 0.292337 | 8.07E-10 | NA        |
| CLCA2       | 0.292281 | 8.13E-10 | 9635      |
| MS4A6A      | 0.292278 | 8.13E-10 | 64231     |
| DOCK8       | 0.292277 | 8.13E-10 | 81704     |
| SON         | 0.292242 | 8.17E-10 | 6651      |
| ZNF668      | 0.292237 | 8.18E-10 | 79759     |
| NDST2       | 0.292164 | 8.26E-10 | 8509      |
| MCM9        | 0.292163 | 8.26E-10 | 254394    |
| IQUB        | 0.292102 | 8.33E-10 | 154865    |
| GPC1        | 0.292094 | 8.34E-10 | 2817      |
| FP325317.1  | 0.292079 | 8.36E-10 | NA        |
| TACSTD2     | 0.292057 | 8.38E-10 | 4070      |
| CRTAC1      | 0.292021 | 8.43E-10 | 55118     |

|         |          |          |        |
|---------|----------|----------|--------|
| CHD6    | 0.292014 | 8.43E-10 | 84181  |
| SPATA7  | 0.291889 | 8.58E-10 | 55812  |
| HSDL1   | 0.291881 | 8.59E-10 | 83693  |
| RNF38   | 0.291831 | 8.65E-10 | 152006 |
| CPNE3   | 0.291814 | 8.67E-10 | 8895   |
| CNTLN   | 0.291812 | 8.67E-10 | 54875  |
| GABRR2  | 0.291812 | 8.67E-10 | 2570   |
| RAD51B  | 0.291808 | 8.68E-10 | 5890   |
| FAM182B | 0.291784 | 8.71E-10 | 728882 |
| SIAH1   | 0.291652 | 8.87E-10 | 6477   |
| TMX4    | 0.291611 | 8.92E-10 | 56255  |
| HYAL2   | 0.291603 | 8.93E-10 | 8692   |
| RASL11B | 0.291603 | 8.93E-10 | 65997  |
| LAMB4   | 0.291511 | 9.04E-10 | 22798  |
| DESI2   | 0.291386 | 9.20E-10 | 51029  |
| NCDN    | 0.291369 | 9.22E-10 | 23154  |
| MKLN1   | 0.291324 | 9.28E-10 | 4289   |
| PARP9   | 0.291291 | 9.32E-10 | 83666  |
| PRRG1   | 0.291234 | 9.39E-10 | 5638   |
| ZMYM2   | 0.291231 | 9.40E-10 | 7750   |
| VPS8    | 0.291193 | 9.45E-10 | 23355  |
| PCYOX1  | 0.291173 | 9.47E-10 | 51449  |
| BTK     | 0.291151 | 9.50E-10 | 695    |
| ZNF568  | 0.291136 | 9.52E-10 | 374900 |
| LZTS2   | 0.291122 | 9.54E-10 | 84445  |
| CREBBP  | 0.291063 | 9.62E-10 | 1387   |
| TIA1    | 0.291035 | 9.65E-10 | 7072   |
| PUS7L   | 0.290961 | 9.75E-10 | 83448  |
| CD36    | 0.290946 | 9.77E-10 | 948    |
| YLPM1   | 0.290921 | 9.81E-10 | 56252  |
| WDR36   | 0.290915 | 9.81E-10 | 134430 |
| C4orf45 | 0.290851 | 9.90E-10 | 152940 |
| ST3GAL3 | 0.290842 | 9.91E-10 | 6487   |
| OAS3    | 0.290689 | 1.01E-09 | 4940   |
| ARNTL2  | 0.290681 | 1.01E-09 | 56938  |
| C3orf36 | 0.29067  | 1.02E-09 | 80111  |
| PSD3    | 0.29066  | 1.02E-09 | 23362  |
| TRPC4   | 0.290653 | 1.02E-09 | 7223   |
| WAC     | 0.290644 | 1.02E-09 | 51322  |
| ADAM21  | 0.29056  | 1.03E-09 | 8747   |
| MLH3    | 0.29048  | 1.04E-09 | 27030  |
| MYH13   | 0.290437 | 1.05E-09 | 8735   |
| DDX50   | 0.290394 | 1.05E-09 | 79009  |
| DLG5    | 0.290347 | 1.06E-09 | 9231   |
| LARP4   | 0.290264 | 1.07E-09 | 113251 |
| FLT3LG  | 0.290261 | 1.07E-09 | 2323   |
| ZNF175  | 0.290251 | 1.08E-09 | 7728   |
| ATP2C1  | 0.290245 | 1.08E-09 | 27032  |
| SEPN1   | 0.290228 | 1.08E-09 | NA     |
| RBM4    | 0.29019  | 1.08E-09 | 5936   |
| ZNF566  | 0.290151 | 1.09E-09 | 84924  |
| TFIP11  | 0.290132 | 1.09E-09 | 24144  |
| ZNF407  | 0.290124 | 1.09E-09 | 55628  |
| SP3     | 0.290111 | 1.10E-09 | 6670   |
| PHYHD1  | 0.290033 | 1.11E-09 | 254295 |
| SMAD2   | 0.290033 | 1.11E-09 | 4087   |
| EVA1A   | 0.290001 | 1.11E-09 | 84141  |
| TERF1   | 0.289996 | 1.11E-09 | 7013   |
| NAP1L1  | 0.289955 | 1.12E-09 | 4673   |
| RFX5    | 0.289939 | 1.12E-09 | 5993   |

|              |          |             |           |
|--------------|----------|-------------|-----------|
| CCDC66       | 0.28993  | 1.12E-09    | 285331    |
| ARFGAP3      | 0.289922 | 1.13E-09    | 26286     |
| SYNJ2        | 0.289904 | 1.13E-09    | 8871      |
| TBPL1        | 0.289897 | 1.13E-09    | 9519      |
| S100A7       | 0.289823 | 1.14E-09    | 6278      |
| AOC2         | 0.28976  | 1.15E-09    | 314       |
| AKNAD1       | 0.289737 | 1.15E-09    | 254268    |
| NSD1         | 0.289646 | 1.17E-09    | 64324     |
| PUM1         | 0.289622 | 1.17E-09    | 9698      |
| MEOX2        | 0.289622 | 1.17E-09    | 4223      |
| GTF2E1       | 0.289616 | 1.17E-09    | 2960      |
| DEPTOR       | 0.289615 | 1.17E-09    | 64798     |
| NRBF2        | 0.289586 | 1.18E-09    | 29982     |
| SUPT20H      | 0.289549 | 1.18E-09    | 55578     |
| ARHGAP21     | 0.289543 | 1.18E-09    | 57584     |
| UBR5         | 0.289533 | 1.19E-09    | 51366     |
| WEE2         | 0.289522 | 1.19E-09    | 494551    |
| PPP1R9B      | 0.289508 | 1.19E-09    | 84687     |
| PTGES        | 0.289502 | 1.19E-09    | 9536      |
| RAET1E       | 0.289476 | 1.20E-09    | 135250    |
| SF3B1        | 0.28944  | 1.20E-09    | 23451     |
| PTK2         | 0.289389 | 1.21E-09    | 5747      |
| TPR          | 0.289389 | 1.21E-09    | 7175      |
| CHM          | 0.289222 | 1.24E-09    | 1121      |
| NCALD        | 0.289086 | 1.26E-09    | 83988     |
| BRWD3        | 0.289071 | 1.26E-09    | 254065    |
| PLCL1        | 0.289061 | 1.27E-09    | 5334      |
| VTI1A        | 0.289058 | 1.27E-09    | 143187    |
| EDNRA        | 0.289048 | 1.27E-09    | 1909      |
| SPCS3        | 0.289035 | 1.27E-09    | 60559     |
| FAM227B      | 0.289019 | 1.27E-09    | 196951    |
| ATXN2        | 0.288928 | 1.29E-09    | 6311      |
| SLC35F3      | 0.288916 | 1.29E-09    | 148641    |
| YPEL1        | 0.288912 | 1.29E-09    | 29799     |
| EP300        | 0.288896 | 1.29E-09    | 2033      |
| CTD-3088G3.8 | 0.288848 | 1.30E-09 NA |           |
| GTF3C3       | 0.288843 | 1.30E-09    | 9330      |
| SRSF10       | 0.288838 | 1.30E-09    | 10772     |
| RHBDF2       | 0.288757 | 1.32E-09    | 79651     |
| SERPINB3     | 0.288734 | 1.32E-09    | 6317      |
| CARF         | 0.28873  | 1.32E-09    | 79800     |
| PTPRE        | 0.288696 | 1.33E-09    | 5791      |
| ZNF33A       | 0.28864  | 1.34E-09    | 7581      |
| MGAT1        | 0.288639 | 1.34E-09    | 4245      |
| FAM73A       | 0.288629 | 1.34E-09 NA |           |
| MREG         | 0.288481 | 1.37E-09    | 55686     |
| CHRNE        | 0.288479 | 1.37E-09    | 1145      |
| TRAF3IP1     | 0.288457 | 1.37E-09    | 26146     |
| PHF20        | 0.288418 | 1.38E-09    | 51230     |
| KLC1         | 0.288406 | 1.38E-09    | 3831      |
| RETN         | 0.288379 | 1.39E-09    | 56729     |
| JARID2       | 0.288366 | 1.39E-09    | 3720      |
| SLIT3        | 0.288363 | 1.39E-09    | 6586      |
| C3orf18      | 0.288353 | 1.39E-09    | 51161     |
| ACKR3        | 0.288345 | 1.40E-09    | 57007     |
| FEM1B        | 0.288344 | 1.40E-09    | 10116     |
| TRIM4        | 0.288344 | 1.40E-09    | 89122     |
| ZC3HAV1      | 0.288327 | 1.40E-09    | 56829     |
| SBK3         | 0.288288 | 1.41E-09    | 100130827 |
| NEK9         | 0.288258 | 1.41E-09    | 91754     |

|              |          |          |           |
|--------------|----------|----------|-----------|
| RP11-849F2.7 | 0.288216 | 1.42E-09 | NA        |
| NSMAF        | 0.288183 | 1.43E-09 | 8439      |
| CEP164       | 0.288143 | 1.43E-09 | 22897     |
| C5orf42      | 0.288013 | 1.46E-09 | NA        |
| PEAR1        | 0.287996 | 1.46E-09 | 375033    |
| ZMYM5        | 0.287976 | 1.47E-09 | 9205      |
| TYMP         | 0.287955 | 1.47E-09 | 1890      |
| ZNF829       | 0.287942 | 1.47E-09 | 374899    |
| PAIP1        | 0.287906 | 1.48E-09 | 10605     |
| RYK          | 0.287886 | 1.49E-09 | 6259      |
| C18orf54     | 0.287777 | 1.51E-09 | 162681    |
| RNF215       | 0.287773 | 1.51E-09 | 200312    |
| TUSC3        | 0.287768 | 1.51E-09 | 7991      |
| NDEL1        | 0.287764 | 1.51E-09 | 81565     |
| CCND1        | 0.287744 | 1.51E-09 | 595       |
| BRAF         | 0.287735 | 1.52E-09 | 673       |
| OGFOD1       | 0.287729 | 1.52E-09 | 55239     |
| TMF1         | 0.287706 | 1.52E-09 | 7110      |
| RSRC2        | 0.287688 | 1.53E-09 | 65117     |
| NOL8         | 0.287687 | 1.53E-09 | 55035     |
| RABGAP1L     | 0.287685 | 1.53E-09 | 9910      |
| NCOR2        | 0.287684 | 1.53E-09 | 9612      |
| MOB1A        | 0.28763  | 1.54E-09 | 55233     |
| CHUK         | 0.287617 | 1.54E-09 | 1147      |
| SMARCA5      | 0.287611 | 1.54E-09 | 8467      |
| GSK3B        | 0.287516 | 1.56E-09 | 2932      |
| MUC15        | 0.287515 | 1.56E-09 | 143662    |
| C8orf44-SGK3 | 0.287485 | 1.57E-09 | 100533105 |
| ANKRD34A     | 0.287457 | 1.57E-09 | 284615    |
| ZNF471       | 0.287298 | 1.61E-09 | 57573     |
| CTSH         | 0.287295 | 1.61E-09 | 1512      |
| ZNF214       | 0.287294 | 1.61E-09 | 7761      |
| ARCN1        | 0.287289 | 1.61E-09 | 372       |
| PAPLN        | 0.287185 | 1.63E-09 | 89932     |
| TP53INP1     | 0.287181 | 1.63E-09 | 94241     |
| FAM175A      | 0.287141 | 1.64E-09 | NA        |
| SPRR2G       | 0.287106 | 1.65E-09 | 6706      |
| TES          | 0.2871   | 1.65E-09 | 26136     |
| SEL1L2       | 0.287093 | 1.65E-09 | 80343     |
| C2orf42      | 0.287035 | 1.67E-09 | 54980     |
| UBE3D        | 0.287019 | 1.67E-09 | 90025     |
| CHD8         | 0.286992 | 1.68E-09 | 57680     |
| CNTRL        | 0.286964 | 1.68E-09 | 11064     |
| KDM3A        | 0.286899 | 1.70E-09 | 55818     |
| KIAA0586     | 0.286822 | 1.72E-09 | 9786      |
| CNEP1R1      | 0.286821 | 1.72E-09 | 255919    |
| PUM2         | 0.286757 | 1.73E-09 | 23369     |
| GPSM1        | 0.286709 | 1.74E-09 | 26086     |
| CCNT1        | 0.286706 | 1.74E-09 | 904       |
| UCN2         | 0.286701 | 1.75E-09 | 90226     |
| BLOC1S5      | 0.286665 | 1.75E-09 | 63915     |
| NOXRED1      | 0.286645 | 1.76E-09 | 122945    |
| RBM41        | 0.286515 | 1.79E-09 | 55285     |
| MDN1         | 0.286475 | 1.80E-09 | 23195     |
| CLEC4C       | 0.28646  | 1.80E-09 | 170482    |
| PCDHB4       | 0.286457 | 1.80E-09 | 56131     |
| RRP15        | 0.2864   | 1.82E-09 | 51018     |
| NFYA         | 0.286369 | 1.83E-09 | 4800      |
| MAGI2        | 0.286322 | 1.84E-09 | 9863      |
| SIPA1L1      | 0.286232 | 1.86E-09 | 26037     |

|                |          |             |           |
|----------------|----------|-------------|-----------|
| NPHP1          | 0.28622  | 1.86E-09    | 4867      |
| C9orf91        | 0.286218 | 1.86E-09 NA |           |
| FAM175B        | 0.286173 | 1.87E-09 NA |           |
| HGSNAT         | 0.286117 | 1.89E-09    | 138050    |
| FSCN1          | 0.286107 | 1.89E-09    | 6624      |
| CPA4           | 0.286086 | 1.90E-09    | 51200     |
| NINJ2          | 0.286045 | 1.91E-09    | 4815      |
| DDX24          | 0.285934 | 1.94E-09    | 57062     |
| ICK            | 0.285928 | 1.94E-09 NA |           |
| USP46          | 0.285876 | 1.95E-09    | 64854     |
| HLA-DPB1       | 0.285826 | 1.96E-09    | 3115      |
| ST5            | 0.285775 | 1.98E-09 NA |           |
| PIP4K2B        | 0.285729 | 1.99E-09    | 8396      |
| DEK            | 0.285685 | 2.00E-09    | 7913      |
| CELF1          | 0.285666 | 2.01E-09    | 10658     |
| CD40           | 0.285652 | 2.01E-09    | 958       |
| UBQLN2         | 0.285648 | 2.01E-09    | 29978     |
| ANGEL2         | 0.285604 | 2.02E-09    | 90806     |
| RPAP3          | 0.285553 | 2.04E-09    | 79657     |
| FAM196A        | 0.285533 | 2.04E-09 NA |           |
| FJX1           | 0.285513 | 2.05E-09    | 24147     |
| COMMD2         | 0.285485 | 2.06E-09    | 51122     |
| ZNF17          | 0.28536  | 2.09E-09    | 7565      |
| RBM25          | 0.285338 | 2.10E-09    | 58517     |
| TTL            | 0.285312 | 2.11E-09    | 150465    |
| ZBTB34         | 0.285302 | 2.11E-09    | 403341    |
| PTCD2          | 0.285295 | 2.11E-09    | 79810     |
| NCOA2          | 0.285193 | 2.14E-09    | 10499     |
| ACOT9          | 0.285152 | 2.15E-09    | 23597     |
| ITGB1BP1       | 0.285133 | 2.16E-09    | 9270      |
| DBR1           | 0.285115 | 2.16E-09    | 51163     |
| GDF11          | 0.285068 | 2.18E-09    | 10220     |
| ZNF501         | 0.285061 | 2.18E-09    | 115560    |
| PRPF4B         | 0.285051 | 2.18E-09    | 8899      |
| ADO            | 0.284983 | 2.20E-09    | 84890     |
| WBP4           | 0.284956 | 2.21E-09    | 11193     |
| SEMA6C         | 0.284951 | 2.21E-09    | 10500     |
| AGTPBP1        | 0.284928 | 2.22E-09    | 23287     |
| LPL            | 0.284889 | 2.23E-09    | 4023      |
| KLK13          | 0.284818 | 2.25E-09    | 26085     |
| C6orf62        | 0.284788 | 2.26E-09    | 81688     |
| ABRA           | 0.284779 | 2.26E-09    | 137735    |
| TRERF1         | 0.284745 | 2.27E-09    | 55809     |
| TNKS1BP1       | 0.28473  | 2.28E-09    | 85456     |
| OXR1           | 0.284729 | 2.28E-09    | 55074     |
| PLEKHO1        | 0.284701 | 2.29E-09    | 51177     |
| USP51          | 0.284682 | 2.29E-09    | 158880    |
| SBNO1          | 0.284568 | 2.33E-09    | 55206     |
| PSMD5          | 0.2845   | 2.35E-09    | 5711      |
| CHD2           | 0.284436 | 2.37E-09    | 1106      |
| CXCL6          | 0.284421 | 2.37E-09    | 6372      |
| ZNF423         | 0.284407 | 2.38E-09    | 23090     |
| CENPC          | 0.284366 | 2.39E-09    | 1060      |
| C16orf86       | 0.284332 | 2.40E-09    | 388284    |
| TMEM256-PLSCR3 | 0.284268 | 2.42E-09    | 100529211 |
| SMYD3          | 0.28425  | 2.43E-09    | 64754     |
| CMTR1          | 0.28422  | 2.44E-09    | 23070     |
| INTS4          | 0.284216 | 2.44E-09    | 92105     |
| SESN3          | 0.284172 | 2.45E-09    | 143686    |
| EPB42          | 0.284144 | 2.46E-09    | 2038      |

|           |          |             |        |
|-----------|----------|-------------|--------|
| ZMYM6     | 0.284141 | 2.46E-09    | 9204   |
| PMCH      | 0.284139 | 2.46E-09    | 5367   |
| CASC4     | 0.284128 | 2.47E-09 NA |        |
| PARN      | 0.284127 | 2.47E-09    | 5073   |
| PROK1     | 0.284124 | 2.47E-09    | 84432  |
| DDX19A    | 0.284069 | 2.49E-09    | 55308  |
| POU6F1    | 0.284067 | 2.49E-09    | 5463   |
| ZBTB44    | 0.284066 | 2.49E-09    | 29068  |
| KCTD12    | 0.284062 | 2.49E-09    | 115207 |
| PROX1     | 0.28388  | 2.55E-09    | 5629   |
| ZFAT      | 0.283866 | 2.56E-09    | 57623  |
| MPP6      | 0.283859 | 2.56E-09    | 51678  |
| SOAT1     | 0.283849 | 2.56E-09    | 6646   |
| DYM       | 0.283828 | 2.57E-09    | 54808  |
| TRMT13    | 0.283718 | 2.61E-09    | 54482  |
| LZTFL1    | 0.283711 | 2.61E-09    | 54585  |
| CTNNB1    | 0.283668 | 2.63E-09    | 1499   |
| CPT1C     | 0.283604 | 2.65E-09    | 126129 |
| PPP2R5E   | 0.283588 | 2.65E-09    | 5529   |
| TNFSF8    | 0.283499 | 2.69E-09    | 944    |
| ZNF2      | 0.283472 | 2.69E-09    | 7549   |
| ARMCX3    | 0.28347  | 2.70E-09    | 51566  |
| IDE       | 0.283438 | 2.71E-09    | 3416   |
| BLVRA     | 0.283434 | 2.71E-09    | 644    |
| GIGYF2    | 0.283432 | 2.71E-09    | 26058  |
| PHF11     | 0.283405 | 2.72E-09    | 51131  |
| STARD13   | 0.283393 | 2.72E-09    | 90627  |
| CDH23     | 0.283328 | 2.75E-09    | 64072  |
| TMEM184C  | 0.283318 | 2.75E-09    | 55751  |
| IL17RA    | 0.283307 | 2.75E-09    | 23765  |
| CWC22     | 0.283306 | 2.76E-09    | 57703  |
| FUBP1     | 0.283287 | 2.76E-09    | 8880   |
| TMTC1     | 0.283221 | 2.79E-09    | 83857  |
| ALG10     | 0.28321  | 2.79E-09    | 84920  |
| AP3M2     | 0.283156 | 2.81E-09    | 10947  |
| FAM98A    | 0.283147 | 2.81E-09    | 25940  |
| KRIT1     | 0.28312  | 2.82E-09    | 889    |
| EDEM1     | 0.283108 | 2.83E-09    | 9695   |
| UHRF1BP1L | 0.283094 | 2.83E-09    | 23074  |
| ANKRD17   | 0.283093 | 2.83E-09    | 26057  |
| ZNF12     | 0.283044 | 2.85E-09    | 7559   |
| PRPF38B   | 0.283035 | 2.86E-09    | 55119  |
| SMARCA2   | 0.28301  | 2.87E-09    | 6595   |
| FICD      | 0.282997 | 2.87E-09    | 11153  |
| ANXA8L1   | 0.282986 | 2.88E-09    | 728113 |
| KLHDC1    | 0.282927 | 2.90E-09    | 122773 |
| ZNF319    | 0.282908 | 2.91E-09    | 57567  |
| APOBEC3G  | 0.282898 | 2.91E-09    | 60489  |
| TRIM44    | 0.282896 | 2.91E-09    | 54765  |
| MAP9      | 0.282893 | 2.91E-09    | 79884  |
| CLEC12A   | 0.282818 | 2.94E-09    | 160364 |
| HIF1AN    | 0.282785 | 2.95E-09    | 55662  |
| SLC4A11   | 0.282775 | 2.96E-09    | 83959  |
| PZP       | 0.282735 | 2.97E-09    | 5858   |
| SNX3      | 0.282672 | 3.00E-09    | 8724   |
| CTSZ      | 0.282656 | 3.00E-09    | 1522   |
| FBXO42    | 0.282623 | 3.02E-09    | 54455  |
| SPAG9     | 0.282617 | 3.02E-09    | 9043   |
| TMPPE     | 0.282611 | 3.02E-09    | 643853 |
| SARDH     | 0.282526 | 3.06E-09    | 1757   |

|            |          |             |        |
|------------|----------|-------------|--------|
| TMED8      | 0.282492 | 3.07E-09    | 283578 |
| LSP1       | 0.282489 | 3.07E-09    | 4046   |
| ESM1       | 0.282472 | 3.08E-09    | 11082  |
| SPRR2F     | 0.282469 | 3.08E-09    | 6705   |
| SPTB       | 0.282433 | 3.10E-09    | 6710   |
| C11orf73   | 0.282429 | 3.10E-09 NA |        |
| DDI2       | 0.282372 | 3.12E-09    | 84301  |
| HERPUD2    | 0.282352 | 3.13E-09    | 64224  |
| ARAP1      | 0.282348 | 3.13E-09    | 116985 |
| GTF3C4     | 0.282345 | 3.13E-09    | 9329   |
| VCPKMT     | 0.282333 | 3.14E-09    | 79609  |
| ICE2       | 0.282268 | 3.16E-09    | 79664  |
| FAM195B    | 0.282252 | 3.17E-09 NA |        |
| YPEL5      | 0.28217  | 3.21E-09    | 51646  |
| TSC22D2    | 0.282167 | 3.21E-09    | 9819   |
| CNP        | 0.282156 | 3.21E-09    | 1267   |
| IL20RB     | 0.282131 | 3.22E-09    | 53833  |
| WDR35      | 0.282113 | 3.23E-09    | 57539  |
| SAMD9L     | 0.282104 | 3.23E-09    | 219285 |
| GIMAP6     | 0.282061 | 3.25E-09    | 474344 |
| NUDT4      | 0.281968 | 3.29E-09    | 11163  |
| UBR1       | 0.281967 | 3.29E-09    | 197131 |
| NUDCD1     | 0.281736 | 3.40E-09    | 84955  |
| SLC35E1    | 0.281698 | 3.41E-09    | 79939  |
| IPO11      | 0.281675 | 3.42E-09    | 51194  |
| LRCH1      | 0.281635 | 3.44E-09    | 23143  |
| CNTNAP1    | 0.281628 | 3.45E-09    | 8506   |
| PLSCR1     | 0.281536 | 3.49E-09    | 5359   |
| ARNT       | 0.281475 | 3.52E-09    | 405    |
| USP35      | 0.281451 | 3.53E-09    | 57558  |
| FAM78B     | 0.281428 | 3.54E-09    | 149297 |
| RAD1       | 0.28139  | 3.56E-09    | 5810   |
| TCAF1      | 0.281389 | 3.56E-09    | 9747   |
| FBXW8      | 0.281313 | 3.59E-09    | 26259  |
| TOP2B      | 0.281298 | 3.60E-09    | 7155   |
| KLF8       | 0.281298 | 3.60E-09    | 11279  |
| ZBED8      | 0.281285 | 3.61E-09    | 63920  |
| LYL1       | 0.281233 | 3.63E-09    | 4066   |
| CD109      | 0.281179 | 3.66E-09    | 135228 |
| CHURC1     | 0.281166 | 3.66E-09    | 91612  |
| RAB6A      | 0.281064 | 3.71E-09    | 5870   |
| CHST12     | 0.281056 | 3.72E-09    | 55501  |
| PDE4B      | 0.281045 | 3.72E-09    | 5142   |
| PIGK       | 0.281043 | 3.72E-09    | 10026  |
| CHIT1      | 0.281005 | 3.74E-09    | 1118   |
| YPEL2      | 0.280991 | 3.75E-09    | 388403 |
| LOXL4      | 0.280987 | 3.75E-09    | 84171  |
| YWHAZ      | 0.280915 | 3.79E-09    | 7534   |
| C9orf84    | 0.280865 | 3.81E-09 NA |        |
| AC090154.1 | 0.280838 | 3.83E-09 NA |        |
| C17orf51   | 0.280833 | 3.83E-09 NA |        |
| FAM172A    | 0.280821 | 3.83E-09    | 83989  |
| OR1L8      | 0.280775 | 3.86E-09    | 138881 |
| DNAJC10    | 0.280677 | 3.91E-09    | 54431  |
| RAB3GAP2   | 0.280669 | 3.91E-09    | 25782  |
| CDKL3      | 0.280666 | 3.91E-09    | 51265  |
| EID2B      | 0.280666 | 3.91E-09    | 126272 |
| RAB18      | 0.280656 | 3.92E-09    | 22931  |
| HNRNPLL    | 0.28064  | 3.93E-09    | 92906  |
| GPATCH11   | 0.280637 | 3.93E-09    | 253635 |

|           |          |             |           |
|-----------|----------|-------------|-----------|
| TMTC2     | 0.280629 | 3.93E-09    | 160335    |
| ARRDC5    | 0.280609 | 3.94E-09    | 645432    |
| PGBD1     | 0.280595 | 3.95E-09    | 84547     |
| FBXL4     | 0.28059  | 3.95E-09    | 26235     |
| RAB11FIP5 | 0.280494 | 4.00E-09    | 26056     |
| ZBTB43    | 0.280439 | 4.03E-09    | 23099     |
| FAM133B   | 0.28041  | 4.05E-09    | 257415    |
| KLK5      | 0.280403 | 4.05E-09    | 25818     |
| ZBTB20    | 0.280398 | 4.06E-09    | 26137     |
| CSPP1     | 0.28037  | 4.07E-09    | 79848     |
| FCN1      | 0.28034  | 4.09E-09    | 2219      |
| CSTA      | 0.280317 | 4.10E-09    | 1475      |
| CUL2      | 0.280279 | 4.12E-09    | 8453      |
| SPN       | 0.28026  | 4.13E-09    | 6693      |
| ACTR2     | 0.280258 | 4.13E-09    | 10097     |
| SCRN1     | 0.28023  | 4.15E-09    | 9805      |
| RTL1      | 0.280181 | 4.17E-09    | 388015    |
| NUS1      | 0.280114 | 4.21E-09    | 116150    |
| MTRF1L    | 0.280113 | 4.21E-09    | 54516     |
| SEC24A    | 0.280093 | 4.22E-09    | 10802     |
| CBX1      | 0.280001 | 4.27E-09    | 10951     |
| IL1A      | 0.279942 | 4.31E-09    | 3552      |
| ARL6IP5   | 0.279895 | 4.33E-09    | 10550     |
| NGFR      | 0.279775 | 4.40E-09    | 4804      |
| SERAC1    | 0.279764 | 4.41E-09    | 84947     |
| SIKE1     | 0.279757 | 4.41E-09    | 80143     |
| PSME4     | 0.279709 | 4.44E-09    | 23198     |
| SMC6      | 0.279709 | 4.44E-09    | 79677     |
| YTHDC1    | 0.279652 | 4.47E-09    | 91746     |
| FADS2     | 0.279613 | 4.50E-09    | 9415      |
| MYSM1     | 0.279608 | 4.50E-09    | 114803    |
| PBX2      | 0.279564 | 4.53E-09    | 5089      |
| TCAF2     | 0.279412 | 4.62E-09    | 285966    |
| ANKRD10   | 0.279387 | 4.63E-09    | 55608     |
| SLC38A9   | 0.279336 | 4.66E-09    | 153129    |
| CDKN1B    | 0.279335 | 4.67E-09    | 1027      |
| ZNF610    | 0.279315 | 4.68E-09    | 162963    |
| KIAA0226  | 0.279314 | 4.68E-09 NA |           |
| PHF10     | 0.279287 | 4.69E-09    | 55274     |
| CXCL16    | 0.27928  | 4.70E-09    | 58191     |
| CYSLTR2   | 0.279104 | 4.81E-09    | 57105     |
| CTSC      | 0.279031 | 4.86E-09    | 1075      |
| BMS1      | 0.279011 | 4.87E-09    | 9790      |
| ZNF621    | 0.278995 | 4.88E-09    | 285268    |
| NECAP2    | 0.278961 | 4.90E-09    | 55707     |
| PP2D1     | 0.278947 | 4.91E-09    | 151649    |
| USP6      | 0.278936 | 4.92E-09    | 9098      |
| CDH8      | 0.278919 | 4.93E-09    | 1006      |
| LYPD2     | 0.2789   | 4.94E-09    | 137797    |
| PMS2      | 0.278885 | 4.95E-09    | 5395      |
| TTC25     | 0.278847 | 4.97E-09    | 83538     |
| RAD54L2   | 0.278844 | 4.98E-09    | 23132     |
| CAPG      | 0.278823 | 4.99E-09    | 822       |
| TRIM38    | 0.278744 | 5.04E-09    | 10475     |
| PXT1      | 0.278741 | 5.04E-09    | 222659    |
| ZNF8      | 0.278721 | 5.06E-09    | 7554      |
| TIMM23B   | 0.278686 | 5.08E-09    | 100652748 |
| PTMS      | 0.278682 | 5.08E-09    | 5763      |
| SCN1B     | 0.278605 | 5.13E-09    | 6324      |
| CCDC109B  | 0.278601 | 5.14E-09 NA |           |



|               |          |             |           |
|---------------|----------|-------------|-----------|
| PERP          | 0.278599 | 5.14E-09    | 64065     |
| SRFBP1        | 0.278585 | 5.15E-09    | 153443    |
| ZNF639        | 0.278569 | 5.16E-09    | 51193     |
| DNAH100S      | 0.278557 | 5.17E-09    | 642797    |
| CHRNA3        | 0.278534 | 5.18E-09    | 1136      |
| DIEXF         | 0.278528 | 5.19E-09 NA |           |
| DOCK7         | 0.278522 | 5.19E-09    | 85440     |
| CLDND1        | 0.278466 | 5.23E-09    | 56650     |
| IRG1          | 0.278458 | 5.23E-09 NA |           |
| GUCY1A2       | 0.2784   | 5.27E-09    | 2977      |
| SCD           | 0.278377 | 5.29E-09    | 6319      |
| ABLIM3        | 0.278372 | 5.29E-09    | 22885     |
| FAM122A       | 0.278353 | 5.31E-09    | 116224    |
| FGD2          | 0.278343 | 5.31E-09    | 221472    |
| HCAR3         | 0.278342 | 5.31E-09    | 8843      |
| ASB14         | 0.278332 | 5.32E-09    | 142686    |
| TMPRSS11A     | 0.278284 | 5.36E-09    | 339967    |
| PHF2          | 0.27827  | 5.36E-09    | 5253      |
| MSI2          | 0.278168 | 5.44E-09    | 124540    |
| ATP7A         | 0.27813  | 5.46E-09    | 538       |
| DHX29         | 0.278094 | 5.49E-09    | 54505     |
| C15orf41      | 0.278078 | 5.50E-09 NA |           |
| MYL4          | 0.278072 | 5.51E-09    | 4635      |
| NBAS          | 0.277995 | 5.56E-09    | 51594     |
| CCDC116       | 0.277974 | 5.58E-09    | 164592    |
| SIRT1         | 0.277918 | 5.62E-09    | 23411     |
| SLC9A6        | 0.277881 | 5.65E-09    | 10479     |
| ZHX1          | 0.27787  | 5.65E-09    | 11244     |
| PPP2R2B       | 0.277862 | 5.66E-09    | 5521      |
| NDE1          | 0.277861 | 5.66E-09    | 54820     |
| RTKN2         | 0.277855 | 5.66E-09    | 219790    |
| DNAJB9        | 0.277839 | 5.68E-09    | 4189      |
| C2orf69       | 0.277837 | 5.68E-09    | 205327    |
| GPR107        | 0.277835 | 5.68E-09    | 57720     |
| RP11-302B13.5 | 0.277831 | 5.68E-09 NA |           |
| GNGT2         | 0.27783  | 5.68E-09    | 2793      |
| SUGT1         | 0.277806 | 5.70E-09    | 10910     |
| EFHD1         | 0.277764 | 5.73E-09    | 80303     |
| ABCE1         | 0.277756 | 5.74E-09    | 6059      |
| EYS           | 0.277753 | 5.74E-09    | 346007    |
| CLCN6         | 0.277728 | 5.76E-09    | 1185      |
| BBS4          | 0.277725 | 5.76E-09    | 585       |
| CLK1          | 0.277702 | 5.78E-09    | 1195      |
| DHX40         | 0.277691 | 5.79E-09    | 79665     |
| ZFP14         | 0.277669 | 5.80E-09    | 57677     |
| CHPF2         | 0.277641 | 5.82E-09    | 54480     |
| TMEM185A      | 0.277621 | 5.84E-09    | 84548     |
| UBTD2         | 0.277616 | 5.84E-09    | 92181     |
| SLC24A4       | 0.277568 | 5.88E-09    | 123041    |
| PFKFB1        | 0.277566 | 5.88E-09    | 5207      |
| MRE11A        | 0.277548 | 5.90E-09 NA |           |
| PIAS1         | 0.277497 | 5.94E-09    | 8554      |
| PKD2L1        | 0.277394 | 6.02E-09    | 9033      |
| FAM53C        | 0.277392 | 6.02E-09    | 51307     |
| TJP1          | 0.27738  | 6.03E-09    | 7082      |
| DDX18         | 0.277362 | 6.04E-09    | 8886      |
| ZBED6         | 0.277346 | 6.05E-09    | 100381270 |
| SSR3          | 0.277309 | 6.08E-09    | 6747      |
| AOX1          | 0.277285 | 6.10E-09    | 316       |
| NBPF14        | 0.277262 | 6.12E-09    | 25832     |

|                |          |             |        |
|----------------|----------|-------------|--------|
| PLA2G4C        | 0.277258 | 6.12E-09    | 8605   |
| ATP13A3        | 0.277207 | 6.16E-09    | 79572  |
| SNX27          | 0.277132 | 6.23E-09    | 81609  |
| DYNC1H1        | 0.277118 | 6.24E-09    | 1778   |
| HAUS6          | 0.277103 | 6.25E-09    | 54801  |
| PARD3B         | 0.277073 | 6.27E-09    | 117583 |
| CRYBG3         | 0.277044 | 6.30E-09    | 131544 |
| ZSCAN32        | 0.276998 | 6.33E-09    | 54925  |
| ST7            | 0.276985 | 6.35E-09    | 7982   |
| ZNF221         | 0.276895 | 6.42E-09    | 7638   |
| PLBD2          | 0.276885 | 6.43E-09    | 196463 |
| TRIM39         | 0.276881 | 6.43E-09    | 56658  |
| ZNF260         | 0.276851 | 6.46E-09    | 339324 |
| ZNF92          | 0.276782 | 6.52E-09    | 168374 |
| SETD5          | 0.276674 | 6.61E-09    | 55209  |
| GALNS          | 0.276663 | 6.62E-09    | 2588   |
| ZNF160         | 0.276629 | 6.65E-09    | 90338  |
| GNG10          | 0.276615 | 6.66E-09    | 2790   |
| ATMIN          | 0.276592 | 6.68E-09    | 23300  |
| RNF165         | 0.276592 | 6.68E-09    | 494470 |
| ZBTB24         | 0.276586 | 6.68E-09    | 9841   |
| SMEK2          | 0.276546 | 6.72E-09 NA |        |
| THUMPD1        | 0.276509 | 6.75E-09    | 55623  |
| TBL1XR1        | 0.276504 | 6.76E-09    | 79718  |
| FBXO28         | 0.276503 | 6.76E-09    | 23219  |
| TVP23C         | 0.276498 | 6.76E-09    | 201158 |
| TRIM32         | 0.276459 | 6.80E-09    | 22954  |
| HDX            | 0.2764   | 6.85E-09    | 139324 |
| PRKCI          | 0.276375 | 6.87E-09    | 5584   |
| TRABD2B        | 0.276286 | 6.95E-09    | 388630 |
| HP             | 0.276263 | 6.97E-09    | 3240   |
| LRCH2          | 0.276252 | 6.98E-09    | 57631  |
| ID4            | 0.27624  | 6.99E-09    | 3400   |
| HAS2           | 0.276212 | 7.02E-09    | 3037   |
| MED23          | 0.276209 | 7.02E-09    | 9439   |
| PDE7A          | 0.276201 | 7.03E-09    | 5150   |
| PWP1           | 0.276199 | 7.03E-09    | 11137  |
| SPATA5         | 0.276123 | 7.10E-09    | 166378 |
| EFCAB6         | 0.276038 | 7.18E-09    | 64800  |
| RP5-1042K10.14 | 0.276007 | 7.21E-09 NA |        |
| PLEKHH2        | 0.275973 | 7.24E-09    | 130271 |
| PHF3           | 0.275965 | 7.25E-09    | 23469  |
| DNAJA1         | 0.275951 | 7.26E-09    | 3301   |
| SMC3           | 0.275939 | 7.27E-09    | 9126   |
| FAM109B        | 0.275928 | 7.28E-09 NA |        |
| RBM34          | 0.275887 | 7.32E-09    | 23029  |
| SMG8           | 0.275874 | 7.33E-09    | 55181  |
| NSUN4          | 0.275866 | 7.34E-09    | 387338 |
| DMTF1          | 0.275852 | 7.35E-09    | 9988   |
| SHOC2          | 0.275839 | 7.37E-09    | 8036   |
| GGA2           | 0.27577  | 7.43E-09    | 23062  |
| SUPT6H         | 0.275766 | 7.44E-09    | 6830   |
| RBM27          | 0.275764 | 7.44E-09    | 54439  |
| ZCRB1          | 0.275759 | 7.44E-09    | 85437  |
| RBBP5          | 0.275745 | 7.46E-09    | 5929   |
| ZNF136         | 0.275682 | 7.52E-09    | 7695   |
| EFHC1          | 0.27566  | 7.54E-09    | 114327 |
| ARL3           | 0.275629 | 7.57E-09    | 403    |
| RNMT           | 0.275624 | 7.57E-09    | 8731   |
| INTS2          | 0.275608 | 7.59E-09    | 57508  |

|               |          |          |        |
|---------------|----------|----------|--------|
| ERO1LB        | 0.275558 | 7.64E-09 | NA     |
| FAM204A       | 0.27552  | 7.68E-09 | 63877  |
| SMO           | 0.275512 | 7.68E-09 | 6608   |
| TMEM154       | 0.275504 | 7.69E-09 | 201799 |
| SV2A          | 0.275485 | 7.71E-09 | 9900   |
| ULK4          | 0.27544  | 7.76E-09 | 54986  |
| MIS18BP1      | 0.275423 | 7.77E-09 | 55320  |
| ZNF529        | 0.27541  | 7.79E-09 | 57711  |
| MAPK8         | 0.275403 | 7.79E-09 | 5599   |
| PDLIM7        | 0.275401 | 7.80E-09 | 9260   |
| UBE2V1        | 0.275344 | 7.85E-09 | 7335   |
| FMR1          | 0.275302 | 7.90E-09 | 2332   |
| SCAI          | 0.27528  | 7.92E-09 | 286205 |
| ZNF280C       | 0.275253 | 7.95E-09 | 55609  |
| LSM14A        | 0.275244 | 7.96E-09 | 26065  |
| GPR137C       | 0.27517  | 8.03E-09 | 283554 |
| LACTB         | 0.275146 | 8.06E-09 | 114294 |
| TRAM1L1       | 0.275101 | 8.10E-09 | 133022 |
| MARK3         | 0.27509  | 8.12E-09 | 4140   |
| SLC8A1        | 0.275036 | 8.17E-09 | 6546   |
| EMC2          | 0.27497  | 8.24E-09 | 9694   |
| UBQLN1        | 0.27496  | 8.25E-09 | 29979  |
| RHBDD1        | 0.274951 | 8.26E-09 | 84236  |
| COG5          | 0.274939 | 8.28E-09 | 10466  |
| DUSP19        | 0.274934 | 8.28E-09 | 142679 |
| TENM2         | 0.274904 | 8.31E-09 | 57451  |
| CHD4          | 0.274829 | 8.39E-09 | 1108   |
| MPV17         | 0.274818 | 8.41E-09 | 4358   |
| DUSP11        | 0.274811 | 8.41E-09 | 8446   |
| GDAP2         | 0.274783 | 8.44E-09 | 54834  |
| TTC5          | 0.274775 | 8.45E-09 | 91875  |
| USP48         | 0.274771 | 8.46E-09 | 84196  |
| ZNF506        | 0.274739 | 8.49E-09 | 440515 |
| UFL1          | 0.274616 | 8.63E-09 | 23376  |
| SLC25A36      | 0.274559 | 8.69E-09 | 55186  |
| pk            | 0.274522 | 8.73E-09 | NA     |
| PRRT3         | 0.274455 | 8.81E-09 | 285368 |
| LMBR1         | 0.274442 | 8.82E-09 | 64327  |
| HVCN1         | 0.274441 | 8.83E-09 | 84329  |
| STARD9        | 0.274274 | 9.02E-09 | 57519  |
| SPINK13       | 0.274239 | 9.06E-09 | 153218 |
| GOPC          | 0.274204 | 9.10E-09 | 57120  |
| UBE2Z         | 0.27418  | 9.13E-09 | 65264  |
| RP11-248J23.6 | 0.274154 | 9.16E-09 | NA     |
| SLC24A2       | 0.274143 | 9.17E-09 | 25769  |
| HLA-DQB1      | 0.274128 | 9.19E-09 | 3119   |
| HOXC4         | 0.274111 | 9.21E-09 | 3221   |
| POGK          | 0.274086 | 9.24E-09 | 57645  |
| ATG2B         | 0.274068 | 9.26E-09 | 55102  |
| FNDC3A        | 0.274037 | 9.30E-09 | 22862  |
| PLA2G16       | 0.274029 | 9.31E-09 | NA     |
| RAPGEF3       | 0.273999 | 9.34E-09 | 10411  |
| TAF1A         | 0.273953 | 9.40E-09 | 9015   |
| PCGF6         | 0.273945 | 9.41E-09 | 84108  |
| CREG1         | 0.27394  | 9.41E-09 | 8804   |
| PEX12         | 0.273909 | 9.45E-09 | 5193   |
| PLEKHA5       | 0.273885 | 9.48E-09 | 54477  |
| PANK2         | 0.273805 | 9.58E-09 | 80025  |
| RHD           | 0.273792 | 9.59E-09 | 6007   |
| TMEM206       | 0.273725 | 9.68E-09 | NA     |

|            |          |             |           |
|------------|----------|-------------|-----------|
| USP25      | 0.27369  | 9.72E-09    | 29761     |
| ZNF235     | 0.273689 | 9.72E-09    | 9310      |
| SDC3       | 0.273679 | 9.74E-09    | 9672      |
| XPC        | 0.273674 | 9.74E-09    | 7508      |
| GIMAP5     | 0.273658 | 9.76E-09    | 55340     |
| CEP44      | 0.273621 | 9.81E-09    | 80817     |
| RBM14-RBM4 | 0.273581 | 9.86E-09    | 100526737 |
| 10-9月      | 0.273573 | 9.87E-09 NA |           |
| TCTN2      | 0.273472 | 1.00E-08    | 79867     |
| FBXO10     | 0.273439 | 1.00E-08    | 26267     |
| SLC25A32   | 0.27342  | 1.01E-08    | 81034     |
| XRRA1      | 0.273381 | 1.01E-08    | 143570    |
| DPP8       | 0.273319 | 1.02E-08    | 54878     |
| NFIL3      | 0.273316 | 1.02E-08    | 4783      |
| PRMT9      | 0.273289 | 1.02E-08    | 90826     |
| CMTM7      | 0.273259 | 1.03E-08    | 112616    |
| BDNF       | 0.273245 | 1.03E-08    | 627       |
| TAX1BP1    | 0.273242 | 1.03E-08    | 8887      |
| FHAD1      | 0.273145 | 1.04E-08    | 114827    |
| C4orf50    | 0.273128 | 1.04E-08    | 389197    |
| BAG3       | 0.273118 | 1.05E-08    | 9531      |
| SUPT3H     | 0.273089 | 1.05E-08    | 8464      |
| TOPORS     | 0.273037 | 1.06E-08    | 10210     |
| TTC33      | 0.273032 | 1.06E-08    | 23548     |
| GPR34      | 0.273009 | 1.06E-08    | 2857      |
| SPICE1     | 0.273004 | 1.06E-08    | 152185    |
| RSRC1      | 0.272998 | 1.06E-08    | 51319     |
| ZDHHC20    | 0.272994 | 1.06E-08    | 253832    |
| AGGF1      | 0.272903 | 1.08E-08    | 55109     |
| PHF13      | 0.272873 | 1.08E-08    | 148479    |
| ACTR8      | 0.272856 | 1.08E-08    | 93973     |
| VPS35      | 0.272854 | 1.08E-08    | 55737     |
| UBXN2A     | 0.272851 | 1.08E-08    | 165324    |
| F2RL2      | 0.272848 | 1.08E-08    | 2151      |
| ZXDB       | 0.272819 | 1.09E-08    | 158586    |
| GOLGA2     | 0.272733 | 1.10E-08    | 2801      |
| VCL        | 0.272723 | 1.10E-08    | 7414      |
| ABI1       | 0.272685 | 1.11E-08    | 10006     |
| SPINK9     | 0.272671 | 1.11E-08    | 643394    |
| POU5F2     | 0.27267  | 1.11E-08    | 134187    |
| UBXN4      | 0.272619 | 1.12E-08    | 23190     |
| XKR5       | 0.272597 | 1.12E-08    | 389610    |
| RAPGEF2    | 0.272587 | 1.12E-08    | 9693      |
| CDC26      | 0.272582 | 1.12E-08    | 246184    |
| ACSM6      | 0.272578 | 1.12E-08    | 142827    |
| PRKCQ      | 0.272559 | 1.12E-08    | 5588      |
| SP1        | 0.272512 | 1.13E-08    | 6667      |
| TMEM184B   | 0.272489 | 1.13E-08    | 25829     |
| SYNJ1      | 0.272484 | 1.13E-08    | 8867      |
| C19orf66   | 0.272422 | 1.14E-08 NA |           |
| DCAF4L1    | 0.272381 | 1.15E-08    | 285429    |
| PLEKHA2    | 0.272299 | 1.16E-08    | 59339     |
| DUSP3      | 0.272258 | 1.17E-08    | 1845      |
| MED1       | 0.272256 | 1.17E-08    | 5469      |
| LLGL1      | 0.272208 | 1.18E-08    | 3996      |
| RASGRP4    | 0.272085 | 1.19E-08    | 115727    |
| ZNF250     | 0.272081 | 1.19E-08    | 58500     |
| RNF214     | 0.272063 | 1.20E-08    | 257160    |
| HECA       | 0.272012 | 1.21E-08    | 51696     |
| KCNIP2     | 0.271993 | 1.21E-08    | 30819     |

|            |          |             |           |
|------------|----------|-------------|-----------|
| KLK7       | 0.271964 | 1.21E-08    | 5650      |
| ZNF543     | 0.271953 | 1.21E-08    | 125919    |
| RSBN1L     | 0.271946 | 1.22E-08    | 222194    |
| LRP6       | 0.271917 | 1.22E-08    | 4040      |
| LPGAT1     | 0.271908 | 1.22E-08    | 9926      |
| SH2D1A     | 0.271876 | 1.23E-08    | 4068      |
| NUCKS1     | 0.271691 | 1.26E-08    | 64710     |
| ELF1       | 0.271637 | 1.26E-08    | 1997      |
| TASP1      | 0.271627 | 1.27E-08    | 55617     |
| C2         | 0.271626 | 1.27E-08    | 717       |
| ARL5B      | 0.271626 | 1.27E-08    | 221079    |
| TUBB3      | 0.271607 | 1.27E-08    | 10381     |
| CAND1      | 0.271582 | 1.27E-08    | 55832     |
| CCSAP      | 0.271572 | 1.27E-08    | 126731    |
| TRIB2      | 0.271565 | 1.28E-08    | 28951     |
| MTMR1      | 0.271553 | 1.28E-08    | 8776      |
| KMT2C      | 0.271553 | 1.28E-08    | 58508     |
| FAM110D    | 0.271533 | 1.28E-08    | 79927     |
| ALPK1      | 0.271522 | 1.28E-08    | 80216     |
| SNX25      | 0.271512 | 1.28E-08    | 83891     |
| AC016549.1 | 0.271481 | 1.29E-08 NA |           |
| C18orf25   | 0.271438 | 1.30E-08    | 147339    |
| CPD        | 0.271375 | 1.31E-08    | 1362      |
| CIC        | 0.271268 | 1.33E-08    | 23152     |
| CCDC53     | 0.271262 | 1.33E-08 NA |           |
| HEATR9     | 0.271247 | 1.33E-08    | 256957    |
| ATF1       | 0.271232 | 1.33E-08    | 466       |
| C10orf12   | 0.271193 | 1.34E-08 NA |           |
| STRN       | 0.271166 | 1.34E-08    | 6801      |
| CHST7      | 0.27116  | 1.34E-08    | 56548     |
| SREK1IP1   | 0.271133 | 1.35E-08    | 285672    |
| IRF2BPL    | 0.271102 | 1.35E-08    | 64207     |
| SEC22A     | 0.271091 | 1.36E-08    | 26984     |
| PTPRK      | 0.271079 | 1.36E-08    | 5796      |
| CDC40      | 0.271071 | 1.36E-08    | 51362     |
| ASPH       | 0.270995 | 1.37E-08    | 444       |
| TCTN3      | 0.270984 | 1.37E-08    | 26123     |
| ZNF746     | 0.270955 | 1.38E-08    | 155061    |
| VMP1       | 0.270955 | 1.38E-08    | 81671     |
| UTP23      | 0.270928 | 1.38E-08    | 84294     |
| ICA1L      | 0.270892 | 1.39E-08    | 130026    |
| CDC42BPA   | 0.270844 | 1.40E-08    | 8476      |
| LPCAT2     | 0.270825 | 1.40E-08    | 54947     |
| DCAF5      | 0.270819 | 1.40E-08    | 8816      |
| PPP1R21    | 0.270805 | 1.41E-08    | 129285    |
| CBWD2      | 0.270791 | 1.41E-08    | 150472    |
| PARG       | 0.270758 | 1.41E-08    | 8505      |
| CXCL11     | 0.270747 | 1.42E-08    | 6373      |
| RHOT1      | 0.270743 | 1.42E-08    | 55288     |
| LRP11      | 0.270739 | 1.42E-08    | 84918     |
| SMOX       | 0.270724 | 1.42E-08    | 54498     |
| IL3RA      | 0.270713 | 1.42E-08    | 3563      |
| ARMCX4     | 0.270687 | 1.43E-08    | 100131755 |
| KIAA0040   | 0.270653 | 1.43E-08    | 9674      |
| CTSD       | 0.270598 | 1.44E-08    | 1509      |
| SGPL1      | 0.270593 | 1.44E-08    | 8879      |
| RAPGEF4    | 0.27058  | 1.45E-08    | 11069     |
| TPBGL      | 0.270561 | 1.45E-08    | 100507050 |
| NFXL1      | 0.270524 | 1.46E-08    | 152518    |
| C11orf65   | 0.270475 | 1.47E-08    | 160140    |

|           |          |             |        |
|-----------|----------|-------------|--------|
| TDRKH     | 0.270448 | 1.47E-08    | 11022  |
| MON2      | 0.270443 | 1.47E-08    | 23041  |
| USP24     | 0.27042  | 1.48E-08    | 23358  |
| ATF5      | 0.270382 | 1.48E-08    | 22809  |
| WDR33     | 0.270353 | 1.49E-08    | 55339  |
| ANKRD36   | 0.270274 | 1.50E-08    | 375248 |
| PGM2      | 0.270266 | 1.51E-08    | 55276  |
| PPIG      | 0.270201 | 1.52E-08    | 9360   |
| TGIF2     | 0.270194 | 1.52E-08    | 60436  |
| ADAM10    | 0.270188 | 1.52E-08    | 102    |
| RFC1      | 0.270129 | 1.53E-08    | 5981   |
| APOD      | 0.270116 | 1.53E-08    | 347    |
| C11orf57  | 0.270065 | 1.54E-08 NA |        |
| PIP5K1A   | 0.270064 | 1.54E-08    | 8394   |
| RBSN      | 0.270063 | 1.54E-08    | 64145  |
| MYO18B    | 0.270045 | 1.55E-08    | 84700  |
| TSHR      | 0.270026 | 1.55E-08    | 7253   |
| FAM13C    | 0.269991 | 1.56E-08    | 220965 |
| CTDSPL2   | 0.269868 | 1.58E-08    | 51496  |
| C9orf131  | 0.269854 | 1.59E-08    | 138724 |
| TNFRSF12A | 0.269818 | 1.59E-08    | 51330  |
| SS18      | 0.269784 | 1.60E-08    | 6760   |
| RBM26     | 0.269767 | 1.60E-08    | 64062  |
| EYA4      | 0.26975  | 1.61E-08    | 2070   |
| KLHDC7B   | 0.269695 | 1.62E-08    | 113730 |
| MCMBP     | 0.269687 | 1.62E-08    | 79892  |
| DICER1    | 0.26959  | 1.64E-08    | 23405  |
| NAB2      | 0.26957  | 1.64E-08    | 4665   |
| TAF1B     | 0.269554 | 1.65E-08    | 9014   |
| CSTF2T    | 0.269548 | 1.65E-08    | 23283  |
| ACAP2     | 0.269536 | 1.65E-08    | 23527  |
| CDK13     | 0.269486 | 1.66E-08    | 8621   |
| SMARCAD1  | 0.26946  | 1.67E-08    | 56916  |
| CAPRIN1   | 0.269422 | 1.68E-08    | 4076   |
| MTHFD1L   | 0.269391 | 1.68E-08    | 25902  |
| NPHP3     | 0.26939  | 1.68E-08    | 27031  |
| SERINC3   | 0.269373 | 1.69E-08    | 10955  |
| GZMK      | 0.26936  | 1.69E-08    | 3003   |
| GYPC      | 0.269288 | 1.70E-08    | 2995   |
| BATF      | 0.269287 | 1.70E-08    | 10538  |
| HOMER1    | 0.269282 | 1.71E-08    | 9456   |
| ATG14     | 0.269265 | 1.71E-08    | 22863  |
| KIAA1279  | 0.269237 | 1.71E-08 NA |        |
| TRAPPC11  | 0.269222 | 1.72E-08    | 60684  |
| IL15RA    | 0.269184 | 1.73E-08    | 3601   |
| CHRM5     | 0.269168 | 1.73E-08    | 1133   |
| N4BP1     | 0.269157 | 1.73E-08    | 9683   |
| SYNE3     | 0.269151 | 1.73E-08    | 161176 |
| C5orf15   | 0.269141 | 1.74E-08    | 56951  |
| TMEM165   | 0.269134 | 1.74E-08    | 55858  |
| KCNAB1    | 0.269085 | 1.75E-08    | 7881   |
| EXO3      | 0.269036 | 1.76E-08    | 9941   |
| FBXO3     | 0.268985 | 1.77E-08    | 26273  |
| ZBTB37    | 0.268984 | 1.77E-08    | 84614  |
| ZNF518B   | 0.268897 | 1.79E-08    | 85460  |
| KCTD21    | 0.268888 | 1.79E-08    | 283219 |
| LRRTM3    | 0.268885 | 1.79E-08    | 347731 |
| MAP1LC3B  | 0.268853 | 1.80E-08    | 81631  |
| ANP32E    | 0.268831 | 1.80E-08    | 81611  |
| NAA30     | 0.268812 | 1.81E-08    | 122830 |

|          |          |             |        |
|----------|----------|-------------|--------|
| SERPINB4 | 0.268802 | 1.81E-08    | 6318   |
| RIC8B    | 0.26877  | 1.82E-08    | 55188  |
| DARS     | 0.268744 | 1.82E-08 NA |        |
| GATS     | 0.268731 | 1.83E-08 NA |        |
| LYSMD3   | 0.268692 | 1.84E-08    | 116068 |
| POMK     | 0.268685 | 1.84E-08    | 84197  |
| METTL16  | 0.268633 | 1.85E-08    | 79066  |
| LIPJ     | 0.268631 | 1.85E-08    | 142910 |
| IRAK4    | 0.268529 | 1.87E-08    | 51135  |
| CGNL1    | 0.268459 | 1.89E-08    | 84952  |
| ARAP2    | 0.268455 | 1.89E-08    | 116984 |
| TEX10    | 0.268433 | 1.90E-08    | 54881  |
| APH1B    | 0.268414 | 1.90E-08    | 83464  |
| BTBD10   | 0.268337 | 1.92E-08    | 84280  |
| RGPD8    | 0.268297 | 1.93E-08    | 727851 |
| AKTIP    | 0.268296 | 1.93E-08    | 64400  |
| CRYBA1   | 0.268284 | 1.93E-08    | 1411   |
| SMG6     | 0.268271 | 1.94E-08    | 23293  |
| ZNF71    | 0.268207 | 1.95E-08    | 58491  |
| CPPED1   | 0.268205 | 1.95E-08    | 55313  |
| NUPL1    | 0.268202 | 1.95E-08 NA |        |
| ANKUB1   | 0.2682   | 1.95E-08    | 389161 |
| HEATR1   | 0.26818  | 1.96E-08    | 55127  |
| INTS8    | 0.268105 | 1.98E-08    | 55656  |
| FADS3    | 0.268016 | 2.00E-08    | 3995   |
| CXCL8    | 0.268012 | 2.00E-08    | 3576   |
| RRAGB    | 0.268011 | 2.00E-08    | 10325  |
| MSL3     | 0.267976 | 2.01E-08    | 10943  |
| PCF11    | 0.267976 | 2.01E-08    | 51585  |
| SMAD1    | 0.267973 | 2.01E-08    | 4086   |
| LSM11    | 0.267937 | 2.02E-08    | 134353 |
| AP1S3    | 0.267916 | 2.03E-08    | 130340 |
| MICAL2   | 0.267915 | 2.03E-08    | 9645   |
| ZNF597   | 0.267903 | 2.03E-08    | 146434 |
| SNRNP27  | 0.267887 | 2.03E-08    | 11017  |
| BAZ1B    | 0.267823 | 2.05E-08    | 9031   |
| FOXN3    | 0.267823 | 2.05E-08    | 1112   |
| SPRR3    | 0.267784 | 2.06E-08    | 6707   |
| ZNF480   | 0.267779 | 2.06E-08    | 147657 |
| APPL1    | 0.26776  | 2.07E-08    | 26060  |
| GIMAP8   | 0.267752 | 2.07E-08    | 155038 |
| RAP1B    | 0.267746 | 2.07E-08    | 5908   |
| PAPOLA   | 0.267744 | 2.07E-08    | 10914  |
| LCA5L    | 0.267701 | 2.08E-08    | 150082 |
| HSP90B1  | 0.26767  | 2.09E-08    | 7184   |
| EIF1AD   | 0.267665 | 2.09E-08    | 84285  |
| EP400NL  | 0.267635 | 2.10E-08 NA |        |
| VAV1     | 0.267634 | 2.10E-08    | 7409   |
| CEP57    | 0.267613 | 2.10E-08    | 9702   |
| TBC1D15  | 0.26752  | 2.13E-08    | 64786  |
| OTUD6B   | 0.267512 | 2.13E-08    | 51633  |
| FXYD5    | 0.26751  | 2.13E-08    | 53827  |
| GPRASP1  | 0.267476 | 2.14E-08    | 9737   |
| CRTAM    | 0.267458 | 2.14E-08    | 56253  |
| TAF12    | 0.267406 | 2.16E-08    | 6883   |
| ASAH1    | 0.267322 | 2.18E-08    | 427    |
| CYTIP    | 0.26728  | 2.19E-08    | 9595   |
| A1BG     | 0.267276 | 2.19E-08    | 1      |
| NDST1    | 0.267267 | 2.20E-08    | 3340   |
| SETDB2   | 0.267256 | 2.20E-08    | 83852  |

|            |          |             |           |
|------------|----------|-------------|-----------|
| RTN2       | 0.267203 | 2.21E-08    | 6253      |
| SLCO2B1    | 0.267122 | 2.24E-08    | 11309     |
| AGBL3      | 0.267111 | 2.24E-08    | 340351    |
| TBCCD1     | 0.267082 | 2.25E-08    | 55171     |
| CRLF3      | 0.26698  | 2.28E-08    | 51379     |
| REV1       | 0.266959 | 2.28E-08    | 51455     |
| COL4A3BP   | 0.266949 | 2.29E-08 NA |           |
| CAPN14     | 0.266943 | 2.29E-08    | 440854    |
| RBM18      | 0.26694  | 2.29E-08    | 92400     |
| AC242988.1 | 0.266923 | 2.29E-08 NA |           |
| MMP7       | 0.266853 | 2.31E-08    | 4316      |
| SLC39A1    | 0.266839 | 2.32E-08    | 27173     |
| C1QA       | 0.266802 | 2.33E-08    | 712       |
| LOH12CR1   | 0.266797 | 2.33E-08 NA |           |
| ARR3       | 0.266756 | 2.34E-08    | 407       |
| UBAP1      | 0.26671  | 2.36E-08    | 51271     |
| WDR75      | 0.266687 | 2.36E-08    | 84128     |
| GOLGA8N    | 0.266669 | 2.37E-08    | 643699    |
| RAPGEF6    | 0.266666 | 2.37E-08    | 51735     |
| PPP5D1     | 0.266648 | 2.37E-08    | 100506012 |
| GHRL       | 0.266628 | 2.38E-08    | 51738     |
| MLKL       | 0.266627 | 2.38E-08    | 197259    |
| HEATR6     | 0.26662  | 2.38E-08    | 63897     |
| SLC24A1    | 0.266614 | 2.38E-08    | 9187      |
| KNOP1      | 0.26661  | 2.39E-08    | 400506    |
| HHEX       | 0.266595 | 2.39E-08    | 3087      |
| FAM188B    | 0.266591 | 2.39E-08 NA |           |
| ANAPC10    | 0.26655  | 2.40E-08    | 10393     |
| C11orf74   | 0.266549 | 2.40E-08 NA |           |
| NXF1       | 0.266522 | 2.41E-08    | 10482     |
| BRAP       | 0.266487 | 2.42E-08    | 8315      |
| CNFN       | 0.266446 | 2.43E-08    | 84518     |
| MPHOSPH10  | 0.266444 | 2.44E-08    | 10199     |
| DPY19L2    | 0.266444 | 2.44E-08    | 283417    |
| TCF15      | 0.266439 | 2.44E-08    | 6939      |
| CEP63      | 0.266393 | 2.45E-08    | 80254     |
| MFSD12     | 0.266388 | 2.45E-08    | 126321    |
| PCDHA6     | 0.266318 | 2.47E-08    | 56142     |
| BIRC6      | 0.266266 | 2.49E-08    | 57448     |
| LDLRAD3    | 0.266245 | 2.50E-08    | 143458    |
| HSP90AB1   | 0.266228 | 2.50E-08    | 3326      |
| PLTP       | 0.266226 | 2.50E-08    | 5360      |
| FIP1L1     | 0.266192 | 2.51E-08    | 81608     |
| AC253572.1 | 0.266106 | 2.54E-08 NA |           |
| SP7        | 0.266091 | 2.54E-08    | 121340    |
| RNASE7     | 0.266037 | 2.56E-08    | 84659     |
| TPP2       | 0.266034 | 2.56E-08    | 7174      |
| RB1        | 0.266021 | 2.57E-08    | 5925      |
| PCDHA10    | 0.266013 | 2.57E-08    | 56139     |
| SGMS1      | 0.266011 | 2.57E-08    | 259230    |
| WDR92      | 0.265998 | 2.57E-08    | 116143    |
| SLC9A3R2   | 0.265959 | 2.59E-08    | 9351      |
| EP400      | 0.265945 | 2.59E-08    | 57634     |
| SMIM8      | 0.265908 | 2.60E-08    | 57150     |
| NOLC1      | 0.265896 | 2.61E-08    | 9221      |
| MYLK3      | 0.265865 | 2.62E-08    | 91807     |
| TTLL9      | 0.265779 | 2.65E-08    | 164395    |
| RGCC       | 0.265757 | 2.65E-08    | 28984     |
| ZNF804A    | 0.265713 | 2.67E-08    | 91752     |
| ZNF766     | 0.265678 | 2.68E-08    | 90321     |



|               |          |             |        |
|---------------|----------|-------------|--------|
| LMO2          | 0.265676 | 2.68E-08    | 4005   |
| CCL22         | 0.265604 | 2.70E-08    | 6367   |
| RAB5A         | 0.2656   | 2.71E-08    | 5868   |
| EIF5B         | 0.265555 | 2.72E-08    | 9669   |
| KIAA1143      | 0.26553  | 2.73E-08    | 57456  |
| DERL1         | 0.265412 | 2.77E-08    | 79139  |
| SNAPC3        | 0.265389 | 2.78E-08    | 6619   |
| C9orf72       | 0.265376 | 2.78E-08    | 203228 |
| GPR87         | 0.265368 | 2.78E-08    | 53836  |
| LIMD2         | 0.265355 | 2.79E-08    | 80774  |
| EDRF1         | 0.26533  | 2.80E-08    | 26098  |
| ZBTB40        | 0.265322 | 2.80E-08    | 9923   |
| FAM227A       | 0.265275 | 2.82E-08    | 646851 |
| PSMD12        | 0.265178 | 2.85E-08    | 5718   |
| MYOZ1         | 0.265176 | 2.85E-08    | 58529  |
| TTYH3         | 0.265162 | 2.86E-08    | 80727  |
| YME1L1        | 0.265144 | 2.86E-08    | 10730  |
| TNKS          | 0.265138 | 2.86E-08    | 8658   |
| UIMC1         | 0.265096 | 2.88E-08    | 51720  |
| PPRC1         | 0.265082 | 2.89E-08    | 23082  |
| RP11-766F14.2 | 0.265082 | 2.89E-08 NA |        |
| LRRTM2        | 0.265073 | 2.89E-08    | 26045  |
| FOXI2         | 0.265068 | 2.89E-08    | 399823 |
| ZNF674        | 0.265044 | 2.90E-08    | 641339 |
| PPP4R2        | 0.265027 | 2.90E-08    | 151987 |
| HMGXB4        | 0.265017 | 2.91E-08    | 10042  |
| MAML1         | 0.264989 | 2.92E-08    | 9794   |
| TMEM123       | 0.264975 | 2.92E-08    | 114908 |
| CDKL4         | 0.264965 | 2.93E-08    | 344387 |
| USP42         | 0.264955 | 2.93E-08    | 84132  |
| SPDYE5        | 0.264844 | 2.97E-08    | 442590 |
| RP11-136C24.3 | 0.264837 | 2.97E-08 NA |        |
| BCAS3         | 0.264819 | 2.98E-08    | 54828  |
| DDX3X         | 0.264814 | 2.98E-08    | 1654   |
| RPTN          | 0.264629 | 3.05E-08    | 126638 |
| PPFIA1        | 0.264626 | 3.05E-08    | 8500   |
| ANAPC1        | 0.264618 | 3.06E-08    | 64682  |
| C1QB          | 0.264579 | 3.07E-08    | 713    |
| THAP5         | 0.264537 | 3.09E-08    | 168451 |
| ZFX           | 0.264526 | 3.09E-08    | 7543   |
| CDK12         | 0.264521 | 3.09E-08    | 51755  |
| ZNF852        | 0.264491 | 3.10E-08    | 285346 |
| TTC27         | 0.264447 | 3.12E-08    | 55622  |
| ZNF106        | 0.264439 | 3.12E-08    | 64397  |
| KIF13A        | 0.264434 | 3.13E-08    | 63971  |
| RYR2          | 0.264425 | 3.13E-08    | 6262   |
| TMC1          | 0.264404 | 3.14E-08    | 117531 |
| ELMO1         | 0.264363 | 3.15E-08    | 9844   |
| RBM48         | 0.26436  | 3.16E-08    | 84060  |
| PTPN1         | 0.26434  | 3.16E-08    | 5770   |
| CMTR2         | 0.264282 | 3.19E-08    | 55783  |
| TCEANC2       | 0.264219 | 3.21E-08    | 127428 |
| TAF8          | 0.264111 | 3.25E-08    | 129685 |
| FEZ2          | 0.264067 | 3.27E-08    | 9637   |
| SEC23A        | 0.264058 | 3.28E-08    | 10484  |
| THUMPD2       | 0.264015 | 3.29E-08    | 80745  |
| LRFN5         | 0.264007 | 3.30E-08    | 145581 |
| CDK19         | 0.263996 | 3.30E-08    | 23097  |
| PTPRB         | 0.263896 | 3.34E-08    | 5787   |
| ZNF708        | 0.263888 | 3.34E-08    | 7562   |

|          |          |             |           |
|----------|----------|-------------|-----------|
| MEGF10   | 0.263791 | 3.39E-08    | 84466     |
| MBTPS2   | 0.26379  | 3.39E-08    | 51360     |
| XPO1     | 0.263759 | 3.40E-08    | 7514      |
| WDR43    | 0.263692 | 3.43E-08    | 23160     |
| RNF113B  | 0.263679 | 3.43E-08    | 140432    |
| SLC25A17 | 0.26366  | 3.44E-08    | 10478     |
| PDIA6    | 0.263638 | 3.45E-08    | 10130     |
| BRWD1    | 0.2636   | 3.47E-08    | 54014     |
| MTF2     | 0.263577 | 3.48E-08    | 22823     |
| GJC1     | 0.263539 | 3.49E-08    | 10052     |
| GEMIN5   | 0.263539 | 3.49E-08    | 25929     |
| DIS3     | 0.263476 | 3.52E-08    | 22894     |
| TEX9     | 0.263459 | 3.53E-08    | 374618    |
| CPSF2    | 0.263428 | 3.54E-08    | 53981     |
| SMARCC1  | 0.263412 | 3.55E-08    | 6599      |
| NFIX     | 0.263319 | 3.59E-08    | 4784      |
| METTL9   | 0.2633   | 3.60E-08    | 51108     |
| DRAXIN   | 0.263291 | 3.60E-08    | 374946    |
| HNRNPU   | 0.263262 | 3.61E-08    | 3192      |
| THAP6    | 0.263257 | 3.62E-08    | 152815    |
| UTP11L   | 0.263218 | 3.63E-08 NA |           |
| PYURF    | 0.263209 | 3.64E-08    | 100996939 |
| ZNF197   | 0.263196 | 3.64E-08    | 10168     |
| TUBD1    | 0.263164 | 3.66E-08    | 51174     |
| COPS2    | 0.263058 | 3.71E-08    | 9318      |
| TXLNA    | 0.263046 | 3.71E-08    | 200081    |
| TMX1     | 0.263002 | 3.73E-08    | 81542     |
| PHF12    | 0.262963 | 3.75E-08    | 57649     |
| IFIH1    | 0.262922 | 3.77E-08    | 64135     |
| FAM89B   | 0.262894 | 3.78E-08    | 23625     |
| NEBL     | 0.262881 | 3.79E-08    | 10529     |
| ARMC3    | 0.262867 | 3.79E-08    | 219681    |
| CLEC12B  | 0.262827 | 3.81E-08    | 387837    |
| TLR7     | 0.262821 | 3.82E-08    | 51284     |
| FBXW7    | 0.262795 | 3.83E-08    | 55294     |
| SPRYD3   | 0.262792 | 3.83E-08    | 84926     |
| POLR3GL  | 0.262672 | 3.89E-08    | 84265     |
| DGKH     | 0.262666 | 3.89E-08    | 160851    |
| DYNLT3   | 0.262663 | 3.89E-08    | 6990      |
| TP53BP1  | 0.262658 | 3.89E-08    | 7158      |
| HSPH1    | 0.26264  | 3.90E-08    | 10808     |
| VAMP7    | 0.262597 | 3.92E-08    | 6845      |
| MAN2B1   | 0.262507 | 3.97E-08    | 4125      |
| TP53BP2  | 0.262469 | 3.98E-08    | 7159      |
| IMPG1    | 0.26242  | 4.01E-08    | 3617      |
| HAS1     | 0.262414 | 4.01E-08    | 3036      |
| ARMC8    | 0.262412 | 4.01E-08    | 25852     |
| ARHGAP12 | 0.262393 | 4.02E-08    | 94134     |
| PDCD11   | 0.262392 | 4.02E-08    | 22984     |
| HMBOX1   | 0.262325 | 4.06E-08    | 79618     |
| UFM1     | 0.262313 | 4.06E-08    | 51569     |
| CC2D2B   | 0.262279 | 4.08E-08    | 387707    |
| MORC2    | 0.262273 | 4.08E-08    | 22880     |
| HMGN4    | 0.262236 | 4.10E-08    | 10473     |
| CAPN7    | 0.262194 | 4.12E-08    | 23473     |
| IL20RA   | 0.262179 | 4.13E-08    | 53832     |
| ZNF619   | 0.262127 | 4.15E-08    | 285267    |
| AHCTF1   | 0.262123 | 4.16E-08    | 25909     |
| ETV6     | 0.26211  | 4.16E-08    | 2120      |
| NAP1L5   | 0.262089 | 4.17E-08    | 266812    |

|             |          |          |           |
|-------------|----------|----------|-----------|
| CDV3        | 0.262074 | 4.18E-08 | 55573     |
| PRR3        | 0.262069 | 4.18E-08 | 80742     |
| RAD51D      | 0.262033 | 4.20E-08 | 5892      |
| SH3TC2      | 0.262    | 4.22E-08 | 79628     |
| GPR135      | 0.261922 | 4.26E-08 | 64582     |
| S100A4      | 0.26192  | 4.26E-08 | 6275      |
| ZNF564      | 0.261907 | 4.27E-08 | 163050    |
| RNF166      | 0.261895 | 4.27E-08 | 115992    |
| ENC1        | 0.261867 | 4.29E-08 | 8507      |
| LDLRAD2     | 0.261805 | 4.32E-08 | 401944    |
| CCDC7       | 0.261787 | 4.33E-08 | 79741     |
| HLA-DRB1    | 0.261706 | 4.37E-08 | 3123      |
| KBTBD6      | 0.26155  | 4.46E-08 | 89890     |
| ZNF230      | 0.26155  | 4.46E-08 | 7773      |
| EIF2S1      | 0.261535 | 4.47E-08 | 1965      |
| PDE6C       | 0.261531 | 4.47E-08 | 5146      |
| NAA16       | 0.261515 | 4.48E-08 | 79612     |
| SUMO4       | 0.261441 | 4.52E-08 | 387082    |
| PREPL       | 0.26144  | 4.52E-08 | 9581      |
| ACLY        | 0.261373 | 4.56E-08 | 47        |
| PELI3       | 0.261359 | 4.56E-08 | 246330    |
| ABCA9       | 0.261358 | 4.56E-08 | 10350     |
| DCLK2       | 0.261349 | 4.57E-08 | 166614    |
| PAN3        | 0.261336 | 4.58E-08 | 255967    |
| UBE2E3      | 0.261314 | 4.59E-08 | 10477     |
| KPNA7       | 0.261297 | 4.60E-08 | 402569    |
| PYHIN1      | 0.261277 | 4.61E-08 | 149628    |
| METTL21A    | 0.261248 | 4.63E-08 | 151194    |
| CTTNBP2NL   | 0.261245 | 4.63E-08 | 55917     |
| LDHAL6A     | 0.2612   | 4.65E-08 | 160287    |
| PSMC1       | 0.261196 | 4.66E-08 | 5700      |
| HLA-DRA     | 0.261179 | 4.67E-08 | 3122      |
| MB21D1      | 0.261106 | 4.71E-08 | NA        |
| CHURC1-FNTB | 0.26106  | 4.73E-08 | 100529261 |
| STXBP5      | 0.261054 | 4.74E-08 | 134957    |
| ACSS3       | 0.261033 | 4.75E-08 | 79611     |
| PMS1        | 0.260926 | 4.81E-08 | 5378      |
| DHX8        | 0.260906 | 4.82E-08 | 1659      |
| EAF1        | 0.260873 | 4.84E-08 | 85403     |
| ANO3        | 0.260867 | 4.85E-08 | 63982     |
| TNFAIP8     | 0.260845 | 4.86E-08 | 25816     |
| MAPKAPK2    | 0.260812 | 4.88E-08 | 9261      |
| SLC36A4     | 0.260807 | 4.88E-08 | 120103    |
| RLIM        | 0.260783 | 4.90E-08 | 51132     |
| XPA         | 0.260744 | 4.92E-08 | 7507      |
| TRIM62      | 0.260738 | 4.92E-08 | 55223     |
| SUPT7L      | 0.26068  | 4.96E-08 | 9913      |
| SLC29A1     | 0.260657 | 4.97E-08 | 2030      |
| CD274       | 0.260595 | 5.01E-08 | 29126     |
| IL6         | 0.260583 | 5.02E-08 | 3569      |
| ZNF474      | 0.260581 | 5.02E-08 | 133923    |
| OLFML3      | 0.260578 | 5.02E-08 | 56944     |
| ZNF326      | 0.260571 | 5.02E-08 | 284695    |
| VKORC1L1    | 0.260565 | 5.03E-08 | 154807    |
| ZNF827      | 0.260547 | 5.04E-08 | 152485    |
| NFIB        | 0.260523 | 5.05E-08 | 4781      |
| SMARCAL1    | 0.260481 | 5.08E-08 | 50485     |
| REC114      | 0.260462 | 5.09E-08 | 283677    |
| SLC2A12     | 0.260447 | 5.10E-08 | 154091    |
| CRKL        | 0.260428 | 5.11E-08 | 1399      |

|               |          |             |        |
|---------------|----------|-------------|--------|
| ZXDA          | 0.260427 | 5.11E-08    | 7789   |
| ZNF582        | 0.26042  | 5.12E-08    | 147948 |
| ALMS1         | 0.26042  | 5.12E-08    | 7840   |
| SNRNP48       | 0.260379 | 5.14E-08    | 154007 |
| TTL5          | 0.260365 | 5.15E-08    | 23093  |
| CHST2         | 0.260334 | 5.17E-08    | 9435   |
| DMXL2         | 0.26032  | 5.18E-08    | 23312  |
| KIF20B        | 0.260309 | 5.19E-08    | 9585   |
| TMEM237       | 0.260304 | 5.19E-08    | 65062  |
| RP11-690P14.4 | 0.260299 | 5.19E-08 NA |        |
| JAG1          | 0.260296 | 5.20E-08    | 182    |
| LRRC8E        | 0.260288 | 5.20E-08    | 80131  |
| FANCM         | 0.26027  | 5.21E-08    | 57697  |
| ZNF445        | 0.260248 | 5.23E-08    | 353274 |
| USP11         | 0.260213 | 5.25E-08    | 8237   |
| SYT15         | 0.260168 | 5.28E-08    | 83849  |
| TDRD3         | 0.2601   | 5.32E-08    | 81550  |
| RBPM5         | 0.260082 | 5.33E-08    | 11030  |
| LGALS8        | 0.26008  | 5.33E-08    | 3964   |
| CEPT1         | 0.260028 | 5.37E-08    | 10390  |
| C1GALT1       | 0.26001  | 5.38E-08    | 56913  |
| RP5-966M1.6   | 0.260003 | 5.38E-08 NA |        |
| ZNF184        | 0.259977 | 5.40E-08    | 7738   |
| KSR1          | 0.259972 | 5.41E-08    | 8844   |
| CHD3          | 0.259881 | 5.46E-08    | 1107   |
| CSNK1G1       | 0.259879 | 5.47E-08    | 53944  |
| FUBP3         | 0.25986  | 5.48E-08    | 8939   |
| RGS12         | 0.259842 | 5.49E-08    | 6002   |
| TMEM104       | 0.259838 | 5.49E-08    | 54868  |
| IQCG          | 0.25982  | 5.51E-08    | 84223  |
| TUBB          | 0.259743 | 5.56E-08    | 203068 |
| IRX6          | 0.259705 | 5.58E-08    | 79190  |
| EML3          | 0.259651 | 5.62E-08    | 256364 |
| CELF2         | 0.259642 | 5.63E-08    | 10659  |
| A2ML1         | 0.259594 | 5.66E-08    | 144568 |
| ERCC8         | 0.259585 | 5.67E-08    | 1161   |
| PRIM2         | 0.259584 | 5.67E-08    | 5558   |
| WDR53         | 0.259576 | 5.67E-08    | 348793 |
| PPP1R2        | 0.259561 | 5.68E-08    | 5504   |
| MTURN         | 0.25956  | 5.68E-08    | 222166 |
| SDE2          | 0.25955  | 5.69E-08    | 163859 |
| ASNSD1        | 0.259548 | 5.69E-08    | 54529  |
| SUZ12         | 0.259547 | 5.69E-08    | 23512  |
| ARPC2         | 0.259514 | 5.71E-08    | 10109  |
| RYBP          | 0.259507 | 5.72E-08    | 23429  |
| EIF3A         | 0.259477 | 5.74E-08    | 8661   |
| DNAJC3        | 0.259434 | 5.77E-08    | 5611   |
| C16orf45      | 0.259418 | 5.78E-08 NA |        |
| ENOX2         | 0.259358 | 5.82E-08    | 10495  |
| C3orf38       | 0.259354 | 5.83E-08    | 285237 |
| DTX3          | 0.259312 | 5.86E-08    | 196403 |
| ATRNL1        | 0.259263 | 5.89E-08    | 8455   |
| DDX5          | 0.259212 | 5.93E-08    | 1655   |
| DCLRE1C       | 0.259189 | 5.94E-08    | 64421  |
| GZMH          | 0.259173 | 5.95E-08    | 2999   |
| PKD1          | 0.259124 | 5.99E-08    | 5310   |
| TSPAN2        | 0.259115 | 6.00E-08    | 10100  |
| BMP2K         | 0.259101 | 6.01E-08    | 55589  |
| WRN           | 0.259024 | 6.06E-08    | 7486   |
| CD99          | 0.259023 | 6.06E-08    | 4267   |

|                |          |             |        |
|----------------|----------|-------------|--------|
| PHAX           | 0.259009 | 6.08E-08    | 51808  |
| ZBTB32         | 0.258975 | 6.10E-08    | 27033  |
| PUS3           | 0.258973 | 6.10E-08    | 83480  |
| ABHD4          | 0.258942 | 6.12E-08    | 63874  |
| NAA15          | 0.25894  | 6.13E-08    | 80155  |
| ZNF100         | 0.25894  | 6.13E-08    | 163227 |
| GID4           | 0.258912 | 6.15E-08    | 79018  |
| ZNF573         | 0.258896 | 6.16E-08    | 126231 |
| ULK1           | 0.258853 | 6.19E-08    | 8408   |
| THOC5          | 0.258846 | 6.20E-08    | 8563   |
| TBC1D32        | 0.258796 | 6.23E-08    | 221322 |
| API5           | 0.258795 | 6.23E-08    | 8539   |
| CCNY           | 0.25876  | 6.26E-08    | 219771 |
| ZDBF2          | 0.258741 | 6.27E-08    | 57683  |
| C12orf60       | 0.25874  | 6.28E-08    | 144608 |
| MPHOSPH9       | 0.258708 | 6.30E-08    | 10198  |
| ZNF562         | 0.258689 | 6.31E-08    | 54811  |
| STRN3          | 0.25868  | 6.32E-08    | 29966  |
| GAFA3          | 0.258645 | 6.35E-08 NA |        |
| WWOX           | 0.258643 | 6.35E-08    | 51741  |
| KDM4D          | 0.25863  | 6.36E-08    | 55693  |
| LCOR           | 0.258625 | 6.36E-08    | 84458  |
| ELMOD2         | 0.258618 | 6.37E-08    | 255520 |
| SPARCL1        | 0.258576 | 6.40E-08    | 8404   |
| TTC26          | 0.258527 | 6.44E-08    | 79989  |
| ST13           | 0.258513 | 6.45E-08    | 6767   |
| SYPL1          | 0.258487 | 6.47E-08    | 6856   |
| IFNAR1         | 0.258432 | 6.51E-08    | 3454   |
| DNAJC13        | 0.258404 | 6.54E-08    | 23317  |
| GXYLT1         | 0.258375 | 6.56E-08    | 283464 |
| FAM92A1        | 0.258366 | 6.57E-08 NA |        |
| MTMR7          | 0.258356 | 6.57E-08    | 9108   |
| CUTC           | 0.258329 | 6.59E-08    | 51076  |
| CR1            | 0.25832  | 6.60E-08    | 1378   |
| SH3GL1         | 0.258308 | 6.61E-08    | 6455   |
| ZBTB14         | 0.258243 | 6.66E-08    | 7541   |
| UBE4A          | 0.258223 | 6.68E-08    | 9354   |
| ZNF585A        | 0.258208 | 6.69E-08    | 199704 |
| NCK1           | 0.258189 | 6.71E-08    | 4690   |
| PSMD7          | 0.258175 | 6.72E-08    | 5713   |
| AP000866.1     | 0.258133 | 6.75E-08 NA |        |
| CEP83          | 0.258131 | 6.75E-08    | 51134  |
| FAF2           | 0.258131 | 6.75E-08    | 23197  |
| ENY2           | 0.258109 | 6.77E-08    | 56943  |
| NUDT13         | 0.258092 | 6.79E-08    | 25961  |
| RNASEH1        | 0.258084 | 6.79E-08    | 246243 |
| ZSCAN21        | 0.258059 | 6.81E-08    | 7589   |
| AMPD2          | 0.258045 | 6.83E-08    | 271    |
| DIRC3          | 0.258021 | 6.84E-08    | 729582 |
| NTRK1          | 0.257985 | 6.87E-08    | 4914   |
| PRKDC          | 0.257976 | 6.88E-08    | 5591   |
| ZNF518A        | 0.257948 | 6.91E-08    | 9849   |
| SLU7           | 0.257921 | 6.93E-08    | 10569  |
| TTC14          | 0.257893 | 6.95E-08    | 151613 |
| RGS8           | 0.257888 | 6.96E-08    | 85397  |
| UBAP2L         | 0.257886 | 6.96E-08    | 9898   |
| SEC24B         | 0.257753 | 7.07E-08    | 10427  |
| ARMCX6         | 0.257741 | 7.08E-08    | 54470  |
| NATD1          | 0.25773  | 7.09E-08    | 256302 |
| C7orf55-LUC7L2 | 0.257712 | 7.10E-08 NA |        |

|           |          |             |        |
|-----------|----------|-------------|--------|
| ZNF800    | 0.257709 | 7.11E-08    | 168850 |
| PTAR1     | 0.257588 | 7.21E-08    | 375743 |
| SLC33A1   | 0.257528 | 7.26E-08    | 9197   |
| AMMECR1   | 0.257528 | 7.26E-08    | 9949   |
| EXOC8     | 0.257526 | 7.27E-08    | 149371 |
| TMEM255A  | 0.257501 | 7.29E-08    | 55026  |
| SECISBP2L | 0.257487 | 7.30E-08    | 9728   |
| SLC25A53  | 0.257467 | 7.32E-08    | 401612 |
| ST7L      | 0.257442 | 7.34E-08    | 54879  |
| SLCO3A1   | 0.257429 | 7.35E-08    | 28232  |
| IQGAP1    | 0.25738  | 7.39E-08    | 8826   |
| PGF       | 0.257363 | 7.41E-08    | 5228   |
| TMEM167B  | 0.25736  | 7.41E-08    | 56900  |
| SNX9      | 0.257354 | 7.42E-08    | 51429  |
| PPP4R1    | 0.25733  | 7.44E-08    | 9989   |
| FAM186B   | 0.257326 | 7.44E-08    | 84070  |
| HINT3     | 0.25732  | 7.45E-08    | 135114 |
| CCDC92    | 0.257303 | 7.46E-08    | 80212  |
| RNF219    | 0.257289 | 7.48E-08 NA |        |
| SEC22B    | 0.257276 | 7.49E-08    | 9554   |
| SUMO2     | 0.257269 | 7.49E-08    | 6613   |
| CCDC173   | 0.25726  | 7.50E-08    | 129881 |
| TARSL2    | 0.257249 | 7.51E-08 NA |        |
| CCDC127   | 0.257229 | 7.53E-08    | 133957 |
| SEMA4D    | 0.257202 | 7.55E-08    | 10507  |
| SPTAN1    | 0.257172 | 7.58E-08    | 6709   |
| PAIP2     | 0.257153 | 7.60E-08    | 51247  |
| FOXP1     | 0.25708  | 7.67E-08    | 27086  |
| DVL3      | 0.257048 | 7.69E-08    | 1857   |
| PRPF40A   | 0.257001 | 7.74E-08    | 55660  |
| TBC1D20   | 0.256993 | 7.75E-08    | 128637 |
| SLC18A2   | 0.256965 | 7.77E-08    | 6571   |
| SALL4     | 0.256903 | 7.83E-08    | 57167  |
| IFNK      | 0.256889 | 7.84E-08    | 56832  |
| BST2      | 0.256849 | 7.88E-08    | 684    |
| KAT7      | 0.25684  | 7.89E-08    | 11143  |
| HNRNPA1L2 | 0.25684  | 7.89E-08    | 144983 |
| CWC27     | 0.256826 | 7.90E-08    | 10283  |
| FKBP1A    | 0.256749 | 7.98E-08    | 2280   |
| FAM89A    | 0.256745 | 7.98E-08    | 375061 |
| STAG3     | 0.256741 | 7.98E-08    | 10734  |
| FOXO3     | 0.256737 | 7.99E-08    | 2309   |
| E2F6      | 0.256707 | 8.02E-08    | 1876   |
| TCTN1     | 0.256701 | 8.02E-08    | 79600  |
| NPR1      | 0.256669 | 8.05E-08    | 4881   |
| SIX5      | 0.256655 | 8.07E-08    | 147912 |
| RELA      | 0.25662  | 8.10E-08    | 5970   |
| NKAPL     | 0.256605 | 8.12E-08    | 222698 |
| GNL1      | 0.256582 | 8.14E-08    | 2794   |
| UFSP2     | 0.256566 | 8.15E-08    | 55325  |
| NAF1      | 0.256544 | 8.17E-08    | 92345  |
| FAM126B   | 0.256531 | 8.19E-08    | 285172 |
| PI15      | 0.256511 | 8.21E-08    | 51050  |
| PDZD9     | 0.256474 | 8.24E-08    | 255762 |
| GOLGA5    | 0.25647  | 8.25E-08    | 9950   |
| C4orf26   | 0.256459 | 8.26E-08 NA |        |
| CCZ1      | 0.256427 | 8.29E-08    | 51622  |
| EXOC1     | 0.256418 | 8.30E-08    | 55763  |
| DGCR14    | 0.256367 | 8.35E-08 NA |        |
| NINJ1     | 0.256321 | 8.40E-08    | 4814   |

|            |          |          |           |
|------------|----------|----------|-----------|
| NRD1       | 0.256314 | 8.40E-08 | NA        |
| EPDR1      | 0.256254 | 8.46E-08 | 54749     |
| SOGA3      | 0.256223 | 8.50E-08 | 387104    |
| TBC1D8     | 0.256204 | 8.51E-08 | 11138     |
| C10orf2    | 0.256191 | 8.53E-08 | NA        |
| PRSS37     | 0.256155 | 8.56E-08 | 136242    |
| ZKSCAN1    | 0.256138 | 8.58E-08 | 7586      |
| TRPM7      | 0.256059 | 8.66E-08 | 54822     |
| DLEU1      | 0.256021 | 8.70E-08 | 10301     |
| TET2       | 0.255996 | 8.73E-08 | 54790     |
| MAP2K1     | 0.255957 | 8.77E-08 | 5604      |
| ERLEC1     | 0.255873 | 8.86E-08 | 27248     |
| MED6       | 0.255841 | 8.89E-08 | 10001     |
| POT1       | 0.255803 | 8.93E-08 | 25913     |
| POLH       | 0.255707 | 9.03E-08 | 5429      |
| ZNF623     | 0.255666 | 9.08E-08 | 9831      |
| AC010642.1 | 0.255665 | 9.08E-08 | NA        |
| C1orf109   | 0.25564  | 9.11E-08 | 54955     |
| RBM4B      | 0.255609 | 9.14E-08 | 83759     |
| LRIG1      | 0.255513 | 9.25E-08 | 26018     |
| RAD23B     | 0.255511 | 9.25E-08 | 5887      |
| OTOA       | 0.255464 | 9.30E-08 | 146183    |
| C14orf28   | 0.255459 | 9.31E-08 | 122525    |
| CDS2       | 0.255452 | 9.31E-08 | 8760      |
| MB21D2     | 0.25532  | 9.46E-08 | 151963    |
| YY2        | 0.255297 | 9.49E-08 | 404281    |
| HIATL1     | 0.255293 | 9.49E-08 | NA        |
| N4BP3      | 0.255254 | 9.54E-08 | 23138     |
| NAA50      | 0.255231 | 9.56E-08 | 80218     |
| GGPS1      | 0.255221 | 9.57E-08 | 9453      |
| ZSCAN22    | 0.255157 | 9.65E-08 | 342945    |
| MPHOSPH8   | 0.255152 | 9.65E-08 | 54737     |
| FCHO2      | 0.255102 | 9.71E-08 | 115548    |
| C6         | 0.25509  | 9.73E-08 | 729       |
| THRAP3     | 0.255083 | 9.73E-08 | 9967      |
| ZMAT2      | 0.255019 | 9.81E-08 | 153527    |
| CCDC62     | 0.255017 | 9.81E-08 | 84660     |
| SRSF11     | 0.254943 | 9.90E-08 | 9295      |
| TWF1       | 0.254937 | 9.90E-08 | 5756      |
| SETD2      | 0.254926 | 9.92E-08 | 29072     |
| MLANA      | 0.254903 | 9.94E-08 | 2315      |
| BFAR       | 0.254876 | 9.98E-08 | 51283     |
| RAB10      | 0.254873 | 9.98E-08 | 10890     |
| XG         | 0.254796 | 1.01E-07 | 7499      |
| TRMT44     | 0.254787 | 1.01E-07 | 152992    |
| NBPF10     | 0.254773 | 1.01E-07 | 100132406 |
| C6orf89    | 0.254724 | 1.02E-07 | 221477    |
| TRIM56     | 0.254689 | 1.02E-07 | 81844     |
| CNTN4      | 0.254683 | 1.02E-07 | 152330    |
| ZNF302     | 0.254615 | 1.03E-07 | 55900     |
| DMWD       | 0.254578 | 1.03E-07 | 1762      |
| FER1L5     | 0.254523 | 1.04E-07 | 90342     |
| AHI1       | 0.254522 | 1.04E-07 | 54806     |
| DPP9       | 0.254516 | 1.04E-07 | 91039     |
| FRMD5      | 0.25451  | 1.04E-07 | 84978     |
| PKN1       | 0.254507 | 1.04E-07 | 5585      |
| SLC35F6    | 0.25448  | 1.05E-07 | 54978     |
| HMG20A     | 0.254471 | 1.05E-07 | 10363     |
| XRCC5      | 0.254461 | 1.05E-07 | 7520      |
| KIAA0753   | 0.254438 | 1.05E-07 | 9851      |

|          |          |             |        |
|----------|----------|-------------|--------|
| RDH11    | 0.254422 | 1.05E-07    | 51109  |
| LACC1    | 0.254369 | 1.06E-07    | 144811 |
| ZNF611   | 0.254332 | 1.06E-07    | 81856  |
| BRD4     | 0.254331 | 1.06E-07    | 23476  |
| COPA     | 0.254289 | 1.07E-07    | 1314   |
| BAIAP2   | 0.254282 | 1.07E-07    | 10458  |
| REEP5    | 0.25428  | 1.07E-07    | 7905   |
| SPRR1A   | 0.254268 | 1.07E-07    | 6698   |
| ZNF398   | 0.254216 | 1.08E-07    | 57541  |
| ZNF540   | 0.254187 | 1.08E-07    | 163255 |
| MMS22L   | 0.254127 | 1.09E-07    | 253714 |
| GAN      | 0.25412  | 1.09E-07    | 8139   |
| GTPBP4   | 0.254102 | 1.09E-07    | 23560  |
| BTBD7    | 0.254018 | 1.10E-07    | 55727  |
| ZNF117   | 0.253992 | 1.11E-07    | 51351  |
| UGGT2    | 0.253981 | 1.11E-07    | 55757  |
| ZNF853   | 0.253944 | 1.11E-07    | 54753  |
| ORAI3    | 0.253936 | 1.12E-07    | 93129  |
| STAT5A   | 0.253917 | 1.12E-07    | 6776   |
| IPO9     | 0.253914 | 1.12E-07    | 55705  |
| C6orf1   | 0.253904 | 1.12E-07 NA |        |
| LPAR6    | 0.253886 | 1.12E-07    | 10161  |
| UBN2     | 0.253884 | 1.12E-07    | 254048 |
| PGR      | 0.253876 | 1.12E-07    | 5241   |
| SNX19    | 0.253846 | 1.13E-07    | 399979 |
| ATR      | 0.253834 | 1.13E-07    | 545    |
| RALGAPB  | 0.253823 | 1.13E-07    | 57148  |
| GPIHBP1  | 0.253816 | 1.13E-07    | 338328 |
| PORCN    | 0.253795 | 1.13E-07    | 64840  |
| U2SURP   | 0.253771 | 1.14E-07    | 23350  |
| PCDHB14  | 0.253759 | 1.14E-07    | 56122  |
| ZCCHC6   | 0.253731 | 1.14E-07 NA |        |
| ZNF678   | 0.253693 | 1.15E-07    | 339500 |
| TATDN1   | 0.253624 | 1.16E-07    | 83940  |
| MET      | 0.253605 | 1.16E-07    | 4233   |
| EDN1     | 0.253547 | 1.17E-07    | 1906   |
| TRMT10B  | 0.253537 | 1.17E-07    | 158234 |
| C1QC     | 0.253526 | 1.17E-07    | 714    |
| RHOA     | 0.253488 | 1.18E-07    | 387    |
| KIF7     | 0.253473 | 1.18E-07    | 374654 |
| SMIM3    | 0.25342  | 1.19E-07    | 85027  |
| ZNF878   | 0.253369 | 1.19E-07    | 729747 |
| PEX3     | 0.253334 | 1.20E-07    | 8504   |
| PPIC     | 0.25333  | 1.20E-07    | 5480   |
| UBD      | 0.253305 | 1.20E-07    | 10537  |
| ZNF275   | 0.2533   | 1.20E-07    | 10838  |
| TTN      | 0.253176 | 1.22E-07    | 7273   |
| C17orf49 | 0.253138 | 1.23E-07    | 124944 |
| ZACN     | 0.253097 | 1.23E-07    | 353174 |
| PDGFD    | 0.253096 | 1.23E-07    | 80310  |
| C9orf41  | 0.253089 | 1.23E-07 NA |        |
| SC5D     | 0.253079 | 1.23E-07    | 6309   |
| CAPNS2   | 0.253048 | 1.24E-07    | 84290  |
| IL12B    | 0.253037 | 1.24E-07    | 3593   |
| CBWD5    | 0.253031 | 1.24E-07    | 220869 |
| SLAIN2   | 0.25302  | 1.24E-07    | 57606  |
| TMEM182  | 0.252991 | 1.25E-07    | 130827 |
| TEAD2    | 0.252914 | 1.26E-07    | 8463   |
| KLHDC8B  | 0.2529   | 1.26E-07    | 200942 |
| NUP50    | 0.252891 | 1.26E-07    | 10762  |



|               |          |             |        |
|---------------|----------|-------------|--------|
| COA1          | 0.252838 | 1.27E-07    | 55744  |
| C8orf37       | 0.252831 | 1.27E-07    | 157657 |
| DNAJC14       | 0.252827 | 1.27E-07    | 85406  |
| CENPP         | 0.252826 | 1.27E-07    | 401541 |
| HNRNPH3       | 0.252718 | 1.29E-07    | 3189   |
| FAM71D        | 0.252704 | 1.29E-07    | 161142 |
| SLC26A5       | 0.252688 | 1.29E-07    | 375611 |
| PHGR1         | -0.25268 | 1.29E-07    | 644844 |
| C4orf46       | 0.252641 | 1.30E-07    | 201725 |
| DPF2          | 0.252639 | 1.30E-07    | 5977   |
| KDM1A         | 0.252633 | 1.30E-07    | 23028  |
| KCTD18        | 0.252622 | 1.30E-07    | 130535 |
| GRB2          | 0.252605 | 1.31E-07    | 2885   |
| SH3GLB1       | 0.252602 | 1.31E-07    | 51100  |
| RND3          | 0.2526   | 1.31E-07    | 390    |
| GTF3C1        | 0.252564 | 1.31E-07    | 2975   |
| SERTAD2       | 0.252529 | 1.32E-07    | 9792   |
| TFCP2         | 0.252474 | 1.33E-07    | 7024   |
| ZNF791        | 0.252449 | 1.33E-07    | 163049 |
| ZNF23         | 0.252425 | 1.33E-07    | 7571   |
| DHX9          | 0.252371 | 1.34E-07    | 1660   |
| FUT10         | 0.252356 | 1.34E-07    | 84750  |
| FAM81B        | 0.252295 | 1.35E-07    | 153643 |
| MBTD1         | 0.252287 | 1.36E-07    | 54799  |
| SEN5          | 0.252259 | 1.36E-07    | 205564 |
| RNF11         | 0.252251 | 1.36E-07    | 26994  |
| GCFC2         | 0.252251 | 1.36E-07    | 6936   |
| CCDC28B       | 0.252244 | 1.36E-07    | 79140  |
| SNIP1         | 0.252209 | 1.37E-07    | 79753  |
| ITGAL         | 0.252195 | 1.37E-07    | 3683   |
| TMA16         | 0.252194 | 1.37E-07    | 55319  |
| ZNF680        | 0.252127 | 1.38E-07    | 340252 |
| C6orf163      | 0.252078 | 1.39E-07    | 206412 |
| SRP72         | 0.252013 | 1.40E-07    | 6731   |
| KEL           | 0.251993 | 1.40E-07    | 3792   |
| E2F3          | 0.251926 | 1.41E-07    | 1871   |
| TRRAP         | 0.251907 | 1.42E-07    | 8295   |
| ZNF652        | 0.251862 | 1.42E-07    | 22834  |
| KATNA1        | 0.25186  | 1.43E-07    | 11104  |
| COBLL1        | 0.251852 | 1.43E-07    | 22837  |
| RP11-295P9.3  | 0.251848 | 1.43E-07 NA |        |
| TAF6          | 0.251828 | 1.43E-07    | 6878   |
| XIAP          | 0.251799 | 1.44E-07    | 331    |
| SPDL1         | 0.251797 | 1.44E-07    | 54908  |
| LA16c-306E5.2 | 0.251695 | 1.45E-07 NA |        |
| NMUR1         | 0.251677 | 1.46E-07    | 10316  |
| PAPD4         | 0.251669 | 1.46E-07 NA |        |
| UBN1          | 0.251636 | 1.46E-07    | 29855  |
| C9orf78       | 0.251622 | 1.47E-07    | 51759  |
| USP4          | 0.25162  | 1.47E-07    | 7375   |
| ELL           | 0.251617 | 1.47E-07    | 8178   |
| JADE1         | 0.251599 | 1.47E-07    | 79960  |
| ABHD8         | 0.251586 | 1.47E-07    | 79575  |
| USP45         | 0.251552 | 1.48E-07    | 85015  |
| THRSP         | 0.251481 | 1.49E-07    | 7069   |
| MAK           | 0.251467 | 1.49E-07    | 4117   |
| SFPQ          | 0.251438 | 1.50E-07    | 6421   |
| UBR3          | 0.251434 | 1.50E-07    | 130507 |
| OSGEPL1       | 0.251417 | 1.50E-07    | 64172  |
| MMGT1         | 0.251376 | 1.51E-07    | 93380  |

|               |          |             |           |
|---------------|----------|-------------|-----------|
| TTC8          | 0.251367 | 1.51E-07    | 123016    |
| CDYL          | 0.251359 | 1.51E-07    | 9425      |
| FAM69C        | 0.251352 | 1.51E-07 NA |           |
| TRMT5         | 0.251347 | 1.51E-07    | 57570     |
| EIF4G2        | 0.251339 | 1.51E-07    | 1982      |
| EIF4B         | 0.251337 | 1.52E-07    | 1975      |
| KATNBL1       | 0.251332 | 1.52E-07    | 79768     |
| C17orf80      | 0.251328 | 1.52E-07    | 55028     |
| RIOK1         | 0.25132  | 1.52E-07    | 83732     |
| GPBP1         | 0.251317 | 1.52E-07    | 65056     |
| CBLL1         | 0.2513   | 1.52E-07    | 79872     |
| RBL2          | 0.251296 | 1.52E-07    | 5934      |
| ING1          | 0.251244 | 1.53E-07    | 3621      |
| HUWE1         | 0.251244 | 1.53E-07    | 10075     |
| AKIRIN2       | 0.251228 | 1.53E-07    | 55122     |
| PCDHGC4       | 0.251158 | 1.55E-07    | 56098     |
| PKP4          | 0.251151 | 1.55E-07    | 8502      |
| PAPD5         | 0.251145 | 1.55E-07 NA |           |
| RBM8A         | 0.251134 | 1.55E-07    | 9939      |
| ZNF559-ZNF177 | 0.251114 | 1.56E-07    | 100529215 |
| GPR174        | 0.251107 | 1.56E-07    | 84636     |
| DENR          | 0.251087 | 1.56E-07    | 8562      |
| ATAD5         | 0.251076 | 1.56E-07    | 79915     |
| KHDRBS1       | 0.251048 | 1.57E-07    | 10657     |
| ATP6V0A2      | 0.251045 | 1.57E-07    | 23545     |
| C11orf68      | 0.251039 | 1.57E-07    | 83638     |
| C17orf104     | 0.250971 | 1.58E-07 NA |           |
| C1D           | 0.25093  | 1.59E-07    | 10438     |
| ID1           | -0.25089 | 1.60E-07    | 3397      |
| AL139333.1    | 0.250875 | 1.60E-07 NA |           |
| RNASE6        | 0.25087  | 1.60E-07    | 6039      |
| CFAP36        | 0.25081  | 1.61E-07    | 112942    |
| SRCAP         | 0.250773 | 1.62E-07    | 10847     |
| FZD3          | 0.250773 | 1.62E-07    | 7976      |
| RAG1          | 0.250728 | 1.63E-07    | 5896      |
| C2orf76       | 0.250698 | 1.63E-07    | 130355    |
| MSL2          | 0.250683 | 1.64E-07    | 55167     |
| MED15         | 0.25067  | 1.64E-07    | 51586     |
| KMT2D         | 0.250528 | 1.67E-07    | 8085      |
| APP           | 0.250522 | 1.67E-07    | 351       |
| VAMP5         | 0.250499 | 1.67E-07    | 10791     |
| LRRC40        | 0.250495 | 1.67E-07    | 55631     |
| ZCWPW2        | 0.250473 | 1.68E-07    | 152098    |
| FAM35A        | 0.250425 | 1.69E-07 NA |           |
| NUP210L       | 0.250405 | 1.69E-07    | 91181     |
| RAB28         | 0.250399 | 1.69E-07    | 9364      |
| PRRC2B        | 0.250397 | 1.69E-07    | 84726     |
| GPR146        | 0.250374 | 1.70E-07    | 115330    |
| SAMD11        | 0.250362 | 1.70E-07    | 148398    |
| AAK1          | 0.250342 | 1.70E-07    | 22848     |
| UTP20         | 0.250315 | 1.71E-07    | 27340     |
| MORF4L2       | 0.250229 | 1.72E-07    | 9643      |
| ASCC3         | 0.250224 | 1.73E-07    | 10973     |
| NUP62         | 0.250211 | 1.73E-07    | 23636     |
| GVQW1         | 0.250194 | 1.73E-07 NA |           |
| STAG1         | 0.250175 | 1.74E-07    | 10274     |
| ITK           | 0.250121 | 1.75E-07    | 3702      |
| IQCH          | 0.250071 | 1.76E-07    | 64799     |
| PIIP5K2       | 0.250056 | 1.76E-07    | 23262     |
| UEVLD         | 0.250034 | 1.76E-07    | 55293     |

|             |          |             |           |
|-------------|----------|-------------|-----------|
| KCNH7       | 0.250009 | 1.77E-07    | 90134     |
| VPRBP       | 0.249968 | 1.78E-07 NA |           |
| EPHB4       | 0.249939 | 1.78E-07    | 2050      |
| TECPR2      | 0.249929 | 1.79E-07    | 9895      |
| ZNF846      | 0.249883 | 1.80E-07    | 162993    |
| CELSR1      | 0.249831 | 1.81E-07    | 9620      |
| ZFP69       | 0.249827 | 1.81E-07    | 339559    |
| IFNG        | 0.249813 | 1.81E-07    | 3458      |
| MFN1        | 0.24981  | 1.81E-07    | 55669     |
| SCFD1       | 0.249765 | 1.82E-07    | 23256     |
| ADCYAP1     | 0.24967  | 1.84E-07    | 116       |
| KIF2A       | 0.249568 | 1.86E-07    | 3796      |
| ZNF547      | 0.24955  | 1.87E-07    | 284306    |
| ZNF268      | 0.249531 | 1.87E-07    | 10795     |
| WDR48       | 0.249528 | 1.87E-07    | 57599     |
| FNTA        | 0.249522 | 1.87E-07    | 2339      |
| ZNF462      | 0.249505 | 1.88E-07    | 58499     |
| SMG9        | 0.249491 | 1.88E-07    | 56006     |
| LRRC4       | 0.249487 | 1.88E-07    | 64101     |
| IQCK        | 0.249486 | 1.88E-07    | 124152    |
| NEDD4       | 0.24947  | 1.88E-07    | 4734      |
| OSTC        | 0.249458 | 1.89E-07    | 58505     |
| TMEM78      | 0.249425 | 1.89E-07    | 677790    |
| RBM7        | 0.249414 | 1.90E-07    | 10179     |
| SPCS2       | 0.249399 | 1.90E-07    | 9789      |
| PIBF1       | 0.249399 | 1.90E-07    | 10464     |
| ARMC10      | 0.249388 | 1.90E-07    | 83787     |
| AFF1        | 0.249387 | 1.90E-07    | 4299      |
| IMMP1L      | 0.249338 | 1.91E-07    | 196294    |
| RAB5C       | 0.249326 | 1.92E-07    | 5878      |
| DNAJB7      | 0.249315 | 1.92E-07    | 150353    |
| DCTN4       | 0.249308 | 1.92E-07    | 51164     |
| THOC2       | 0.249292 | 1.92E-07    | 57187     |
| STAT3       | 0.249287 | 1.92E-07    | 6774      |
| ITCH        | 0.249279 | 1.93E-07    | 83737     |
| HAUS2       | 0.249212 | 1.94E-07    | 55142     |
| EIF3E       | 0.249204 | 1.94E-07    | 3646      |
| SUN1        | 0.249146 | 1.96E-07    | 23353     |
| ARL8A       | 0.249114 | 1.96E-07    | 127829    |
| ZMYM1       | 0.249073 | 1.97E-07    | 79830     |
| SRP54       | 0.249038 | 1.98E-07    | 6729      |
| ACTRT3      | 0.249033 | 1.98E-07    | 84517     |
| BCORL1      | 0.249019 | 1.99E-07    | 63035     |
| WHSC1L1     | 0.249012 | 1.99E-07 NA |           |
| PCDHGA5     | 0.248962 | 2.00E-07    | 56110     |
| FSD1L       | 0.248952 | 2.00E-07    | 83856     |
| ISCA1       | 0.248949 | 2.00E-07    | 81689     |
| LRRC69      | 0.248947 | 2.00E-07    | 100130742 |
| BCOR        | 0.248929 | 2.01E-07    | 54880     |
| APOL6       | 0.248912 | 2.01E-07    | 80830     |
| ABI3        | 0.248892 | 2.02E-07    | 51225     |
| ZNF391      | 0.248834 | 2.03E-07    | 346157    |
| SHQ1        | 0.248832 | 2.03E-07    | 55164     |
| BRD3        | 0.248827 | 2.03E-07    | 8019      |
| PPP3R1      | 0.248789 | 2.04E-07    | 5534      |
| PELI1       | 0.248787 | 2.04E-07    | 57162     |
| SEMA3G      | 0.248735 | 2.05E-07    | 56920     |
| RP11-11N7.5 | 0.248711 | 2.06E-07 NA |           |
| HSPA5       | 0.248703 | 2.06E-07    | 3309      |
| MCL1        | 0.248646 | 2.07E-07    | 4170      |

|               |          |             |        |
|---------------|----------|-------------|--------|
| PLK2          | 0.248633 | 2.08E-07    | 10769  |
| C19orf12      | 0.248599 | 2.08E-07    | 83636  |
| HECTD4        | 0.248568 | 2.09E-07    | 283450 |
| DAPK3         | 0.248543 | 2.10E-07    | 1613   |
| FAM20B        | 0.248531 | 2.10E-07    | 9917   |
| RNF20         | 0.248518 | 2.10E-07    | 56254  |
| IL1B          | 0.248514 | 2.11E-07    | 3553   |
| ZKSCAN3       | 0.24847  | 2.12E-07    | 80317  |
| FAT1          | 0.248457 | 2.12E-07    | 2195   |
| RPE           | 0.248446 | 2.12E-07    | 6120   |
| ZNF248        | 0.248442 | 2.12E-07    | 57209  |
| MED20         | 0.248441 | 2.12E-07    | 9477   |
| SMAP2         | 0.248434 | 2.12E-07    | 64744  |
| RCVRN         | 0.248428 | 2.13E-07    | 5957   |
| CD28          | 0.248357 | 2.14E-07    | 940    |
| CCNT2         | 0.248344 | 2.15E-07    | 905    |
| PRSS53        | 0.248342 | 2.15E-07    | 339105 |
| SLC25A46      | 0.248303 | 2.16E-07    | 91137  |
| DAPP1         | 0.2483   | 2.16E-07    | 27071  |
| ZFC3H1        | 0.248266 | 2.17E-07    | 196441 |
| TMEM91        | 0.248257 | 2.17E-07    | 641649 |
| PAQR7         | 0.248254 | 2.17E-07    | 164091 |
| ZNF599        | 0.248234 | 2.17E-07    | 148103 |
| DHFRL1        | 0.248227 | 2.18E-07 NA |        |
| PDLIM3        | 0.248212 | 2.18E-07    | 27295  |
| WWP1          | 0.248172 | 2.19E-07    | 11059  |
| CLDN1         | 0.248146 | 2.20E-07    | 9076   |
| NUP160        | 0.248143 | 2.20E-07    | 23279  |
| N4BP2L2       | 0.248141 | 2.20E-07    | 10443  |
| CEBPZ         | 0.248121 | 2.20E-07    | 10153  |
| ALG13         | 0.248098 | 2.21E-07    | 79868  |
| METTL15       | 0.248086 | 2.21E-07    | 196074 |
| VIPAS39       | 0.248086 | 2.21E-07    | 63894  |
| MDC1          | 0.248063 | 2.22E-07    | 9656   |
| RPL7L1        | 0.247924 | 2.25E-07    | 285855 |
| CREBZF        | 0.247906 | 2.26E-07    | 58487  |
| EPS15L1       | 0.247906 | 2.26E-07    | 58513  |
| CKLF          | 0.247897 | 2.26E-07    | 51192  |
| EXOC6B        | 0.24788  | 2.27E-07    | 23233  |
| GTPBP8        | 0.247828 | 2.28E-07    | 29083  |
| TBX21         | 0.247813 | 2.28E-07    | 30009  |
| ZNF277        | 0.247764 | 2.30E-07    | 11179  |
| MBD4          | 0.247755 | 2.30E-07    | 8930   |
| PLAA          | 0.247736 | 2.30E-07    | 9373   |
| SLC16A10      | 0.247731 | 2.30E-07    | 117247 |
| PDS5A         | 0.247631 | 2.33E-07    | 23244  |
| FBXL5         | 0.247602 | 2.34E-07    | 26234  |
| MEF2BNB-MEF2B | 0.247578 | 2.35E-07 NA |        |
| GLCCI1        | 0.247567 | 2.35E-07    | 113263 |
| ZNF81         | 0.247546 | 2.35E-07    | 347344 |
| SERPINB8      | 0.247535 | 2.36E-07    | 5271   |
| WIZ           | 0.247496 | 2.37E-07    | 58525  |
| GRK5          | 0.247472 | 2.37E-07    | 2869   |
| FAM19A2       | 0.247466 | 2.38E-07 NA |        |
| NR2F1         | 0.247465 | 2.38E-07    | 7025   |
| HECTD1        | 0.247464 | 2.38E-07    | 25831  |
| QTRTD1        | 0.247421 | 2.39E-07 NA |        |
| CCDC181       | 0.247412 | 2.39E-07    | 57821  |
| CCDC134       | 0.247407 | 2.39E-07    | 79879  |
| CD200R1       | 0.247401 | 2.39E-07    | 131450 |

|           |          |             |        |
|-----------|----------|-------------|--------|
| EIF4ENIF1 | 0.247399 | 2.39E-07    | 56478  |
| CEP89     | 0.247397 | 2.40E-07    | 84902  |
| UFD1L     | 0.247371 | 2.40E-07 NA |        |
| SSB       | 0.247369 | 2.40E-07    | 6741   |
| IBTK      | 0.24736  | 2.41E-07    | 25998  |
| GOSR2     | 0.247304 | 2.42E-07    | 9570   |
| LCLAT1    | 0.247303 | 2.42E-07    | 253558 |
| TRUB1     | 0.247276 | 2.43E-07    | 142940 |
| LHX6      | 0.247266 | 2.43E-07    | 26468  |
| ZNF222    | 0.247211 | 2.45E-07    | 7673   |
| FBXO21    | 0.247152 | 2.46E-07    | 23014  |
| RARS2     | 0.24712  | 2.47E-07    | 57038  |
| ADPGK     | 0.247082 | 2.48E-07    | 83440  |
| HNRNPC    | 0.247031 | 2.50E-07    | 3183   |
| ZNF671    | 0.247015 | 2.50E-07    | 79891  |
| ANKRD2    | 0.247015 | 2.50E-07    | 26287  |
| POFUT2    | 0.246999 | 2.51E-07    | 23275  |
| LARP7     | 0.24697  | 2.52E-07    | 51574  |
| ZNF567    | 0.246931 | 2.53E-07    | 163081 |
| RIMS1     | 0.246904 | 2.54E-07    | 22999  |
| GPR52     | 0.246863 | 2.55E-07    | 9293   |
| KIAA0922  | 0.246849 | 2.55E-07 NA |        |
| TNNI3K    | 0.246839 | 2.55E-07    | 51086  |
| BET1      | 0.246811 | 2.56E-07    | 10282  |
| ZNF280B   | 0.246774 | 2.57E-07    | 140883 |
| ULK2      | 0.246738 | 2.58E-07    | 9706   |
| IPO8      | 0.24672  | 2.59E-07    | 10526  |
| PCDHGB5   | 0.246707 | 2.59E-07    | 56101  |
| BAZ2A     | 0.246696 | 2.60E-07    | 11176  |
| NUDT21    | 0.246685 | 2.60E-07    | 11051  |
| DNAJC27   | 0.246656 | 2.61E-07    | 51277  |
| SAP30     | 0.246612 | 2.62E-07    | 8819   |
| CCT6A     | 0.246601 | 2.63E-07    | 908    |
| CUL7      | 0.246578 | 2.63E-07    | 9820   |
| DCC       | 0.246572 | 2.63E-07    | 1630   |
| ALG11     | 0.246546 | 2.64E-07    | 440138 |
| SFSWAP    | 0.246529 | 2.65E-07    | 6433   |
| SPON1     | 0.246518 | 2.65E-07    | 10418  |
| ZKSCAN4   | 0.246512 | 2.65E-07    | 387032 |
| STT3A     | 0.246494 | 2.66E-07    | 3703   |
| ZFP57     | 0.246488 | 2.66E-07    | 346171 |
| TCEA1     | 0.246428 | 2.68E-07    | 6917   |
| ZSCAN12   | 0.24637  | 2.70E-07    | 9753   |
| ZNF665    | 0.246362 | 2.70E-07    | 79788  |
| PEX13     | 0.246351 | 2.70E-07    | 5194   |
| WDR89     | 0.246343 | 2.70E-07    | 112840 |
| TLR4      | 0.246332 | 2.71E-07    | 7099   |
| KLHL41    | 0.24632  | 2.71E-07    | 10324  |
| TMEM241   | 0.246309 | 2.71E-07    | 85019  |
| TGM3      | 0.246286 | 2.72E-07    | 7053   |
| TYW3      | 0.246269 | 2.73E-07    | 127253 |
| NUDT11    | 0.24625  | 2.73E-07    | 55190  |
| LTA4H     | 0.246243 | 2.73E-07    | 4048   |
| ZNF80     | 0.246202 | 2.75E-07    | 7634   |
| PDE8B     | 0.246161 | 2.76E-07    | 8622   |
| PRDM10    | 0.246121 | 2.77E-07    | 56980  |
| TRMT1L    | 0.246047 | 2.80E-07    | 81627  |
| RAB11FIP3 | 0.246037 | 2.80E-07    | 9727   |
| UXS1      | 0.245939 | 2.83E-07    | 80146  |
| ZC3H15    | 0.245857 | 2.86E-07    | 55854  |

|               |          |             |        |
|---------------|----------|-------------|--------|
| TTPAL         | 0.245853 | 2.86E-07    | 79183  |
| UBA3          | 0.245847 | 2.86E-07    | 9039   |
| TPD52L2       | 0.245819 | 2.87E-07    | 7165   |
| MBTPS1        | 0.245807 | 2.88E-07    | 8720   |
| SET           | 0.245788 | 2.88E-07    | 6418   |
| CD81          | 0.245772 | 2.89E-07    | 975    |
| DDX10         | 0.245767 | 2.89E-07    | 1662   |
| CBX5          | 0.245764 | 2.89E-07    | 23468  |
| MIER2         | 0.245674 | 2.92E-07    | 54531  |
| CADPS2        | 0.245654 | 2.93E-07    | 93664  |
| KMT2E         | 0.24563  | 2.93E-07    | 55904  |
| MDM4          | 0.245568 | 2.95E-07    | 4194   |
| EXOC4         | 0.245537 | 2.97E-07    | 60412  |
| ZMAT5         | 0.245516 | 2.97E-07    | 55954  |
| ENO4          | 0.245447 | 3.00E-07    | 387712 |
| QRICH1        | 0.245437 | 3.00E-07    | 54870  |
| FAM217B       | 0.245433 | 3.00E-07    | 63939  |
| PCDHGA6       | 0.245406 | 3.01E-07    | 56109  |
| SPIDR         | 0.245379 | 3.02E-07    | 23514  |
| ZNF318        | 0.245379 | 3.02E-07    | 24149  |
| PTPRQ         | 0.245371 | 3.02E-07    | 374462 |
| AQP1          | 0.245348 | 3.03E-07    | 358    |
| CTD-2574D22.6 | 0.245333 | 3.04E-07 NA |        |
| JADE2         | 0.245294 | 3.05E-07    | 23338  |
| ANXA2         | 0.245249 | 3.06E-07    | 302    |
| IFT46         | 0.245211 | 3.08E-07    | 56912  |
| ZFYVE1        | 0.245194 | 3.08E-07    | 53349  |
| ECT2L         | 0.245168 | 3.09E-07    | 345930 |
| DCLRE1B       | 0.245146 | 3.10E-07    | 64858  |
| MAPK1         | 0.245112 | 3.11E-07    | 5594   |
| AGO1          | 0.245105 | 3.12E-07    | 26523  |
| TM2D3         | 0.245083 | 3.12E-07    | 80213  |
| TLL1          | 0.245063 | 3.13E-07    | 7092   |
| TMEM158       | 0.245008 | 3.15E-07    | 25907  |
| LLPH          | 0.244974 | 3.16E-07    | 84298  |
| GIN1          | 0.24494  | 3.17E-07    | 54826  |
| LIMCH1        | 0.244934 | 3.18E-07    | 22998  |
| XPO4          | 0.244915 | 3.18E-07    | 64328  |
| PIGM          | 0.244886 | 3.19E-07    | 93183  |
| ARHGEF1       | 0.244881 | 3.20E-07    | 9138   |
| ARG1          | 0.244877 | 3.20E-07    | 383    |
| RAPGEF1       | 0.244873 | 3.20E-07    | 2889   |
| ASF1A         | 0.244865 | 3.20E-07    | 25842  |
| SMC4          | 0.244851 | 3.21E-07    | 10051  |
| CRIP1         | 0.244836 | 3.21E-07    | 9419   |
| SIX1          | 0.244757 | 3.24E-07    | 6495   |
| SLC22A3       | 0.244749 | 3.24E-07    | 6581   |
| HEATR5B       | 0.244733 | 3.25E-07    | 54497  |
| LCAT          | 0.244697 | 3.26E-07    | 3931   |
| LYRM2         | 0.244678 | 3.27E-07    | 57226  |
| GTPBP10       | 0.244672 | 3.27E-07    | 85865  |
| ZNF550        | 0.244668 | 3.27E-07    | 162972 |
| CBX3          | 0.244665 | 3.28E-07    | 11335  |
| EID2          | 0.244662 | 3.28E-07    | 163126 |
| C5orf28       | 0.244655 | 3.28E-07 NA |        |
| CCDC67        | 0.244612 | 3.30E-07 NA |        |
| B4GALT5       | 0.244606 | 3.30E-07    | 9334   |
| CFAP61        | 0.244511 | 3.33E-07    | 26074  |
| RNF144B       | 0.244503 | 3.34E-07    | 255488 |
| SGCB          | 0.24449  | 3.34E-07    | 6443   |

|             |          |             |           |
|-------------|----------|-------------|-----------|
| DCTN5       | 0.244436 | 3.36E-07    | 84516     |
| GALNT10     | 0.244408 | 3.37E-07    | 55568     |
| VPS26A      | 0.244402 | 3.38E-07    | 9559      |
| SIK3        | 0.244387 | 3.38E-07    | 23387     |
| UTP6        | 0.244373 | 3.39E-07    | 55813     |
| PTGS2       | 0.244371 | 3.39E-07    | 5743      |
| MPHOSPH6    | 0.244299 | 3.41E-07    | 10200     |
| HFE         | 0.244296 | 3.42E-07    | 3077      |
| LRRC46      | 0.244295 | 3.42E-07    | 90506     |
| ZFHX2       | 0.244286 | 3.42E-07    | 85446     |
| CALCOCO1    | 0.244257 | 3.43E-07    | 57658     |
| RTN4        | 0.24425  | 3.43E-07    | 57142     |
| PPP2R3C     | 0.24423  | 3.44E-07    | 55012     |
| TNFRSF1B    | 0.244229 | 3.44E-07    | 7133      |
| RCOR3       | 0.244187 | 3.46E-07    | 55758     |
| EOMES       | 0.244186 | 3.46E-07    | 8320      |
| KAT6B       | 0.244174 | 3.46E-07    | 23522     |
| NR2C2       | 0.244166 | 3.47E-07    | 7182      |
| HNRNPK      | 0.244157 | 3.47E-07    | 3190      |
| TERF2       | 0.244107 | 3.49E-07    | 7014      |
| CCDC40      | 0.244069 | 3.51E-07    | 55036     |
| ZNF616      | 0.244041 | 3.52E-07    | 90317     |
| KBTBD7      | 0.244031 | 3.52E-07    | 84078     |
| HIATL2      | 0.243998 | 3.53E-07 NA |           |
| ARL15       | 0.243995 | 3.54E-07    | 54622     |
| KCND1       | 0.243987 | 3.54E-07    | 3750      |
| UBE2V2      | 0.243983 | 3.54E-07    | 7336      |
| ZNF35       | 0.24396  | 3.55E-07    | 7584      |
| RBAK-RBAKDN | 0.243952 | 3.55E-07    | 100533952 |
| ECD         | 0.243952 | 3.55E-07    | 11319     |
| PCBP3       | 0.24391  | 3.57E-07    | 54039     |
| PAWR        | 0.2439   | 3.57E-07    | 5074      |
| KIAA0391    | 0.243867 | 3.59E-07 NA |           |
| COTL1       | 0.243854 | 3.59E-07    | 23406     |
| KIAA1407    | 0.243841 | 3.60E-07 NA |           |
| FAM209B     | 0.243819 | 3.61E-07    | 388799    |
| ZNF836      | 0.24381  | 3.61E-07    | 162962    |
| GOLGA6L4    | 0.243801 | 3.61E-07    | 643707    |
| MRPS10      | 0.243751 | 3.63E-07    | 55173     |
| RDH10       | 0.243741 | 3.64E-07    | 157506    |
| GLRA3       | 0.243738 | 3.64E-07    | 8001      |
| CBWD1       | 0.243731 | 3.64E-07    | 55871     |
| ZBTB8B      | 0.243697 | 3.66E-07    | 728116    |
| ETV5        | 0.243641 | 3.68E-07    | 2119      |
| EFCAB13     | 0.243566 | 3.71E-07    | 124989    |
| ZC3H7B      | 0.243565 | 3.71E-07    | 23264     |
| GLUL        | 0.243543 | 3.72E-07    | 2752      |
| PIP5K1C     | 0.243517 | 3.73E-07    | 23396     |
| ZMPSTE24    | 0.243453 | 3.76E-07    | 10269     |
| PLIN2       | 0.243446 | 3.76E-07    | 123       |
| SPTBN1      | 0.243443 | 3.76E-07    | 6711      |
| SPOP        | 0.24344  | 3.76E-07    | 8405      |
| SART3       | 0.24341  | 3.78E-07    | 9733      |
| SEC24C      | 0.243409 | 3.78E-07    | 9632      |
| ANKRD13C    | 0.243376 | 3.79E-07    | 81573     |
| FERMT3      | 0.243363 | 3.80E-07    | 83706     |
| ACTBL2      | 0.243358 | 3.80E-07    | 345651    |
| SF3A3       | 0.243332 | 3.81E-07    | 10946     |
| KIAA1715    | 0.243289 | 3.83E-07 NA |           |
| TAF1        | 0.243281 | 3.83E-07    | 6872      |

|               |          |             |        |
|---------------|----------|-------------|--------|
| ANKRD28       | 0.243226 | 3.86E-07    | 23243  |
| METAP2        | 0.243212 | 3.86E-07    | 10988  |
| ZNF589        | 0.243168 | 3.88E-07    | 51385  |
| CTBS          | 0.243163 | 3.88E-07    | 1486   |
| GBP2          | 0.243158 | 3.89E-07    | 2634   |
| LTN1          | 0.243147 | 3.89E-07    | 26046  |
| BTBD11        | 0.243117 | 3.90E-07    | 121551 |
| R3HDM1        | 0.24309  | 3.92E-07    | 23518  |
| CCDC43        | 0.243019 | 3.95E-07    | 124808 |
| TIFA          | 0.243016 | 3.95E-07    | 92610  |
| CEP41         | 0.243012 | 3.95E-07    | 95681  |
| KIAA1841      | 0.242968 | 3.97E-07    | 84542  |
| SPATA13       | 0.242923 | 3.99E-07    | 221178 |
| SNTB1         | 0.24288  | 4.01E-07    | 6641   |
| CFHR3         | 0.242872 | 4.01E-07    | 10878  |
| SYDE2         | 0.242832 | 4.03E-07    | 84144  |
| DOPEY1        | 0.242828 | 4.03E-07 NA |        |
| PCGF5         | 0.242793 | 4.05E-07    | 84333  |
| ARHGEF7       | 0.24275  | 4.07E-07    | 8874   |
| BRD2          | 0.242716 | 4.09E-07    | 6046   |
| TMEM140       | 0.242707 | 4.09E-07    | 55281  |
| RP11-545J16.1 | 0.242707 | 4.09E-07 NA |        |
| HLA-DPA1      | 0.242688 | 4.10E-07    | 3113   |
| OPRL1         | 0.242679 | 4.10E-07    | 4987   |
| PXYLP1        | 0.242669 | 4.11E-07    | 92370  |
| FAM76A        | 0.242659 | 4.11E-07    | 199870 |
| DNAJB11       | 0.24264  | 4.12E-07    | 51726  |
| TACC1         | 0.242626 | 4.13E-07    | 6867   |
| GALNT5        | 0.242578 | 4.15E-07    | 11227  |
| RWDD1         | 0.242573 | 4.15E-07    | 51389  |
| CDADC1        | 0.242557 | 4.16E-07    | 81602  |
| NKTR          | 0.242534 | 4.17E-07    | 4820   |
| ALOX12        | 0.242508 | 4.18E-07    | 239    |
| MYLK4         | 0.242478 | 4.20E-07    | 340156 |
| SPOPL         | 0.242471 | 4.20E-07    | 339745 |
| SYNE2         | 0.242468 | 4.20E-07    | 23224  |
| SLC10A5       | 0.242424 | 4.22E-07    | 347051 |
| RIMBP3        | 0.242375 | 4.25E-07    | 85376  |
| HNRNPH2       | 0.242326 | 4.27E-07    | 3188   |
| KDM2B         | 0.24231  | 4.28E-07    | 84678  |
| PSIP1         | 0.242299 | 4.28E-07    | 11168  |
| KCNJ1         | 0.242241 | 4.31E-07    | 3758   |
| ZSCAN26       | 0.242158 | 4.35E-07    | 7741   |
| ANAPC13       | 0.242147 | 4.36E-07    | 25847  |
| CLHC1         | 0.242125 | 4.37E-07    | 130162 |
| RWDD4         | 0.242116 | 4.37E-07    | 201965 |
| ZNF496        | 0.242113 | 4.37E-07    | 84838  |
| COPS7A        | 0.242104 | 4.38E-07    | 50813  |
| NCOA7         | 0.242077 | 4.39E-07    | 135112 |
| SPIRE1        | 0.242059 | 4.40E-07    | 56907  |
| H3F3B         | 0.24203  | 4.41E-07 NA |        |
| SSX2IP        | 0.242023 | 4.42E-07    | 117178 |
| SAMD12        | 0.242013 | 4.42E-07    | 401474 |
| DYRK1A        | 0.241989 | 4.43E-07    | 1859   |
| LARP1         | 0.241987 | 4.44E-07    | 23367  |
| RNF168        | 0.241951 | 4.45E-07    | 165918 |
| AHNAK         | 0.241938 | 4.46E-07    | 79026  |
| ZBED5         | 0.241908 | 4.48E-07    | 58486  |
| CEP295        | 0.241879 | 4.49E-07    | 85459  |
| PTK7          | 0.241865 | 4.50E-07    | 5754   |



|               |          |             |        |
|---------------|----------|-------------|--------|
| CSNK1A1       | 0.241865 | 4.50E-07    | 1452   |
| EED           | 0.241863 | 4.50E-07    | 8726   |
| STXBP3        | 0.241859 | 4.50E-07    | 6814   |
| PIK3CD        | 0.241858 | 4.50E-07    | 5293   |
| RALA          | 0.241845 | 4.51E-07    | 5898   |
| NFIA          | 0.241829 | 4.52E-07    | 4774   |
| RP11-571M6.15 | 0.241797 | 4.53E-07 NA |        |
| DMXL1         | 0.241792 | 4.53E-07    | 1657   |
| TAF9B         | 0.241779 | 4.54E-07    | 51616  |
| VPS54         | 0.241778 | 4.54E-07    | 51542  |
| AC008686.1    | 0.241751 | 4.56E-07 NA |        |
| LDOC1L        | 0.241717 | 4.57E-07 NA |        |
| CCRN4L        | 0.2417   | 4.58E-07 NA |        |
| ZNF557        | 0.24169  | 4.59E-07    | 79230  |
| ZNF512        | 0.241671 | 4.60E-07    | 84450  |
| IWS1          | 0.24167  | 4.60E-07    | 55677  |
| LONP2         | 0.241651 | 4.61E-07    | 83752  |
| ATP6V1G1      | 0.241612 | 4.63E-07    | 9550   |
| ZMYND15       | 0.241596 | 4.64E-07    | 84225  |
| ZNF565        | 0.241587 | 4.64E-07    | 147929 |
| FAM104A       | 0.241536 | 4.67E-07    | 84923  |
| TRIM37        | 0.241483 | 4.69E-07    | 4591   |
| KIAA1919      | 0.241416 | 4.73E-07 NA |        |
| BTN3A1        | 0.241413 | 4.73E-07    | 11119  |
| TRPV5         | 0.241413 | 4.73E-07    | 56302  |
| FAM210B       | 0.241393 | 4.74E-07    | 116151 |
| PDC           | 0.241387 | 4.75E-07    | 5132   |
| GALNT18       | 0.241386 | 4.75E-07    | 374378 |
| PPP6R3        | 0.241372 | 4.75E-07    | 55291  |
| MAPKAP1       | 0.24135  | 4.77E-07    | 79109  |
| FOXJ3         | 0.241347 | 4.77E-07    | 22887  |
| PRTG          | 0.241341 | 4.77E-07    | 283659 |
| CAMLG         | 0.241339 | 4.77E-07    | 819    |
| FAM199X       | 0.241337 | 4.77E-07    | 139231 |
| YY1AP1        | 0.241332 | 4.77E-07    | 55249  |
| TAL1          | 0.241318 | 4.78E-07    | 6886   |
| ZNF354A       | 0.241314 | 4.78E-07    | 6940   |
| ANKRD65       | 0.24129  | 4.80E-07    | 441869 |
| ZNF778        | 0.241282 | 4.80E-07    | 197320 |
| ZNF140        | 0.241269 | 4.81E-07    | 7699   |
| ATL2          | 0.241254 | 4.82E-07    | 64225  |
| CCDC79        | 0.241247 | 4.82E-07 NA |        |
| SIGLEC15      | 0.241233 | 4.83E-07    | 284266 |
| POLN          | 0.241233 | 4.83E-07    | 353497 |
| MAP3K5        | 0.241224 | 4.83E-07    | 4217   |
| XPNPEP3       | 0.241215 | 4.84E-07    | 63929  |
| FAM102B       | 0.241186 | 4.85E-07    | 284611 |
| GALNT11       | 0.241148 | 4.87E-07    | 63917  |
| PUS10         | 0.241141 | 4.88E-07    | 150962 |
| CCDC65        | 0.241111 | 4.89E-07    | 85478  |
| STX4          | 0.241103 | 4.90E-07    | 6810   |
| SRBD1         | 0.241091 | 4.91E-07    | 55133  |
| EXT2          | 0.241065 | 4.92E-07    | 2132   |
| SNX13         | 0.240999 | 4.96E-07    | 23161  |
| DCP1A         | 0.240975 | 4.97E-07    | 55802  |
| POLR3A        | 0.240972 | 4.97E-07    | 11128  |
| FNBP4         | 0.240969 | 4.97E-07    | 23360  |
| ZNF792        | 0.24094  | 4.99E-07    | 126375 |
| ATXN7         | 0.240931 | 4.99E-07    | 6314   |
| METTL14       | 0.240927 | 5.00E-07    | 57721  |

|            |          |             |        |
|------------|----------|-------------|--------|
| CST6       | 0.240916 | 5.00E-07    | 1474   |
| RSPO1      | 0.240907 | 5.01E-07    | 284654 |
| AC069063.2 | 0.240869 | 5.03E-07 NA |        |
| FGD3       | 0.240868 | 5.03E-07    | 89846  |
| METTL10    | 0.240801 | 5.07E-07 NA |        |
| ZNF134     | 0.240717 | 5.12E-07    | 7693   |
| ZW10       | 0.240713 | 5.12E-07    | 9183   |
| RRAGA      | 0.240664 | 5.15E-07    | 10670  |
| ZC3H8      | 0.24054  | 5.22E-07    | 84524  |
| PLIN4      | 0.240532 | 5.22E-07    | 729359 |
| CACNB4     | 0.240526 | 5.23E-07    | 785    |
| LPIN1      | 0.240525 | 5.23E-07    | 23175  |
| LRRC55     | 0.240495 | 5.24E-07    | 219527 |
| TTC4       | 0.240491 | 5.25E-07    | 7268   |
| DENND3     | 0.240448 | 5.27E-07    | 22898  |
| ARPC1B     | 0.240447 | 5.27E-07    | 10095  |
| DDX42      | 0.240439 | 5.28E-07    | 11325  |
| PPWD1      | 0.240437 | 5.28E-07    | 23398  |
| RANBP6     | 0.240422 | 5.29E-07    | 26953  |
| MMS19      | 0.240401 | 5.30E-07    | 64210  |
| ABTB2      | 0.240396 | 5.30E-07    | 25841  |
| ZNF559     | 0.240332 | 5.34E-07    | 84527  |
| ARHGEF10   | 0.240289 | 5.37E-07    | 9639   |
| ZNF30      | 0.240264 | 5.38E-07    | 90075  |
| TBC1D16    | 0.240237 | 5.40E-07    | 125058 |
| SUSD6      | 0.240223 | 5.41E-07    | 9766   |
| DAXX       | 0.240187 | 5.43E-07    | 1616   |
| EIF4E      | 0.240155 | 5.45E-07    | 1977   |
| RBM15      | 0.240102 | 5.48E-07    | 64783  |
| ZNF253     | 0.240056 | 5.51E-07    | 56242  |
| LRIG2      | 0.24002  | 5.53E-07    | 9860   |
| REPS1      | 0.240017 | 5.53E-07    | 85021  |
| SLTM       | 0.239971 | 5.56E-07    | 79811  |
| HAUS3      | 0.239965 | 5.56E-07    | 79441  |
| ZNF493     | 0.239904 | 5.60E-07    | 284443 |
| ZNF317     | 0.239849 | 5.64E-07    | 57693  |
| NIP7       | 0.239839 | 5.64E-07    | 51388  |
| HP1BP3     | 0.239815 | 5.66E-07    | 50809  |
| TBKBP1     | 0.239776 | 5.68E-07    | 9755   |
| DIXDC1     | 0.23977  | 5.69E-07    | 85458  |
| RHEB       | 0.239767 | 5.69E-07    | 6009   |
| PNISR      | 0.239759 | 5.69E-07    | 25957  |
| FBXL3      | 0.239739 | 5.71E-07    | 26224  |
| ZNF670     | 0.239725 | 5.72E-07    | 93474  |
| ACTR10     | 0.239706 | 5.73E-07    | 55860  |
| HSP90AA1   | 0.239677 | 5.75E-07    | 3320   |
| MMP17      | 0.239672 | 5.75E-07    | 4326   |
| BROX       | 0.239662 | 5.76E-07    | 148362 |
| NEU3       | 0.239593 | 5.80E-07    | 10825  |
| MRFAP1L1   | 0.239567 | 5.82E-07    | 114932 |
| JRKL       | 0.239532 | 5.84E-07    | 8690   |
| SHROOM4    | 0.239513 | 5.85E-07    | 57477  |
| DNAH5      | 0.239459 | 5.89E-07    | 1767   |
| SRPR       | 0.239455 | 5.89E-07 NA |        |
| RCL1       | 0.239422 | 5.91E-07    | 10171  |
| FAM161A    | 0.239421 | 5.91E-07    | 84140  |
| NMT1       | 0.239378 | 5.94E-07    | 4836   |
| CLUU1OS    | 0.239352 | 5.96E-07 NA |        |
| C6orf106   | 0.239312 | 5.98E-07 NA |        |
| BCL9       | 0.239271 | 6.01E-07    | 607    |

|           |          |             |           |
|-----------|----------|-------------|-----------|
| RBP1      | 0.239241 | 6.03E-07    | 5947      |
| SLC22A17  | 0.239191 | 6.06E-07    | 51310     |
| MICU1     | 0.239157 | 6.09E-07    | 10367     |
| SHOX2     | 0.2391   | 6.13E-07    | 6474      |
| TRMT11    | 0.23907  | 6.15E-07    | 60487     |
| C19orf71  | 0.239064 | 6.15E-07    | 100128569 |
| INTS3     | 0.238989 | 6.20E-07    | 65123     |
| USP13     | 0.23897  | 6.22E-07    | 8975      |
| STAM2     | 0.238947 | 6.23E-07    | 10254     |
| UBA5      | 0.238938 | 6.24E-07    | 79876     |
| DTHD1     | 0.238908 | 6.26E-07    | 401124    |
| TMEM185B  | 0.238882 | 6.28E-07    | 79134     |
| DNTTIP2   | 0.238861 | 6.29E-07    | 30836     |
| EML4      | 0.238853 | 6.30E-07    | 27436     |
| ZNF788    | 0.238845 | 6.30E-07 NA |           |
| MAGED2    | 0.238837 | 6.31E-07    | 10916     |
| ASCL1     | 0.238807 | 6.33E-07    | 429       |
| TMCO3     | 0.238806 | 6.33E-07    | 55002     |
| BTN3A2    | 0.238791 | 6.34E-07    | 11118     |
| PDZRN3    | 0.238759 | 6.36E-07    | 23024     |
| ARFGEF1   | 0.238716 | 6.39E-07    | 10565     |
| TMEM57    | 0.238688 | 6.41E-07 NA |           |
| EVA1C     | 0.238666 | 6.43E-07    | 59271     |
| CUX1      | 0.238664 | 6.43E-07    | 1523      |
| POLR2B    | 0.238629 | 6.46E-07    | 5431      |
| BTN2A1    | 0.238625 | 6.46E-07    | 11120     |
| CD300LG   | 0.238618 | 6.46E-07    | 146894    |
| TMEM51    | 0.238596 | 6.48E-07    | 55092     |
| PLD2      | 0.238594 | 6.48E-07    | 5338      |
| COQ10A    | 0.238584 | 6.49E-07    | 93058     |
| NES       | 0.23858  | 6.49E-07    | 10763     |
| TNNI2     | 0.238573 | 6.50E-07    | 7136      |
| IKBKAP    | 0.23856  | 6.51E-07 NA |           |
| ZSWIM8    | 0.238537 | 6.52E-07    | 23053     |
| MAU2      | 0.238527 | 6.53E-07    | 23383     |
| RCN1      | 0.238526 | 6.53E-07    | 5954      |
| ARHGFEF28 | 0.238505 | 6.55E-07    | 64283     |
| MKRN2     | 0.238503 | 6.55E-07    | 23609     |
| CSTF3     | 0.23848  | 6.56E-07    | 1479      |
| UGGT1     | 0.238466 | 6.57E-07    | 56886     |
| TM2D2     | 0.238456 | 6.58E-07    | 83877     |
| KLHL22    | 0.238435 | 6.60E-07    | 84861     |
| CCDC148   | 0.238413 | 6.61E-07    | 130940    |
| MEOX1     | 0.238405 | 6.62E-07    | 4222      |
| USP8      | 0.238405 | 6.62E-07    | 9101      |
| FFAR3     | 0.23839  | 6.63E-07    | 2865      |
| IL2RB     | 0.238365 | 6.65E-07    | 3560      |
| AGPS      | 0.23835  | 6.66E-07    | 8540      |
| PPP1R13L  | 0.238348 | 6.66E-07    | 10848     |
| RAB2A     | 0.238341 | 6.66E-07    | 5862      |
| GABPB2    | 0.238323 | 6.68E-07    | 126626    |
| ZNF717    | 0.238305 | 6.69E-07    | 100131827 |
| C7orf49   | 0.238282 | 6.71E-07 NA |           |
| ZNF347    | 0.238279 | 6.71E-07    | 84671     |
| ZSCAN30   | 0.238268 | 6.72E-07    | 100101467 |
| NT5C1B    | 0.238256 | 6.73E-07    | 93034     |
| PLAG1     | 0.238218 | 6.76E-07    | 5324      |
| THUMPD3   | 0.238151 | 6.81E-07    | 25917     |
| BTBD1     | 0.23815  | 6.81E-07    | 53339     |
| SRSF1     | 0.23814  | 6.82E-07    | 6426      |

|          |          |             |           |
|----------|----------|-------------|-----------|
| ZNF329   | 0.238124 | 6.83E-07    | 79673     |
| SQLE     | 0.238108 | 6.84E-07    | 6713      |
| VAC14    | 0.238094 | 6.85E-07    | 55697     |
| NDUFAF7  | 0.238081 | 6.86E-07    | 55471     |
| MSANTD2  | 0.238061 | 6.87E-07    | 79684     |
| EPM2AIP1 | 0.238047 | 6.89E-07    | 9852      |
| ZNF587B  | 0.238005 | 6.92E-07    | 100293516 |
| DLG1     | 0.238004 | 6.92E-07    | 1739      |
| TRMT61B  | 0.237995 | 6.93E-07    | 55006     |
| ZNF181   | 0.237989 | 6.93E-07    | 339318    |
| RIN3     | 0.237984 | 6.93E-07    | 79890     |
| MYBL1    | 0.237957 | 6.95E-07    | 4603      |
| HELZ2    | 0.237933 | 6.97E-07    | 85441     |
| COPB1    | 0.237909 | 6.99E-07    | 1315      |
| SYCE1    | 0.237868 | 7.02E-07    | 93426     |
| HTR1F    | 0.237848 | 7.04E-07    | 3355      |
| SRP19    | 0.237845 | 7.04E-07    | 6728      |
| OR2D2    | 0.237841 | 7.04E-07    | 120776    |
| GPRIN3   | 0.237807 | 7.07E-07    | 285513    |
| DAG1     | 0.237781 | 7.09E-07    | 1605      |
| ZNF107   | 0.237771 | 7.10E-07    | 51427     |
| SMEK1    | 0.23773  | 7.13E-07 NA |           |
| CFAP57   | 0.237707 | 7.15E-07    | 149465    |
| LIN52    | 0.237703 | 7.15E-07    | 91750     |
| ERCC3    | 0.23769  | 7.16E-07    | 2071      |
| DZANK1   | 0.237656 | 7.19E-07    | 55184     |
| RCAN3    | 0.237605 | 7.23E-07    | 11123     |
| TAB2     | 0.237579 | 7.25E-07    | 23118     |
| TMED2    | 0.237473 | 7.34E-07    | 10959     |
| MSRB3    | 0.237464 | 7.34E-07    | 253827    |
| ZNF124   | 0.237464 | 7.34E-07    | 7678      |
| IKBKG    | 0.237385 | 7.41E-07    | 8517      |
| DEF8     | 0.237353 | 7.43E-07    | 54849     |
| USP28    | 0.237308 | 7.47E-07    | 57646     |
| MYNN     | 0.237279 | 7.50E-07    | 55892     |
| POU2F2   | 0.237256 | 7.51E-07    | 5452      |
| BOK      | 0.237252 | 7.52E-07    | 666       |
| GOLGA4   | 0.23725  | 7.52E-07    | 2803      |
| MAD1L1   | 0.237247 | 7.52E-07    | 8379      |
| GTF2H3   | 0.237197 | 7.56E-07    | 2967      |
| RAB1A    | 0.237162 | 7.59E-07    | 5861      |
| ABCC5    | 0.237156 | 7.60E-07    | 10057     |
| ZNF830   | 0.237139 | 7.61E-07    | 91603     |
| CCL21    | 0.237126 | 7.62E-07    | 6366      |
| NFX1     | 0.237107 | 7.64E-07    | 4799      |
| SLC25A51 | 0.237068 | 7.67E-07    | 92014     |
| WBP5     | 0.237018 | 7.71E-07 NA |           |
| NUP133   | 0.237011 | 7.72E-07    | 55746     |
| STIP1    | 0.236993 | 7.74E-07    | 10963     |
| ACTR1A   | 0.23697  | 7.75E-07    | 10121     |
| PRPF39   | 0.236965 | 7.76E-07    | 55015     |
| NOX5     | 0.236944 | 7.78E-07    | 79400     |
| RENBP    | 0.236925 | 7.79E-07    | 5973      |
| SPDYE3   | 0.236881 | 7.83E-07    | 441272    |
| ZNF519   | 0.236871 | 7.84E-07    | 162655    |
| ASXL1    | 0.236868 | 7.84E-07    | 171023    |
| VCP      | 0.236864 | 7.85E-07    | 7415      |
| ITPKC    | 0.236857 | 7.85E-07    | 80271     |
| EPT1     | 0.236823 | 7.88E-07 NA |           |
| ERI1     | 0.236811 | 7.89E-07    | 90459     |

|            |          |             |        |
|------------|----------|-------------|--------|
| FTSJ3      | 0.236778 | 7.92E-07    | 117246 |
| ZNF740     | 0.236774 | 7.92E-07    | 283337 |
| PKNOX1     | 0.236774 | 7.92E-07    | 5316   |
| DHX58      | 0.236724 | 7.97E-07    | 79132  |
| SNW1       | 0.236714 | 7.98E-07    | 22938  |
| ADNP       | 0.236697 | 7.99E-07    | 23394  |
| IGFBP6     | 0.236686 | 8.00E-07    | 3489   |
| RAB7A      | 0.23667  | 8.02E-07    | 7879   |
| TAGAP      | 0.236656 | 8.03E-07    | 117289 |
| MTPAP      | 0.236597 | 8.08E-07    | 55149  |
| TGFBRAP1   | 0.236549 | 8.12E-07    | 9392   |
| IFT20      | 0.236515 | 8.15E-07    | 90410  |
| AARS       | 0.236512 | 8.16E-07 NA |        |
| MAK16      | 0.236486 | 8.18E-07    | 84549  |
| ZNF782     | 0.236476 | 8.19E-07    | 158431 |
| STAG2      | 0.236405 | 8.25E-07    | 10735  |
| UBR4       | 0.236392 | 8.26E-07    | 23352  |
| PRRG3      | 0.236339 | 8.31E-07    | 79057  |
| SPATA6L    | 0.236328 | 8.32E-07    | 55064  |
| FBXL18     | 0.236319 | 8.33E-07    | 80028  |
| MAPK1IP1L  | 0.23617  | 8.47E-07    | 93487  |
| HPS4       | 0.23617  | 8.47E-07    | 89781  |
| KCNE5      | 0.23615  | 8.49E-07    | 23630  |
| TMEM64     | 0.236145 | 8.49E-07    | 169200 |
| TXLNB      | 0.236141 | 8.50E-07    | 167838 |
| HDAC9      | 0.236122 | 8.51E-07    | 9734   |
| KCNV2      | 0.236119 | 8.52E-07    | 169522 |
| KANSL3     | 0.236113 | 8.52E-07    | 55683  |
| TBX18      | 0.236094 | 8.54E-07    | 9096   |
| AC069063.1 | 0.236    | 8.63E-07 NA |        |
| ERVFRD-1   | 0.23598  | 8.65E-07    | 405754 |
| ZNF189     | 0.235975 | 8.65E-07    | 7743   |
| ZNF283     | 0.235955 | 8.67E-07    | 284349 |
| TNFAIP8L1  | 0.235948 | 8.68E-07    | 126282 |
| CRABP2     | 0.235926 | 8.70E-07    | 1382   |
| ANGPTL6    | 0.235911 | 8.71E-07    | 83854  |
| ZNF571     | 0.23591  | 8.71E-07    | 51276  |
| NRSN2      | 0.235893 | 8.73E-07    | 80023  |
| TINF2      | 0.235878 | 8.74E-07    | 26277  |
| C3orf49    | 0.235878 | 8.74E-07    | 132200 |
| SLC35A5    | 0.235858 | 8.76E-07    | 55032  |
| NOL10      | 0.23583  | 8.79E-07    | 79954  |
| DCAF13     | 0.235819 | 8.80E-07    | 25879  |
| MEX3A      | 0.235802 | 8.82E-07    | 92312  |
| DNAJC21    | 0.2358   | 8.82E-07    | 134218 |
| SMARCE1    | 0.235762 | 8.86E-07    | 6605   |
| ERV3-1     | 0.235742 | 8.87E-07    | 2086   |
| UBE2R2     | 0.235729 | 8.89E-07    | 54926  |
| MINA       | 0.235713 | 8.90E-07 NA |        |
| TRIM47     | 0.235691 | 8.92E-07    | 91107  |
| ZNF98      | 0.235683 | 8.93E-07    | 148198 |
| DDX47      | 0.235658 | 8.96E-07    | 51202  |
| ATP2A2     | 0.235641 | 8.97E-07    | 488    |
| DUSP22     | 0.235627 | 8.99E-07    | 56940  |
| STAC3      | 0.235607 | 9.01E-07    | 246329 |
| ZBTB39     | 0.235601 | 9.01E-07    | 9880   |
| SYCP3      | 0.235594 | 9.02E-07    | 50511  |
| RBM28      | 0.235534 | 9.08E-07    | 55131  |
| PDCD1      | 0.235508 | 9.11E-07    | 5133   |
| TOP3B      | 0.235487 | 9.13E-07    | 8940   |

|          |          |             |        |
|----------|----------|-------------|--------|
| PAK1IP1  | 0.235391 | 9.22E-07    | 55003  |
| TAS2R3   | 0.235381 | 9.23E-07    | 50831  |
| NSL1     | 0.235358 | 9.26E-07    | 25936  |
| EIF3C    | 0.235335 | 9.28E-07    | 8663   |
| KIAA0020 | 0.235315 | 9.30E-07 NA |        |
| TLK2     | 0.235263 | 9.35E-07    | 11011  |
| CRHR2    | 0.235228 | 9.39E-07    | 1395   |
| NUP98    | 0.23522  | 9.40E-07    | 4928   |
| CST2     | 0.235218 | 9.40E-07    | 1470   |
| RNPC3    | 0.235217 | 9.40E-07    | 55599  |
| ACTC1    | 0.235213 | 9.40E-07    | 70     |
| TSR1     | 0.235206 | 9.41E-07    | 55720  |
| EIF2AK4  | 0.235201 | 9.42E-07    | 440275 |
| USP33    | 0.235174 | 9.44E-07    | 23032  |
| OTUD7B   | 0.235118 | 9.50E-07    | 56957  |
| UBAP2    | 0.235067 | 9.55E-07    | 55833  |
| GANAB    | 0.235057 | 9.56E-07    | 23193  |
| GMEB1    | 0.235039 | 9.58E-07    | 10691  |
| STK19    | 0.235023 | 9.60E-07    | 8859   |
| ZNF812   | 0.235009 | 9.62E-07 NA |        |
| MNAT1    | 0.23495  | 9.68E-07    | 4331   |
| ATP11A   | 0.234867 | 9.77E-07    | 23250  |
| SPDYE1   | 0.234865 | 9.77E-07    | 285955 |
| MROH9    | 0.234861 | 9.77E-07    | 80133  |
| HNRNPH1  | 0.234789 | 9.85E-07    | 3187   |
| LRRC49   | 0.234789 | 9.85E-07    | 54839  |
| PPP1R3D  | 0.234736 | 9.91E-07    | 5509   |
| TXNDC2   | 0.234735 | 9.91E-07    | 84203  |
| SGOL2    | 0.234722 | 9.92E-07 NA |        |
| NDN      | 0.234697 | 9.95E-07    | 4692   |
| WDR3     | 0.234696 | 9.95E-07    | 10885  |
| ROR1     | 0.234694 | 9.95E-07    | 4919   |
| MRPL19   | 0.234686 | 9.96E-07    | 9801   |
| SH2D4B   | 0.234579 | 1.01E-06    | 387694 |
| ESF1     | 0.234565 | 1.01E-06    | 51575  |
| ZNF491   | 0.234562 | 1.01E-06    | 126069 |
| FUT8     | 0.234553 | 1.01E-06    | 2530   |
| AP3M1    | 0.234544 | 1.01E-06    | 26985  |
| AK5      | 0.234539 | 1.01E-06    | 26289  |
| SLC30A5  | 0.234519 | 1.01E-06    | 64924  |
| C10orf32 | 0.234505 | 1.02E-06 NA |        |
| LRRC8B   | 0.234483 | 1.02E-06    | 23507  |
| AGPAT6   | 0.234463 | 1.02E-06 NA |        |
| MTO1     | 0.234455 | 1.02E-06    | 25821  |
| RNF8     | 0.234432 | 1.02E-06    | 9025   |
| ZRANB2   | 0.234427 | 1.02E-06    | 9406   |
| TOP3A    | 0.234409 | 1.03E-06    | 7156   |
| HDC      | 0.234373 | 1.03E-06    | 3067   |
| ADORA1   | 0.234351 | 1.03E-06    | 134    |
| ACSM5    | 0.2343   | 1.04E-06    | 54988  |
| ANKRD11  | 0.23427  | 1.04E-06    | 29123  |
| C1orf116 | 0.234243 | 1.05E-06    | 79098  |
| KIAA1109 | 0.234216 | 1.05E-06    | 84162  |
| SPATS2L  | 0.234206 | 1.05E-06    | 26010  |
| GALNT2   | 0.234178 | 1.05E-06    | 2590   |
| NFKB1    | 0.234159 | 1.05E-06    | 4790   |
| SCN4A    | 0.234159 | 1.05E-06    | 6329   |
| FAM185A  | 0.234141 | 1.06E-06    | 222234 |
| ANLN     | 0.234131 | 1.06E-06    | 54443  |
| ZNF649   | 0.234127 | 1.06E-06    | 65251  |

|            |          |             |        |
|------------|----------|-------------|--------|
| DNAJC8     | 0.2341   | 1.06E-06    | 22826  |
| TBC1D9     | 0.234095 | 1.06E-06    | 23158  |
| EGFL7      | 0.234082 | 1.06E-06    | 51162  |
| CCDC186    | 0.233961 | 1.08E-06    | 55088  |
| CHD7       | 0.233955 | 1.08E-06    | 55636  |
| OMG        | 0.233905 | 1.08E-06    | 4974   |
| ZNF182     | 0.233863 | 1.09E-06    | 7569   |
| TVP23A     | 0.233859 | 1.09E-06    | 780776 |
| RNF41      | 0.233823 | 1.09E-06    | 10193  |
| PAFAH1B1   | 0.233813 | 1.10E-06    | 5048   |
| CYP20A1    | 0.233781 | 1.10E-06    | 57404  |
| FAM200A    | 0.233781 | 1.10E-06    | 221786 |
| HSPA12A    | 0.233735 | 1.10E-06    | 259217 |
| ZFAND4     | 0.233734 | 1.10E-06    | 93550  |
| HSPA8      | 0.233709 | 1.11E-06    | 3312   |
| GAB2       | 0.233709 | 1.11E-06    | 9846   |
| GRIK1      | 0.233665 | 1.11E-06    | 2897   |
| UBA2       | 0.233656 | 1.11E-06    | 10054  |
| CSNK2A1    | 0.233656 | 1.11E-06    | 1457   |
| TPST2      | 0.233619 | 1.12E-06    | 8459   |
| TLK1       | 0.233612 | 1.12E-06    | 9874   |
| TBC1D24    | 0.233589 | 1.12E-06    | 57465  |
| LGMN       | 0.233589 | 1.12E-06    | 5641   |
| DNTTIP1    | 0.233584 | 1.12E-06    | 116092 |
| ANGPTL3    | 0.233572 | 1.12E-06    | 27329  |
| ZBTB26     | 0.233545 | 1.13E-06    | 57684  |
| PTPRA      | 0.233543 | 1.13E-06    | 5786   |
| ESYT1      | 0.233515 | 1.13E-06    | 23344  |
| ERO1L      | 0.233513 | 1.13E-06 NA |        |
| ZKSCAN7    | 0.233496 | 1.13E-06    | 55888  |
| YY1        | 0.233476 | 1.14E-06    | 7528   |
| TM9SF1     | 0.233456 | 1.14E-06    | 10548  |
| ZNF174     | 0.233443 | 1.14E-06    | 7727   |
| BRPF1      | 0.233421 | 1.14E-06    | 7862   |
| LANCL1     | 0.233417 | 1.14E-06    | 10314  |
| SERBP1     | 0.233382 | 1.15E-06    | 26135  |
| NUB1       | 0.233372 | 1.15E-06    | 51667  |
| ZMIZ1      | 0.233335 | 1.15E-06    | 57178  |
| WDR11      | 0.233334 | 1.15E-06    | 55717  |
| SAMD15     | 0.233285 | 1.16E-06    | 161394 |
| C11orf95   | 0.233266 | 1.16E-06    | 65998  |
| HLA-DMB    | 0.233258 | 1.16E-06    | 3109   |
| ZNF528     | 0.23325  | 1.16E-06    | 84436  |
| AL023806.1 | 0.23325  | 1.16E-06 NA |        |
| MSH6       | 0.233229 | 1.17E-06    | 2956   |
| FKTN       | 0.233219 | 1.17E-06    | 2218   |
| ATP6V1H    | 0.233199 | 1.17E-06    | 51606  |
| SPG21      | 0.233177 | 1.17E-06    | 51324  |
| ZNF549     | 0.233177 | 1.17E-06    | 256051 |
| AL158801.1 | 0.233164 | 1.18E-06 NA |        |
| DNAJA2     | 0.233152 | 1.18E-06    | 10294  |
| UPF3B      | 0.233152 | 1.18E-06    | 65109  |
| ZNF845     | 0.233128 | 1.18E-06    | 91664  |
| SMC5       | 0.233113 | 1.18E-06    | 23137  |
| ATG3       | 0.23309  | 1.18E-06    | 64422  |
| TMEM87A    | 0.233027 | 1.19E-06    | 25963  |
| ZNF19      | 0.233026 | 1.19E-06    | 7567   |
| C12orf76   | 0.233018 | 1.19E-06    | 400073 |
| ORC3       | 0.233014 | 1.19E-06    | 23595  |
| IFI6       | 0.232979 | 1.20E-06    | 2537   |

|          |          |             |           |
|----------|----------|-------------|-----------|
| LTV1     | 0.232954 | 1.20E-06    | 84946     |
| TSNAX    | 0.232946 | 1.20E-06    | 7257      |
| NRAS     | 0.232944 | 1.20E-06    | 4893      |
| ASPM     | 0.232932 | 1.21E-06    | 259266    |
| UBE3C    | 0.232904 | 1.21E-06    | 9690      |
| IRF5     | 0.232885 | 1.21E-06    | 3663      |
| RCN2     | 0.232857 | 1.21E-06    | 5955      |
| SIN3A    | 0.232692 | 1.24E-06    | 25942     |
| B3GAT2   | 0.232639 | 1.24E-06    | 135152    |
| KRT7     | 0.232631 | 1.24E-06    | 3855      |
| UBE3A    | 0.232612 | 1.25E-06    | 7337      |
| TEX2     | 0.232595 | 1.25E-06    | 55852     |
| UCHL5    | 0.232558 | 1.25E-06    | 51377     |
| SZT2     | 0.232528 | 1.26E-06    | 23334     |
| PPP1R8   | 0.232516 | 1.26E-06    | 5511      |
| ERRFI1   | 0.232423 | 1.27E-06    | 54206     |
| UBP1     | 0.23241  | 1.27E-06    | 7342      |
| LIG4     | 0.232408 | 1.28E-06    | 3981      |
| EIF4G3   | 0.232387 | 1.28E-06    | 8672      |
| MTMR12   | 0.232381 | 1.28E-06    | 54545     |
| RRAGC    | 0.232327 | 1.29E-06    | 64121     |
| TMED10   | 0.232289 | 1.29E-06    | 10972     |
| TRIM16   | 0.23226  | 1.30E-06    | 10626     |
| EMC1     | 0.232237 | 1.30E-06    | 23065     |
| ZNF24    | 0.232233 | 1.30E-06    | 7572      |
| ISG20L2  | 0.232227 | 1.30E-06    | 81875     |
| TIAM1    | 0.232166 | 1.31E-06    | 7074      |
| SUDS3    | 0.232126 | 1.31E-06    | 64426     |
| ALG9     | 0.232118 | 1.32E-06    | 79796     |
| TIAL1    | 0.232117 | 1.32E-06    | 7073      |
| AP1G1    | 0.232098 | 1.32E-06    | 164       |
| G3BP2    | 0.232091 | 1.32E-06    | 9908      |
| TMEM248  | 0.232084 | 1.32E-06    | 55069     |
| TMEM189  | 0.232066 | 1.32E-06 NA |           |
| USP14    | 0.23206  | 1.32E-06    | 9097      |
| NEK4     | 0.232058 | 1.32E-06    | 6787      |
| ARHGEF33 | 0.232018 | 1.33E-06    | 100271715 |
| DHX15    | 0.232017 | 1.33E-06    | 1665      |
| TEDDM1   | 0.23198  | 1.34E-06    | 127670    |
| TRAPPC2B | 0.231969 | 1.34E-06    | 10597     |
| TMEM150A | 0.231908 | 1.35E-06    | 129303    |
| RAET1L   | 0.231901 | 1.35E-06    | 154064    |
| ANKRD32  | 0.231886 | 1.35E-06 NA |           |
| DDB1     | 0.231828 | 1.36E-06    | 1642      |
| AVL9     | 0.231823 | 1.36E-06    | 23080     |
| RPGR     | 0.231786 | 1.36E-06    | 6103      |
| GANC     | 0.23172  | 1.37E-06    | 2595      |
| SPEN     | 0.231719 | 1.37E-06    | 23013     |
| SLCO1A2  | 0.231718 | 1.37E-06    | 6579      |
| PPM1K    | 0.2317   | 1.38E-06    | 152926    |
| TSN      | 0.231661 | 1.38E-06    | 7247      |
| FBXO15   | 0.231574 | 1.39E-06    | 201456    |
| ZNF526   | 0.231523 | 1.40E-06    | 116115    |
| PDZD8    | 0.231517 | 1.40E-06    | 118987    |
| PRKAA1   | 0.231502 | 1.41E-06    | 5562      |
| TCF20    | 0.231446 | 1.41E-06    | 6942      |
| IL12RB2  | 0.231445 | 1.41E-06    | 3595      |
| ZNF627   | 0.231402 | 1.42E-06    | 199692    |
| SCYL2    | 0.231295 | 1.44E-06    | 55681     |
| LYG2     | 0.231277 | 1.44E-06    | 254773    |



|              |          |             |           |
|--------------|----------|-------------|-----------|
| BTBD8        | 0.231249 | 1.44E-06    | 284697    |
| DDX59        | 0.231216 | 1.45E-06    | 83479     |
| TUBGCP3      | 0.231193 | 1.45E-06    | 10426     |
| NLRC3        | 0.231127 | 1.46E-06    | 197358    |
| DDX46        | 0.231121 | 1.46E-06    | 9879      |
| TAS2R4       | 0.231073 | 1.47E-06    | 50832     |
| GDI1         | 0.231048 | 1.48E-06    | 2664      |
| PCYT1A       | 0.231044 | 1.48E-06    | 5130      |
| ARHGAP42     | 0.231014 | 1.48E-06    | 143872    |
| KPNB1        | 0.230999 | 1.48E-06    | 3837      |
| RAD21        | 0.23099  | 1.49E-06    | 5885      |
| RAB40A       | 0.23098  | 1.49E-06    | 142684    |
| UPP2         | 0.230923 | 1.50E-06    | 151531    |
| SIRT2        | 0.230884 | 1.50E-06    | 22933     |
| SNX2         | 0.23088  | 1.50E-06    | 6643      |
| CPN2         | 0.23087  | 1.50E-06    | 1370      |
| BCL11B       | 0.230866 | 1.51E-06    | 64919     |
| PRKRIR       | 0.230862 | 1.51E-06 NA |           |
| SCGB3A2      | 0.230847 | 1.51E-06    | 117156    |
| FAM114A1     | 0.230843 | 1.51E-06    | 92689     |
| CAMKMT       | 0.230842 | 1.51E-06    | 79823     |
| B4GALT1      | 0.230802 | 1.52E-06    | 2683      |
| CXorf58      | 0.230798 | 1.52E-06    | 254158    |
| PTPN13       | 0.230733 | 1.53E-06    | 5783      |
| CCDC121      | 0.230717 | 1.53E-06    | 79635     |
| GALNT1       | 0.230706 | 1.53E-06    | 2589      |
| ZNF33B       | 0.230688 | 1.53E-06    | 7582      |
| PRPF4        | 0.230686 | 1.53E-06    | 9128      |
| ITPKB        | 0.230638 | 1.54E-06    | 3707      |
| TVP23C-CDRT4 | 0.23061  | 1.55E-06    | 100533496 |
| ZNF41        | 0.230592 | 1.55E-06    | 7592      |
| BBS1         | 0.230564 | 1.55E-06    | 582       |
| ETV3         | 0.230526 | 1.56E-06    | 2117      |
| VPS37C       | 0.230505 | 1.56E-06    | 55048     |
| PCM1         | 0.230483 | 1.57E-06    | 5108      |
| UBTF         | 0.23048  | 1.57E-06    | 7343      |
| ARHGAP18     | 0.230423 | 1.58E-06    | 93663     |
| IRAK1BP1     | 0.230408 | 1.58E-06    | 134728    |
| ITGA10       | 0.230403 | 1.58E-06    | 8515      |
| ANXA2R       | 0.230379 | 1.59E-06    | 389289    |
| XRN2         | 0.230356 | 1.59E-06    | 22803     |
| GLIPR1       | 0.23035  | 1.59E-06    | 11010     |
| ABCC1        | 0.23034  | 1.59E-06    | 4363      |
| FAIM         | 0.230337 | 1.59E-06    | 55179     |
| ZMYM6NB      | 0.23032  | 1.60E-06 NA |           |
| DYNC2LI1     | 0.230311 | 1.60E-06    | 51626     |
| DNM1L        | 0.230282 | 1.60E-06    | 10059     |
| CDON         | 0.230275 | 1.60E-06    | 50937     |
| TFAP2A       | 0.230256 | 1.61E-06    | 7020      |
| HNRNPDL      | 0.230236 | 1.61E-06    | 9987      |
| SPTLC1       | 0.230229 | 1.61E-06    | 10558     |
| ATP6V1E1     | 0.230202 | 1.62E-06    | 529       |
| SLX4         | 0.230187 | 1.62E-06    | 84464     |
| TAS2R10      | 0.230169 | 1.62E-06    | 50839     |
| ZNF354B      | 0.230105 | 1.63E-06    | 117608    |
| LTA          | 0.230078 | 1.64E-06    | 4049      |
| SMIM18       | 0.230064 | 1.64E-06    | 100507341 |
| ZFP82        | 0.230044 | 1.64E-06    | 284406    |
| OCSTAMP      | 0.230033 | 1.65E-06    | 128506    |
| VPS37A       | 0.230022 | 1.65E-06    | 137492    |

|          |          |             |        |
|----------|----------|-------------|--------|
| GORASP2  | 0.230013 | 1.65E-06    | 26003  |
| NCOA5    | 0.229962 | 1.66E-06    | 57727  |
| PRMT3    | 0.22995  | 1.66E-06    | 10196  |
| PDE6G    | 0.229947 | 1.66E-06    | 5148   |
| DDX60L   | 0.22994  | 1.66E-06    | 91351  |
| GPN1     | 0.229928 | 1.66E-06    | 11321  |
| DHX33    | 0.229913 | 1.67E-06    | 56919  |
| AMMECR1L | 0.229896 | 1.67E-06    | 83607  |
| SLC10A7  | 0.229884 | 1.67E-06    | 84068  |
| ALS2CR11 | 0.229869 | 1.67E-06 NA |        |
| CPE      | 0.229856 | 1.68E-06    | 1363   |
| CYB5R4   | 0.229847 | 1.68E-06    | 51167  |
| SUPT5H   | 0.229838 | 1.68E-06    | 6829   |
| TNPO3    | 0.229833 | 1.68E-06    | 23534  |
| HLTF     | 0.229831 | 1.68E-06    | 6596   |
| PITRM1   | 0.229773 | 1.69E-06    | 10531  |
| ZSCAN9   | 0.229751 | 1.70E-06    | 7746   |
| TSPAN5   | 0.229714 | 1.70E-06    | 10098  |
| BAG2     | 0.229653 | 1.71E-06    | 9532   |
| FBXO7    | 0.229589 | 1.73E-06    | 25793  |
| CNPY3    | 0.229589 | 1.73E-06    | 10695  |
| CCDC122  | 0.229559 | 1.73E-06    | 160857 |
| AKAP10   | 0.229514 | 1.74E-06    | 11216  |
| L1CAM    | 0.229503 | 1.74E-06    | 3897   |
| SBNO2    | 0.229399 | 1.76E-06    | 22904  |
| SLC35F5  | 0.229396 | 1.76E-06    | 80255  |
| CABIN1   | 0.22936  | 1.77E-06    | 23523  |
| RBM39    | 0.229295 | 1.78E-06    | 9584   |
| POLR1B   | 0.229265 | 1.79E-06    | 84172  |
| TAF1D    | 0.229264 | 1.79E-06    | 79101  |
| TGFB1I1  | 0.229245 | 1.79E-06    | 7041   |
| PSTPIP2  | 0.229241 | 1.79E-06    | 9050   |
| AP2M1    | 0.229212 | 1.80E-06    | 1173   |
| DRAP1    | 0.22919  | 1.80E-06    | 10589  |
| UBE2E1   | 0.229187 | 1.80E-06    | 7324   |
| VHL      | 0.229151 | 1.81E-06    | 7428   |
| HSF2     | 0.229147 | 1.81E-06    | 3298   |
| SF3B2    | 0.229139 | 1.81E-06    | 10992  |
| ZNF646   | 0.229097 | 1.82E-06    | 9726   |
| VPS45    | 0.229084 | 1.82E-06    | 11311  |
| DNMT3A   | 0.229073 | 1.82E-06    | 1788   |
| CRNKL1   | 0.229061 | 1.82E-06    | 51340  |
| PTH1R    | 0.229046 | 1.83E-06    | 5745   |
| C5orf22  | 0.229031 | 1.83E-06    | 55322  |
| ARHGAP9  | 0.229008 | 1.84E-06    | 64333  |
| SH3BP4   | 0.228983 | 1.84E-06    | 23677  |
| TCEA2    | 0.228967 | 1.84E-06    | 6919   |
| TUBG2    | 0.22893  | 1.85E-06    | 27175  |
| UNC45B   | 0.228913 | 1.85E-06    | 146862 |
| FNBP1L   | 0.228882 | 1.86E-06    | 54874  |
| USP12    | 0.228875 | 1.86E-06    | 219333 |
| STARD3NL | 0.22884  | 1.87E-06    | 83930  |
| ZNF443   | 0.228816 | 1.87E-06    | 10224  |
| ZDHHC21  | 0.228784 | 1.88E-06    | 340481 |
| MEIS2    | 0.228776 | 1.88E-06    | 4212   |
| ZNF551   | 0.228767 | 1.88E-06    | 90233  |
| SELM     | 0.228765 | 1.88E-06 NA |        |
| ZNF765   | 0.228762 | 1.88E-06    | 91661  |
| LIG3     | 0.228746 | 1.89E-06    | 3980   |
| COPB2    | 0.228721 | 1.89E-06    | 9276   |

|              |          |             |           |
|--------------|----------|-------------|-----------|
| KLHL29       | 0.228709 | 1.89E-06    | 114818    |
| CD1A         | 0.228701 | 1.90E-06    | 909       |
| ZNF490       | 0.228677 | 1.90E-06    | 57474     |
| BUB3         | 0.228648 | 1.91E-06    | 9184      |
| PSMC2        | 0.228608 | 1.91E-06    | 5701      |
| SLC9A7       | 0.228507 | 1.94E-06    | 84679     |
| RERG         | 0.228495 | 1.94E-06    | 85004     |
| LMAN1        | 0.228458 | 1.95E-06    | 3998      |
| ZFAND1       | 0.228452 | 1.95E-06    | 79752     |
| TBRG1        | 0.228427 | 1.95E-06    | 84897     |
| FAM65C       | 0.228412 | 1.96E-06 NA |           |
| RBM33        | 0.22839  | 1.96E-06    | 155435    |
| LRRC7        | 0.228374 | 1.96E-06    | 57554     |
| CERS6        | 0.228341 | 1.97E-06    | 253782    |
| CALR         | 0.228307 | 1.98E-06    | 811       |
| RNF170       | 0.228301 | 1.98E-06    | 81790     |
| PKM          | 0.228287 | 1.98E-06    | 5315      |
| TVP23B       | 0.228284 | 1.98E-06    | 51030     |
| PDE12        | 0.22827  | 1.98E-06    | 201626    |
| ZKSCAN2      | 0.228254 | 1.99E-06    | 342357    |
| GORAB        | 0.22823  | 1.99E-06    | 92344     |
| CCZ1B        | 0.228225 | 1.99E-06    | 221960    |
| MARCKS       | 0.22822  | 2.00E-06    | 4082      |
| MFSD8        | 0.228219 | 2.00E-06    | 256471    |
| POM121       | 0.228218 | 2.00E-06    | 9883      |
| GPR111       | 0.228209 | 2.00E-06 NA |           |
| UBQLN4       | 0.228187 | 2.00E-06    | 56893     |
| DISP1        | 0.228182 | 2.00E-06    | 84976     |
| AKAP8L       | 0.228168 | 2.01E-06    | 26993     |
| COG6         | 0.228156 | 2.01E-06    | 57511     |
| H6PD         | 0.2281   | 2.02E-06    | 9563      |
| ARL17B       | 0.228093 | 2.02E-06    | 100506084 |
| ANXA7        | 0.228071 | 2.03E-06    | 310       |
| SH3TC1       | 0.228044 | 2.03E-06    | 54436     |
| NRIP1        | 0.227975 | 2.05E-06    | 8204      |
| CCNI         | 0.227963 | 2.05E-06    | 10983     |
| HLCS         | 0.227939 | 2.06E-06    | 3141      |
| CDK5R1       | 0.22791  | 2.06E-06    | 8851      |
| TACR1        | 0.227902 | 2.06E-06    | 6869      |
| HELLS        | 0.227899 | 2.06E-06    | 3070      |
| MED12        | 0.227896 | 2.06E-06    | 9968      |
| BBS7         | 0.227865 | 2.07E-06    | 55212     |
| CDH20        | 0.227842 | 2.08E-06    | 28316     |
| VPS39        | 0.227812 | 2.08E-06    | 23339     |
| FHOD1        | 0.22779  | 2.09E-06    | 29109     |
| RP11-849H4.2 | 0.227764 | 2.09E-06 NA |           |
| YWHAQ        | 0.227756 | 2.10E-06    | 10971     |
| NOM1         | 0.227748 | 2.10E-06    | 64434     |
| CYP26C1      | 0.227734 | 2.10E-06    | 340665    |
| CEP104       | 0.22769  | 2.11E-06    | 9731      |
| PROS1        | 0.22768  | 2.11E-06    | 5627      |
| ATP6V0E1     | 0.227644 | 2.12E-06    | 8992      |
| ZNF34        | 0.227622 | 2.13E-06    | 80778     |
| GNAL         | 0.227596 | 2.13E-06    | 2774      |
| CEACAM6      | 0.227529 | 2.15E-06    | 4680      |
| LONRF1       | 0.227471 | 2.16E-06    | 91694     |
| UNC50        | 0.22747  | 2.16E-06    | 25972     |
| XPO5         | 0.227439 | 2.17E-06    | 57510     |
| PRDM15       | 0.227434 | 2.17E-06    | 63977     |
| ZNF75A       | 0.227394 | 2.18E-06    | 7627      |

|                |          |             |           |
|----------------|----------|-------------|-----------|
| TAF4B          | 0.227363 | 2.18E-06    | 6875      |
| UBE2F          | 0.227354 | 2.19E-06    | 140739    |
| SRRM1          | 0.227354 | 2.19E-06    | 10250     |
| TAOK3          | 0.227328 | 2.19E-06    | 51347     |
| POM121C        | 0.227324 | 2.19E-06    | 100101267 |
| WDR70          | 0.227318 | 2.19E-06    | 55100     |
| ING3           | 0.227294 | 2.20E-06    | 54556     |
| C12orf43       | 0.227284 | 2.20E-06    | 64897     |
| POLR3D         | 0.227267 | 2.21E-06    | 661       |
| NPHP4          | 0.227243 | 2.21E-06    | 261734    |
| ZMYM3          | 0.227225 | 2.22E-06    | 9203      |
| CPSF7          | 0.227213 | 2.22E-06    | 79869     |
| CLDN16         | 0.227199 | 2.22E-06    | 10686     |
| SMU1           | 0.227098 | 2.25E-06    | 55234     |
| HK1            | 0.227074 | 2.25E-06    | 3098      |
| POLR1A         | 0.227073 | 2.25E-06    | 25885     |
| EBAG9          | 0.227061 | 2.26E-06    | 9166      |
| TTC37          | 0.226989 | 2.27E-06    | 9652      |
| DDIT4          | 0.226985 | 2.27E-06    | 54541     |
| DCTD           | 0.226978 | 2.27E-06    | 1635      |
| TRIT1          | 0.226969 | 2.28E-06    | 54802     |
| LA16c-431H6.6  | 0.226929 | 2.29E-06 NA |           |
| BNIPL          | 0.226905 | 2.29E-06    | 149428    |
| RGPD3          | 0.226886 | 2.30E-06    | 653489    |
| CADM4          | 0.226862 | 2.30E-06    | 199731    |
| CCDC18         | 0.226819 | 2.31E-06    | 343099    |
| KDM1B          | 0.226775 | 2.32E-06    | 221656    |
| RP11-574K11.31 | 0.22674  | 2.33E-06 NA |           |
| RSBN1          | 0.226722 | 2.34E-06    | 54665     |
| RARG           | 0.226713 | 2.34E-06    | 5916      |
| EXOSC3         | 0.22671  | 2.34E-06    | 51010     |
| GPR75          | 0.226698 | 2.34E-06    | 10936     |
| COQ10B         | 0.226669 | 2.35E-06    | 80219     |
| ZBP1           | 0.22666  | 2.35E-06    | 81030     |
| SRPX2          | 0.226596 | 2.37E-06    | 27286     |
| CCDC15         | 0.226588 | 2.37E-06    | 80071     |
| AGTRAP         | 0.226578 | 2.37E-06    | 57085     |
| TCP11L2        | 0.226576 | 2.37E-06    | 255394    |
| TRA2A          | 0.226573 | 2.37E-06    | 29896     |
| TADA1          | 0.226557 | 2.38E-06    | 117143    |
| AC105009.1     | 0.226518 | 2.39E-06 NA |           |
| DGKE           | 0.226516 | 2.39E-06    | 8526      |
| CAV1           | 0.226488 | 2.40E-06    | 857       |
| ITGB3          | 0.226474 | 2.40E-06    | 3690      |
| CCDC93         | 0.226426 | 2.41E-06    | 54520     |
| CHD1           | 0.226422 | 2.41E-06    | 1105      |
| CBX6           | 0.226414 | 2.41E-06    | 23466     |
| KLHL6          | 0.226369 | 2.43E-06    | 89857     |
| TRA2B          | 0.22635  | 2.43E-06    | 6434      |
| CEP78          | 0.226339 | 2.43E-06    | 84131     |
| ADAM29         | 0.226287 | 2.45E-06    | 11086     |
| SCARA3         | 0.226245 | 2.46E-06    | 51435     |
| SLC7A6         | 0.226244 | 2.46E-06    | 9057      |
| PTPRU          | 0.226215 | 2.46E-06    | 10076     |
| CTAGE9         | 0.226198 | 2.47E-06    | 643854    |
| YTHDC2         | 0.226166 | 2.48E-06    | 64848     |
| GINM1          | 0.226158 | 2.48E-06    | 116254    |
| LRRC27         | 0.226142 | 2.48E-06    | 80313     |
| SEMA3C         | 0.226131 | 2.49E-06    | 10512     |
| CTCF           | 0.226101 | 2.49E-06    | 10664     |

|              |          |             |        |
|--------------|----------|-------------|--------|
| PCMTD2       | 0.22609  | 2.50E-06    | 55251  |
| SNCG         | 0.226075 | 2.50E-06    | 6623   |
| ADSS         | 0.226067 | 2.50E-06 NA |        |
| CDCP2        | 0.22604  | 2.51E-06    | 200008 |
| CD180        | 0.226033 | 2.51E-06    | 4064   |
| TMEM217      | 0.226003 | 2.52E-06    | 221468 |
| CUEDC1       | 0.226002 | 2.52E-06    | 404093 |
| MYO6         | 0.225986 | 2.52E-06    | 4646   |
| ZBTB49       | 0.225962 | 2.53E-06    | 166793 |
| GLIPR1L2     | 0.225947 | 2.54E-06    | 144321 |
| VPS13A       | 0.225912 | 2.54E-06    | 23230  |
| ZNF45        | 0.225908 | 2.55E-06    | 7596   |
| ZCCHC8       | 0.22585  | 2.56E-06    | 55596  |
| RWDD3        | 0.225838 | 2.56E-06    | 25950  |
| URB1         | 0.225816 | 2.57E-06    | 9875   |
| CCDC171      | 0.225801 | 2.57E-06    | 203238 |
| GFM1         | 0.225784 | 2.58E-06    | 85476  |
| PCDHB5       | 0.225774 | 2.58E-06    | 26167  |
| CTR9         | 0.22577  | 2.58E-06    | 9646   |
| POLR2K       | 0.225761 | 2.59E-06    | 5440   |
| PPP2R5C      | 0.225752 | 2.59E-06    | 5527   |
| GPR171       | 0.225747 | 2.59E-06    | 29909  |
| GGNBP2       | 0.225746 | 2.59E-06    | 79893  |
| NUDCD3       | 0.225719 | 2.60E-06    | 23386  |
| ZNF561       | 0.225688 | 2.60E-06    | 93134  |
| TDRD9        | 0.225655 | 2.61E-06    | 122402 |
| JKAMP        | 0.225579 | 2.63E-06    | 51528  |
| ERF          | 0.225557 | 2.64E-06    | 2077   |
| ZNF500       | 0.225518 | 2.65E-06    | 26048  |
| MTRR         | 0.22548  | 2.66E-06    | 4552   |
| MTBP         | 0.22548  | 2.66E-06    | 27085  |
| RHEBL1       | 0.225478 | 2.66E-06    | 121268 |
| FAM120B      | 0.225476 | 2.66E-06    | 84498  |
| TTC17        | 0.225457 | 2.67E-06    | 55761  |
| AC024060.1   | 0.225439 | 2.67E-06 NA |        |
| TTC21B       | 0.225438 | 2.67E-06    | 79809  |
| SLC25A18     | 0.225431 | 2.68E-06    | 83733  |
| TGS1         | 0.225416 | 2.68E-06    | 96764  |
| EXOC6        | 0.225303 | 2.71E-06    | 54536  |
| GPR89A       | 0.22529  | 2.72E-06    | 653519 |
| C12orf29     | 0.225268 | 2.72E-06    | 91298  |
| TRAFD1       | 0.225264 | 2.72E-06    | 10906  |
| ANKHD1       | 0.225247 | 2.73E-06    | 54882  |
| APC          | 0.225245 | 2.73E-06    | 324    |
| RBM19        | 0.225234 | 2.73E-06    | 9904   |
| RMDN1        | 0.22522  | 2.74E-06    | 51115  |
| EDIL3        | 0.225217 | 2.74E-06    | 10085  |
| RP3-461F17.3 | 0.225157 | 2.75E-06 NA |        |
| PIK3R3       | 0.225147 | 2.76E-06    | 8503   |
| KLHL15       | 0.225136 | 2.76E-06    | 80311  |
| IFITM3       | 0.225126 | 2.76E-06    | 10410  |
| C1orf52      | 0.225103 | 2.77E-06    | 148423 |
| SLC13A4      | 0.225083 | 2.77E-06    | 26266  |
| ANTXR2       | 0.225072 | 2.78E-06    | 118429 |
| LRRC74A      | 0.225053 | 2.78E-06    | 145497 |
| LAMA3        | 0.225048 | 2.78E-06    | 3909   |
| GPATCH4      | 0.225015 | 2.79E-06    | 54865  |
| HNRNPUL1     | 0.225002 | 2.80E-06    | 11100  |
| FAM150A      | 0.224919 | 2.82E-06 NA |        |
| GMPS         | 0.224903 | 2.83E-06    | 8833   |

|               |          |             |        |
|---------------|----------|-------------|--------|
| CBWD3         | 0.224894 | 2.83E-06    | 445571 |
| SELENBP1      | -0.22487 | 2.84E-06    | 8991   |
| PGLYRP3       | 0.224854 | 2.84E-06    | 114771 |
| TWF2          | 0.224843 | 2.85E-06    | 11344  |
| GNL2          | 0.224825 | 2.85E-06    | 29889  |
| ZNF343        | 0.224818 | 2.85E-06    | 79175  |
| RBBP4         | 0.224815 | 2.85E-06    | 5928   |
| ILK           | 0.224751 | 2.87E-06    | 3611   |
| IRGQ          | 0.22475  | 2.87E-06    | 126298 |
| TMEM5         | 0.224727 | 2.88E-06 NA |        |
| GRM7          | 0.224652 | 2.90E-06    | 2917   |
| EPB41L2       | 0.224594 | 2.92E-06    | 2037   |
| GGN           | 0.224573 | 2.93E-06    | 199720 |
| ABCF1         | 0.224533 | 2.94E-06    | 23     |
| MRFAP1        | 0.22448  | 2.95E-06    | 93621  |
| ZNF227        | 0.224421 | 2.97E-06    | 7770   |
| CMIP          | 0.224409 | 2.98E-06    | 80790  |
| WDR7          | 0.224378 | 2.99E-06    | 23335  |
| ITGA9         | 0.224356 | 2.99E-06    | 3680   |
| ZNF345        | 0.224338 | 3.00E-06    | 25850  |
| HDAC2         | 0.224281 | 3.02E-06    | 3066   |
| SCARB2        | 0.224273 | 3.02E-06    | 950    |
| MYEF2         | 0.224257 | 3.02E-06    | 50804  |
| RPP30         | 0.224212 | 3.04E-06    | 10556  |
| XPOT          | 0.224196 | 3.04E-06    | 11260  |
| SLC12A5       | 0.224187 | 3.05E-06    | 57468  |
| CCL3L3        | 0.22418  | 3.05E-06    | 414062 |
| ZNF74         | 0.224136 | 3.06E-06    | 7625   |
| CD38          | 0.224129 | 3.06E-06    | 952    |
| ZFP30         | 0.224115 | 3.07E-06    | 22835  |
| TMEM33        | 0.22411  | 3.07E-06    | 55161  |
| WDR60         | 0.224056 | 3.09E-06 NA |        |
| APBB1         | 0.224048 | 3.09E-06    | 322    |
| SLC1A4        | 0.224027 | 3.10E-06    | 6509   |
| KLHDC10       | 0.223995 | 3.11E-06    | 23008  |
| ARL9          | 0.223995 | 3.11E-06    | 132946 |
| SYS1-DBNDD2   | 0.223928 | 3.13E-06    | 767557 |
| S100A3        | 0.223921 | 3.13E-06    | 6274   |
| URB2          | 0.223895 | 3.14E-06    | 9816   |
| SF3A1         | 0.223865 | 3.15E-06    | 10291  |
| H1FO          | 0.22381  | 3.17E-06 NA |        |
| RP11-872D17.8 | 0.223801 | 3.17E-06 NA |        |
| RNF141        | 0.223767 | 3.18E-06    | 50862  |
| IFIT1         | 0.223753 | 3.19E-06    | 3434   |
| RRP36         | 0.223712 | 3.20E-06    | 88745  |
| CIDEB         | 0.223688 | 3.21E-06    | 27141  |
| WDR27         | 0.223679 | 3.21E-06    | 253769 |
| TFPT          | 0.223671 | 3.21E-06    | 29844  |
| FBXL20        | 0.223635 | 3.23E-06    | 84961  |
| WT1           | 0.223624 | 3.23E-06    | 7490   |
| FARP1         | 0.223596 | 3.24E-06    | 10160  |
| RAPGEF5       | 0.223518 | 3.27E-06    | 9771   |
| PCMT1         | 0.22351  | 3.27E-06    | 5110   |
| RRP8          | 0.223493 | 3.27E-06    | 23378  |
| USP10         | 0.22349  | 3.28E-06    | 9100   |
| SLC22A1       | 0.223478 | 3.28E-06    | 6580   |
| IL10          | 0.223439 | 3.29E-06    | 3586   |
| TOM1          | 0.223439 | 3.29E-06    | 10043  |
| TMEM121       | 0.223414 | 3.30E-06    | 80757  |
| SNAP47        | 0.223394 | 3.31E-06    | 116841 |

|              |          |             |           |
|--------------|----------|-------------|-----------|
| HAS3         | 0.223373 | 3.31E-06    | 3038      |
| PABPC4       | 0.223373 | 3.32E-06    | 8761      |
| SYF2         | 0.223357 | 3.32E-06    | 25949     |
| MAPK14       | 0.223336 | 3.33E-06    | 1432      |
| EIF2B2       | 0.223335 | 3.33E-06    | 8892      |
| WDYHV1       | 0.223324 | 3.33E-06 NA |           |
| DCLRE1A      | 0.223323 | 3.33E-06    | 9937      |
| RBM45        | 0.223304 | 3.34E-06    | 129831    |
| PHLDA1       | 0.223301 | 3.34E-06    | 22822     |
| MAPK10       | 0.223269 | 3.35E-06    | 5602      |
| USP16        | 0.22326  | 3.35E-06    | 10600     |
| PNMA1        | 0.223201 | 3.37E-06    | 9240      |
| EFCAB10      | 0.2232   | 3.37E-06    | 100130771 |
| ABCD2        | 0.223167 | 3.39E-06    | 225       |
| ANKRD31      | 0.223149 | 3.39E-06    | 256006    |
| ZSCAN25      | 0.223146 | 3.39E-06    | 221785    |
| NSUN3        | 0.223077 | 3.42E-06    | 63899     |
| DEDD         | 0.22304  | 3.43E-06    | 9191      |
| NMI          | 0.22296  | 3.46E-06    | 9111      |
| SEMA3A       | 0.222946 | 3.46E-06    | 10371     |
| GSTA4        | 0.222941 | 3.47E-06    | 2941      |
| IRF2BP2      | 0.222932 | 3.47E-06    | 359948    |
| DCAF7        | 0.222894 | 3.48E-06    | 10238     |
| FNTB         | 0.222889 | 3.48E-06    | 2342      |
| ACTB         | 0.222887 | 3.49E-06    | 60        |
| CTC-454I21.3 | 0.222874 | 3.49E-06 NA |           |
| NOL11        | 0.222866 | 3.49E-06    | 25926     |
| RNF31        | 0.22283  | 3.51E-06    | 55072     |
| URI1         | 0.222785 | 3.52E-06    | 8725      |
| EIF2A        | 0.222782 | 3.52E-06    | 83939     |
| TOB2         | 0.222732 | 3.54E-06    | 10766     |
| PPM1H        | 0.222722 | 3.55E-06    | 57460     |
| ITGB4        | 0.222721 | 3.55E-06    | 3691      |
| ARMCX5       | 0.222709 | 3.55E-06    | 64860     |
| RMND1        | 0.222707 | 3.55E-06    | 55005     |
| PDE5A        | 0.222651 | 3.57E-06    | 8654      |
| IMMP2L       | 0.222638 | 3.58E-06    | 83943     |
| AQP3         | 0.222636 | 3.58E-06    | 360       |
| STAMBPL1     | 0.222632 | 3.58E-06    | 57559     |
| TRMT12       | 0.222627 | 3.58E-06    | 55039     |
| PLOD2        | 0.222622 | 3.58E-06    | 5352      |
| ATN1         | 0.222611 | 3.59E-06    | 1822      |
| KIAA0556     | 0.222562 | 3.60E-06 NA |           |
| CD1E         | 0.222541 | 3.61E-06    | 913       |
| MED29        | 0.222533 | 3.62E-06    | 55588     |
| ERICH1       | 0.222503 | 3.63E-06    | 157697    |
| CIR1         | 0.222501 | 3.63E-06    | 9541      |
| RRP12        | 0.2225   | 3.63E-06    | 23223     |
| ZNF22        | 0.222471 | 3.64E-06    | 7570      |
| SEMA4A       | 0.222448 | 3.65E-06    | 64218     |
| STRIP1       | 0.222434 | 3.65E-06    | 85369     |
| UBE2B        | 0.22242  | 3.66E-06    | 7320      |
| LRRN4        | 0.222395 | 3.67E-06    | 164312    |
| ZNF681       | 0.222389 | 3.67E-06    | 148213    |
| UCP3         | 0.222387 | 3.67E-06    | 7352      |
| ZSCAN29      | 0.222361 | 3.68E-06    | 146050    |
| RELB         | 0.222355 | 3.68E-06    | 5971      |
| SRF          | 0.222338 | 3.69E-06    | 6722      |
| GOSR1        | 0.222332 | 3.69E-06    | 9527      |
| ZNF786       | 0.222295 | 3.71E-06    | 136051    |

|             |          |             |        |
|-------------|----------|-------------|--------|
| NCL         | 0.222282 | 3.71E-06    | 4691   |
| ATG16L1     | 0.22227  | 3.72E-06    | 55054  |
| IL27        | 0.222261 | 3.72E-06    | 246778 |
| TEX29       | 0.222232 | 3.73E-06    | 121793 |
| ZNF251      | 0.222199 | 3.74E-06    | 90987  |
| TMED7       | 0.222184 | 3.75E-06    | 51014  |
| PCGF2       | 0.222133 | 3.77E-06    | 7703   |
| CD52        | 0.222126 | 3.77E-06    | 1043   |
| PSMD6       | 0.222124 | 3.77E-06    | 9861   |
| PCDHB6      | 0.222122 | 3.77E-06    | 56130  |
| MAP3K19     | 0.222099 | 3.78E-06    | 80122  |
| POGZ        | 0.222095 | 3.78E-06    | 23126  |
| TRIM52      | 0.222061 | 3.80E-06    | 84851  |
| MBLAC2      | 0.222032 | 3.81E-06    | 153364 |
| YTHDF2      | 0.222    | 3.82E-06    | 51441  |
| RIC8A       | 0.221904 | 3.86E-06    | 60626  |
| ZNF75D      | 0.221867 | 3.87E-06    | 7626   |
| NONO        | 0.221857 | 3.88E-06    | 4841   |
| RGS5        | 0.221848 | 3.88E-06    | 8490   |
| ZNF583      | 0.221822 | 3.89E-06    | 147949 |
| MED28       | 0.221742 | 3.92E-06    | 80306  |
| HES5        | -0.22173 | 3.93E-06    | 388585 |
| ZUFSP       | 0.22172  | 3.93E-06 NA |        |
| ARHGEF40    | 0.221682 | 3.95E-06    | 55701  |
| TMEM107     | 0.221647 | 3.96E-06    | 84314  |
| RNF139      | 0.221639 | 3.96E-06    | 11236  |
| POLR3C      | 0.221635 | 3.97E-06    | 10623  |
| ERBB2IP     | 0.221614 | 3.97E-06 NA |        |
| AGAP3       | 0.221507 | 4.02E-06    | 116988 |
| CETN2       | 0.221416 | 4.06E-06    | 1069   |
| CASP8       | 0.221405 | 4.06E-06    | 841    |
| PMM2        | 0.221342 | 4.09E-06    | 5373   |
| SPIN3       | 0.22129  | 4.11E-06    | 169981 |
| TMEM218     | 0.221283 | 4.11E-06    | 219854 |
| LIPT1       | 0.221252 | 4.12E-06    | 51601  |
| LCORL       | 0.221249 | 4.13E-06    | 254251 |
| MGAT5       | 0.221236 | 4.13E-06    | 4249   |
| MTOR        | 0.221224 | 4.14E-06    | 2475   |
| MYO1H       | 0.221221 | 4.14E-06    | 283446 |
| MDM1        | 0.221175 | 4.16E-06    | 56890  |
| RAB14       | 0.221158 | 4.16E-06    | 51552  |
| CDH3        | 0.221138 | 4.17E-06    | 1001   |
| WDR45B      | 0.221088 | 4.19E-06    | 56270  |
| RRP1B       | 0.221063 | 4.21E-06    | 23076  |
| SCAPER      | 0.221014 | 4.23E-06    | 49855  |
| DDX20       | 0.221003 | 4.23E-06    | 11218  |
| TNPO2       | 0.220969 | 4.25E-06    | 30000  |
| ERMARD      | 0.220938 | 4.26E-06    | 55780  |
| FRG1        | 0.220897 | 4.28E-06    | 2483   |
| ADAMTS18    | 0.220881 | 4.28E-06    | 170692 |
| ZNF234      | 0.220875 | 4.29E-06    | 10780  |
| KIAA1377    | 0.220854 | 4.30E-06 NA |        |
| LEMD3       | 0.220846 | 4.30E-06    | 23592  |
| GIMAP1      | 0.220844 | 4.30E-06    | 170575 |
| SEC61A1     | 0.220835 | 4.30E-06    | 29927  |
| EDARADD     | 0.220829 | 4.31E-06    | 128178 |
| CCDC132     | 0.220828 | 4.31E-06 NA |        |
| GS1-114I9.3 | 0.220827 | 4.31E-06 NA |        |
| ELP2        | 0.220797 | 4.32E-06    | 55250  |
| PSMD11      | 0.220786 | 4.33E-06    | 5717   |



|                |          |             |        |
|----------------|----------|-------------|--------|
| GPN3           | 0.22078  | 4.33E-06    | 51184  |
| ZNF384         | 0.220776 | 4.33E-06    | 171017 |
| CXCR2          | 0.220752 | 4.34E-06    | 3579   |
| INO80          | 0.220752 | 4.34E-06    | 54617  |
| IRF7           | 0.220743 | 4.35E-06    | 3665   |
| EXOC7          | 0.220705 | 4.36E-06    | 23265  |
| MAPK8IP1       | 0.2207   | 4.36E-06    | 9479   |
| UNKL           | 0.220688 | 4.37E-06    | 64718  |
| P2RY13         | 0.220686 | 4.37E-06    | 53829  |
| ECT2           | 0.220674 | 4.38E-06    | 1894   |
| OBSL1          | 0.220673 | 4.38E-06    | 23363  |
| TCEAL1         | 0.220624 | 4.40E-06    | 9338   |
| NRDE2          | 0.220621 | 4.40E-06    | 55051  |
| PPP1R3B        | 0.220591 | 4.41E-06    | 79660  |
| MTF1           | 0.220579 | 4.42E-06    | 4520   |
| TMEM108        | 0.220563 | 4.43E-06    | 66000  |
| IFT88          | 0.220555 | 4.43E-06    | 8100   |
| LSM12          | 0.220548 | 4.43E-06    | 124801 |
| SUPT16H        | 0.220536 | 4.44E-06    | 11198  |
| SEC61A2        | 0.220517 | 4.45E-06    | 55176  |
| RABL2B         | 0.220499 | 4.46E-06    | 11158  |
| PRKCE          | 0.220476 | 4.47E-06    | 5581   |
| CLTC           | 0.220419 | 4.49E-06    | 1213   |
| ZFYVE9         | 0.220415 | 4.49E-06    | 9372   |
| ANKH           | 0.220377 | 4.51E-06    | 56172  |
| SNX14          | 0.220368 | 4.52E-06    | 57231  |
| AC006116.20    | 0.220362 | 4.52E-06 NA |        |
| WIPI2          | 0.22032  | 4.54E-06    | 26100  |
| RUFY1          | 0.220304 | 4.55E-06    | 80230  |
| DNAJC2         | 0.220293 | 4.55E-06    | 27000  |
| REXO2          | 0.220267 | 4.56E-06    | 25996  |
| GRPEL2         | 0.22026  | 4.57E-06    | 134266 |
| SIX4           | 0.220237 | 4.58E-06    | 51804  |
| DCAF6          | 0.220236 | 4.58E-06    | 55827  |
| CHTF8          | 0.220227 | 4.58E-06    | 54921  |
| KIF5B          | 0.220197 | 4.60E-06    | 3799   |
| MITD1          | 0.220191 | 4.60E-06    | 129531 |
| GCA            | 0.220189 | 4.60E-06    | 25801  |
| C15orf27       | 0.22018  | 4.60E-06 NA |        |
| NSUN6          | 0.220159 | 4.61E-06    | 221078 |
| WRB            | 0.220131 | 4.63E-06 NA |        |
| TGIF2-C20orf24 | 0.220119 | 4.63E-06 NA |        |
| KIF1B          | 0.220077 | 4.65E-06    | 23095  |
| LAMP1          | 0.220057 | 4.66E-06    | 3916   |
| ATP9B          | 0.220044 | 4.67E-06    | 374868 |
| NUPL2          | 0.220017 | 4.68E-06 NA |        |
| NSMCE2         | 0.220012 | 4.68E-06    | 286053 |
| RSPH3          | 0.219977 | 4.70E-06    | 83861  |
| TYW1           | 0.219916 | 4.73E-06    | 55253  |
| TAS2R14        | 0.219874 | 4.75E-06    | 50840  |
| CENPQ          | 0.219858 | 4.76E-06    | 55166  |
| SNX6           | 0.219825 | 4.77E-06    | 58533  |
| NAA35          | 0.219795 | 4.79E-06    | 60560  |
| TECTB          | 0.219769 | 4.80E-06    | 6975   |
| RNF6           | 0.21971  | 4.83E-06    | 6049   |
| CACHD1         | 0.219681 | 4.84E-06    | 57685  |
| PCDHGA7        | 0.21965  | 4.86E-06    | 56108  |
| SRGAP3         | 0.219646 | 4.86E-06    | 9901   |
| ZNF3           | 0.219643 | 4.86E-06    | 7551   |
| C22orf46       | 0.219621 | 4.87E-06    | 79640  |

|              |          |          |           |
|--------------|----------|----------|-----------|
| MICA         | 0.219613 | 4.88E-06 | 100507436 |
| RP11-295K3.1 | 0.219603 | 4.88E-06 | NA        |
| CNTF         | 0.219502 | 4.93E-06 | 1270      |
| CYP3A43      | 0.219498 | 4.93E-06 | 64816     |
| SOX18        | 0.219479 | 4.94E-06 | 54345     |
| RAB38        | 0.219469 | 4.95E-06 | 23682     |
| CD74         | 0.219452 | 4.96E-06 | 972       |
| LRRC63       | 0.219425 | 4.97E-06 | 220416    |
| TRIM29       | 0.219411 | 4.98E-06 | 23650     |
| SQSTM1       | 0.219388 | 4.99E-06 | 8878      |
| PLA2G4E      | 0.219386 | 4.99E-06 | 123745    |
| SLC35B2      | 0.219377 | 5.00E-06 | 347734    |
| DENND4C      | 0.21937  | 5.00E-06 | 55667     |
| ARNTL        | 0.219368 | 5.00E-06 | 406       |
| TFAM         | 0.21935  | 5.01E-06 | 7019      |
| PROSER2      | 0.219324 | 5.02E-06 | 254427    |
| CA11         | 0.219316 | 5.03E-06 | 770       |
| PSMC6        | 0.219268 | 5.05E-06 | 5706      |
| NAPB         | 0.219213 | 5.08E-06 | 63908     |
| PRKAG1       | 0.219179 | 5.10E-06 | 5571      |
| MESDC2       | 0.21915  | 5.11E-06 | NA        |
| ANKRD35      | 0.219115 | 5.13E-06 | 148741    |
| MGARP        | 0.219112 | 5.13E-06 | 84709     |
| C12orf65     | 0.21911  | 5.13E-06 | 91574     |
| ZNF346       | 0.219081 | 5.15E-06 | 23567     |
| ZNF629       | 0.218996 | 5.19E-06 | 23361     |
| TBC1D31      | 0.218976 | 5.20E-06 | 93594     |
| TCEAL8       | 0.21897  | 5.21E-06 | 90843     |
| TMEM214      | 0.218945 | 5.22E-06 | 54867     |
| ASB1         | 0.218921 | 5.23E-06 | 51665     |
| TCEAL7       | 0.21892  | 5.23E-06 | 56849     |
| WDR5B        | 0.21891  | 5.24E-06 | 54554     |
| MED26        | 0.218893 | 5.25E-06 | 9441      |
| AK8          | 0.218872 | 5.26E-06 | 158067    |
| CCL17        | 0.218866 | 5.26E-06 | 6361      |
| MYLIP        | 0.218851 | 5.27E-06 | 29116     |
| CKB          | -0.21882 | 5.29E-06 | 1152      |
| CWF19L1      | 0.218766 | 5.32E-06 | 55280     |
| ELK1         | 0.218756 | 5.32E-06 | 2002      |
| POLG2        | 0.218752 | 5.32E-06 | 11232     |
| NUFIP1       | 0.218715 | 5.34E-06 | 26747     |
| FPGT         | 0.218663 | 5.37E-06 | 8790      |
| SLFN14       | 0.218663 | 5.37E-06 | 342618    |
| ODF2         | 0.218644 | 5.38E-06 | 4957      |
| DAAM2        | 0.218624 | 5.39E-06 | 23500     |
| E2F5         | 0.218583 | 5.41E-06 | 1875      |
| GCN1L1       | 0.21857  | 5.42E-06 | NA        |
| FLCN         | 0.218524 | 5.45E-06 | 201163    |
| CFAP43       | 0.218524 | 5.45E-06 | 80217     |
| STRAP        | 0.21846  | 5.48E-06 | 11171     |
| GNB1         | 0.218445 | 5.49E-06 | 2782      |
| SLMAP        | 0.218429 | 5.50E-06 | 7871      |
| KRBA2        | 0.218331 | 5.55E-06 | 124751    |
| NPTN         | 0.218319 | 5.56E-06 | 27020     |
| C21orf62     | 0.218309 | 5.57E-06 | 56245     |
| ZNF606       | 0.218303 | 5.57E-06 | 80095     |
| LY6E         | 0.218296 | 5.57E-06 | 4061      |
| YOD1         | 0.218288 | 5.58E-06 | 55432     |
| POLR3F       | 0.218252 | 5.60E-06 | 10621     |
| NAPG         | 0.218233 | 5.61E-06 | 8774      |

|                 |          |             |           |
|-----------------|----------|-------------|-----------|
| AZIN2           | 0.218213 | 5.62E-06    | 113451    |
| NUP93           | 0.21819  | 5.63E-06    | 9688      |
| RPRD2           | 0.218188 | 5.64E-06    | 23248     |
| DIABLO          | 0.21818  | 5.64E-06    | 56616     |
| MOGAT1          | 0.218133 | 5.67E-06    | 116255    |
| HEPHL1          | 0.218127 | 5.67E-06    | 341208    |
| KCNMB3          | 0.218084 | 5.70E-06    | 27094     |
| PPP1CB          | 0.218064 | 5.71E-06    | 5500      |
| ALKBH5          | 0.21805  | 5.71E-06    | 54890     |
| ZC3H12B         | 0.218028 | 5.73E-06    | 340554    |
| ACVR2B          | 0.218019 | 5.73E-06    | 93        |
| NCF1            | 0.218017 | 5.73E-06    | 653361    |
| FBXO45          | 0.218016 | 5.73E-06    | 200933    |
| C22orf23        | 0.218014 | 5.74E-06    | 84645     |
| NUP205          | 0.217998 | 5.74E-06    | 23165     |
| KANSL2          | 0.217982 | 5.75E-06    | 54934     |
| TRAF5           | 0.217964 | 5.76E-06    | 7188      |
| FAM217A         | 0.217943 | 5.78E-06    | 222826    |
| LACE1           | 0.217901 | 5.80E-06 NA |           |
| ZNF142          | 0.217794 | 5.86E-06    | 7701      |
| AIG1            | 0.217762 | 5.88E-06    | 51390     |
| KCNC3           | 0.217754 | 5.89E-06    | 3748      |
| DIAPH2          | 0.217753 | 5.89E-06    | 1730      |
| RPGRIP1         | 0.217752 | 5.89E-06    | 57096     |
| RGS10           | 0.217743 | 5.89E-06    | 6001      |
| RAC2            | 0.217738 | 5.90E-06    | 5880      |
| ANKRD61         | 0.21773  | 5.90E-06    | 100310846 |
| FBXO27          | 0.217724 | 5.91E-06    | 126433    |
| KLHL9           | 0.217715 | 5.91E-06    | 55958     |
| YKT6            | 0.217676 | 5.93E-06    | 10652     |
| HYOU1           | 0.217665 | 5.94E-06    | 10525     |
| CADM1           | 0.217664 | 5.94E-06    | 23705     |
| PNO1            | 0.217664 | 5.94E-06    | 56902     |
| SLC35E2         | 0.217662 | 5.94E-06 NA |           |
| PPP1R3C         | 0.217649 | 5.95E-06    | 5507      |
| PISD            | 0.217641 | 5.96E-06    | 23761     |
| PIGA            | 0.21764  | 5.96E-06    | 5277      |
| AMD1            | 0.217631 | 5.96E-06    | 262       |
| C16orf46        | 0.217627 | 5.96E-06    | 123775    |
| ZNF577          | 0.217611 | 5.97E-06    | 84765     |
| HDLBP           | 0.217582 | 5.99E-06    | 3069      |
| PRKRA           | 0.217545 | 6.01E-06    | 8575      |
| ANKHD1-EIF4EBP3 | 0.217522 | 6.03E-06    | 404734    |
| COMMD9          | 0.217488 | 6.05E-06    | 29099     |
| TAS2R13         | 0.217482 | 6.05E-06    | 50838     |
| NUP54           | 0.21744  | 6.08E-06    | 53371     |
| SF3B3           | 0.217428 | 6.08E-06    | 23450     |
| ZPR1            | 0.2174   | 6.10E-06    | 8882      |
| LINS            | 0.217399 | 6.10E-06 NA |           |
| VPS72           | 0.217396 | 6.10E-06    | 6944      |
| TCERG1          | 0.217347 | 6.13E-06    | 10915     |
| 6-3月            | 0.217346 | 6.14E-06 NA |           |
| PDE3B           | 0.217321 | 6.15E-06    | 5140      |
| EHBP1L1         | 0.217282 | 6.17E-06    | 254102    |
| NOMO2           | 0.217279 | 6.18E-06    | 283820    |
| PRKACA          | 0.217278 | 6.18E-06    | 5566      |
| CCNA1           | 0.217276 | 6.18E-06    | 8900      |
| CLP1            | 0.217275 | 6.18E-06    | 10978     |
| KLHL10          | 0.217266 | 6.18E-06    | 317719    |
| CCDC178         | 0.217246 | 6.20E-06    | 374864    |

|          |          |             |           |
|----------|----------|-------------|-----------|
| C9orf85  | 0.217241 | 6.20E-06    | 138241    |
| RPRD1B   | 0.217233 | 6.21E-06    | 58490     |
| OPHN1    | 0.217217 | 6.22E-06    | 4983      |
| CAPRIN2  | 0.217195 | 6.23E-06    | 65981     |
| CDIPT    | 0.217175 | 6.24E-06    | 10423     |
| SLC26A11 | 0.217172 | 6.24E-06    | 284129    |
| SWI5     | 0.21713  | 6.27E-06    | 375757    |
| PPFIA4   | 0.217099 | 6.29E-06    | 8497      |
| ATP11B   | 0.217088 | 6.30E-06    | 23200     |
| TARDBP   | 0.217076 | 6.30E-06    | 23435     |
| VAMP1    | 0.217033 | 6.33E-06    | 6843      |
| RIOK2    | 0.217019 | 6.34E-06    | 55781     |
| CERS2    | 0.217018 | 6.34E-06    | 29956     |
| CD2      | 0.217012 | 6.34E-06    | 914       |
| HEXB     | 0.216975 | 6.37E-06    | 3074      |
| ARSJ     | 0.216971 | 6.37E-06    | 79642     |
| CASP2    | 0.216962 | 6.38E-06    | 835       |
| UPK3B    | 0.216961 | 6.38E-06    | 105375355 |
| EPB41L1  | 0.216941 | 6.39E-06    | 2036      |
| ELMOD3   | 0.216916 | 6.41E-06    | 84173     |
| ZNF202   | 0.216914 | 6.41E-06    | 7753      |
| MPPED2   | 0.216899 | 6.42E-06    | 744       |
| WBP11    | 0.216892 | 6.42E-06    | 51729     |
| DCAF12   | 0.216881 | 6.43E-06    | 25853     |
| CWC25    | 0.216877 | 6.43E-06    | 54883     |
| SCOC     | 0.216859 | 6.44E-06    | 60592     |
| KDM3B    | 0.216853 | 6.45E-06    | 51780     |
| NBPF11   | 0.216824 | 6.47E-06    | 200030    |
| IREB2    | 0.216814 | 6.47E-06    | 3658      |
| SRP68    | 0.216798 | 6.48E-06    | 6730      |
| LRRD1    | 0.216758 | 6.51E-06    | 401387    |
| PKN2     | 0.216755 | 6.51E-06    | 5586      |
| SKIV2L2  | 0.21675  | 6.51E-06 NA |           |
| MEGF8    | 0.216742 | 6.52E-06    | 1954      |
| TTLL7    | 0.216701 | 6.55E-06    | 79739     |
| ANKRD29  | 0.216674 | 6.56E-06    | 147463    |
| GRIP1    | 0.216651 | 6.58E-06    | 23426     |
| KIAA1147 | 0.216633 | 6.59E-06 NA |           |
| CLCC1    | 0.216625 | 6.60E-06    | 23155     |
| MFAP1    | 0.2166   | 6.61E-06    | 4236      |
| GOLGB1   | 0.216595 | 6.62E-06    | 2804      |
| ZNF473   | 0.216589 | 6.62E-06    | 25888     |
| RBM22    | 0.216572 | 6.63E-06    | 55696     |
| TOP1     | 0.216565 | 6.64E-06    | 7150      |
| NCOA6    | 0.216544 | 6.65E-06    | 23054     |
| MOB4     | 0.216432 | 6.73E-06    | 25843     |
| SPIN4    | 0.216426 | 6.73E-06    | 139886    |
| DBT      | 0.216422 | 6.73E-06    | 1629      |
| RPF2     | 0.216405 | 6.74E-06    | 84154     |
| POLR3G   | 0.216402 | 6.75E-06    | 10622     |
| VPS11    | 0.216379 | 6.76E-06    | 55823     |
| UBE2I    | 0.216374 | 6.76E-06    | 7329      |
| SMARCC2  | 0.216364 | 6.77E-06    | 6601      |
| AMZ2     | 0.216255 | 6.85E-06    | 51321     |
| CHERP    | 0.21623  | 6.86E-06    | 10523     |
| KCTD2    | 0.21622  | 6.87E-06    | 23510     |
| AASDH    | 0.216218 | 6.87E-06    | 132949    |
| PPP6R1   | 0.216205 | 6.88E-06    | 22870     |
| GDF7     | 0.216181 | 6.90E-06    | 151449    |
| ZNF284   | 0.216177 | 6.90E-06    | 342909    |

|              |          |             |           |
|--------------|----------|-------------|-----------|
| BRD7         | 0.216171 | 6.90E-06    | 29117     |
| TAP2         | 0.216166 | 6.91E-06    | 6891      |
| ARHGEF2      | 0.216163 | 6.91E-06    | 9181      |
| MORN4        | 0.216161 | 6.91E-06    | 118812    |
| CD97         | 0.216112 | 6.94E-06 NA |           |
| DHX16        | 0.216101 | 6.95E-06    | 8449      |
| TMC3         | 0.216093 | 6.96E-06    | 342125    |
| PRF1         | 0.216035 | 7.00E-06    | 5551      |
| TPCN2        | 0.216035 | 7.00E-06    | 219931    |
| ATAD2        | 0.216018 | 7.01E-06    | 29028     |
| TIPRL        | 0.216002 | 7.02E-06    | 261726    |
| SASH3        | 0.215997 | 7.03E-06    | 54440     |
| CDK15        | 0.215983 | 7.04E-06    | 65061     |
| BTG3         | 0.215981 | 7.04E-06    | 10950     |
| USP9X        | 0.215962 | 7.05E-06    | 8239      |
| KANK1        | 0.215935 | 7.07E-06    | 23189     |
| DDX31        | 0.215928 | 7.07E-06    | 64794     |
| RNF103-CHMP3 | 0.21592  | 7.08E-06    | 100526767 |
| KDELR3       | 0.215848 | 7.13E-06    | 11015     |
| STK38L       | 0.215818 | 7.15E-06    | 23012     |
| MAPRE1       | 0.215755 | 7.20E-06    | 22919     |
| HERC2        | 0.215744 | 7.21E-06    | 8924      |
| ZNF273       | 0.215718 | 7.22E-06    | 10793     |
| SNAPC5       | 0.215702 | 7.24E-06    | 10302     |
| CMTM2        | 0.215693 | 7.24E-06    | 146225    |
| SMIM7        | 0.215671 | 7.26E-06    | 79086     |
| CPOX         | 0.215629 | 7.29E-06    | 1371      |
| KIF14        | 0.215623 | 7.29E-06    | 9928      |
| ST3GAL5      | 0.2156   | 7.31E-06    | 8869      |
| TCAIM        | 0.215592 | 7.32E-06    | 285343    |
| WDSUB1       | 0.215589 | 7.32E-06    | 151525    |
| ZNF217       | 0.215564 | 7.34E-06    | 7764      |
| AC003002.6   | 0.215533 | 7.36E-06 NA |           |
| SUMO1        | 0.215492 | 7.39E-06    | 7341      |
| SYPL2        | 0.215489 | 7.39E-06    | 284612    |
| CBX4         | 0.215463 | 7.41E-06    | 8535      |
| ZNF300       | 0.215463 | 7.41E-06    | 91975     |
| DNASE1L1     | 0.21546  | 7.41E-06    | 1774      |
| VPS33A       | 0.215453 | 7.42E-06    | 65082     |
| KANK4        | 0.215358 | 7.49E-06    | 163782    |
| PTPRJ        | 0.215334 | 7.51E-06    | 5795      |
| FBXO32       | 0.215328 | 7.51E-06    | 114907    |
| ANXA3        | 0.215327 | 7.51E-06    | 306       |
| METTL4       | 0.215317 | 7.52E-06    | 64863     |
| STAU1        | 0.215298 | 7.53E-06    | 6780      |
| RP11-468E2.4 | 0.215246 | 7.57E-06 NA |           |
| SLC12A2      | 0.215242 | 7.58E-06    | 6558      |
| TXNDC9       | 0.215227 | 7.59E-06    | 10190     |
| CSDE1        | 0.215222 | 7.59E-06    | 7812      |
| PCDHB3       | 0.215215 | 7.60E-06    | 56132     |
| TBP          | 0.215212 | 7.60E-06    | 6908      |
| SLCO1B1      | 0.2152   | 7.61E-06    | 10599     |
| ZNF383       | 0.21517  | 7.63E-06    | 163087    |
| GPBAR1       | 0.215156 | 7.64E-06    | 151306    |
| SKAP2        | 0.215119 | 7.67E-06    | 8935      |
| ANAPC4       | 0.215117 | 7.67E-06    | 29945     |
| ITFG1        | 0.215117 | 7.67E-06    | 81533     |
| PTPN2        | 0.215116 | 7.67E-06    | 5771      |
| PSMD1        | 0.2151   | 7.68E-06    | 5707      |
| ZNF26        | 0.215043 | 7.73E-06    | 7574      |

|          |          |             |        |
|----------|----------|-------------|--------|
| MED4     | 0.215043 | 7.73E-06    | 29079  |
| RSL1D1   | 0.214961 | 7.79E-06    | 26156  |
| TRIM34   | 0.214916 | 7.83E-06    | 53840  |
| ZMYND8   | 0.214907 | 7.83E-06    | 23613  |
| PDE6D    | 0.214883 | 7.85E-06    | 5147   |
| FTSJ2    | 0.214879 | 7.85E-06 NA |        |
| TMEM181  | 0.214866 | 7.86E-06    | 57583  |
| BIN2     | 0.214852 | 7.88E-06    | 51411  |
| MUC16    | 0.214828 | 7.89E-06    | 94025  |
| PMP22    | 0.214818 | 7.90E-06    | 5376   |
| SEN2     | 0.214807 | 7.91E-06    | 59343  |
| ZNF200   | 0.214791 | 7.92E-06    | 7752   |
| CCDC168  | 0.214763 | 7.95E-06    | 643677 |
| NR2E3    | 0.214731 | 7.97E-06    | 10002  |
| PDE10A   | 0.214683 | 8.01E-06    | 10846  |
| RAB35    | 0.214665 | 8.02E-06    | 11021  |
| AKAP8    | 0.214632 | 8.05E-06    | 10270  |
| IL9R     | 0.214595 | 8.08E-06    | 3581   |
| PDE4A    | 0.214585 | 8.09E-06    | 5141   |
| BRSK1    | 0.214558 | 8.11E-06    | 84446  |
| NAMPT    | 0.214527 | 8.13E-06    | 10135  |
| LIN7C    | 0.214516 | 8.14E-06    | 55327  |
| USP1     | 0.2145   | 8.16E-06    | 7398   |
|          | 6-9月     |             |        |
| SFR1     | 0.214484 | 8.17E-06 NA |        |
| LAMP3    | 0.214471 | 8.18E-06    | 119392 |
| PSG9     | 0.214448 | 8.20E-06    | 27074  |
| PSG9     | 0.214448 | 8.20E-06    | 5678   |
| DTD2     | 0.214439 | 8.21E-06    | 112487 |
| USPL1    | 0.214411 | 8.23E-06    | 10208  |
| RBMX     | 0.214398 | 8.24E-06    | 27316  |
| TAF13    | 0.214367 | 8.26E-06    | 6884   |
| MSH3     | 0.214351 | 8.28E-06    | 4437   |
| CDK5RAP2 | 0.214351 | 8.28E-06    | 55755  |
| PCDHA9   | 0.214328 | 8.30E-06    | 9752   |
| UTP14C   | 0.214254 | 8.36E-06    | 9724   |
| ATP6V0C  | 0.214249 | 8.36E-06    | 527    |
| CAD      | 0.214234 | 8.37E-06    | 790    |
| IKBKB    | 0.214233 | 8.38E-06    | 3551   |
| SRD5A1   | 0.214203 | 8.40E-06    | 6715   |
| PIM2     | 0.214195 | 8.41E-06    | 11040  |
| DIO1     | 0.214194 | 8.41E-06    | 1733   |
| HAP1     | 0.214107 | 8.48E-06    | 9001   |
| LRRC37A2 | 0.214089 | 8.50E-06    | 474170 |
| PROX2    | 0.214055 | 8.52E-06    | 283571 |
| FYCO1    | 0.213986 | 8.58E-06    | 79443  |
| PGS1     | 0.213978 | 8.59E-06    | 9489   |
| PDCD2    | 0.213913 | 8.65E-06    | 5134   |
| C1orf74  | 0.213891 | 8.66E-06    | 148304 |
| IPPK     | 0.213866 | 8.69E-06    | 64768  |
| RAB40AL  | 0.213863 | 8.69E-06    | 282808 |
| MRPL42   | 0.213843 | 8.71E-06    | 28977  |
| CCDC138  | 0.213821 | 8.72E-06    | 165055 |
| PDPR     | 0.213756 | 8.78E-06    | 55066  |
| ZSCAN5A  | 0.213715 | 8.82E-06    | 79149  |
| NCBP2    | 0.21358  | 8.94E-06    | 22916  |
| CCNH     | 0.213578 | 8.94E-06    | 902    |
| RWDD2A   | 0.213564 | 8.95E-06    | 112611 |
| NHS      | 0.21353  | 8.98E-06    | 4810   |
| STPG2    | 0.213515 | 8.99E-06    | 285555 |
| THAP9    | 0.213485 | 9.02E-06    | 79725  |

|                |          |             |        |
|----------------|----------|-------------|--------|
| TOR1AIP2       | 0.213475 | 9.03E-06    | 163590 |
| PGAM1          | 0.213457 | 9.05E-06    | 5223   |
| IGFLR1         | 0.213427 | 9.07E-06    | 79713  |
| AC092881.1     | 0.213412 | 9.08E-06 NA |        |
| NEK6           | 0.213402 | 9.09E-06    | 10783  |
| ZRANB3         | 0.213397 | 9.10E-06    | 84083  |
| C6orf165       | 0.21339  | 9.11E-06 NA |        |
| DERL2          | 0.213372 | 9.12E-06    | 51009  |
| TSPAN16        | 0.21337  | 9.12E-06    | 26526  |
| ZNF84          | 0.213353 | 9.14E-06    | 7637   |
| CTD-2616J11.11 | 0.213302 | 9.18E-06 NA |        |
| UTP14A         | 0.213301 | 9.19E-06    | 10813  |
| FANCL          | 0.21329  | 9.20E-06    | 55120  |
| SSC4D          | 0.213179 | 9.30E-06    | 136853 |
| OARD1          | 0.213146 | 9.33E-06    | 221443 |
| PM20D2         | 0.213122 | 9.35E-06    | 135293 |
| EIF4G1         | 0.213114 | 9.36E-06    | 1981   |
| HMGXB3         | 0.213101 | 9.37E-06    | 22993  |
| ZDHHC5         | 0.213097 | 9.37E-06    | 25921  |
| RASAL3         | 0.213092 | 9.38E-06    | 64926  |
| NOP9           | 0.213081 | 9.39E-06    | 161424 |
| ABCC4          | 0.21307  | 9.40E-06    | 10257  |
| PTMA           | 0.213063 | 9.40E-06    | 5757   |
| LBR            | 0.213044 | 9.42E-06    | 3930   |
| HTRA2          | 0.213041 | 9.42E-06    | 27429  |
| NME6           | 0.213037 | 9.43E-06    | 10201  |
| DPH6           | 0.213033 | 9.43E-06    | 89978  |
| CPEB2          | 0.213033 | 9.43E-06    | 132864 |
| HNRNPL         | 0.213    | 9.46E-06    | 3191   |
| MIOS           | 0.212999 | 9.46E-06    | 54468  |
| KRBOX4         | 0.212998 | 9.46E-06    | 55634  |
| LIF            | 0.21299  | 9.47E-06    | 3976   |
| EIF4H          | 0.212987 | 9.47E-06    | 7458   |
| PRPF18         | 0.212983 | 9.48E-06    | 8559   |
| DDX23          | 0.212979 | 9.48E-06    | 9416   |
| AKIP1          | 0.212933 | 9.53E-06    | 56672  |
| ERN1           | 0.212903 | 9.55E-06    | 2081   |
| GSTCD          | 0.212896 | 9.56E-06    | 79807  |
| AP000721.4     | -0.21279 | 9.66E-06 NA |        |
| CLPX           | 0.212784 | 9.67E-06    | 10845  |
| KDM4C          | 0.212759 | 9.69E-06    | 23081  |
| ITGB3BP        | 0.212719 | 9.73E-06    | 23421  |
| ZNF418         | 0.212704 | 9.74E-06    | 147686 |
| SYNRG          | 0.212653 | 9.79E-06    | 11276  |
| TRIM65         | 0.212641 | 9.80E-06    | 201292 |
| IL12RB1        | 0.212625 | 9.82E-06    | 3594   |
| CXCL10         | 0.212618 | 9.83E-06    | 3627   |
| ZNF630         | 0.212617 | 9.83E-06    | 57232  |
| OPTN           | 0.212612 | 9.83E-06    | 10133  |
| PIK3R1         | 0.212604 | 9.84E-06    | 5295   |
| FLYWCH1        | 0.212587 | 9.86E-06    | 84256  |
| PCDHB15        | 0.212515 | 9.93E-06    | 56121  |
| CD37           | 0.212479 | 9.96E-06    | 951    |
| MPZL3          | 0.212467 | 9.97E-06    | 196264 |
| SUCO           | 0.212392 | 1.00E-05    | 51430  |
| CRAMP1L        | 0.212391 | 1.00E-05 NA |        |
| DYX1C1         | 0.212364 | 1.01E-05 NA |        |
| C20orf144      | 0.212349 | 1.01E-05    | 128864 |
| RBM5           | 0.212347 | 1.01E-05    | 10181  |
| RBMX2          | 0.212305 | 1.01E-05    | 51634  |

|          |          |             |        |
|----------|----------|-------------|--------|
| AUTS2    | 0.212294 | 1.01E-05    | 26053  |
| TMEM14A  | 0.21229  | 1.01E-05    | 28978  |
| CENPBD1  | 0.212281 | 1.02E-05    | 92806  |
| SMARCD1  | 0.212273 | 1.02E-05    | 6602   |
| CEP95    | 0.21227  | 1.02E-05    | 90799  |
| EMB      | 0.21226  | 1.02E-05    | 133418 |
| PATZ1    | 0.212259 | 1.02E-05    | 23598  |
| SLC38A1  | 0.212252 | 1.02E-05    | 81539  |
| TCEB3    | 0.212219 | 1.02E-05 NA |        |
| DNAH14   | 0.212182 | 1.03E-05    | 127602 |
| ROCK2    | 0.212167 | 1.03E-05    | 9475   |
| TXNRD1   | 0.212138 | 1.03E-05    | 7296   |
| ARL14EPL | 0.212119 | 1.03E-05    | 644100 |
| DYNLL1   | 0.212113 | 1.03E-05    | 8655   |
| ZNF419   | 0.212097 | 1.03E-05    | 79744  |
| ANKRD27  | 0.212095 | 1.03E-05    | 84079  |
| TSKU     | 0.212085 | 1.04E-05    | 25987  |
| DCAF16   | 0.21204  | 1.04E-05    | 54876  |
| ZCCHC2   | 0.212002 | 1.04E-05    | 54877  |
| DHX37    | 0.211999 | 1.04E-05    | 57647  |
| POLR1E   | 0.211995 | 1.04E-05    | 64425  |
| COA7     | 0.211982 | 1.05E-05    | 65260  |
| EIF3J    | 0.211981 | 1.05E-05    | 8669   |
| TDG      | 0.211979 | 1.05E-05    | 6996   |
| ZC3H18   | 0.2119   | 1.05E-05    | 124245 |
| OCM      | 0.211862 | 1.06E-05    | 654231 |
| NANP     | 0.211845 | 1.06E-05    | 140838 |
| PACRGL   | 0.211825 | 1.06E-05    | 133015 |
| IARS     | 0.211804 | 1.06E-05 NA |        |
| RRN3     | 0.211785 | 1.07E-05    | 54700  |
| POLE3    | 0.211774 | 1.07E-05    | 54107  |
| GPR63    | 0.211746 | 1.07E-05    | 81491  |
| LRBA     | 0.211744 | 1.07E-05    | 987    |
| GART     | 0.211651 | 1.08E-05    | 2618   |
| ANO2     | 0.211594 | 1.09E-05    | 57101  |
| TMOD3    | 0.211589 | 1.09E-05    | 29766  |
| CRBN     | 0.211585 | 1.09E-05    | 51185  |
| MIEF1    | 0.211561 | 1.09E-05    | 54471  |
| TM9SF3   | 0.211538 | 1.09E-05    | 56889  |
| NUP35    | 0.211536 | 1.09E-05    | 129401 |
| CRMP1    | 0.211535 | 1.09E-05    | 1400   |
| ANKRD1   | 0.211525 | 1.09E-05    | 27063  |
| DDX52    | 0.211504 | 1.10E-05    | 11056  |
| ZNF516   | 0.211467 | 1.10E-05    | 9658   |
| MAP1S    | 0.211438 | 1.10E-05    | 55201  |
| ZCCHC4   | 0.211429 | 1.10E-05    | 29063  |
| GALK2    | 0.211426 | 1.10E-05    | 2585   |
| ISY1     | 0.211419 | 1.11E-05    | 57461  |
| TMEM194A | 0.211407 | 1.11E-05 NA |        |
| TMEM260  | 0.211369 | 1.11E-05    | 54916  |
| GCNT7    | 0.211364 | 1.11E-05    | 140687 |
| ITIH4    | 0.211354 | 1.11E-05    | 3700   |
| EPN2     | 0.211353 | 1.11E-05    | 22905  |
| NFE2L3   | 0.211328 | 1.12E-05    | 9603   |
| ORC2     | 0.211326 | 1.12E-05    | 4999   |
| PIGB     | 0.211311 | 1.12E-05    | 9488   |
| HNRNPA3  | 0.211301 | 1.12E-05    | 220988 |
| PJA2     | 0.211273 | 1.12E-05    | 9867   |
| WFDC3    | 0.211271 | 1.12E-05    | 140686 |
| PAF1     | 0.211251 | 1.12E-05    | 54623  |



|          |          |             |        |
|----------|----------|-------------|--------|
| PHF1     | 0.211217 | 1.13E-05    | 5252   |
| LGR5     | 0.211202 | 1.13E-05    | 8549   |
| APOL2    | 0.211179 | 1.13E-05    | 23780  |
| GPR162   | 0.211157 | 1.13E-05    | 27239  |
| RBM17    | 0.211152 | 1.13E-05    | 84991  |
| RNF4     | 0.211148 | 1.14E-05    | 6047   |
| PALM     | 0.211132 | 1.14E-05    | 5064   |
| CXCR1    | 0.211131 | 1.14E-05    | 3577   |
| MAGED1   | 0.211104 | 1.14E-05    | 9500   |
| CPVL     | 0.210938 | 1.16E-05    | 54504  |
| AMN1     | 0.210911 | 1.16E-05    | 196394 |
| AGR1     | 0.210896 | 1.16E-05    | 375790 |
| PPP2R4   | 0.210877 | 1.17E-05 NA |        |
| PTCRA    | 0.210837 | 1.17E-05    | 171558 |
| TAOK2    | 0.21083  | 1.17E-05    | 9344   |
| ASPRV1   | 0.210797 | 1.17E-05    | 151516 |
| UTP15    | 0.210786 | 1.18E-05    | 84135  |
| RGS18    | 0.210783 | 1.18E-05    | 64407  |
| FOXQ1    | 0.210753 | 1.18E-05    | 94234  |
| DAGLB    | 0.210739 | 1.18E-05    | 221955 |
| FBXO18   | 0.210739 | 1.18E-05 NA |        |
| TAB3     | 0.210734 | 1.18E-05    | 257397 |
| KIAA1549 | 0.210723 | 1.18E-05    | 57670  |
| SNX12    | 0.210708 | 1.18E-05    | 29934  |
| BSCL2    | 0.21066  | 1.19E-05    | 26580  |
| LIN37    | 0.210633 | 1.19E-05    | 55957  |
| PRR12    | 0.210531 | 1.21E-05    | 57479  |
| ZNF487   | 0.210528 | 1.21E-05    | 642819 |
| TFAP2C   | 0.210434 | 1.22E-05    | 7022   |
| SYBU     | 0.210419 | 1.22E-05    | 55638  |
| PAQR3    | 0.21036  | 1.23E-05    | 152559 |
| CUEDC2   | 0.21036  | 1.23E-05    | 79004  |
| TMEM130  | 0.210348 | 1.23E-05    | 222865 |
| PIK3CB   | 0.210263 | 1.24E-05    | 5291   |
| TNFRSF21 | 0.210262 | 1.24E-05    | 27242  |
| SPEF2    | 0.210261 | 1.24E-05    | 79925  |
| VMA21    | 0.210256 | 1.24E-05    | 203547 |
| ZNF263   | 0.210214 | 1.24E-05    | 10127  |
| DFNB59   | 0.2102   | 1.25E-05 NA |        |
| ZNF835   | 0.210196 | 1.25E-05    | 90485  |
| ADAMTS1  | 0.210187 | 1.25E-05    | 9510   |
| CAPZA1   | 0.210186 | 1.25E-05    | 829    |
| CAMKK2   | 0.210176 | 1.25E-05    | 10645  |
| RAD17    | 0.210174 | 1.25E-05    | 5884   |
| EPHA4    | 0.210147 | 1.25E-05    | 2043   |
| ZNF780B  | 0.210104 | 1.26E-05    | 163131 |
| PLA2R1   | 0.210092 | 1.26E-05    | 22925  |
| SLAMF1   | 0.210085 | 1.26E-05    | 6504   |
| PSPC1    | 0.210055 | 1.26E-05    | 55269  |
| DROSHA   | 0.210049 | 1.26E-05    | 29102  |
| CYP8B1   | 0.210049 | 1.26E-05    | 1582   |
| FTSJ1    | 0.210047 | 1.26E-05    | 24140  |
| IL31RA   | 0.210039 | 1.26E-05    | 133396 |
| NPTXR    | 0.210034 | 1.27E-05    | 23467  |
| CWC15    | 0.210002 | 1.27E-05    | 51503  |
| AP3B1    | 0.210002 | 1.27E-05    | 8546   |
| FAM83D   | 0.209999 | 1.27E-05    | 81610  |
| PIGF     | 0.209977 | 1.27E-05    | 5281   |
| ZNF224   | 0.20997  | 1.27E-05    | 7767   |
| USB1     | 0.209955 | 1.28E-05    | 79650  |

|          |          |             |        |
|----------|----------|-------------|--------|
| NCOA1    | 0.209938 | 1.28E-05    | 8648   |
| YIPF6    | 0.2099   | 1.28E-05    | 286451 |
| NUDT17   | 0.209841 | 1.29E-05    | 200035 |
| SETDB1   | 0.209834 | 1.29E-05    | 9869   |
| NRF1     | 0.209828 | 1.29E-05    | 4899   |
| ZNF727   | 0.209811 | 1.29E-05    | 442319 |
| ABCB4    | 0.209792 | 1.30E-05    | 5244   |
| SMG7     | 0.209775 | 1.30E-05    | 9887   |
| RTF1     | 0.209744 | 1.30E-05    | 23168  |
| AP4S1    | 0.20973  | 1.30E-05    | 11154  |
| PPTC7    | 0.209705 | 1.31E-05    | 160760 |
| SGK494   | 0.209695 | 1.31E-05 NA |        |
| PDE4D    | 0.209635 | 1.32E-05    | 5144   |
| GALNT6   | 0.209629 | 1.32E-05    | 11226  |
| DVL2     | 0.209625 | 1.32E-05    | 1856   |
| SUMF2    | 0.209622 | 1.32E-05    | 25870  |
| COL27A1  | 0.209622 | 1.32E-05    | 85301  |
| CARS     | 0.209603 | 1.32E-05 NA |        |
| GPATCH1  | 0.209584 | 1.32E-05    | 55094  |
| ARPC5    | 0.209573 | 1.32E-05    | 10092  |
| INTS12   | 0.209567 | 1.32E-05    | 57117  |
| IK       | 0.209566 | 1.32E-05    | 3550   |
| EXO5     | 0.209565 | 1.32E-05    | 64789  |
| KIAA0100 | 0.209559 | 1.33E-05    | 9703   |
| SNCA     | 0.209556 | 1.33E-05    | 6622   |
| PROCR    | 0.209552 | 1.33E-05    | 10544  |
| PARP1    | 0.209548 | 1.33E-05    | 142    |
| MAGT1    | 0.209533 | 1.33E-05    | 84061  |
| CSNK1E   | 0.209499 | 1.33E-05    | 1454   |
| ZNF584   | 0.209497 | 1.33E-05    | 201514 |
| SPRY3    | 0.209495 | 1.33E-05    | 10251  |
| ZFAND6   | 0.209485 | 1.33E-05    | 54469  |
| ZNF776   | 0.209481 | 1.34E-05    | 284309 |
| SYT2     | 0.209465 | 1.34E-05    | 127833 |
| CFAP53   | 0.209457 | 1.34E-05    | 220136 |
| KRBA1    | 0.209422 | 1.34E-05    | 84626  |
| C6orf211 | 0.209406 | 1.35E-05 NA |        |
| STT3B    | 0.209368 | 1.35E-05    | 201595 |
| KLHDC8A  | 0.209363 | 1.35E-05    | 55220  |
| ALKBH1   | 0.209342 | 1.35E-05    | 8846   |
| PRPF3    | 0.209296 | 1.36E-05    | 9129   |
| NDNL2    | 0.209279 | 1.36E-05 NA |        |
| NEK10    | 0.20926  | 1.36E-05    | 152110 |
| GCLM     | 0.209245 | 1.37E-05    | 2730   |
| CDC14B   | 0.209239 | 1.37E-05    | 8555   |
| RFWD3    | 0.209238 | 1.37E-05    | 55159  |
| GDPD5    | 0.209233 | 1.37E-05    | 81544  |
| SHANK2   | 0.209232 | 1.37E-05    | 22941  |
| KIAA1107 | 0.209219 | 1.37E-05 NA |        |
| TAF15    | 0.209215 | 1.37E-05    | 8148   |
| GATAD1   | 0.20921  | 1.37E-05    | 57798  |
| RBBP9    | 0.209204 | 1.37E-05    | 10741  |
| MICB     | 0.209145 | 1.38E-05    | 4277   |
| RNF40    | 0.209124 | 1.38E-05    | 9810   |
| TTC23L   | 0.209116 | 1.38E-05    | 153657 |
| C17orf47 | 0.20911  | 1.38E-05 NA |        |
| MRPL50   | 0.209092 | 1.39E-05    | 54534  |
| C6orf201 | 0.20908  | 1.39E-05    | 404220 |
| EWSR1    | 0.209016 | 1.40E-05    | 2130   |
| PPAT     | 0.209007 | 1.40E-05    | 5471   |

|               |          |             |        |
|---------------|----------|-------------|--------|
| UBE2G1        | 0.208977 | 1.40E-05    | 7326   |
| PCDHGA8       | 0.208954 | 1.41E-05    | 9708   |
| ANKRD53       | 0.20892  | 1.41E-05    | 79998  |
| GCLC          | 0.208848 | 1.42E-05    | 2729   |
| TRMT112       | 0.208815 | 1.42E-05    | 51504  |
| EIF3H         | 0.208774 | 1.43E-05    | 8667   |
| PLEKHN1       | 0.208751 | 1.43E-05    | 84069  |
| PCDHGA2       | 0.208732 | 1.44E-05    | 56113  |
| ANKRD18A      | 0.208704 | 1.44E-05    | 253650 |
| IP6K1         | 0.20869  | 1.44E-05    | 9807   |
| CLDN20        | 0.208626 | 1.45E-05    | 49861  |
| ACIN1         | 0.208611 | 1.45E-05    | 22985  |
| NIFK          | 0.208605 | 1.45E-05    | 84365  |
| FAM72D        | 0.208567 | 1.46E-05    | 728833 |
| CSTF1         | 0.208562 | 1.46E-05    | 1477   |
| ANKRD46       | 0.208556 | 1.46E-05    | 157567 |
| ADCY2         | 0.208531 | 1.46E-05    | 108    |
| ANKS1A        | 0.208515 | 1.47E-05    | 23294  |
| WDHD1         | 0.208489 | 1.47E-05    | 11169  |
| PBXIP1        | 0.208463 | 1.47E-05    | 57326  |
| FHOD3         | 0.208443 | 1.48E-05    | 80206  |
| CYP21A2       | 0.208418 | 1.48E-05    | 1589   |
| CD1B          | 0.208417 | 1.48E-05    | 910    |
| FUNDC2        | 0.208413 | 1.48E-05    | 65991  |
| LRRC20        | 0.208401 | 1.48E-05    | 55222  |
| WDR12         | 0.208366 | 1.49E-05    | 55759  |
| ARL6IP1       | 0.208334 | 1.49E-05    | 23204  |
| TRAK2         | 0.208332 | 1.49E-05    | 66008  |
| SLC37A3       | 0.208329 | 1.49E-05    | 84255  |
| TMEM242       | 0.208234 | 1.51E-05    | 729515 |
| SLC47A1       | 0.208224 | 1.51E-05    | 55244  |
| MMP3          | 0.208168 | 1.52E-05    | 4314   |
| WASF2         | 0.208156 | 1.52E-05    | 10163  |
| LRRC39        | 0.208154 | 1.52E-05    | 127495 |
| CNOT8         | 0.208154 | 1.52E-05    | 9337   |
| ANGEL1        | 0.208137 | 1.52E-05    | 23357  |
| IL17RD        | 0.208122 | 1.52E-05    | 54756  |
| SNX8          | 0.208101 | 1.53E-05    | 29886  |
| SLC4A5        | 0.208095 | 1.53E-05    | 57835  |
| SPAG8         | 0.208024 | 1.54E-05    | 26206  |
| PRR4          | 0.207969 | 1.55E-05    | 11272  |
| RP11-613M10.8 | 0.2079   | 1.56E-05 NA |        |
| MAP3K9        | 0.20788  | 1.56E-05    | 4293   |
| ZNF736        | 0.207837 | 1.57E-05    | 728927 |
| GFOD1         | 0.207788 | 1.57E-05    | 54438  |
| MNT           | 0.207753 | 1.58E-05    | 4335   |
| PTDSS1        | 0.207747 | 1.58E-05    | 9791   |
| HSD11B2       | -0.20774 | 1.58E-05    | 3291   |
| ZNF701        | 0.207718 | 1.58E-05    | 55762  |
| TDRP          | 0.207708 | 1.58E-05    | 157695 |
| ZNF195        | 0.207666 | 1.59E-05    | 7748   |
| LEP           | 0.207656 | 1.59E-05    | 3952   |
| CEP192        | 0.207643 | 1.59E-05    | 55125  |
| FOXK1         | 0.20761  | 1.60E-05    | 221937 |
| MAP3K13       | 0.207574 | 1.61E-05    | 9175   |
| RCC2          | 0.207573 | 1.61E-05    | 55920  |
| CHIC1         | 0.207548 | 1.61E-05    | 53344  |
| RPTOR         | 0.207531 | 1.61E-05    | 57521  |
| NRG3          | 0.207523 | 1.61E-05    | 10718  |
| TSPYL6        | 0.207516 | 1.61E-05    | 388951 |

|          |          |             |           |
|----------|----------|-------------|-----------|
| ARL1     | 0.207493 | 1.62E-05    | 400       |
| RTEL1    | 0.207475 | 1.62E-05    | 51750     |
| ZWILCH   | 0.207454 | 1.62E-05    | 55055     |
| C16orf96 | 0.207452 | 1.62E-05    | 342346    |
| UNK      | 0.207451 | 1.62E-05    | 85451     |
| SLC22A15 | 0.207438 | 1.63E-05    | 55356     |
| TEAD3    | 0.207433 | 1.63E-05    | 7005      |
| PARP2    | 0.207383 | 1.64E-05    | 10038     |
| F3       | 0.207346 | 1.64E-05    | 2152      |
| UBE2L6   | 0.207337 | 1.64E-05    | 9246      |
| LRIF1    | 0.2073   | 1.65E-05    | 55791     |
| ATG13    | 0.207299 | 1.65E-05    | 9776      |
| GPSM2    | 0.207267 | 1.65E-05    | 29899     |
| ZNF441   | 0.207259 | 1.65E-05    | 126068    |
| ZNHIT3   | 0.207243 | 1.66E-05    | 9326      |
| DNAAF2   | 0.207217 | 1.66E-05    | 55172     |
| FBXL17   | 0.207191 | 1.67E-05    | 64839     |
| LARS     | 0.207176 | 1.67E-05 NA |           |
| ENPP2    | 0.207153 | 1.67E-05    | 5168      |
| ANKFY1   | 0.207132 | 1.67E-05    | 51479     |
| TMEM54   | -0.20711 | 1.68E-05    | 113452    |
| CCNL1    | 0.207108 | 1.68E-05    | 57018     |
| DRG1     | 0.20709  | 1.68E-05    | 4733      |
| RPA2     | 0.207062 | 1.69E-05    | 6118      |
| GPR22    | 0.20704  | 1.69E-05    | 2845      |
| EXD2     | 0.207018 | 1.69E-05    | 55218     |
| VTCN1    | 0.207005 | 1.70E-05    | 79679     |
| ZBTB10   | 0.207002 | 1.70E-05    | 65986     |
| ADAMTSL2 | 0.206981 | 1.70E-05    | 9719      |
| S100A13  | 0.206962 | 1.70E-05    | 6284      |
| GOLPH3   | 0.206955 | 1.70E-05    | 64083     |
| DCUN1D5  | 0.206952 | 1.70E-05    | 84259     |
| HDAC8    | 0.206952 | 1.70E-05    | 55869     |
| CLCN7    | 0.206946 | 1.71E-05    | 1186      |
| TOMM70A  | 0.206945 | 1.71E-05 NA |           |
| DUSP18   | 0.206926 | 1.71E-05    | 150290    |
| FNDC9    | 0.206916 | 1.71E-05    | 408263    |
| EZH1     | 0.206836 | 1.72E-05    | 2145      |
| METTL23  | 0.206827 | 1.72E-05    | 124512    |
| GSPT1    | 0.206822 | 1.73E-05    | 2935      |
| GPX1     | 0.206805 | 1.73E-05    | 2876      |
| PRPS1    | 0.206802 | 1.73E-05    | 5631      |
| TIMMDC1  | 0.206793 | 1.73E-05    | 51300     |
| ZNF737   | 0.20678  | 1.73E-05    | 100129842 |
| TCHP     | 0.206775 | 1.73E-05    | 84260     |
| CTPS1    | 0.206748 | 1.74E-05    | 1503      |
| MLLT1    | 0.206738 | 1.74E-05    | 4298      |
| HLA-DRB5 | 0.20673  | 1.74E-05    | 3127      |
| RANBP17  | 0.20673  | 1.74E-05    | 64901     |
| RALB     | 0.206722 | 1.74E-05    | 5899      |
| GPR89B   | 0.206717 | 1.74E-05    | 51463     |
| FOCAD    | 0.206707 | 1.74E-05    | 54914     |
| NKAP     | 0.206695 | 1.75E-05    | 79576     |
| VPS13D   | 0.206675 | 1.75E-05    | 55187     |
| COPS5    | 0.206617 | 1.76E-05    | 10987     |
| CRTC2    | 0.20661  | 1.76E-05    | 200186    |
| SBDS     | 0.206594 | 1.76E-05    | 51119     |
| AGPAT1   | 0.206581 | 1.77E-05    | 10554     |
| NUP107   | 0.206579 | 1.77E-05    | 57122     |
| PHF8     | 0.206577 | 1.77E-05    | 23133     |

|               |          |             |        |
|---------------|----------|-------------|--------|
| ETF1          | 0.206552 | 1.77E-05    | 2107   |
| CUL1          | 0.20654  | 1.77E-05    | 8454   |
| MOB3C         | 0.20653  | 1.77E-05    | 148932 |
| MCPH1         | 0.20653  | 1.77E-05    | 79648  |
| TTC23         | 0.206429 | 1.79E-05    | 64927  |
| SETD1A        | 0.206413 | 1.79E-05    | 9739   |
| HDAC4         | 0.206409 | 1.79E-05    | 9759   |
| C19orf68      | 0.206343 | 1.81E-05 NA |        |
| DUSP1         | 0.206337 | 1.81E-05    | 1843   |
| GOLGA8H       | 0.206317 | 1.81E-05    | 728498 |
| EGFR          | 0.206289 | 1.82E-05    | 1956   |
| PIAS2         | 0.206281 | 1.82E-05    | 9063   |
| TSPAN18       | 0.206281 | 1.82E-05    | 90139  |
| CYP24A1       | 0.20627  | 1.82E-05    | 1591   |
| DEF6          | 0.20623  | 1.83E-05    | 50619  |
| FGD1          | 0.206151 | 1.84E-05    | 2245   |
| ST6GAL1       | 0.206017 | 1.86E-05    | 6480   |
| TRMT6         | 0.20599  | 1.87E-05    | 51605  |
| GMCL1         | 0.205981 | 1.87E-05    | 64395  |
| POLR3H        | 0.205975 | 1.87E-05    | 171568 |
| R3HDM2        | 0.205956 | 1.87E-05    | 22864  |
| MYEOV         | 0.205935 | 1.88E-05    | 26579  |
| OLFML2A       | 0.205931 | 1.88E-05    | 169611 |
| HILPDA        | 0.205917 | 1.88E-05    | 29923  |
| ENO2          | 0.205916 | 1.88E-05    | 2026   |
| SCYL3         | 0.205916 | 1.88E-05    | 57147  |
| PRRC2A        | 0.205911 | 1.88E-05    | 7916   |
| AC092835.2    | 0.205901 | 1.88E-05 NA |        |
| RP11-446E24.4 | 0.205889 | 1.89E-05 NA |        |
| IFIT2         | 0.205882 | 1.89E-05    | 3433   |
| CRY2          | 0.20584  | 1.90E-05    | 1408   |
| CSNK1G3       | 0.205826 | 1.90E-05    | 1456   |
| BBOX1         | 0.2058   | 1.90E-05    | 8424   |
| FAM72A        | 0.205789 | 1.90E-05    | 729533 |
| NR2C1         | 0.205782 | 1.91E-05    | 7181   |
| MRPL33        | 0.20577  | 1.91E-05    | 9553   |
| PYGL          | 0.205758 | 1.91E-05    | 5836   |
| EBF4          | 0.20575  | 1.91E-05    | 57593  |
| ARIH2         | 0.205743 | 1.91E-05    | 10425  |
| ATXN7L3B      | 0.205737 | 1.91E-05    | 552889 |
| RP11-437B10.1 | 0.20572  | 1.92E-05 NA |        |
| UBXN1         | 0.205713 | 1.92E-05    | 51035  |
| KARS          | 0.205692 | 1.92E-05 NA |        |
| DDX27         | 0.205676 | 1.93E-05    | 55661  |
| LUC7L3        | 0.205625 | 1.93E-05    | 51747  |
| PLEC          | 0.205608 | 1.94E-05    | 5339   |
| SUV420H1      | 0.205581 | 1.94E-05 NA |        |
| INTS7         | 0.205565 | 1.95E-05    | 25896  |
| BIVM          | 0.20555  | 1.95E-05    | 54841  |
| SNX33         | 0.205545 | 1.95E-05    | 257364 |
| HSD3B7        | 0.205515 | 1.95E-05    | 80270  |
| ZNF773        | 0.205462 | 1.96E-05    | 374928 |
| TSC1          | 0.205461 | 1.96E-05    | 7248   |
| GRWD1         | 0.205452 | 1.97E-05    | 83743  |
| SRSF4         | 0.205415 | 1.97E-05    | 6429   |
| SDC1          | 0.205394 | 1.98E-05    | 6382   |
| CHMP3         | 0.205382 | 1.98E-05    | 51652  |
| SLX4IP        | 0.205374 | 1.98E-05    | 128710 |
| RP11-864I4.1  | 0.205359 | 1.98E-05 NA |        |
| KXD1          | 0.205345 | 1.99E-05    | 79036  |

|            |          |             |        |
|------------|----------|-------------|--------|
| SF1        | 0.205344 | 1.99E-05    | 7536   |
| STC2       | 0.205322 | 1.99E-05    | 8614   |
| ANKRD22    | 0.205312 | 1.99E-05    | 118932 |
| RRH        | 0.205294 | 2.00E-05    | 10692  |
| ISCU       | 0.205294 | 2.00E-05    | 23479  |
| BARD1      | 0.20527  | 2.00E-05    | 580    |
| TBC1D12    | 0.205256 | 2.00E-05    | 23232  |
| ZDHHC8     | 0.2052   | 2.01E-05    | 29801  |
| RAD50      | 0.205133 | 2.03E-05    | 10111  |
| GPALPP1    | 0.205076 | 2.04E-05    | 55425  |
| GLA        | 0.205066 | 2.04E-05    | 2717   |
| PHLDB3     | 0.205052 | 2.04E-05    | 653583 |
| PTPN6      | 0.205021 | 2.05E-05    | 5777   |
| KLF10      | 0.204992 | 2.05E-05    | 7071   |
| C15orf52   | 0.204922 | 2.07E-05 NA |        |
| WEE1       | 0.20492  | 2.07E-05    | 7465   |
| PARP4      | 0.204905 | 2.07E-05    | 143    |
| AFTPH      | 0.204802 | 2.09E-05    | 54812  |
| CAMP       | 0.20477  | 2.10E-05    | 820    |
| ACTL6A     | 0.204764 | 2.10E-05    | 86     |
| BACH2      | 0.204757 | 2.10E-05    | 60468  |
| IL13RA1    | 0.204721 | 2.11E-05    | 3597   |
| IPO13      | 0.20471  | 2.11E-05    | 9670   |
| ZNF558     | 0.204703 | 2.11E-05    | 148156 |
| FAM159A    | 0.204702 | 2.11E-05 NA |        |
| GZF1       | 0.204696 | 2.11E-05    | 64412  |
| LSG1       | 0.20468  | 2.12E-05    | 55341  |
| CKAP5      | 0.204673 | 2.12E-05    | 9793   |
| PRX        | 0.204635 | 2.13E-05    | 57716  |
| ODF3B      | 0.204609 | 2.13E-05    | 440836 |
| PTP4A2     | 0.204569 | 2.14E-05    | 8073   |
| CRYAB      | 0.204564 | 2.14E-05    | 1410   |
| ZBTB12     | 0.20455  | 2.14E-05    | 221527 |
| TMEM209    | 0.204547 | 2.14E-05    | 84928  |
| KIAA0895   | 0.204534 | 2.15E-05    | 23366  |
| SYS1       | 0.204486 | 2.16E-05    | 90196  |
| TEC        | 0.204406 | 2.17E-05    | 7006   |
| PIEZO1     | 0.204396 | 2.17E-05    | 9780   |
| ENHO       | -0.20438 | 2.18E-05    | 375704 |
| ANKRD13D   | 0.204368 | 2.18E-05    | 338692 |
| BEX4       | 0.20434  | 2.19E-05    | 56271  |
| CDC42BPB   | 0.204334 | 2.19E-05    | 9578   |
| CYP11A1    | 0.204323 | 2.19E-05    | 1583   |
| LMO7       | 0.204321 | 2.19E-05    | 4008   |
| EI24       | 0.204309 | 2.19E-05    | 9538   |
| TMEM39B    | 0.20428  | 2.20E-05    | 55116  |
| GOLGA7B    | 0.204258 | 2.20E-05    | 401647 |
| SNRNP200   | 0.204245 | 2.21E-05    | 23020  |
| PARVB      | 0.204201 | 2.21E-05    | 29780  |
| ACP2       | 0.204183 | 2.22E-05    | 53     |
| LAP3       | 0.204176 | 2.22E-05    | 51056  |
| PDIA5      | 0.204157 | 2.22E-05    | 10954  |
| UAP1L1     | 0.204123 | 2.23E-05    | 91373  |
| RNFT1      | 0.204122 | 2.23E-05    | 51136  |
| PDPK1      | 0.204106 | 2.23E-05    | 5170   |
| ATP6AP1    | 0.204027 | 2.25E-05    | 537    |
| COIL       | 0.204014 | 2.25E-05    | 8161   |
| TNF        | 0.203998 | 2.26E-05    | 7124   |
| KLF9       | 0.203967 | 2.26E-05    | 687    |
| AL138706.2 | 0.203936 | 2.27E-05 NA |        |

|          |          |             |        |
|----------|----------|-------------|--------|
| C8orf44  | 0.203925 | 2.27E-05    | 56260  |
| CCDC38   | 0.203878 | 2.28E-05    | 120935 |
| C5orf49  | 0.203867 | 2.29E-05    | 134121 |
| GNL3     | 0.203861 | 2.29E-05    | 26354  |
| TSEN15   | 0.203842 | 2.29E-05    | 116461 |
| FBXO48   | 0.203813 | 2.30E-05    | 554251 |
| INPP5D   | 0.203753 | 2.31E-05    | 3635   |
| TAF11    | 0.203724 | 2.32E-05    | 6882   |
| HNRNPA0  | 0.203705 | 2.32E-05    | 10949  |
| CTNNBL1  | 0.203683 | 2.33E-05    | 56259  |
| CSNK2A2  | 0.203671 | 2.33E-05    | 1459   |
| NPEPPS   | 0.203666 | 2.33E-05    | 9520   |
| ZNF7     | 0.203664 | 2.33E-05    | 7553   |
| EPRS     | 0.203651 | 2.33E-05 NA |        |
| AP2A1    | 0.20363  | 2.34E-05    | 160    |
| KLRK1    | 0.203588 | 2.35E-05    | 22914  |
| TXNRD3   | 0.203584 | 2.35E-05    | 114112 |
| TOPBP1   | 0.203546 | 2.36E-05    | 11073  |
| CAP1     | 0.203475 | 2.37E-05    | 10487  |
| DDX1     | 0.203464 | 2.37E-05    | 1653   |
| SMYD4    | 0.203433 | 2.38E-05    | 114826 |
| MLLT4    | 0.20337  | 2.40E-05 NA |        |
| ZMIZ2    | 0.203368 | 2.40E-05    | 83637  |
| COX7A1   | 0.203326 | 2.41E-05    | 1346   |
| LYPLA1   | 0.203299 | 2.41E-05    | 10434  |
| MADD     | 0.203279 | 2.42E-05    | 8567   |
| DCK      | 0.203246 | 2.42E-05    | 1633   |
| CDK2     | 0.203205 | 2.43E-05    | 1017   |
| DKK1     | 0.203182 | 2.44E-05    | 22943  |
| CHTOP    | 0.203161 | 2.44E-05    | 26097  |
| DPH3     | 0.20315  | 2.45E-05    | 285381 |
| TMEM232  | 0.203146 | 2.45E-05    | 642987 |
| FAM124A  | 0.203093 | 2.46E-05    | 220108 |
| CROCC    | 0.203073 | 2.46E-05    | 9696   |
| RARS     | 0.203028 | 2.47E-05 NA |        |
| AIM2     | 0.203026 | 2.47E-05    | 9447   |
| SYTL4    | 0.203015 | 2.48E-05    | 94121  |
| EPB41L5  | 0.203006 | 2.48E-05    | 57669  |
| SLC35F4  | 0.202974 | 2.49E-05    | 341880 |
| MED22    | 0.202971 | 2.49E-05    | 6837   |
| TYW1B    | 0.202944 | 2.49E-05    | 441250 |
| PARP6    | 0.202936 | 2.50E-05    | 56965  |
| DEXI     | 0.202918 | 2.50E-05    | 28955  |
| AREL1    | 0.202902 | 2.50E-05    | 9870   |
| FBXO22   | 0.202865 | 2.51E-05    | 26263  |
| ZC3HAV1L | 0.202833 | 2.52E-05    | 92092  |
| NUP155   | 0.202833 | 2.52E-05    | 9631   |
| PREB     | 0.2027   | 2.55E-05    | 10113  |
| CNPY2    | 0.202665 | 2.56E-05    | 10330  |
| TBC1D4   | 0.20266  | 2.56E-05    | 9882   |
| PGAP1    | 0.202637 | 2.57E-05    | 80055  |
| CCL28    | -0.20264 | 2.57E-05    | 56477  |
| FASTKD2  | 0.202633 | 2.57E-05    | 22868  |
| SLC39A7  | 0.202632 | 2.57E-05    | 7922   |
| ARL6IP6  | 0.202632 | 2.57E-05    | 151188 |
| NBEAL1   | 0.202624 | 2.57E-05    | 65065  |
| MTHFSD   | 0.202574 | 2.58E-05    | 64779  |
| ABHD16A  | 0.202571 | 2.58E-05    | 7920   |
| CLIP3    | 0.20255  | 2.59E-05    | 25999  |
| GPR82    | 0.202498 | 2.60E-05    | 27197  |

|          |          |             |           |
|----------|----------|-------------|-----------|
| FAM216A  | 0.202477 | 2.60E-05    | 29902     |
| METTL20  | 0.202449 | 2.61E-05 NA |           |
| L3MBTL2  | 0.202446 | 2.61E-05    | 83746     |
| EIF2B1   | 0.202429 | 2.62E-05    | 1967      |
| ZNF467   | 0.202414 | 2.62E-05    | 168544    |
| ACSL3    | 0.202379 | 2.63E-05    | 2181      |
| HTATSF1  | 0.202375 | 2.63E-05    | 27336     |
| ARID1A   | 0.202369 | 2.63E-05    | 8289      |
| BCL2L13  | 0.202356 | 2.63E-05    | 23786     |
| SUGP2    | 0.202311 | 2.65E-05    | 10147     |
| C16orf95 | 0.202285 | 2.65E-05    | 100506581 |
| RANBP3   | 0.20226  | 2.66E-05    | 8498      |
| FAM32A   | 0.202253 | 2.66E-05    | 26017     |
| RTFDC1   | 0.202216 | 2.67E-05 NA |           |
| ZNF77    | 0.202211 | 2.67E-05    | 58492     |
| AP2B1    | 0.202202 | 2.67E-05    | 163       |
| TBL1X    | 0.202197 | 2.67E-05    | 6907      |
| TM4SF18  | 0.202182 | 2.68E-05    | 116441    |
| NKRF     | 0.202179 | 2.68E-05    | 55922     |
| GTF3C2   | 0.202175 | 2.68E-05    | 2976      |
| TAMM41   | 0.202172 | 2.68E-05    | 132001    |
| U2AF1    | 0.202161 | 2.68E-05    | 7307      |
| SLC2A10  | 0.202159 | 2.68E-05    | 81031     |
| CLEC16A  | 0.202121 | 2.69E-05    | 23274     |
| SMIM17   | 0.202109 | 2.70E-05    | 147670    |
| PAXBP1   | 0.202108 | 2.70E-05    | 94104     |
| WDR46    | 0.202101 | 2.70E-05    | 9277      |
| NUP43    | 0.20209  | 2.70E-05    | 348995    |
| PBDC1    | 0.202056 | 2.71E-05    | 51260     |
| TSSK4    | 0.202015 | 2.72E-05    | 283629    |
| AQR      | 0.202009 | 2.72E-05    | 9716      |
| ZFP64    | 0.202001 | 2.72E-05    | 55734     |
| MTHFD2L  | 0.20199  | 2.73E-05    | 441024    |
| PSMA2    | 0.201983 | 2.73E-05    | 5683      |
| PRR14L   | 0.201957 | 2.73E-05    | 253143    |
| VTA1     | 0.201938 | 2.74E-05    | 51534     |
| FBXO9    | 0.201927 | 2.74E-05    | 26268     |
| ELP4     | 0.201877 | 2.76E-05    | 26610     |
| PIGW     | 0.201869 | 2.76E-05    | 284098    |
| ZNF691   | 0.201867 | 2.76E-05    | 51058     |
| DNAJC7   | 0.201827 | 2.77E-05    | 7266      |
| AOAH     | 0.201819 | 2.77E-05    | 313       |
| TOX4     | 0.201774 | 2.78E-05    | 9878      |
| PDIK1L   | 0.201765 | 2.78E-05    | 149420    |
| MS4A2    | 0.201746 | 2.79E-05    | 2206      |
| SCYL1    | 0.201719 | 2.80E-05    | 57410     |
| ZNF707   | 0.201713 | 2.80E-05    | 286075    |
| ORMDL1   | 0.201665 | 2.81E-05    | 94101     |
| APOLD1   | 0.201645 | 2.82E-05    | 81575     |
| PSMD10   | 0.20162  | 2.82E-05    | 5716      |
| MEA1     | 0.201563 | 2.84E-05    | 4201      |
| RAP1GDS1 | 0.201544 | 2.84E-05    | 5910      |
| KCTD14   | 0.201514 | 2.85E-05    | 65987     |
| RINT1    | 0.201503 | 2.85E-05    | 60561     |
| GUF1     | 0.201491 | 2.86E-05    | 60558     |
| EDEM2    | 0.201445 | 2.87E-05    | 55741     |
| PPP1R3F  | 0.20144  | 2.87E-05    | 89801     |
| MICAL3   | 0.201425 | 2.87E-05    | 57553     |
| XKRX     | 0.201413 | 2.88E-05    | 402415    |
| TIMM10B  | 0.201399 | 2.88E-05    | 26515     |



|            |          |             |        |
|------------|----------|-------------|--------|
| RALGPS2    | 0.201381 | 2.89E-05    | 55103  |
| VPS37D     | 0.201371 | 2.89E-05    | 155382 |
| NUP214     | 0.201359 | 2.89E-05    | 8021   |
| CD3EAP     | 0.201352 | 2.89E-05 NA |        |
| ZNF655     | 0.20134  | 2.90E-05    | 79027  |
| MFAP3L     | 0.201322 | 2.90E-05    | 9848   |
| HSPA1L     | 0.2013   | 2.91E-05    | 3305   |
| MAP6       | 0.201217 | 2.93E-05    | 4135   |
| STX5       | 0.201186 | 2.94E-05    | 6811   |
| ZDHHC16    | 0.201185 | 2.94E-05    | 84287  |
| AVEN       | 0.201178 | 2.94E-05    | 57099  |
| OXSRI      | 0.201159 | 2.95E-05    | 9943   |
| DCLK1      | 0.201116 | 2.96E-05    | 9201   |
| KIAA2018   | 0.2011   | 2.96E-05 NA |        |
| FAM19A3    | 0.201087 | 2.97E-05 NA |        |
| PLRG1      | 0.20104  | 2.98E-05    | 5356   |
| SCFD2      | 0.201031 | 2.98E-05    | 152579 |
| CREG2      | 0.200989 | 2.99E-05    | 200407 |
| IL13       | 0.200955 | 3.00E-05    | 3596   |
| RUFY4      | 0.200939 | 3.01E-05    | 285180 |
| GNPTAB     | 0.200897 | 3.02E-05    | 79158  |
| SLC30A1    | 0.200893 | 3.02E-05    | 7779   |
| CDKN2AIP   | 0.200863 | 3.03E-05    | 55602  |
| TCF7L1     | 0.200856 | 3.03E-05    | 83439  |
| ABCD1      | 0.200799 | 3.05E-05    | 215    |
| RSPH4A     | 0.200798 | 3.05E-05    | 345895 |
| MDM2       | 0.20076  | 3.06E-05    | 4193   |
| AL365181.2 | 0.200757 | 3.06E-05 NA |        |
| MAP1LC3B2  | 0.200732 | 3.07E-05    | 643246 |
| RANBP2     | 0.200715 | 3.07E-05    | 5903   |
| HAT1       | 0.200704 | 3.07E-05    | 8520   |
| MID1       | 0.200686 | 3.08E-05    | 4281   |
| NVL        | 0.20068  | 3.08E-05    | 4931   |
| MAGOHB     | 0.200661 | 3.09E-05    | 55110  |
| WNT7B      | 0.200641 | 3.09E-05    | 7477   |
| CYB5D1     | 0.200613 | 3.10E-05    | 124637 |
| YTHDF1     | 0.200609 | 3.10E-05    | 54915  |
| GNRHR      | 0.200602 | 3.10E-05    | 2798   |
| SNX20      | 0.200598 | 3.10E-05    | 124460 |
| KLHL36     | 0.20056  | 3.12E-05    | 79786  |
| BATF3      | 0.200559 | 3.12E-05    | 55509  |
| ASH2L      | 0.20054  | 3.12E-05    | 9070   |
| ZNF20      | 0.200512 | 3.13E-05    | 7568   |
| BCCIP      | 0.200504 | 3.13E-05    | 56647  |
| FAN1       | 0.200503 | 3.13E-05    | 22909  |
| DIMT1      | 0.200492 | 3.14E-05    | 27292  |
| NGDN       | 0.200485 | 3.14E-05    | 25983  |
| ADORA2A    | 0.200459 | 3.14E-05    | 135    |
| HNMT       | 0.200457 | 3.15E-05    | 3176   |
| ITGB6      | 0.20039  | 3.16E-05    | 3694   |
| RALGAPA1   | 0.200388 | 3.17E-05    | 253959 |
| ANKRD52    | 0.200384 | 3.17E-05    | 283373 |
| USP18      | 0.200356 | 3.17E-05    | 11274  |
| SAP30BP    | 0.200355 | 3.18E-05    | 29115  |
| TMEM230    | 0.200318 | 3.19E-05    | 29058  |
| DUS4L      | 0.200287 | 3.20E-05    | 11062  |
| MYH2       | 0.200255 | 3.20E-05    | 4620   |
| C17orf62   | 0.200235 | 3.21E-05 NA |        |
| ARL13A     | 0.200231 | 3.21E-05    | 392509 |
| FCRL5      | 0.20019  | 3.22E-05    | 83416  |

|         |          |             |        |
|---------|----------|-------------|--------|
| C7orf73 | 0.200186 | 3.23E-05 NA |        |
| TRIQQ   | 0.200134 | 3.24E-05    | 286144 |
| SERTM1  | 0.20013  | 3.24E-05    | 400120 |
| RTTN    | 0.200125 | 3.24E-05    | 25914  |
| TIGD2   | 0.20012  | 3.25E-05    | 166815 |
| MMADHC  | 0.200115 | 3.25E-05    | 27249  |
| WDR49   | 0.200112 | 3.25E-05    | 151790 |
| SNX1    | 0.200091 | 3.25E-05    | 6642   |
| YWHAB   | 0.200059 | 3.26E-05    | 7529   |
| BAG5    | 0.200045 | 3.27E-05    | 9529   |
| THPO    | 0.200021 | 3.28E-05    | 7066   |
